# Supplementary material for: Improved Wound Healing of Airway Epithelial Cells Is Mediated by Cold Atmospheric Plasma: A Time Course-Related Proteome Analysis
Source: Oxid Med Cell Longev. 2019 May 19;2019:7071536. doi: 10.1155/2019/7071536 (PMC6541959; doi:10.1155/2019/7071536)
Supplement: Supplementary Materials — Figure S-1: Gene Ontology Categories Classification (Panther) of all identified regulated proteins according to their cellular functions. Proteins were assigned to 16 biological processes and 11 molecular function categories. Figure S-2: visualization of time-related effects by Voronoi treemaps of CAP-treated vs. untreated S9 epithelial cells. Identified proteins were assorted into the individualised KEGG-BRITE hierarchy followed by the extraction of the subclass “oxidative stress” (A). Oxidative stress-related proteins were displayed for the time courses from 0 h up to 72 h (B). Every tile in that structural hierarchy, representing one identified protein, was coloured by fold changes (logarithmic normalized expression values from Delta2D of CAP-treated samples divided by expression values of untreated controls). The colour gradient encodes expression changes: white-coloured tiles show expressions, which correspond to a fold change of “1.” Blue-shaded tiles represent proteins with negative fold changes (lower expression in CAP-treated samples in comparison to the untreated controls), and shades of orange represent proteins with fold changes higher than “1.” Saturation of blue and orange is reached at an expression rate five times higher or lower than the corresponding control. The six different time points 0 h, 0.5 h, 1 h, 24 h, 48 h, and 72 h are displayed. Table S-1: register of all 1504 significant protein spots of the S9 epithelial cells passed the one-way ANOVA test (p value ≤0.05). Table S-2: established protein spot index obtained from Delta 2D analysis. Table S-3: summary results from network analysis using Ingenuity Pathway Analysis (IPA). Table S-4: detailed information on proteins/genes of all ten k-means clusters. Table S-5: summary results from network analysis using Ingenuity Pathway Analysis (IPA) for each single cluster. Table S-6: upregulated proteins (fold changes ≥1.5) in response to either short-term or long-term cultivation after CAP treatment o [file 7071536.f1.pdf]

**Figure S-1:** Gene Ontology Categories Classification (Panther) of all identified regulated proteins according to their cellular functions. Proteins were assigned to 16 biological processes and 11 molecular function categories.

**Figure S-1**

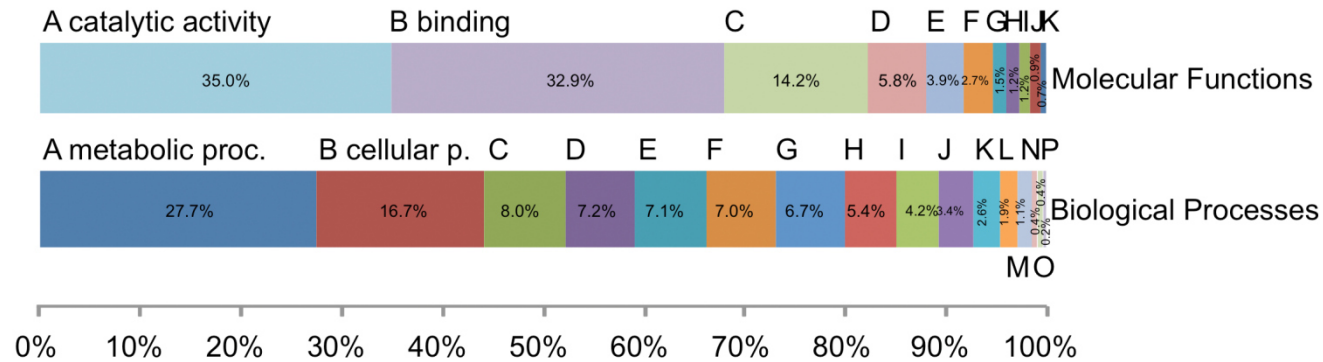

### Molecular functions

- A catalytic activity (GO:0003824): 205
- B binding (GO:0005488): 193
- C structural molecule activity (GO:0005198): 83
- D enzyme regulator activity (GO:0030234): 34
- E translation regulator activity (GO:0045182): 23
- F transcription regulator activity (GO:0030528): 16
- G transporter activity (GO:0005215): 9
- H receptor activity (GO:0004872): 7
- I motor activity (GO:0003774): 7
- J ion channel activity (GO:0005216): 5
- K antioxidant activity (GO:0016209): 4

### Biological process

- A metabolic process (GO:0008152): 297
- B cellular process (GO:0009987): 179
- C cell communication (GO:0007154): 86
- D developmental process (GO:0032502): 77
- E cell cycle (GO:0007049): 76
- F transport (GO:0006810): 75
- G cellular component organization (GO:0016043): 72
- H immune system process (GO:0002376): 58
- I response to stimulus (GO:0050896): 45
- J system process (GO:0003008): 36
- K apoptosis (GO:0006915): 28
- L generation of precursor metabolites and energy (GO:0006091): 20
- M cell adhesion (GO:0007155): 12
- N localization (GO:0051179): 4
- O reproduction (GO:0000003): 4
- P homeostatic process (GO:0042592): 2

**Figure S-2:** Visualization of time-related effects by Voronoi Treemaps of CAP treated vs. untreated S9 epithelial cells. Identified proteins were assorted into individualised KEGG-BRITE hierarchy followed by the extraction of the sub-class “oxidative stress” (**A**). Oxidative stress related proteins were displayed for the time courses from 0 h up to 72 h (**B**). Every tile in that structural hierarchy, representing one identified protein, was coloured by fold-changes (logarithmic normalized expression values from Delta-2D of CAP treated samples divided by expression values of untreated controls). The colour gradient encodes expression changes: white coloured tiles show expressions, which correspond to a fold change of ‘1’. Blue shaded tiles represent proteins with negative fold-changes (lower expression in CAP treated samples in comparison to the untreated controls) and shades of orange represent proteins with fold-changes higher than ‘1’. Saturation of blue and orange is reached at an expression rate five times higher or lower than the corresponding control. The six different time points 0 h, 0.5 h, 1 h, 24 h, 48 h and 72 h are displayed.

Figure S-2

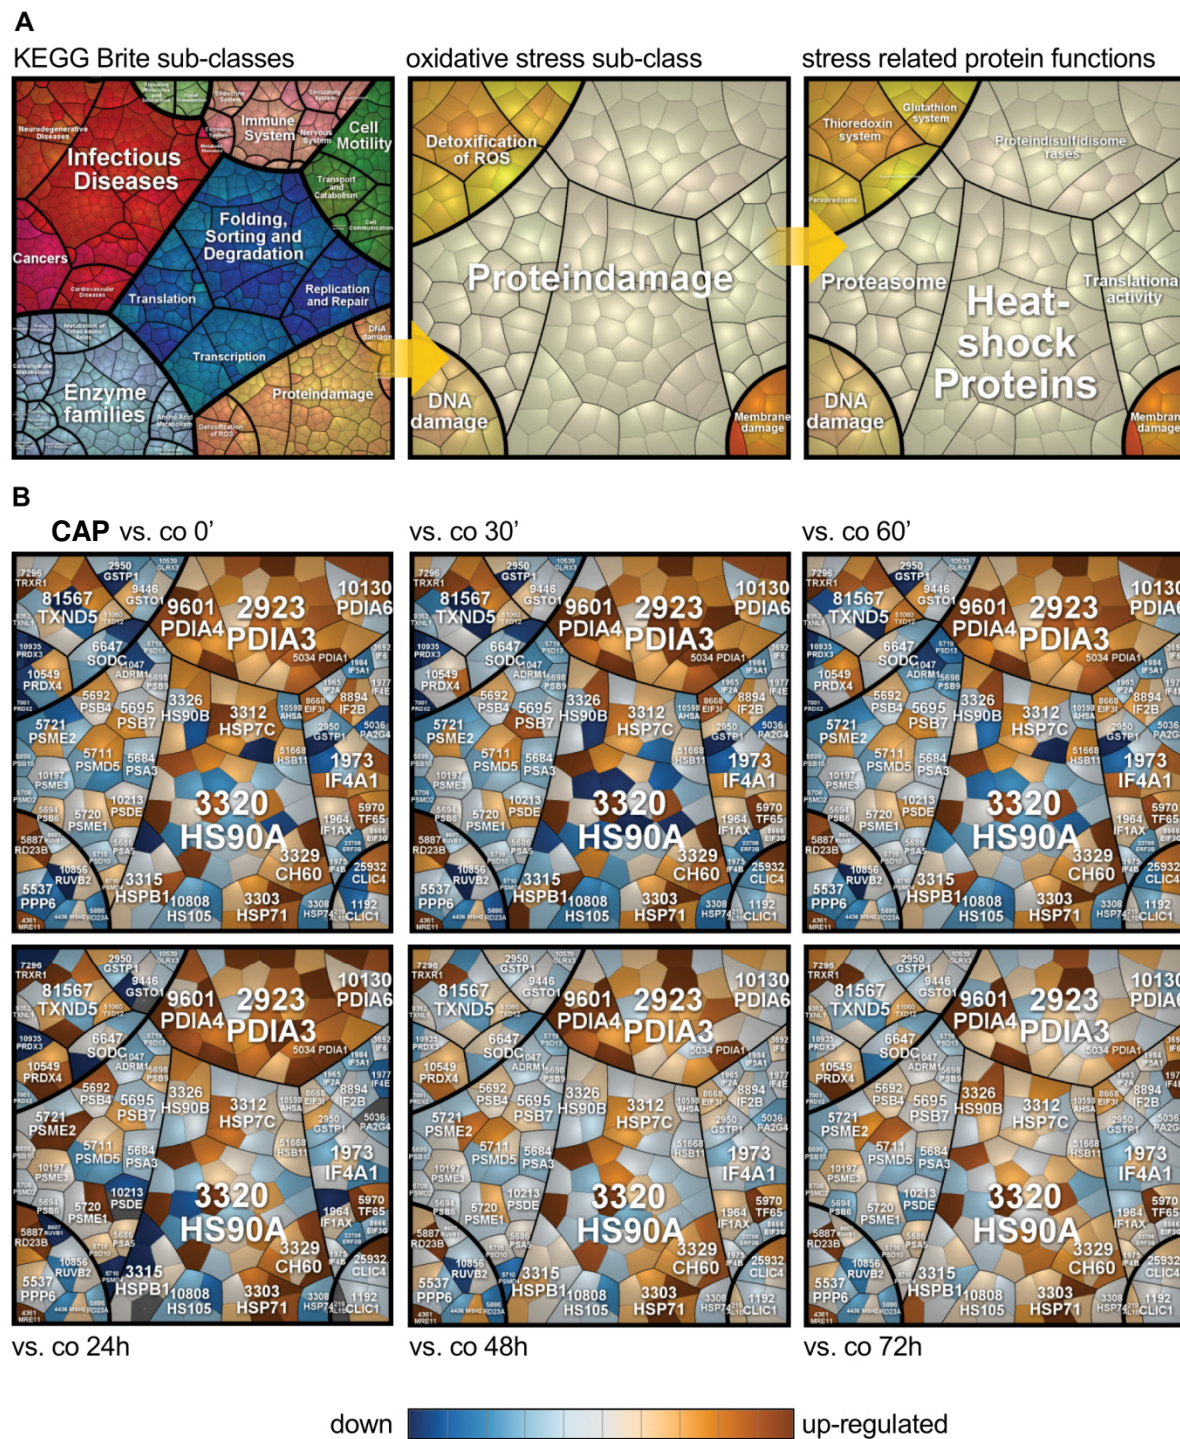

Table S-1

**Table S-1: Register of all 1504 significant protein spots of the S9 epithelial cells passed the One-way ANOVA test ( $p\text{-value} \leq 0.05$ )**

<sup>1</sup> hit ID obtained from Delta2D analysis (Delta2D statistically software version 4.4, Decodon (Germany, Greifswald))

<sup>2</sup> protein identification corresponding to human proteins (UniProt-SwissProt database; Rel. 51.5 restricted to human taxonomy)

<sup>3</sup> Median of normalized volumes of four technical replicates obtained from Delta2D analysis after 0, 30, 60 min and 24, 48 and 72 h of untreated (co) or plasma treated S9 epithelial cells (PI)

Table S-1

| ID <sup>1</sup> | Protein <sup>2</sup>  | Median of normalized volumes <sup>3</sup> |            |            |            |            |            |            |            |            |           |            |            |
|-----------------|-----------------------|-------------------------------------------|------------|------------|------------|------------|------------|------------|------------|------------|-----------|------------|------------|
|                 |                       | co_0 min                                  | co_30 min  | co_60 min  | co_24 h    | co_48 h    | co_72 h    | PI_0 min   | PI_30 min  | PI_60 min  | PI_24 h   | PI_48 h    | PI_72 h    |
| ID1449          | 1433B,1433G,TIF1B     | 95,583745                                 | 99,69177   | 103,72439  | 86,402165  | 88,133715  | 99,632305  | 55,551505  | 53,11662   | 65,341705  | 63,92361  | 60,095935  | 57,949365  |
| ID1403          | 1433E                 | 78,885515                                 | 83,20139   | 86,293905  | 75,572935  | 77,971885  | 85,833295  | 50,179895  | 48,66315   | 55,842215  | 51,6318   | 49,722     | 49,761455  |
| ID1391          | 1433E,CLIC1           | 96,41815                                  | 103,53994  | 104,064015 | 123,003225 | 118,67649  | 124,557025 | 72,216435  | 76,73614   | 83,320225  | 79,08991  | 82,70916   | 88,41856   |
| ID1425          | 1433G                 | 120,286435                                | 125,86943  | 133,46587  | 121,056245 | 120,714685 | 112,44005  | 72,454745  | 70,206145  | 77,769385  | 84,98135  | 81,55185   | 89,012665  |
| ID1438          | 1433S                 | 86,18513                                  | 92,022485  | 88,261085  | 107,51618  | 108,9057   | 106,98616  | 56,234135  | 58,940915  | 65,79851   | 71,36245  | 69,821605  | 68,70838   |
| ID1429          | 1433T,1433Z           | 79,13656                                  | 80,325945  | 88,866215  | 85,961805  | 86,448315  | 89,204765  | 40,29503   | 40,772145  | 47,790725  | 51,284    | 51,614215  | 54,94      |
| ID1430          | 1433Z                 | 70,63055                                  | 73,807055  | 81,0351    | 76,965945  | 79,090805  | 86,357345  | 44,81633   | 44,854425  | 52,33692   | 56,42529  | 55,64717   | 58,06992   |
| ID801           | 2AAA                  | 120,62813                                 | 104,26214  | 124,05182  | 103,117365 | 108,28765  | 109,717835 | 115,563675 | 138,82353  | 125,866765 | 120,78811 | 118,76194  | 105,495    |
| ID767           | 2AAB,UBQL1,IRGQ       | 110,51536                                 | 74,60654   | 108,66553  | 52,33244   | 53,24823   | 54,261375  | 198,125935 | 254,125055 | 217,184715 | 219,31879 | 203,33396  | 157,712605 |
| ID1399          | 3HIDH,PSME1,CDV3      | 111,70553                                 | 115,16838  | 121,444185 | 101,334735 | 123,074455 | 130,02768  | 66,67329   | 60,215145  | 75,13423   | 77,35806  | 80,18045   | 75,344735  |
| ID13892         | ACL6A,IF4A1,HNRPF     | 135,09347                                 | 141,983725 | 136,327515 | 163,02464  | 156,33716  | 155,69761  | 179,51714  | 148,353835 | 164,616595 | 111,25791 | 118,072745 | 109,850905 |
| ID651           | ACPH                  | 110,674885                                | 125,908705 | 117,607055 | 111,16107  | 113,738295 | 118,55773  | 68,132545  | 95,18738   | 81,54194   | 66,29675  | 72,930445  | 70,297855  |
| ID1114          | ACTB                  | 119,045045                                | 101,45345  | 122,71457  | 86,604115  | 74,310005  | 66,790465  | 165,03791  | 188,885555 | 167,619065 | 164,34858 | 126,1945   | 112,739915 |
| ID1070          | ACTB                  | 114,797295                                | 115,92455  | 121,190745 | 124,20143  | 102,403455 | 102,715765 | 86,439305  | 84,954845  | 89,305855  | 90,99874  | 96,560005  | 95,599585  |
| ID3255127       | ACTG                  | 92,039815                                 | 91,247385  | 92,56812   | 102,803955 | 79,7036    | 90,54841   | 81,39246   | 61,43024   | 63,371945  | 119,57176 | 74,44322   | 91,77801   |
| ID1067          | ACTG                  | 98,787155                                 | 96,29072   | 86,91779   | 85,56691   | 128,727165 | 81,45378   | 95,13788   | 95,59521   | 94,95239   | 40,09193  | 91,74688   | 104,67174  |
| ID1074          | ACTG                  | 67,425435                                 | 68,75858   | 73,25127   | 98,421175  | 99,354425  | 105,823015 | 71,584605  | 73,053075  | 68,6988    | 91,51088  | 83,33608   | 91,13239   |
| ID360270        | ACTG,ACTB             | 120,39944                                 | 114,79356  | 138,84618  | 99,478525  | 83,90349   | 70,557745  | 54,132895  | 81,26083   | 45,08136   | 98,16308  | 64,370965  | 60,6808    |
| ID209100        | ACTG,ACTB             | 91,790225                                 | 78,60895   | 99,047455  | 73,48615   | 65,5567    | 74,75669   | 29,62944   | 3,14729    | 17,755585  | 51,97919  | 47,170155  | 48,704125  |
| ID1008          | ACTG,ACTB             | 116,727295                                | 117,34665  | 131,352825 | 124,09166  | 103,249095 | 135,52755  | 103,444125 | 107,958145 | 107,216935 | 92,94628  | 80,289215  | 86,652305  |
| ID1073          | ACTG,ACTB             | 30,35926                                  | 32,209565  | 35,372305  | 84,587225  | 74,45414   | 98,67245   | 52,85941   | 47,703035  | 46,383105  | 91,04608  | 61,559005  | 64,1947    |
| ID1055          | ACTG,IF34             | 67,595235                                 | 75,161285  | 62,132555  | 145,82536  | 94,56551   | 78,73915   | 70,44114   | 111,226575 | 115,020135 | 117,42206 | 118,28154  | 101,66423  |
| ID420           | ACTG,ITA3             | 104,967375                                | 111,30103  | 109,34333  | 107,132515 | 115,317615 | 123,67495  | 97,53957   | 86,81829   | 92,08713   | 138,44188 | 88,32583   | 92,923995  |
| ID1034          | ACTG,K1C18            | 98,98775                                  | 103,048915 | 109,55228  | 96,58122   | 94,111645  | 108,484025 | 157,47854  | 149,445085 | 143,937095 | 83,78375  | 79,85701   | 74,247615  |
| ID1064          | ACTG,K1C18,ACTB       | 100,372195                                | 95,29378   | 87,48099   | 87,44067   | 130,167835 | 85,364765  | 102,38816  | 104,31595  | 104,153215 | 69,66777  | 95,69628   | 105,169695 |
| ID1080          | ACTG,K1C18,ACTB       | 136,81236                                 | 144,457625 | 144,607915 | 129,20401  | 116,69489  | 116,7168   | 102,417365 | 102,646195 | 91,92182   | 79,06768  | 68,78114   | 75,930405  |
| ID1035          | ACTG,K1C18,CHD9       | 153,08116                                 | 163,161045 | 169,448915 | 130,627775 | 115,87038  | 115,567965 | 179,763815 | 191,35154  | 152,22413  | 91,14517  | 82,49422   | 81,313335  |
| ID1053          | ACTG,M6PBP            | 69,607395                                 | 68,490365  | 67,192605  | 88,57011   | 91,81142   | 100,5113   | 65,02444   | 63,441405  | 61,147785  | 78,34205  | 76,09358   | 76,949415  |
| ID1478          | ACTG,NMNT,CLIC4       | 91,397815                                 | 101,53196  | 103,726495 | 76,432575  | 87,727105  | 101,72447  | 109,40965  | 140,624935 | 120,852315 | 213,25293 | 97,55573   | 92,25573   |
| ID1227          | ACTG,PP2AB            | 107,115915                                | 115,53131  | 111,34801  | 118,92167  | 98,315115  | 115,07728  | 77,794475  | 73,206635  | 78,728595  | 89,45868  | 88,628085  | 86,53644   |
| ID14770         | ACTG,SET              | 42,869405                                 | 47,49576   | 44,297885  | 93,60357   | 84,69448   | 93,89303   | 62,695645  | 60,87807   | 55,236175  | 81,85278  | 68,61775   | 72,515445  |
| ID8247          | ACTN4                 | 105,447385                                | 109,45465  | 107,49588  | 144,87208  | 158,033905 | 137,002435 | 78,35333   | 57,754575  | 59,657675  | 49,49417  | 76,701525  | 75,6417    |
| ID517           | ACTN4                 | 80,792015                                 | 82,643665  | 86,575755  | 103,41759  | 104,712145 | 107,1561   | 57,737045  | 54,81945   | 53,03088   | 59,86058  | 61,649855  | 69,39307   |
| ID518           | ACTN4,ERO1A           | 105,99698                                 | 109,36112  | 111,59853  | 125,46613  | 122,74742  | 106,652125 | 62,475295  | 57,481755  | 60,46805   | 58,75529  | 64,750735  | 73,820535  |
| ID507           | ACTN4,HS105           | 121,141285                                | 120,70519  | 126,96749  | 135,090325 | 136,99573  | 110,02421  | 62,66819   | 57,63865   | 60,728025  | 58,94369  | 66,22891   | 73,355955  |
| ID8700          | ACTN4,MVP             | 153,62179                                 | 132,36322  | 143,315135 | 50,686505  | 43,84603   | 85,17763   | 70,8429    | 90,83199   | 65,92449   | 20,23373  | 30,19142   | 45,755465  |
| ID1047          | ADRM1,ACTG,TMOD3,ATPB | 90,26858                                  | 106,59496  | 109,499605 | 156,37931  | 143,79252  | 128,19672  | 76,75899   | 67,67029   | 60,72272   | 105,20716 | 92,92917   | 97,20383   |
| ID467907        | AGM1                  | 92,48203                                  | 97,6184    | 95,47238   | 136,318975 | 95,29444   | 155,46808  | 97,438655  | 96,082995  | 106,879155 | 119,70884 | 101,571735 | 104,357725 |
| ID1077          | AHSA1,ACTG,CSN4       | 113,359215                                | 120,804145 | 124,83158  | 135,16834  | 111,803955 | 107,73788  | 63,97355   | 63,61545   | 77,83914   | 100,56131 | 84,05431   | 88,39943   |
| ID169714        | AIBP,C1032            | 116,272925                                | 116,47616  | 127,276675 | 110,762045 | 122,49475  | 123,885455 | 71,661415  | 82,64155   | 83,706505  | 86,19316  | 83,431065  | 91,61101   |
| ID894           | AL1B1                 | 75,661075                                 | 82,641315  | 83,075895  | 113,56278  | 101,650555 | 103,65787  | 63,32164   | 53,35733   | 68,650025  | 9,772045  | 88,1461    | 94,422635  |
| ID939           | AL9A1                 | 111,34244                                 | 120,0291   | 113,62564  | 136,101895 | 136,745185 | 147,658415 | 65,177705  | 68,173475  | 77,06819   | 65,07484  | 83,42511   | 88,097555  |
| ID1386          | ALBU                  | 121,9733                                  | 133,299515 | 134,950155 | 129,42683  | 124,975845 | 116,95644  | 66,129995  | 82,443485  | 81,248885  | 82,4658   | 82,31701   | 77,699885  |
| ID1828633       | ALDOA                 | 174,31809                                 | 95,551085  | 152,082475 | 57,58039   | 51,478315  | 49,50115   | 256,804925 | 310,91157  | 271,38924  | 200,84968 | 179,920235 | 120,50965  |
| ID2003479       | AN32A                 | 87,95697                                  | 89,944265  | 95,561025  | 86,87064   | 108,04136  | 57,90857   | 29,696785  | 64,851945  | 61,72417   | 93,38261  | 61,050715  | 59,357695  |
| ID3661699       | ANXA1,DCPS            | 62,945855                                 | 74,966975  | 73,17148   | 129,504795 | 106,80768  | 117,86464  | 85,56156   | 84,711825  | 66,391565  | 95,046    | 73,873325  | 71,37444   |
| ID2588249       | ANXA2,NACA            | 178,926025                                | 296,538395 | 92,903685  | 106,563215 | 93,953675  | 106,28719  | 33,303035  | 61,541355  | 98,414315  | 72,85427  | 72,94783   | 63,92224   |
| ID1351          | ANXA3,CAPZB,IPYR      | 123,20518                                 | 134,675695 | 131,561745 | 136,733215 | 132,39348  | 122,598085 | 76,73548   | 78,09211   | 79,666015  | 79,51955  | 84,43618   | 90,808865  |
| ID1293          | ANXA3,IPYR            | 114,39635                                 | 122,044755 | 121,3162   | 123,454015 | 119,378115 | 122,04876  | 116,6875   | 115,385745 | 116,81648  | 110,16942 | 85,61138   | 90,877635  |
| ID1343          | ANXA4                 | 129,415995                                | 136,974375 | 141,16159  | 127,959615 | 123,699505 | 114,90777  | 133,77147  | 160,1581   | 143,856265 | 146,04996 | 94,30994   | 92,49936   |
| ID1334          | ANXA5                 | 99,50621                                  | 102,37519  | 114,944915 | 78,842095  | 83,509185  | 92,583725  | 117,45996  | 113,61239  | 123,127855 | 87,41981  | 70,387995  | 68,80215   |
| ID213992        | ANXA5                 | 98,84342                                  | 109,704125 | 100,98105  | 115,251765 | 112,42314  | 116,65547  | 57,796965  | 67,78417   | 73,48931   | 69,38365  | 70,488615  | 66,2952    |
| ID1345          | ANXA5,SFRS2           | 43,510995                                 | 43,1422    | 53,579875  | 55,62829   | 63,885405  | 86,698595  | 87,85766   | 89,655625  | 88,914375  | 108,31569 | 79,491325  | 74,111725  |
| ID978           | APMAP,SNX6            | 100,26037                                 | 103,9828   | 122,580095 | 120,0283   | 122,98922  | 112,89155  | 120,64579  | 101,149555 | 130,48525  | 95,96083  | 85,63032   | 81,347015  |
| ID341707        | APT                   | 69,088775                                 | 72,87946   | 84,173305  | 532,134375 | 153,542665 | 133,72962  | 7,70409    | 11,66579   | 14,6401    | 122,92756 | 129,00311  | 131,9219   |
| ID1569          | APT                   | 136,636765                                | 148,4242   | 152,00712  | 133,638285 | 116,35277  | 115,57886  | 93,09067   | 104,107175 | 107,52269  | 107,19462 | 94,097705  | 92,70482   |
| ID965           | ARP3                  | 113,070245                                | 117,56086  | 116,06469  | 145,83567  | 136,58162  | 130,859235 | 66,919345  | 59,205315  | 70,222725  | 60,48846  | 71,148185  | 78,017115  |

Table S-1

|                 |                         | Median of normalized volumes <sup>13</sup> |            |            |            |            |            |            |            |            |            |            |            |
|-----------------|-------------------------|--------------------------------------------|------------|------------|------------|------------|------------|------------|------------|------------|------------|------------|------------|
| ID <sup>1</sup> | Protein <sup>2</sup>    | co_0 min                                   | co_30 min  | co_60 min  | co_24 h    | co_48 h    | co_72 h    | PI_0 min   | PI_30 min  | PI_60 min  | PI_24 h    | PI_48 h    | PI_72 h    |
| ID3329884       | ARP3,TADBP              | 7,431215                                   | 29,406965  | 38,207135  | 81,171965  | 67,00959   | 74,255215  | 411,49689  | 255,054145 | 211,04777  | 132,89043  | 101,24879  | 92,013885  |
| ID1046          | ARP3,TADBP              | 76,13053                                   | 91,509395  | 86,37988   | 101,16411  | 104,159365 | 128,82713  | 117,585435 | 108,47282  | 104,54741  | 80,24286   | 72,368795  | 72,402135  |
| ID1152          | ARSA1                   | 111,261865                                 | 111,84274  | 122,934625 | 106,976005 | 116,536795 | 116,683145 | 59,673215  | 52,571335  | 68,09929   | 73,11252   | 80,737515  | 78,141835  |
| ID1560          | ATP5B,CBX5              | 94,912795                                  | 108,563165 | 99,842455  | 99,38217   | 97,92969   | 99,40477   | 134,91678  | 108,884015 | 139,263585 | 127,1413   | 91,61694   | 88,342425  |
| ID3737          | ATPB                    | 90,630255                                  | 98,14623   | 86,89253   | 87,113775  | 87,288065  | 90,00916   | 78,79455   | 78,30762   | 90,03048   | 135,2042   | 89,662235  | 86,043835  |
| ID48368         | BASP                    | 89,43558                                   | 139,240845 | 75,352395  | 125,588265 | 132,23631  | 167,82339  | 20,024455  | 1,378435   | 7,7186     | 39,74228   | 65,55506   | 56,63564   |
| ID936           | BASP                    | 102,15652                                  | 133,72475  | 104,46685  | 142,32019  | 173,256145 | 138,77479  | 59,244045  | 39,698055  | 59,19063   | 76,22659   | 87,33546   | 92,75009   |
| ID2010414       | BCCIP,ACTG              | 85,658335                                  | 102,710555 | 79,659555  | 107,986    | 155,148825 | 165,64524  | 71,654415  | 73,602815  | 75,843175  | 77,44378   | 103,695105 | 68,395235  |
| ID1596          | BID,RBM8A               | 101,157275                                 | 117,78074  | 100,879155 | 154,1472   | 127,505955 | 110,115335 | 98,850585  | 69,63507   | 72,607965  | 72,64713   | 83,71618   | 55,405975  |
| ID1183          | BIEA,TALDO              | 95,855145                                  | 107,006315 | 101,694085 | 112,80782  | 109,50053  | 107,0155   | 82,452995  | 90,710355  | 83,93705   | 83,39726   | 81,79053   | 87,386745  |
| ID951           | BLMH,LA,PA2G4           | 112,21182                                  | 122,85627  | 118,55186  | 120,20284  | 111,819225 | 120,625565 | 72,72389   | 81,05263   | 74,8677    | 68,05314   | 82,124965  | 84,806655  |
| ID1363          | C1QBP                   | 93,646195                                  | 105,01945  | 99,1404    | 93,1786    | 89,56901   | 86,34525   | 92,935285  | 89,055315  | 109,64179  | 89,43267   | 90,24653   | 89,737625  |
| ID1354          | C1QBP                   | 86,262595                                  | 100,725705 | 85,481795  | 118,6061   | 107,718445 | 113,021425 | 89,857995  | 76,882435  | 83,81682   | 84,86429   | 75,940905  | 77,9249    |
| ID488759        | CALD1                   | 108,278785                                 | 115,594385 | 114,709345 | 151,948465 | 166,440635 | 143,75288  | 72,989075  | 65,58606   | 86,825125  | 912,817445 | 70,317645  | 80,763545  |
| ID1702          | CALM                    | 144,750755                                 | 142,272545 | 196,118    | 103,865775 | 104,25972  | 105,253535 | 111,610595 | 451,18055  | 170,125345 | 105,06413  | 87,68575   | 91,3685    |
| ID2174          | CALR                    | 88,89839                                   | 94,143675  | 90,37074   | 71,348345  | 76,74707   | 88,812945  | 92,489985  | 96,61487   | 100,901525 | 103,23889  | 90,310635  | 82,41663   |
| ID831           | CALR                    | 100,3225                                   | 109,943195 | 105,60792  | 84,763995  | 90,08078   | 102,90512  | 113,82303  | 114,618445 | 121,930695 | 106,41295  | 90,08304   | 80,055615  |
| ID745           | CALR,KAP0               | 132,967545                                 | 89,222035  | 110,12773  | 57,10753   | 50,25332   | 52,04415   | 249,335165 | 232,62972  | 249,314635 | 205,58277  | 184,166095 | 134,7817   |
| ID897           | CALR,NP1L1              | 77,30268                                   | 84,13628   | 76,926875  | 78,783175  | 91,102765  | 109,589085 | 77,384905  | 75,722675  | 83,75862   | 93,63933   | 87,66965   | 91,780805  |
| ID925           | CALR,TBB2C              | 90,236555                                  | 102,269115 | 93,182835  | 86,17494   | 92,68315   | 106,089175 | 85,299285  | 88,86317   | 94,208725  | 99,91644   | 79,906195  | 84,38399   |
| ID2006762       | CALU                    | 131,90107                                  | 160,61074  | 113,155685 | 125,703475 | 361,623485 | 185,610255 | 55,06583   | 55,25619   | 69,6157    | 31,61237   | 9,272725   | 31,59375   |
| ID54018         | CALU                    | 73,039995                                  | 85,10613   | 73,20304   | 84,805665  | 87,403155  | 119,47833  | 79,58905   | 77,304305  | 88,19899   | 101,90479  | 61,061495  | 62,25916   |
| ID53317         | CALU                    | 68,39457                                   | 77,98631   | 70,25559   | 74,501575  | 80,19322   | 117,666735 | 74,495625  | 72,42241   | 77,91629   | 104,61575  | 65,45907   | 74,43177   |
| ID1024          | CALU                    | 79,533165                                  | 92,47806   | 78,905295  | 84,125095  | 87,910255  | 110,21043  | 84,63079   | 77,75105   | 88,86502   | 110,32053  | 74,5384    | 83,13767   |
| ID1027          | CALU,ACTG               | 87,46535                                   | 100,33167  | 89,160605  | 78,4288    | 91,5432    | 124,496575 | 89,807705  | 89,79329   | 95,7084    | 113,69301  | 76,472005  | 84,447485  |
| ID1037          | CALU,ACTG               | 94,136675                                  | 111,832455 | 95,16477   | 94,4831    | 101,503825 | 102,56451  | 87,060205  | 87,060205  | 108,59487  | 130,63919  | 92,50638   | 94,71852   |
| ID479360        | CAP2                    | 89,209255                                  | 93,9242    | 107,47995  | 94,151685  | 99,326895  | 99,25567   | 105,34914  | 102,367565 | 120,713295 | 0          | 82,120285  | 86,134245  |
| ID496907        | CAPG                    | 96,244265                                  | 108,116155 | 111,70219  | 140,647435 | 126,128155 | 154,289405 | 48,730405  | 51,22292   | 53,478875  | 55,47173   | 70,738865  | 63,568025  |
| ID1106          | CAPG                    | 102,137345                                 | 116,431555 | 108,36414  | 113,43871  | 115,91302  | 123,4474   | 76,266095  | 70,222935  | 81,549555  | 79,83099   | 84,30171   | 90,333885  |
| ID1440          | CAPZB                   | 107,60373                                  | 121,140435 | 115,69242  | 123,671385 | 125,47666  | 132,855035 | 86,451895  | 87,34504   | 96,597605  | 102,4815   | 85,179945  | 83,141005  |
| ID1512          | CATB                    | 154,356845                                 | 107,271995 | 140,150125 | 98,02715   | 87,71859   | 93,47577   | 273,2966   | 362,5067   | 318,674235 | 188,69923  | 137,326105 | 106,162765 |
| ID152055        | CATD,CLIC1              | 104,374905                                 | 113,82983  | 114,26925  | 87,19919   | 129,942165 | 143,75756  | 100,785015 | 102,60089  | 114,50027  | 79,25228   | 102,20238  | 102,18715  |
| ID1204          | CAZA1,NPM               | 94,428665                                  | 102,919515 | 99,26126   | 113,728325 | 99,017555  | 102,74606  | 83,31348   | 79,96957   | 81,270655  | 88,57521   | 84,01674   | 89,314095  |
| ID17135         | CAZA2                   | 105,11475                                  | 116,78941  | 112,503885 | 120,343655 | 115,926345 | 102,243955 | 85,58128   | 86,98721   | 89,57414   | 88,19298   | 84,444805  | 84,454555  |
| ID163898        | CBX1                    | 93,215055                                  | 104,789565 | 93,012215  | 134,625765 | 116,237895 | 119,545995 | 119,528695 | 83,13456   | 86,976355  | 92,68008   | 81,923875  | 76,83239   |
| ID1547          | CBX1                    | 56,62253                                   | 68,34873   | 70,256205  | 134,28403  | 120,640235 | 118,39233  | 51,51179   | 31,806315  | 38,771245  | 92,27438   | 94,91418   | 104,72887  |
| ID1618          | CBX3                    | 72,208945                                  | 100,497555 | 78,154525  | 102,639545 | 119,05052  | 114,346255 | 34,85149   | 17,606205  | 22,09393   | 10,53659   | 26,017005  | 18,93456   |
| ID3270147       | CBX5,CATB               | 103,799235                                 | 120,642695 | 104,428625 | 76,704825  | 84,070785  | 129,937355 | 118,785705 | 95,962415  | 94,111935  | 86,00869   | 137,641945 | 113,6269   |
| ID1530          | CBX5,CATB               | 117,231465                                 | 119,9153   | 118,43505  | 124,704685 | 124,870335 | 131,65322  | 140,38517  | 148,577535 | 156,16844  | 67,13026   | 82,238015  | 72,87787   |
| ID941           | CD2B2                   | 97,13261                                   | 113,797295 | 102,233935 | 107,905815 | 123,269395 | 107,06249  | 62,8173    | 50,058995  | 67,98124   | 73,74442   | 60,18159   | 58,71192   |
| ID958           | CDC37,PRS6B,DCTN2,PDIA6 | 103,457955                                 | 113,996025 | 112,08284  | 118,285485 | 111,37668  | 109,321885 | 70,91879   | 66,850225  | 72,371105  | 77,16692   | 78,846555  | 80,47092   |
| ID827           | CH60                    | 69,075915                                  | 74,129985  | 73,016465  | 78,514925  | 77,69317   | 83,19507   | 82,523445  | 82,092315  | 102,95863  | 113,34766  | 98,05541   | 94,690205  |
| ID14100         | CH60                    | 90,71302                                   | 97,21192   | 94,1139    | 104,82316  | 97,240775  | 100,333255 | 85,258595  | 81,608985  | 87,255565  | 97,80907   | 96,477565  | 93,835465  |
| ID826           | CH60,STK3               | 72,4893                                    | 66,440935  | 78,854895  | 92,07595   | 85,39417   | 99,49253   | 110,842735 | 113,62821  | 123,817905 | 124,66712  | 101,05925  | 91,53991   |
| ID783           | CH60,TBAK,ACTB,HNRPK    | 102,079445                                 | 100,95122  | 97,058375  | 99,31262   | 98,454305  | 94,418835  | 104,049515 | 99,99538   | 103,065085 | 111,6302   | 100,98178  | 100,27718  |
| ID1268          | CHM4B,RPB3              | 101,04462                                  | 113,51302  | 106,531975 | 120,894105 | 117,576335 | 105,915895 | 80,291835  | 73,03954   | 78,92447   | 99,67449   | 93,53243   | 88,590905  |
| ID3763000       | CHM4B,RPB3              | 77,41477                                   | 88,20882   | 72,886755  | 118,494165 | 128,44789  | 106,040315 | 86,27229   | 73,629985  | 73,299765  | 91,27134   | 94,04571   | 82,64234   |
| ID2212082       | CHP1                    | 79,845315                                  | 95,152035  | 79,20624   | 123,63509  | 120,938245 | 130,05337  | 92,67368   | 70,57802   | 76,05167   | 17,73311   | 75,55471   | 56,306195  |
| ID1479          | CI032                   | 109,279115                                 | 112,503875 | 121,858285 | 126,11289  | 128,18463  | 129,51848  | 74,98522   | 86,62129   | 88,460145  | 97,46721   | 91,584615  | 106,042085 |
| ID1378          | CLIC1                   | 122,674045                                 | 130,871615 | 134,21456  | 134,52677  | 128,13082  | 123,94757  | 58,18018   | 71,41566   | 76,815975  | 92,34422   | 86,21744   | 95,272815  |
| ID1318          | CLIC4,PPIE              | 88,29241                                   | 103,373755 | 91,0456    | 115,828605 | 110,32626  | 111,663415 | 105,64171  | 98,26085   | 101,21551  | 80,16291   | 88,00653   | 88,445485  |
| ID909           | CNDP2,HNRH1             | 113,120755                                 | 122,587005 | 120,50033  | 131,25651  | 134,838705 | 128,11857  | 70,30758   | 68,366885  | 67,112135  | 65,25281   | 66,455075  | 71,228855  |
| ID3392731       | CNDP2,PEPD              | 108,340715                                 | 113,07423  | 112,529885 | 117,330455 | 107,907405 | 125,127015 | 71,750165  | 54,892025  | 72,7578    | 82,41157   | 84,4601    | 85,00046   |
| ID901           | CNDP2,PEPD              | 110,853115                                 | 115,116135 | 113,45779  | 116,62858  | 120,169585 | 121,210175 | 77,20618   | 75,656265  | 82,52091   | 71,78713   | 71,968725  | 75,692855  |
| ID1168          | CNN3                    | 97,015395                                  | 107,11035  | 100,653755 | 143,497215 | 122,86517  | 115,64696  | 78,71123   | 70,2695    | 71,361435  | 89,66518   | 85,359095  | 92,37834   |
| ID1165          | CNN3                    | 88,919775                                  | 94,835535  | 96,582815  | 134,10254  | 126,560765 | 108,960685 | 76,16567   | 61,54912   | 58,51474   | 86,47401   | 78,67127   | 87,59172   |
| ID1154          | CNN3,IDH3A              | 113,43605                                  | 128,69911  | 114,59791  | 131,9018   | 110,24202  | 114,776885 | 74,215625  | 66,813525  | 73,386685  | 67,66917   | 85,848465  | 86,9083    |

Table S-1

| ID <sup>1</sup> | Protein <sup>2</sup>          | Median of normalized volumes <sup>3</sup> |            |            |            |            |            |            |            |            |            |            |            |
|-----------------|-------------------------------|-------------------------------------------|------------|------------|------------|------------|------------|------------|------------|------------|------------|------------|------------|
|                 |                               | co_0 min                                  | co_30 min  | co_60 min  | co_24 h    | co_48 h    | co_72 h    | PI_0 min   | PI_30 min  | PI_60 min  | PI_24 h    | PI_48 h    | PI_72 h    |
| ID1641          | COF1                          | 122,447965                                | 126,15801  | 118,001095 | 140,78635  | 133,709505 | 134,622725 | 46,774995  | 47,800235  | 62,965135  | 82,61509   | 55,289885  | 62,043005  |
| ID1341          | COPE, ANXA5                   | 137,825305                                | 142,317385 | 135,95785  | 120,080265 | 119,34753  | 129,65528  | 167,76136  | 172,11798  | 152,736225 | 102,0077   | 92,33481   | 92,19387   |
| ID295167        | COPE, ANXA5                   | 89,24158                                  | 93,5597    | 97,685625  | 84,91864   | 78,547155  | 81,87899   | 84,80662   | 75,223485  | 89,849425  | 68,51585   | 56,224885  | 56,44962   |
| ID235608        | COR1B                         | 102,098415                                | 94,58964   | 97,15092   | 108,968995 | 120,980055 | 142,204345 | 131,718105 | 119,26388  | 115,27618  | 112,94874  | 131,883405 | 107,02121  |
| ID693           | COR1B, CBR4                   | 96,81786                                  | 92,74887   | 85,276405  | 79,00085   | 54,756955  | 73,971875  | 112,35536  | 87,414855  | 91,269195  | 115,88104  | 130,413675 | 132,722105 |
| ID1769          | COTL1                         | 105,52968                                 | 115,130865 | 111,996685 | 112,368385 | 97,647655  | 95,515805  | 55,98173   | 57,35926   | 69,30251   | 87,10998   | 74,627015  | 88,691575  |
| ID791           | CPNE1                         | 110,407575                                | 114,49396  | 113,217375 | 129,20151  | 124,30859  | 130,5958   | 111,926175 | 115,44013  | 110,03673  | 74,87359   | 88,378495  | 85,57913   |
| ID668           | CPNE1, GRP75, PDIA4           | 109,50864                                 | 110,40697  | 110,982535 | 95,7526    | 81,8089    | 111,75223  | 121,18884  | 125,2212   | 125,793005 | 124,48206  | 100,833235 | 96,435545  |
| ID808           | CPNE3, CPNE1, PDIA3           | 81,12023                                  | 83,426965  | 86,307905  | 106,79141  | 97,66413   | 106,74998  | 89,936945  | 90,96556   | 93,538025  | 100,19078  | 101,31261  | 91,02602   |
| ID1467          | CPNS1                         | 69,94976                                  | 83,301215  | 93,564525  | 112,464335 | 107,467165 | 100,76896  | 56,012215  | 92,041025  | 72,098525  | 96,12463   | 82,731155  | 88,772765  |
| ID2001699       | CPNS1                         | 123,133295                                | 128,41244  | 142,871835 | 128,10456  | 135,79822  | 155,87696  | 83,659095  | 98,146975  | 87,231145  | 105,20288  | 107,35467  | 120,172265 |
| ID1401          | CPNS1, GDIR                   | 103,723145                                | 114,38368  | 110,269175 | 109,449935 | 103,160815 | 105,499375 | 58,30643   | 64,76687   | 75,643815  | 72,40659   | 63,37635   | 65,763465  |
| ID1502          | CRK                           | 184,941395                                | 130,164075 | 172,626375 | 117,485915 | 90,30303   | 75,37607   | 288,345755 | 352,225805 | 311,838755 | 219,90246  | 134,48107  | 107,222015 |
| ID565           | CSDE1                         | 97,50041                                  | 123,628705 | 102,050485 | 202,987585 | 164,18274  | 126,45567  | 72,121025  | 65,81105   | 80,66749   | 0          | 78,86991   | 68,4132    |
| ID17270         | CSN4                          | 110,767805                                | 116,869365 | 119,56591  | 113,37669  | 115,34023  | 121,015455 | 69,724985  | 58,34468   | 67,095035  | 78,6539    | 81,38041   | 93,596115  |
| ID1099          | CSN4, MPI, BPNT1              | 120,041935                                | 126,385355 | 130,64259  | 128,74411  | 125,40209  | 116,78026  | 99,447705  | 76,57623   | 96,227375  | 123,45649  | 94,644325  | 95,94652   |
| ID1723          | CTO77                         | 42,13797                                  | 48,747915  | 46,449035  | 111,380025 | 138,44968  | 115,063855 | 50,73928   | 44,80194   | 62,962635  | 10,40025   | 85,858855  | 81,48284   |
| ID26959         | CTNA1                         | 72,240745                                 | 79,18698   | 93,594185  | 132,814545 | 116,886705 | 125,94826  | 38,98242   | 33,24885   | 32,153585  | 0          | 33,45652   | 46,865125  |
| ID650           | DC112                         | 108,100625                                | 115,99056  | 108,17547  | 137,97351  | 126,793725 | 127,10919  | 80,43997   | 76,82725   | 77,8103    | 65,73129   | 65,312335  | 69,094915  |
| ID327583        | DC112                         | 80,10508                                  | 85,900285  | 77,48305   | 93,34278   | 99,389015  | 104,45233  | 72,3791    | 67,333315  | 68,198715  | 92,96388   | 72,002815  | 69,91419   |
| ID586647        | DC1L2, TCPB                   | 101,25123                                 | 107,1211   | 106,636975 | 143,934275 | 145,02769  | 127,574655 | 87,47939   | 85,72358   | 87,229155  | 41,16627   | 95,70171   | 97,209815  |
| ID380472        | DCTN1                         | 80,007325                                 | 44,55774   | 76,046225  | 49,31849   | 29,241365  | 24,3214    | 197,041805 | 176,29227  | 207,22101  | 211,82989  | 209,285485 | 162,22811  |
| ID942           | DCTN2, PABP2                  | 114,5817                                  | 128,771175 | 124,774395 | 117,909095 | 117,311075 | 119,512325 | 88,644505  | 86,514885  | 85,35819   | 95,30879   | 88,051005  | 87,664525  |
| ID302775        | DCTN2, PABP2, PRS6A           | 103,73667                                 | 110,88813  | 107,852545 | 120,39203  | 109,235655 | 107,460625 | 67,89339   | 64,650795  | 67,34142   | 87,90626   | 76,3999    | 78,899915  |
| ID3348523       | DCUP                          | 109,924465                                | 125,08233  | 119,65323  | 139,442535 | 110,65436  | 144,266435 | 72,72302   | 67,37775   | 76,700145  | 70,21872   | 94,097335  | 95,417735  |
| ID902           | DD19A, MPPA                   | 100,025035                                | 111,64799  | 105,62513  | 141,675975 | 132,19846  | 131,207725 | 84,41124   | 81,29284   | 87,99673   | 31,94169   | 70,33323   | 73,385305  |
| ID893           | DD19A, TBG1, PPP5             | 123,93303                                 | 130,411945 | 138,83092  | 151,98327  | 139,093735 | 132,55551  | 89,348775  | 85,70972   | 94,527055  | 24,68736   | 99,50442   | 108,41284  |
| ID1259          | DDAH1, CAZA1, LDHB, RLA0, NPM | 78,808115                                 | 79,725665  | 86,885115  | 88,49741   | 87,77109   | 94,417635  | 50,503715  | 54,01715   | 53,13177   | 96,73163   | 79,163725  | 88,53064   |
| ID1188          | DDAH1, EIF3I, NPM             | 97,58566                                  | 99,13237   | 100,52592  | 107,006555 | 94,987265  | 95,62854   | 122,433025 | 121,28745  | 109,0216   | 86,93099   | 84,467795  | 96,192215  |
| ID442           | DDB1                          | 91,59023                                  | 88,270455  | 100,536145 | 116,818305 | 115,9555   | 114,586515 | 94,7544    | 94,84224   | 86,94462   | 78,58566   | 82,01561   | 80,350195  |
| ID129069        | DDB1                          | 75,71036                                  | 70,785965  | 79,71095   | 95,67477   | 98,749875  | 113,357385 | 87,91904   | 87,616485  | 80,488915  | 84,58425   | 81,54952   | 75,501845  |
| ID436           | DDB1, OXRP                    | 105,00318                                 | 104,372165 | 115,524155 | 127,414485 | 123,54466  | 112,987965 | 98,7828    | 95,867665  | 90,46452   | 77,18807   | 80,522605  | 77,383185  |
| ID1169          | DJB11, ROAA                   | 119,08758                                 | 128,80379  | 133,14005  | 137,754385 | 124,398745 | 119,650885 | 89,986795  | 95,74221   | 86,730845  | 106,715505 | 91,203545  | 98,02503   |
| ID445851        | DNJA2, APMAP, SNX6            | 81,55171                                  | 89,722125  | 82,35027   | 100,934595 | 87,98128   | 87,86359   | 69,182995  | 59,75365   | 60,661625  | 74,52982   | 72,24221   | 69,816445  |
| ID983           | DNJA2, APMAP, SNX6            | 70,682985                                 | 76,173765  | 68,306085  | 119,12082  | 114,43119  | 106,67182  | 66,54961   | 58,28902   | 59,6025    | 78,18022   | 77,76392   | 76,71447   |
| ID1319          | DNJC9                         | 110,246425                                | 139,303495 | 126,70546  | 139,43806  | 120,329435 | 123,72683  | 71,260165  | 89,378035  | 74,82667   | 64,0006    | 84,812295  | 84,61293   |
| ID435879        | DNJC9, PSME3                  | 118,54565                                 | 127,88479  | 131,58246  | 105,26744  | 92,945145  | 83,908875  | 92,296855  | 95,62815   | 99,78669   | 91,74561   | 74,820875  | 76,235115  |
| ID122740        | DP13B                         | 13,983775                                 | 20,98784   | 19,04432   | 72,27588   | 45,579005  | 91,71344   | 12,62676   | 13,90738   | 13,924005  | 296,10633  | 75,4305    | 121,36523  |
| ID410           | DPOD2                         | 96,308125                                 | 111,04463  | 92,28487   | 141,04441  | 134,55087  | 144,36593  | 55,268495  | 36,683605  | 30,929215  | 31,18429   | 42,03278   | 57,263445  |
| ID244116        | DPOD2                         | 99,32258                                  | 108,970225 | 96,57548   | 147,83193  | 159,780005 | 174,500725 | 51,72215   | 31,471715  | 22,97198   | 0,02609    | 13,76593   | 35,37919   |
| ID13335         | DPOD2                         | 95,461415                                 | 93,798985  | 93,336795  | 156,183345 | 191,094315 | 211,235135 | 94,80849   | 87,697585  | 117,714785 | 65,59947   | 94,2679    | 96,524465  |
| ID755           | DPYL2                         | 152,27617                                 | 101,429235 | 122,8146   | 57,355415  | 49,864715  | 52,102165  | 280,09564  | 293,87282  | 280,448965 | 208,70962  | 189,265175 | 138,3486   |
| ID778           | DPYL2, LKHA4                  | 90,53427                                  | 104,96045  | 92,914925  | 137,670865 | 121,28035  | 112,41734  | 73,53944   | 67,08022   | 73,738195  | 14,64969   | 91,15042   | 95,844     |
| ID644           | DPYL2, ZYX, EZRI, CALD1, IMMT | 56,551265                                 | 61,491265  | 63,334795  | 101,55699  | 83,852655  | 93,777785  | 46,034635  | 43,031855  | 47,401195  | 194,75407  | 67,490895  | 80,445025  |
| ID624           | DPYL2, ZYX, EZRI, CALD1, IMMT | 90,85454                                  | 94,665105  | 94,371205  | 115,66195  | 114,71292  | 123,993825 | 92,00611   | 70,524     | 90,020855  | 0          | 81,28126   | 86,09103   |
| ID435           | DREB                          | 95,156995                                 | 102,19118  | 94,108595  | 127,08493  | 108,647875 | 108,51848  | 66,5076    | 48,721645  | 56,30049   | 62,14855   | 72,556135  | 73,305815  |
| ID381           | DYNA                          | 113,64283                                 | 115,255485 | 111,092355 | 133,363095 | 153,27024  | 148,456245 | 69,02119   | 55,24977   | 61,75276   | 55,04345   | 83,405095  | 73,482775  |
| ID1352          | ECH1, PSDE                    | 113,253425                                | 119,960115 | 123,75728  | 103,930065 | 121,859765 | 140,21971  | 123,98558  | 118,136165 | 128,0928   | 65,68563   | 86,89513   | 72,495525  |
| ID1435          | ECHM                          | 110,33824                                 | 121,868355 | 117,331375 | 130,32028  | 135,769865 | 138,980625 | 100,049265 | 106,8465   | 120,78406  | 66,74133   | 83,807335  | 77,921885  |
| ID1473          | ECHM                          | 77,96155                                  | 87,581165  | 84,52541   | 96,53631   | 90,380915  | 97,75736   | 59,628175  | 65,75373   | 68,79302   | 65,08193   | 96,87861   | 98,52324   |
| ID64437         | EF1B                          | 81,36777                                  | 90,026875  | 80,725475  | 90,89321   | 88,64752   | 86,42319   | 68,371065  | 64,452695  | 75,83596   | 61,36695   | 68,4041    | 65,258145  |
| ID59353         | EF1B                          | 41,438115                                 | 45,03286   | 42,56405   | 68,24956   | 66,183025  | 63,3929    | 38,4016    | 34,1678    | 41,07757   | 55,66135   | 57,21794   | 58,39774   |
| ID1382          | EF1B                          | 85,846695                                 | 94,60124   | 85,082885  | 108,266295 | 96,533335  | 86,10452   | 74,954745  | 62,33091   | 69,259795  | 91,24666   | 78,430005  | 83,49917   |
| ID1251          | EF1D                          | 76,54766                                  | 101,40915  | 78,92609   | 145,92142  | 103,085705 | 75,00444   | 96,95495   | 71,994865  | 75,737265  | 134,52919  | 90,423475  | 93,721895  |
| ID1278          | EF1D                          | 99,748785                                 | 111,267195 | 99,595535  | 101,849045 | 94,559725  | 87,64875   | 91,911125  | 72,767205  | 87,866615  | 103,73728  | 79,081195  | 74,21261   |
| ID546           | EF2                           | 52,90957                                  | 56,323265  | 58,58694   | 77,743305  | 81,985405  | 94,71372   | 46,92001   | 32,98245   | 39,994115  | 61,39176   | 67,026335  | 69,36238   |
| ID610           | EFG1                          | 83,28244                                  | 86,55753   | 85,13953   | 132,506615 | 120,515245 | 120,7202   | 73,03933   | 61,99981   | 64,039765  | 34,819385  | 79,873605  | 83,2585    |

Table S-1

| ID <sup>1</sup> | Protein <sup>2</sup>         | Median of normalized volumes <sup>3</sup> |            |            |            |            |            |            |            |            |           |            |            |
|-----------------|------------------------------|-------------------------------------------|------------|------------|------------|------------|------------|------------|------------|------------|-----------|------------|------------|
|                 |                              | co_0 min                                  | co_30 min  | co_60 min  | co_24 h    | co_48 h    | co_72 h    | PI_0 min   | PI_30 min  | PI_60 min  | PI_24 h   | PI_48 h    | PI_72 h    |
| ID1128          | EI2BL,CAPG,ROAA              | 106,085505                                | 119,03714  | 107,786985 | 124,72469  | 126,24613  | 132,386395 | 64,499025  | 63,730785  | 74,169605  | 65,47084  | 81,290615  | 93,511535  |
| ID1078          | EIF3G,ARP3,TADBP,ACTB        | 99,93757                                  | 108,32973  | 105,05015  | 134,456845 | 119,226245 | 113,10765  | 83,306335  | 81,804565  | 85,754145  | 77,95114  | 74,778045  | 82,522035  |
| ID1913428       | ELOB                         | 125,54448                                 | 136,351715 | 148,61101  | 342,786665 | 453,26493  | 842,602905 | 99,02928   | 90,053345  | 100,050205 | 65,10389  | 166,01195  | 184,63571  |
| ID1015          | ENOA                         | 132,289915                                | 87,75459   | 117,119555 | 55,833135  | 51,78509   | 52,25965   | 283,46817  | 292,74734  | 267,07939  | 197,684   | 177,611245 | 131,75512  |
| ID1001          | ENOG                         | 104,94079                                 | 117,347145 | 110,52766  | 123,06929  | 130,066275 | 135,545935 | 56,408055  | 66,25472   | 68,207345  | 67,91352  | 83,173545  | 85,12051   |
| ID15652         | ENOG                         | 91,17362                                  | 105,172515 | 100,15314  | 116,625385 | 120,79445  | 125,54896  | 44,298515  | 53,879735  | 53,358265  | 77,02495  | 85,471995  | 82,29215   |
| ID953           | ENOG,RBBP7                   | 93,070865                                 | 108,95896  | 94,62498   | 132,710535 | 122,6311   | 116,05562  | 85,342835  | 84,341425  | 84,63007   | 72,69305  | 79,301835  | 71,877025  |
| ID274688        | ENPL                         | 70,095525                                 | 79,293535  | 72,56963   | 78,1079    | 69,310525  | 84,78929   | 85,15835   | 102,754575 | 91,42789   | 139,96314 | 77,18248   | 70,027495  |
| ID104582        | ENPL                         | 112,07059                                 | 128,84972  | 120,24541  | 110,568495 | 116,211945 | 121,836265 | 97,154405  | 79,33534   | 106,110695 | 118,72813 | 92,77252   | 88,310535  |
| ID132924        | ENPL                         | 49,704715                                 | 69,089075  | 44,01625   | 123,71895  | 125,15409  | 127,195985 | 100,6575   | 63,594355  | 108,76752  | 102,09717 | 88,48107   | 83,13858   |
| ID462           | ENPL                         | 106,16827                                 | 100,00445  | 98,70222   | 93,2526    | 110,55937  | 88,82765   | 98,70881   | 94,29857   | 94,200995  | 119,94748 | 95,990125  | 87,676265  |
| ID198671        | ERO1A                        | 124,46438                                 | 132,55691  | 145,135035 | 93,665145  | 104,90495  | 104,612115 | 124,69033  | 128,6047   | 135,28987  | 98,10031  | 75,735275  | 72,9607    |
| ID2298466       | ERP29,IF4E                   | 131,77083                                 | 146,703425 | 131,974465 | 345,21417  | 127,13165  | 79,911775  | 105,062475 | 95,65111   | 96,810665  | 155,13132 | 93,03082   | 174,304465 |
| ID1463          | ERP29,TPIS,ETHE1             | 101,72378                                 | 113,874145 | 107,51804  | 117,36839  | 113,58969  | 106,36462  | 58,699915  | 69,014575  | 72,726655  | 69,34197  | 86,14798   | 82,737005  |
| ID637           | EZRI                         | 97,66466                                  | 99,13942   | 99,897575  | 136,27566  | 119,81196  | 104,829325 | 71,617335  | 80,87928   | 81,7882    | 128,40934 | 87,390095  | 89,2336    |
| ID625           | EZRI,CALD1,SYK               | 79,285875                                 | 87,194655  | 86,09288   | 114,84912  | 102,08921  | 108,66978  | 59,202665  | 54,722475  | 62,590635  | 245,30616 | 78,58669   | 83,713995  |
| ID957           | F10A1,PDIA6,TXND4            | 104,159455                                | 115,036325 | 111,169805 | 97,938505  | 99,91222   | 103,915175 | 105,084675 | 109,150775 | 109,337275 | 123,06403 | 87,670875  | 85,771905  |
| ID191574        | FKB10                        | 79,067625                                 | 84,529315  | 83,050145  | 66,239     | 74,224265  | 72,552165  | 60,05311   | 50,363305  | 65,266135  | 48,57691  | 49,211575  | 58,41959   |
| ID387435        | FKB10                        | 84,440585                                 | 89,33243   | 89,07973   | 102,79421  | 100,921915 | 144,820775 | 73,75215   | 50,81994   | 57,985715  | 66,45999  | 67,12181   | 74,8812    |
| ID643           | FKB10,DC1I2                  | 99,842635                                 | 112,16365  | 101,90194  | 105,825615 | 96,834485  | 101,13478  | 73,7811    | 74,295335  | 76,573575  | 92,68039  | 83,25      | 82,03034   |
| ID871           | FKBP4                        | 98,3785                                   | 110,715695 | 103,971095 | 118,41371  | 107,891965 | 110,110655 | 59,86644   | 55,44968   | 63,680325  | 85,25229  | 84,032355  | 86,996925  |
| ID878           | FKBP4,HMCS1,HNRPK            | 107,628655                                | 119,62358  | 111,346125 | 132,752755 | 111,24614  | 103,11064  | 75,11219   | 62,92586   | 73,219785  | 93,00876  | 88,57577   | 90,886225  |
| ID692           | FKBP9                        | 67,79747                                  | 80,75614   | 71,378025  | 87,49751   | 70,352895  | 133,96875  | 105,4673   | 99,77974   | 111,401325 | 80,76354  | 65,75608   | 52,66364   |
| ID1173          | FSTL1,ANXA2                  | 81,287805                                 | 99,713885  | 69,131555  | 150,568805 | 143,26352  | 145,16537  | 99,28505   | 57,23515   | 122,96288  | 142,57138 | 90,23856   | 91,79898   |
| ID1137          | GALK1,ILEU,DNJBB,ROAA        | 97,201795                                 | 112,003595 | 101,955585 | 126,63899  | 123,56323  | 139,975575 | 114,1665   | 94,42572   | 87,12581   | 17,87545  | 74,668575  | 80,70339   |
| ID1087          | GALK1,ILEU,DNJBB,ROAA,SAHH   | 113,098385                                | 126,1945   | 120,8      | 111,357605 | 106,402835 | 111,337395 | 118,30111  | 114,595155 | 125,016035 | 24,29573  | 98,495735  | 92,896145  |
| ID460138        | GANAB                        | 81,81818                                  | 90,67608   | 83,717505  | 107,921125 | 110,05523  | 126,748205 | 73,33469   | 56,005275  | 50,71368   | 26,26938  | 51,405325  | 57,678395  |
| ID496           | GANAB                        | 108,192685                                | 116,482005 | 115,846225 | 105,202515 | 110,93363  | 130,688755 | 92,52415   | 94,336985  | 102,03854  | 73,66799  | 62,611045  | 61,292425  |
| ID509           | GANAB                        | 85,733875                                 | 92,936155  | 89,46344   | 90,723555  | 94,607515  | 148,945775 | 82,310035  | 82,471725  | 80,782135  | 72,16065  | 56,62759   | 59,338235  |
| ID4596          | GANAB                        | 96,92161                                  | 109,084265 | 86,278995  | 129,238265 | 120,775155 | 139,564905 | 42,0469    | 47,58142   | 43,7969    | 62,73942  | 64,339175  | 78,934205  |
| ID510           | GANAB,IMMT                   | 126,945265                                | 139,23663  | 138,328215 | 109,985715 | 109,669915 | 137,18108  | 89,05143   | 96,87711   | 93,19855   | 48,96262  | 56,49383   | 61,026595  |
| ID499           | GANAB,IMMT                   | 103,16191                                 | 108,028305 | 116,56342  | 90,09344   | 99,472605  | 121,066615 | 90,26156   | 74,950695  | 92,636445  | 62,36323  | 58,801245  | 58,45663   |
| ID825           | GDIA,ANXA3,NUCB1             | 139,124495                                | 110,925835 | 140,474555 | 94,94922   | 97,505855  | 92,46145   | 166,8889   | 220,9686   | 193,68113  | 178,51598 | 150,3906   | 121,892105 |
| ID828           | GDIA,VTDB,2AAA               | 133,04655                                 | 91,94065   | 131,00971  | 70,735475  | 72,35636   | 65,18205   | 208,54159  | 278,498915 | 241,357975 | 207,15806 | 174,57159  | 134,51286  |
| ID940           | GDIB                         | 116,79346                                 | 121,191085 | 124,183635 | 148,68798  | 147,238695 | 137,913205 | 49,184155  | 52,340685  | 58,27932   | 74,30319  | 79,40922   | 86,84127   |
| ID993           | GDIB,SAHH,IDH3A              | 97,384715                                 | 101,933725 | 107,695385 | 102,643985 | 96,25093   | 97,706565  | 81,61075   | 83,186745  | 83,183835  | 72,90004  | 72,28509   | 78,812385  |
| ID1513          | GDIR1,LGUL                   | 106,7343                                  | 118,108055 | 113,22415  | 124,503985 | 120,15317  | 120,878315 | 63,662515  | 68,571065  | 80,21645   | 87,82653  | 86,59842   | 85,575235  |
| ID17482         | GELS                         | 135,7546                                  | 110,064425 | 128,194305 | 80,03332   | 110,602295 | 169,826425 | 161,96474  | 160,4447   | 189,96281  | 145,20878 | 159,512975 | 113,549295 |
| ID584           | GELS,MX1,HS90A               | 93,905675                                 | 104,93371  | 99,23075   | 116,55324  | 125,044605 | 135,415535 | 80,020245  | 79,48212   | 77,445565  | 47,11515  | 85,72387   | 80,34639   |
| ID1166          | GIPC1                        | 111,700325                                | 129,067155 | 126,35797  | 142,025405 | 125,103295 | 127,0282   | 80,380605  | 74,56105   | 86,86392   | 0         | 109,479615 | 121,05907  |
| ID1167          | GLRX3,TFNL2,SNAG,CPIN1       | 111,02994                                 | 120,57365  | 113,214015 | 134,0003   | 121,546775 | 122,54552  | 63,15505   | 61,324735  | 69,793785  | 81,28063  | 84,456465  | 91,191915  |
| ID535           | GLU2B                        | 105,21014                                 | 118,23586  | 110,94032  | 92,01201   | 97,71002   | 103,788125 | 106,59636  | 101,405865 | 116,46459  | 124,14016 | 81,30747   | 74,519595  |
| ID2111          | GLU2B                        | 73,33603                                  | 80,300265  | 73,48993   | 85,527605  | 75,631555  | 85,297665  | 82,06112   | 79,34985   | 89,791725  | 113,34191 | 86,11447   | 88,19912   |
| ID3296127       | GMFB                         | 109,93477                                 | 133,2015   | 123,262345 | 99,74301   | 93,060155  | 111,046095 | 74,622825  | 76,64651   | 81,38354   | 62,75638  | 87,88126   | 118,91859  |
| ID505           | GRAP1,GANAB                  | 50,595445                                 | 58,23906   | 47,00738   | 122,122875 | 107,21568  | 171,11769  | 41,515695  | 45,858845  | 36,966995  | 54,06436  | 57,13417   | 72,23364   |
| ID309937        | GRAP1,GANAB                  | 94,35994                                  | 99,878325  | 72,720085  | 176,51725  | 119,636205 | 118,69415  | 29,538385  | 10,356745  | 9,32518    | 58,80149  | 67,71943   | 76,539465  |
| ID1495          | GRB2                         | 101,85374                                 | 114,548855 | 105,25004  | 129,224815 | 112,65304  | 106,38032  | 78,532295  | 84,89627   | 92,5844    | 108,75762 | 90,003515  | 87,871625  |
| ID3763691       | GRP75                        | 129,48729                                 | 136,84911  | 126,75166  | 125,538555 | 135,22256  | 106,667005 | 114,111695 | 108,4255   | 108,130785 | 110,03745 | 96,0373    | 94,384645  |
| ID18275         | GRP75,PDIA4                  | 102,9421                                  | 111,39775  | 90,720595  | 92,948445  | 116,851515 | 103,973385 | 94,650085  | 80,578185  | 88,12959   | 114,93111 | 92,33198   | 90,673495  |
| ID710           | GRP75,TF65,PDIA4,HSP7C,HSP71 | 89,915825                                 | 96,542195  | 92,431215  | 100,22445  | 94,60582   | 105,34274  | 99,348005  | 93,24781   | 94,23544   | 114,31484 | 96,306345  | 94,08641   |
| ID2845794       | GRP78                        | 107,38948                                 | 100,17752  | 117,928275 | 141,49643  | 140,22263  | 154,019205 | 127,86085  | 178,622745 | 129,80813  | 212,24352 | 137,90799  | 133,11296  |
| ID2846419       | GRP78                        | 62,90503                                  | 49,842765  | 73,044085  | 93,237615  | 108,88093  | 125,168455 | 70,10446   | 53,17403   | 41,647915  | 96,10396  | 80,78925   | 75,994385  |
| ID10719         | GRP78                        | 73,76355                                  | 118,049565 | 80,57081   | 75,234895  | 120,709025 | 68,551485  | 152,26049  | 42,659085  | 238,099685 | 154,68278 | 108,95272  | 88,42386   |
| ID672           | GRP78                        | 57,96031                                  | 49,519635  | 55,013195  | 92,568385  | 98,241505  | 100,081785 | 84,33462   | 75,426145  | 66,11048   | 118,78636 | 80,91476   | 77,97782   |
| ID318           | GRP78                        | 124,05096                                 | 136,49043  | 123,592255 | 164,57516  | 157,32148  | 227,279    | 41,869175  | 45,263005  | 2,42067    | 34,90055  | 71,71889   | 101,9466   |
| ID594           | GRP78                        | 102,642945                                | 100,24216  | 117,59754  | 105,86482  | 97,989405  | 131,870935 | 157,8366   | 154,38678  | 153,207475 | 132,38028 | 115,24759  | 103,66654  |
| ID658           | GRP78                        | 96,196245                                 | 96,781145  | 99,57343   | 105,957175 | 105,90628  | 95,633705  | 108,177795 | 101,48222  | 104,088045 | 151,24451 | 99,381655  | 96,76527   |

Table S-1

| Median of normalized volumes <sup>13</sup> |                        |            |            |            |            |            |            |            |            |            |           |            |            |
|--------------------------------------------|------------------------|------------|------------|------------|------------|------------|------------|------------|------------|------------|-----------|------------|------------|
| ID <sup>1</sup>                            | Protein <sup>2</sup>   | co_0 min   | co_30 min  | co_60 min  | co_24 h    | co_48 h    | co_72 h    | PI_0 min   | PI_30 min  | PI_60 min  | PI_24 h   | PI_48 h    | PI_72 h    |
| ID3760                                     | GRP78                  | 20,05108   | 24,192205  | 31,12976   | 37,39717   | 31,442495  | 43,916615  | 34,65171   | 41,542305  | 40,901185  | 216,79369 | 92,235315  | 112,103235 |
| ID366771                                   | GRP78                  | 74,446035  | 84,30294   | 60,86663   | 77,621035  | 98,37569   | 210,41836  | 154,20372  | 89,06232   | 129,426125 | 44,63832  | 60,14983   | 49,62885   |
| ID661                                      | GRP78                  | 47,27308   | 53,99535   | 59,149795  | 60,49348   | 52,426145  | 56,666785  | 59,879825  | 73,685425  | 64,878545  | 172,12602 | 91,201035  | 94,48044   |
| ID662                                      | GRP78                  | 79,99499   | 87,787145  | 92,59996   | 79,45162   | 76,21625   | 72,505315  | 83,511535  | 110,548635 | 91,675285  | 152,38431 | 92,680245  | 91,667185  |
| ID105671                                   | GRP78,ENPL             | 152,69661  | 143,80528  | 162,11817  | 96,56849   | 99,22915   | 95,2295    | 105,425255 | 179,444515 | 101,990825 | 112,12152 | 90,07343   | 113,73882  |
| ID120878                                   | GRP78,PDIA4            | 35,042515  | 39,446045  | 36,98826   | 79,166125  | 61,489065  | 81,46732   | 66,33739   | 37,53574   | 46,249085  | 63,43228  | 56,673645  | 47,968515  |
| ID960                                      | GSHB                   | 108,177545 | 121,67428  | 115,47211  | 112,960725 | 116,52578  | 121,58411  | 64,84325   | 68,30363   | 71,893775  | 80,85368  | 86,274185  | 89,12308   |
| ID943                                      | GSHB,K2C8,DDX39        | 113,06965  | 123,330615 | 136,1384   | 102,61881  | 111,525275 | 104,08506  | 95,09351   | 66,96806   | 71,04716   | 51,58723  | 67,23913   | 59,62164   |
| ID622                                      | GSPT1,HS90A,ERF3B      | 115,432645 | 120,285575 | 114,035345 | 150,506235 | 130,786255 | 119,359725 | 60,682775  | 54,030025  | 62,204035  | 77,14953  | 84,050525  | 93,1898    |
| ID1393                                     | GSTO1                  | 113,781315 | 135,040425 | 127,153835 | 119,58787  | 124,697785 | 124,35265  | 73,52388   | 96,864095  | 95,183985  | 0         | 93,72244   | 104,455755 |
| ID1408                                     | GSTO1,ERP29            | 100,271225 | 113,044415 | 106,12117  | 116,215125 | 116,96922  | 121,052785 | 100,27156  | 96,11949   | 112,81241  | 15,44478  | 87,54604   | 81,098595  |
| ID422947                                   | GSTO1,PSB7             | 107,92095  | 118,40206  | 117,26894  | 140,779605 | 112,476775 | 106,17534  | 90,948955  | 82,69164   | 90,707735  | 89,37616  | 68,777755  | 74,23645   |
| ID1516                                     | GSTP1                  | 111,094495 | 122,660225 | 121,913525 | 126,35216  | 127,17935  | 138,43344  | 62,077905  | 74,629525  | 80,8604    | 85,31845  | 86,92964   | 93,907105  |
| ID12547                                    | HDAC1,HNRPK,CH60       | 115,01545  | 112,6409   | 125,244235 | 120,23893  | 116,4344   | 102,965155 | 135,04692  | 125,16267  | 112,493765 | 98,74317  | 100,74951  | 89,628565  |
| ID1231                                     | HDGF                   | 134,47207  | 142,28801  | 123,11207  | 136,03602  | 109,044535 | 108,62374  | 58,57187   | 63,279845  | 67,507865  | 83,53764  | 96,105765  | 97,00226   |
| ID1211                                     | HDGF                   | 111,890845 | 130,82146  | 112,9552   | 150,708175 | 113,938695 | 120,36501  | 69,349435  | 65,171005  | 72,371185  | 64,85317  | 72,41474   | 75,705505  |
| ID88373                                    | HDGF                   | 109,057575 | 123,932365 | 113,0606   | 121,337105 | 109,429735 | 126,346155 | 59,803055  | 64,1119    | 68,3294    | 53,35838  | 73,24145   | 69,420965  |
| ID1194                                     | HDGF                   | 102,20748  | 114,48601  | 105,04423  | 108,451945 | 110,391575 | 123,240165 | 60,04378   | 64,00371   | 67,060245  | 57,94046  | 74,253765  | 73,085165  |
| ID217409                                   | HEXB                   | 106,99282  | 121,48155  | 116,473845 | 103,258815 | 111,88329  | 120,458055 | 133,54145  | 158,00282  | 139,81586  | 97,07329  | 80,423665  | 80,613375  |
| ID923                                      | HNRH1,CNDP2            | 96,82487   | 109,96634  | 106,45446  | 112,32273  | 115,34106  | 131,771555 | 107,74675  | 96,737035  | 88,812865  | 63,51034  | 61,18937   | 68,68006   |
| ID447263                                   | HNRH1,CNDP2            | 111,606235 | 119,558835 | 114,178925 | 109,868895 | 115,37623  | 105,578435 | 110,99925  | 137,06592  | 118,567915 | 67,04907  | 61,08742   | 72,611925  |
| ID918                                      | HNRH1,CNDP2,SNX6       | 104,70776  | 122,56118  | 115,402315 | 138,14821  | 130,40084  | 133,0849   | 102,285955 | 80,819215  | 70,13008   | 70,03228  | 79,360995  | 82,886735  |
| ID971                                      | HNRH1,GDIB,2ABA        | 98,20386   | 104,412135 | 103,621485 | 121,53555  | 114,678505 | 119,226705 | 71,024995  | 68,495505  | 70,84428   | 70,42163  | 80,024475  | 81,758245  |
| ID29521                                    | HNRH1,HNRH2            | 107,52559  | 127,29003  | 117,772325 | 142,77507  | 132,90265  | 139,46523  | 94,33878   | 77,509375  | 72,09706   | 68,90861  | 80,013625  | 83,917895  |
| ID471051                                   | HNRH1,TIF1B            | 122,213835 | 134,62639  | 125,686185 | 144,152425 | 123,81122  | 128,862425 | 101,77396  | 92,81809   | 89,24436   | 35,08008  | 79,917055  | 84,364065  |
| ID457                                      | HNRL2                  | 89,44624   | 91,45993   | 90,83303   | 112,493875 | 130,145175 | 135,259135 | 83,03438   | 47,274985  | 48,72722   | 33,89547  | 59,201965  | 61,39204   |
| ID493                                      | HNRL2                  | 88,828005  | 85,487245  | 89,902445  | 103,87505  | 84,56136   | 68,074625  | 44,0409    | 15,271045  | 28,25315   | 41,24255  | 64,166915  | 62,667705  |
| ID441                                      | HNRL2                  | 108,646335 | 107,68422  | 104,046305 | 141,68642  | 148,5574   | 139,66163  | 83,45177   | 47,32806   | 53,306735  | 49,8488   | 71,337975  | 67,488605  |
| ID458                                      | HNRL2                  | 98,60034   | 96,936265  | 93,248825  | 121,839605 | 126,55021  | 127,6677   | 78,75278   | 45,08067   | 50,526775  | 41,4018   | 64,0626    | 64,21495   |
| ID1203                                     | HNRPC                  | 86,890715  | 91,10909   | 94,772765  | 121,219365 | 92,34883   | 122,356345 | 39,730145  | 32,18253   | 38,632485  | 76,80908  | 65,516835  | 81,70471   |
| ID2964442                                  | HNRPC,STRAP            | 105,425965 | 111,84221  | 133,17342  | 130,768295 | 103,8956   | 70,21711   | 38,562105  | 17,183005  | 36,115845  | 79,06916  | 76,83554   | 90,610675  |
| ID305540                                   | HNRPC,STRAP            | 98,850885  | 87,61071   | 112,58245  | 93,975865  | 87,45691   | 51,440365  | 31,19687   | 11,50037   | 26,98523   | 111,28244 | 52,65709   | 65,404985  |
| ID787                                      | HNRPK                  | 71,63349   | 74,73596   | 75,79276   | 105,43141  | 91,095285  | 87,64479   | 83,335785  | 97,01418   | 86,78947   | 126,31511 | 116,63789  | 100,972955 |
| ID788                                      | HNRPK                  | 106,363365 | 118,735715 | 113,104085 | 125,25224  | 120,390495 | 133,492725 | 97,039455  | 76,773445  | 77,13336   | 100,78864 | 105,734605 | 98,36566   |
| ID770                                      | HNRPK                  | 150,135115 | 95,891515  | 147,1807   | 58,20586   | 51,5457    | 49,98533   | 260,049045 | 310,480265 | 271,36329  | 221,09554 | 199,715905 | 142,180875 |
| ID790                                      | HNRPK                  | 96,238185  | 108,307985 | 102,00321  | 121,55767  | 108,41824  | 98,309665  | 54,58733   | 76,96795   | 80,284765  | 112,91596 | 100,35124  | 93,75387   |
| ID797                                      | HNRPK,HSP7C            | 96,375335  | 105,274025 | 102,79675  | 111,623135 | 106,06876  | 124,05537  | 113,02581  | 83,73214   | 72,76748   | 90,15288  | 89,681195  | 81,31566   |
| ID879                                      | HNRPK,TBL1R,HMCS1,TBA3 | 84,902285  | 93,48237   | 86,002045  | 100,809605 | 103,020475 | 117,37388  | 48,70837   | 44,73838   | 58,46978   | 58,89311  | 56,56334   | 64,032255  |
| ID447                                      | HNRPU                  | 74,85803   | 84,787985  | 76,76482   | 106,711375 | 106,11203  | 131,844675 | 62,01889   | 50,844965  | 48,972265  | 46,64981  | 66,740345  | 64,884805  |
| ID391                                      | HNRPU                  | 103,401705 | 107,33846  | 108,232035 | 123,376135 | 129,226195 | 122,094625 | 90,115435  | 73,66978   | 84,302045  | 72,90708  | 69,765035  | 77,93713   |
| ID464                                      | HNRPU,HNRH1            | 74,595835  | 80,84048   | 72,04142   | 113,016285 | 124,50058  | 135,692615 | 52,49771   | 61,69535   | 50,64426   | 95,96883  | 105,895225 | 103,391635 |
| ID446                                      | HNRPU,PPCE             | 94,586575  | 96,358865  | 88,86922   | 118,519455 | 114,53813  | 129,953475 | 51,869995  | 23,888905  | 38,84938   | 39,45276  | 41,81824   | 51,247565  |
| ID415                                      | HNRPU,PPCE             | 105,356995 | 117,39996  | 105,219215 | 121,5833   | 121,1973   | 136,324845 | 73,03571   | 56,744405  | 58,782905  | 83,92116  | 50,84441   | 51,00426   |
| ID486                                      | HS105                  | 105,805465 | 116,25947  | 107,61342  | 150,191575 | 128,97942  | 113,58565  | 60,62429   | 53,49747   | 56,734425  | 81,39342  | 86,50003   | 94,69202   |
| ID485                                      | HS105                  | 97,100925  | 105,670875 | 99,896355  | 132,12283  | 117,2509   | 107,455415 | 58,03128   | 50,132975  | 52,434265  | 73,91053  | 83,02089   | 89,99386   |
| ID477                                      | HS105,GPIA1            | 101,95878  | 112,640365 | 105,825225 | 151,31687  | 129,54797  | 118,956375 | 67,836935  | 58,084195  | 59,083875  | 86,20448  | 83,405575  | 92,388165  |
| ID573                                      | HS90A                  | 130,598265 | 151,38603  | 138,355455 | 170,489275 | 131,70239  | 102,912115 | 80,145075  | 63,636385  | 83,576105  | 104,61483 | 85,60073   | 95,505955  |
| ID10923                                    | HS90A                  | 83,894015  | 93,26623   | 70,772775  | 138,012155 | 116,15283  | 104,667235 | 46,790185  | 29,574325  | 38,336135  | 79,05203  | 63,787485  | 77,347505  |
| ID571                                      | HS90A                  | 146,594215 | 162,285625 | 157,069695 | 165,77699  | 164,43753  | 79,28264   | 59,98812   | 73,382865  | 95,34795   | 93,26863  | 80,02381   | 92,388165  |
| ID3841                                     | HS90A                  | 34,945105  | 36,6603    | 47,63837   | 58,077875  | 57,944635  | 66,021735  | 32,17012   | 22,38615   | 30,748605  | 62,4076   | 56,78303   | 53,65962   |
| ID596190                                   | HS90A                  | 12,23649   | 12,21398   | 20,44292   | 33,57864   | 33,74787   | 72,588515  | 18,029725  | 12,815975  | 17,184785  | 58,41809  | 42,826555  | 47,849495  |
| ID553                                      | HS90A                  | 111,247765 | 104,74967  | 90,45744   | 87,449885  | 100,59974  | 82,953425  | 92,07409   | 82,984535  | 86,882215  | 76,51523  | 97,26508   | 92,755015  |
| ID575                                      | HS90A                  | 100,71742  | 107,764475 | 93,801615  | 148,62892  | 135,059015 | 110,34707  | 63,1467    | 55,002585  | 63,559395  | 91,4066   | 83,286115  | 94,228485  |
| ID21718                                    | HS90A                  | 113,40708  | 116,185445 | 112,71467  | 132,295925 | 113,7598   | 114,72872  | 86,473445  | 83,137125  | 81,22768   | 103,55931 | 99,771045  | 98,62234   |
| ID628                                      | HS90A                  | 124,13819  | 98,011125  | 120,186715 | 74,64171   | 64,8243    | 80,84788   | 194,37371  | 204,763315 | 189,39077  | 176,44977 | 169,846375 | 132,485205 |
| ID20414                                    | HS90A                  | 106,252805 | 85,73414   | 99,12609   | 95,426975  | 76,42019   | 88,9135    | 137,98746  | 139,2101   | 133,74298  | 137,97763 | 153,49622  | 135,10804  |
| ID603                                      | HS90A                  | 85,59486   | 91,106195  | 95,020155  | 116,781935 | 109,372415 | 124,97468  | 99,111025  | 94,440955  | 102,192445 | 130,06831 | 121,048425 | 106,026875 |

Table S-1

| ID <sup>1</sup> | Protein <sup>2</sup>         | Median of normalized volumes <sup>3</sup> |            |            |            |            |            |            |            |            |           |            |            |
|-----------------|------------------------------|-------------------------------------------|------------|------------|------------|------------|------------|------------|------------|------------|-----------|------------|------------|
|                 |                              | co_0 min                                  | co_30 min  | co_60 min  | co_24 h    | co_48 h    | co_72 h    | PI_0 min   | PI_30 min  | PI_60 min  | PI_24 h   | PI_48 h    | PI_72 h    |
| ID3931          | HS90A                        | 95,00591                                  | 93,913145  | 88,724355  | 83,15191   | 74,86984   | 69,465475  | 48,96825   | 34,91927   | 44,71234   | 71,82701  | 83,6288    | 69,276115  |
| ID623           | HS90A                        | 61,942225                                 | 66,063285  | 65,02128   | 111,06411  | 102,771475 | 119,851215 | 53,50494   | 50,47772   | 51,98419   | 67,68655  | 73,41094   | 72,54872   |
| ID559           | HS90A,DP13A,SRC8             | 127,479655                                | 142,858675 | 127,439645 | 147,22616  | 147,964215 | 107,43242  | 77,02518   | 58,44093   | 69,661975  | 85,79541  | 78,81519   | 77,2794    |
| ID574           | HS90A,HS90B                  | 147,834225                                | 172,8703   | 152,226155 | 151,673435 | 143,18015  | 117,18765  | 62,99558   | 64,429965  | 70,83512   | 105,07607 | 90,835385  | 106,15672  |
| ID2816455       | HS90A,HS90B                  | 118,10404                                 | 117,902445 | 121,06384  | 116,161435 | 122,240535 | 89,437475  | 77,961155  | 70,656295  | 80,937645  | 95,1014   | 93,309375  | 96,13312   |
| ID627           | HS90A,MRE11,FETA             | 106,587365                                | 90,85989   | 106,294075 | 96,68341   | 78,19119   | 95,386675  | 144,098335 | 155,66808  | 153,99069  | 146,75998 | 150,544555 | 126,86897  |
| ID4106          | HS90B,HS90A                  | 98,088415                                 | 92,660315  | 81,495185  | 82,82879   | 113,261415 | 84,209215  | 112,33307  | 114,93144  | 109,947665 | 80,9868   | 98,816385  | 108,180175 |
| ID1672          | HSB11                        | 101,9225                                  | 111,314965 | 106,7508   | 125,42977  | 114,440435 | 100,43557  | 104,84333  | 90,719715  | 115,08602  | 101,32364 | 79,31445   | 77,06921   |
| ID1703          | HSB11                        | 87,96661                                  | 100,666005 | 95,416845  | 108,974855 | 102,216265 | 96,15531   | 57,48677   | 67,711555  | 70,712475  | 89,9761   | 81,816465  | 87,609135  |
| ID720           | HSP71                        | 91,740895                                 | 90,808095  | 90,164555  | 109,883285 | 113,02128  | 97,17259   | 104,33661  | 94,59872   | 95,64972   | 101,45382 | 108,574715 | 101,24557  |
| ID723           | HSP71,LMNB2,GRP75            | 79,392905                                 | 87,205455  | 86,60981   | 91,88415   | 92,319615  | 101,08123  | 98,94928   | 88,059575  | 90,17697   | 112,94543 | 99,52631   | 90,085635  |
| ID717           | HSP71,PDIA4                  | 91,73067                                  | 65,578725  | 90,839945  | 57,44322   | 47,94298   | 60,476415  | 172,48265  | 168,200155 | 159,49359  | 196,47584 | 178,02231  | 146,99612  |
| ID491           | HSP74                        | 117,387885                                | 131,42829  | 117,19577  | 144,4244   | 134,95091  | 117,233995 | 60,07134   | 57,71747   | 61,25794   | 70,88544  | 84,8948    | 94,354475  |
| ID490           | HSP74                        | 90,771295                                 | 101,63518  | 91,525075  | 116,785535 | 113,614755 | 117,754335 | 52,37114   | 49,40412   | 52,056805  | 66,12669  | 81,101055  | 90,147525  |
| ID686           | HSP7C                        | 92,82365                                  | 95,532505  | 84,641885  | 99,23808   | 122,995975 | 92,919495  | 99,348815  | 86,733335  | 89,35226   | 69,54569  | 94,659865  | 100,87749  |
| ID822           | HSP7C,AINX                   | 97,661575                                 | 106,73824  | 98,802635  | 121,679165 | 116,264655 | 108,46072  | 91,90038   | 74,22735   | 70,71322   | 81,2694   | 84,29945   | 94,814655  |
| ID680           | HSP7C,HSP71,LMNB2            | 82,8204                                   | 85,01673   | 79,53188   | 97,247     | 93,162515  | 92,50263   | 76,68602   | 64,892025  | 61,75188   | 75,42187  | 81,779855  | 78,397565  |
| ID694           | HSP7C,LMNB1                  | 38,43073                                  | 41,77555   | 44,04876   | 79,20611   | 69,62381   | 91,807305  | 57,05817   | 44,937255  | 48,86529   | 93,77901  | 71,939555  | 68,176505  |
| ID1420          | HSPB1                        | 90,82275                                  | 102,089355 | 103,15526  | 97,600895  | 98,284495  | 96,73678   | 83,917425  | 93,893135  | 102,95629  | 72,08921  | 86,16521   | 76,8637    |
| ID1455          | HSPB1                        | 94,72076                                  | 95,783005  | 132,876265 | 92,23018   | 84,44504   | 69,27203   | 182,64095  | 182,63925  | 119,999255 | 67,0233   | 81,16726   | 84,841955  |
| ID1453          | HSPB1,ECHM                   | 93,314105                                 | 103,741455 | 96,96968   | 127,86187  | 114,96128  | 115,372435 | 68,68163   | 56,393815  | 81,247985  | 6,83023   | 92,77232   | 88,54212   |
| ID1492          | HSPB1,PIMT                   | 112,735535                                | 124,75466  | 119,88994  | 130,042445 | 128,20654  | 139,78589  | 74,81586   | 71,755155  | 79,26768   | 0         | 99,30635   | 102,52069  |
| ID5403          | HYOU1                        | 104,933805                                | 109,79053  | 100,441805 | 128,196315 | 152,12458  | 129,49055  | 62,808955  | 44,81711   | 54,219235  | 51,55463  | 87,07681   | 97,178085  |
| ID376           | HYOU1                        | 78,692405                                 | 85,653525  | 84,676535  | 79,434045  | 81,43829   | 95,41947   | 82,843155  | 83,361105  | 87,89132   | 151,59645 | 88,00485   | 82,82729   |
| ID5526          | HYOU1                        | 125,7966                                  | 132,156595 | 115,974065 | 153,68373  | 175,256665 | 142,99983  | 65,832945  | 48,81122   | 60,526875  | 55,90508  | 92,16754   | 95,041985  |
| ID364           | HYOU1,OXRP                   | 107,498435                                | 118,59882  | 113,856445 | 100,6835   | 102,32023  | 107,93351  | 97,2608    | 106,16447  | 108,65854  | 139,36953 | 89,246685  | 84,58999   |
| ID365           | HYOU1,OXRP                   | 122,65144                                 | 136,606545 | 128,02801  | 129,136635 | 124,25898  | 117,644545 | 101,95997  | 110,962125 | 111,558195 | 131,92476 | 88,866655  | 85,918275  |
| ID475           | ICAL                         | 81,13175                                  | 88,34536   | 75,710305  | 115,03918  | 105,130375 | 118,265945 | 51,246025  | 41,973565  | 53,25658   | 44,2227   | 68,30676   | 74,53579   |
| ID430           | ICAL                         | 118,86964                                 | 112,555385 | 104,101605 | 132,17739  | 127,111525 | 124,72643  | 84,2293    | 74,05765   | 79,850525  | 79,22365  | 93,687815  | 80,843295  |
| ID427           | ICAL                         | 90,356435                                 | 92,703825  | 84,24817   | 111,48376  | 113,28335  | 119,219995 | 64,78627   | 57,74562   | 67,53671   | 64,65539  | 81,909315  | 76,82268   |
| ID126195        | ICAL                         | 82,661855                                 | 87,257905  | 78,89539   | 97,618375  | 102,540295 | 116,56264  | 54,771555  | 51,334475  | 61,093735  | 64,0685   | 73,648785  | 71,981055  |
| ID428           | ICAL,DREB                    | 94,20429                                  | 98,859605  | 86,04793   | 125,64519  | 112,14956  | 112,14956  | 63,647     | 50,659825  | 58,37536   | 65,6613   | 75,48431   | 78,057045  |
| ID1174          | IDH3A                        | 94,31733                                  | 106,61145  | 92,286985  | 104,256595 | 82,825515  | 99,24972   | 66,918565  | 56,534225  | 62,070545  | 63,33772  | 77,00193   | 76,61631   |
| ID1458          | ID11,PSB10,EXOS4             | 113,26455                                 | 124,50535  | 125,860455 | 113,50116  | 133,42578  | 136,298865 | 66,623215  | 74,60969   | 75,955545  | 83,60937  | 83,1818    | 80,91875   |
| ID1656          | IF1AX                        | 90,196915                                 | 94,327035  | 89,096555  | 123,1911   | 111,416655 | 106,815595 | 72,03818   | 72,75479   | 78,766555  | 99,25431  | 95,33334   | 92,53559   |
| ID3591281       | IF1AX,SORCN                  | 94,05784                                  | 102,02258  | 100,8249   | 134,331325 | 165,874425 | 182,521075 | 81,98823   | 85,95383   | 89,279395  | 46,87414  | 146,71883  | 115,60856  |
| ID1196          | IF2A                         | 114,800555                                | 125,5537   | 123,5164   | 142,621245 | 125,47062  | 122,097485 | 79,438875  | 72,8355    | 79,088445  | 83,12673  | 84,7699    | 91,28181   |
| ID964           | IF2B,ARP3,QCR1,PDIA3         | 99,45949                                  | 102,164185 | 95,83532   | 97,324985  | 105,74849  | 103,138685 | 98,608305  | 84,020515  | 85,99269   | 60,78503  | 65,90197   | 64,27305   |
| ID1240          | IF31,ANXA2,HDFG,TPM2         | 112,258575                                | 121,853625 | 118,93118  | 109,93777  | 99,372405  | 104,77595  | 65,589615  | 66,17816   | 70,22354   | 81,21574  | 77,835675  | 75,55322   |
| ID1185          | IF32,NPM                     | 90,148945                                 | 98,551025  | 91,383845  | 112,65182  | 95,680255  | 90,77182   | 90,724125  | 72,685425  | 73,077985  | 89,1695   | 80,654325  | 88,282805  |
| ID1019          | IF4A1,ACTG,HNRPF,NUDC        | 114,82808                                 | 120,09022  | 125,996965 | 131,570115 | 113,36608  | 92,45218   | 73,02741   | 60,04715   | 74,79233   | 113,64645 | 91,98746   | 86,02946   |
| ID990           | IF4A1,HNRPF,ACTG             | 131,13492                                 | 144,9141   | 144,8117   | 136,184055 | 131,43918  | 122,018655 | 117,848925 | 98,79915   | 101,504385 | 101,69725 | 91,82451   | 84,41809   |
| ID13655         | IF4A1,NDRG3,RBBP7,PDIA6,VIME | 53,970295                                 | 59,6735    | 60,00808   | 92,348315  | 96,52328   | 123,29103  | 66,75617   | 60,025965  | 73,363395  | 67,16409  | 66,967105  | 71,889075  |
| ID617           | IF4B,NEBU                    | 90,349495                                 | 96,301365  | 83,112385  | 128,707615 | 111,773775 | 103,52297  | 57,92254   | 50,27002   | 54,477025  | 88,84544  | 79,7504    | 82,240425  |
| ID1697          | IF5A1                        | 125,57819                                 | 146,489115 | 139,50991  | 138,87106  | 124,756575 | 114,183975 | 66,63088   | 76,86786   | 79,98823   | 74,94364  | 76,364735  | 90,134065  |
| ID1465          | IF6                          | 96,467605                                 | 106,321245 | 95,37545   | 119,655005 | 101,297625 | 94,115245  | 69,30174   | 68,68271   | 77,717925  | 83,0792   | 84,810395  | 96,055815  |
| ID1139          | ILEU,SCMC1,ROAA              | 83,392185                                 | 89,81473   | 92,7421    | 93,564795  | 87,37495   | 105,008575 | 76,462895  | 57,802685  | 58,74636   | 5,87952   | 68,645815  | 69,017205  |
| ID3406          | IMA7                         | 96,587685                                 | 77,91618   | 97,533905  | 94,26415   | 92,54253   | 90,8098    | 107,433025 | 140,32007  | 110,002445 | 131,18498 | 107,957165 | 97,41211   |
| ID577           | IMMT,PLOD3,HS90B             | 121,475975                                | 139,815665 | 136,578355 | 127,301095 | 134,033915 | 129,59463  | 116,448085 | 96,204505  | 119,38282  | 76,2547   | 92,47863   | 89,24167   |
| ID630           | IMMT,PLOD3,HS90B             | 102,77031                                 | 109,848325 | 111,11025  | 108,66548  | 108,50564  | 102,405015 | 115,18579  | 94,920475  | 117,273365 | 120,38061 | 86,134395  | 83,40469   |
| ID631           | IMMT,PLOD3,THOP1             | 108,12224                                 | 111,022605 | 113,9557   | 113,180675 | 120,158985 | 121,754005 | 124,95714  | 100,72033  | 122,07194  | 84,60941  | 86,644135  | 84,61247   |
| ID1300          | IPYR                         | 87,844495                                 | 98,36225   | 89,5496    | 96,058825  | 94,7792    | 109,719145 | 55,093885  | 61,73592   | 70,24407   | 71,18552  | 77,038925  | 79,525625  |
| ID1291          | IPYR,GBB1,GBB2               | 100,56777                                 | 111,96815  | 100,129775 | 123,49058  | 111,224865 | 105,34823  | 56,09966   | 63,030795  | 72,317685  | 87,38117  | 77,57249   | 84,347965  |
| ID195754        | ITA3                         | 104,98391                                 | 106,416625 | 105,47851  | 105,272145 | 122,2793   | 119,89359  | 90,449285  | 86,25528   | 87,861965  | 146,92881 | 90,3209    | 78,291055  |
| ID393           | ITA3                         | 95,27765                                  | 101,54928  | 100,76714  | 108,8761   | 118,521855 | 128,336745 | 89,459335  | 77,87812   | 83,849485  | 102,88587 | 75,698945  | 77,675315  |
| ID408           | ITA3                         | 111,592935                                | 114,188295 | 113,47922  | 114,55497  | 121,915565 | 109,672645 | 95,45385   | 88,754445  | 92,530485  | 138,73888 | 97,16046   | 84,353605  |
| ID981           | K1C17                        | 92,822125                                 | 100,18997  | 100,645075 | 128,91711  | 101,51616  | 96,99223   | 95,46175   | 91,544425  | 85,04494   | 90,56365  | 63,458235  | 71,332155  |

Table S-1

| ID <sup>1</sup> | Protein <sup>2</sup>  | Median of normalized volumes <sup>3</sup> |            |            |            |            |            |            |            |            |           |            |            |
|-----------------|-----------------------|-------------------------------------------|------------|------------|------------|------------|------------|------------|------------|------------|-----------|------------|------------|
|                 |                       | co_0 min                                  | co_30 min  | co_60 min  | co_24 h    | co_48 h    | co_72 h    | PI_0 min   | PI_30 min  | PI_60 min  | PI_24 h   | PI_48 h    | PI_72 h    |
| ID927           | K1C17,ATPB,PDIA6      | 100,916795                                | 113,499225 | 105,92225  | 101,650385 | 97,506635  | 104,230525 | 142,165805 | 141,75504  | 159,196665 | 127,68598 | 90,40603   | 83,857635  |
| ID986           | K1C18,ACTB,NUP43      | 116,574                                   | 117,4766   | 118,74429  | 112,12773  | 115,11042  | 106,63233  | 164,099215 | 143,409985 | 144,96664  | 80,80191  | 87,08786   | 81,149675  |
| ID1086          | K1C18,ACTB,NUP43      | 107,39239                                 | 109,34952  | 104,55523  | 114,58219  | 108,540025 | 112,60658  | 119,05607  | 111,35651  | 110,82865  | 75,78423  | 74,47764   | 80,792675  |
| ID417           | K1C9                  | 164,60623                                 | 107,54659  | 150,232325 | 72,883955  | 63,247785  | 73,83169   | 219,81848  | 235,73018  | 228,39343  | 221,54458 | 201,85055  | 114,57802  |
| ID892           | K2C8                  | 63,454985                                 | 67,277035  | 69,379575  | 89,4619    | 94,420455  | 112,46449  | 105,376175 | 100,885655 | 101,86584  | 85,36767  | 83,319925  | 82,96057   |
| ID900           | K2C8                  | 107,49957                                 | 106,04761  | 111,44065  | 104,041845 | 100,57192  | 99,68771   | 114,402355 | 99,83268   | 107,78299  | 87,94113  | 87,7491    | 86,11384   |
| ID899           | K2C8                  | 48,56458                                  | 46,926475  | 52,96113   | 85,53226   | 85,615055  | 95,23819   | 78,663415  | 72,72335   | 78,144055  | 88,66947  | 86,666705  | 87,54794   |
| ID913           | K2C8,PSMD5            | 81,4663                                   | 80,52095   | 84,63503   | 111,181235 | 92,966555  | 82,68716   | 88,122695  | 75,86764   | 86,30302   | 93,77037  | 101,806085 | 99,938565  |
| ID884           | K2C8,UAP56,IF2B,GSBH  | 115,47763                                 | 116,7006   | 111,89801  | 110,091835 | 117,093035 | 107,8632   | 139,152875 | 115,43405  | 114,55504  | 81,33877  | 93,672635  | 86,48514   |
| ID989           | KAP0,TXND5            | 106,28601                                 | 120,52898  | 111,58428  | 106,89814  | 109,8653   | 112,75433  | 87,056825  | 87,83854   | 92,44173   | 157,52055 | 91,071245  | 89,40862   |
| ID959           | KAP0,TXND5            | 190,280225                                | 219,773175 | 242,779945 | 143,48342  | 140,191785 | 137,24832  | 91,627845  | 69,197815  | 93,91855   | 78,72862  | 75,17587   | 71,935755  |
| ID3670          | KAP2,IF4A1            | 72,43548                                  | 82,36095   | 73,03805   | 141,543565 | 145,900115 | 132,79412  | 76,284215  | 68,52028   | 72,238215  | 70,41165  | 83,33537   | 87,77666   |
| ID556498        | KBP                   | 34,23585                                  | 34,26936   | 40,758465  | 85,07427   | 63,55712   | 158,587995 | 56,855275  | 38,580105  | 42,135005  | 102,47817 | 70,450505  | 66,82817   |
| ID207376        | KCRB                  | 126,959385                                | 146,883025 | 162,48926  | 134,855525 | 115,12609  | 135,714415 | 124,71723  | 111,10026  | 95,782795  | 96,95912  | 67,3643    | 50,77126   |
| ID3760270       | KU86                  | 119,62602                                 | 121,50887  | 121,54567  | 141,421155 | 131,283085 | 118,861545 | 82,733305  | 73,637365  | 76,618035  | 71,54231  | 88,33985   | 80,209215  |
| ID629           | KU86,HS90A            | 113,35748                                 | 115,778805 | 117,61118  | 126,20227  | 136,661895 | 124,61587  | 82,746765  | 76,949595  | 77,58779   | 75,12675  | 85,44791   | 77,10479   |
| ID618           | KU86,HS90A            | 83,064715                                 | 88,8023    | 87,92106   | 117,796105 | 125,327175 | 125,518345 | 60,811215  | 50,342545  | 53,45534   | 64,47075  | 77,644125  | 70,768345  |
| ID1962730       | LEG1                  | 111,411355                                | 127,35051  | 121,050215 | 136,40812  | 145,158345 | 127,826155 | 81,647245  | 79,42357   | 81,915745  | 76,94335  | 93,779035  | 143,15133  |
| ID10509         | LG3BP                 | 75,07161                                  | 79,59437   | 71,30266   | 71,21765   | 73,970875  | 83,328055  | 69,52438   | 68,73782   | 72,41708   | 122,15319 | 96,077965  | 84,047895  |
| ID777           | LKHA4                 | 114,081935                                | 111,8335   | 133,659385 | 112,029695 | 109,98277  | 115,471505 | 63,65709   | 74,27855   | 71,718945  | 96,8233   | 90,044925  | 87,63545   |
| ID765           | LMNA                  | 74,637825                                 | 80,77912   | 84,16397   | 130,100125 | 121,17434  | 164,284475 | 121,193275 | 111,21289  | 117,899765 | 46,71914  | 80,54018   | 80,472445  |
| ID490428        | LMNA,AGM1             | 72,75195                                  | 73,675015  | 74,95047   | 121,539965 | 126,35107  | 115,195395 | 111,662615 | 97,834095  | 99,50787   | 10,82725  | 102,33386  | 104,96687  |
| ID709           | LMNB1                 | 100,045435                                | 87,92174   | 108,11691  | 117,16327  | 105,2859   | 115,74042  | 110,28562  | 99,050155  | 105,92859  | 86,0929   | 75,699795  | 63,132845  |
| ID712           | LMNB1                 | 90,314005                                 | 108,165305 | 90,83236   | 97,42072   | 108,52997  | 146,310635 | 127,448165 | 128,0674   | 121,04468  | 63,57538  | 84,505225  | 68,45556   |
| ID708           | LMNB1                 | 84,368835                                 | 102,80584  | 80,974155  | 93,292345  | 122,336355 | 147,712825 | 141,546215 | 128,026815 | 139,40798  | 79,63217  | 84,668595  | 67,24641   |
| ID537545        | LMNB1,TKT             | 66,298595                                 | 81,7659    | 55,797325  | 89,978975  | 110,15841  | 162,78005  | 139,70436  | 91,78429   | 135,395465 | 76,2726   | 75,34978   | 61,424415  |
| ID395           | LPPRC                 | 113,24041                                 | 120,073235 | 119,933365 | 138,41757  | 138,326715 | 130,74728  | 86,664515  | 75,23873   | 82,176585  | 99,55126  | 75,84155   | 79,92071   |
| ID1308          | LZTL1,SFRS1,SPEE      | 109,796545                                | 118,521505 | 112,012725 | 136,354325 | 106,280195 | 101,8972   | 59,558525  | 62,543365  | 68,75305   | 65,362785 | 70,606305  | 70,606305  |
| ID1022          | M6PBP,IF35,HNRPF      | 97,971305                                 | 103,78247  | 106,951335 | 114,930715 | 109,069535 | 106,37448  | 70,4702    | 76,47621   | 80,338155  | 84,75392  | 76,875125  | 81,27927   |
| ID204237        | M6PBP,IF35,HNRPF      | 101,75742                                 | 116,198855 | 117,00938  | 138,304345 | 130,878535 | 118,2404   | 96,674515  | 96,48265   | 95,461405  | 151,44743 | 106,43579  | 112,34828  |
| ID691           | MAOX,SWP70,PDIA3      | 98,192955                                 | 92,601085  | 88,19165   | 78,424095  | 67,507345  | 72,400775  | 113,8348   | 97,831575  | 100,891345 | 89,2879   | 133,036205 | 133,534195 |
| ID44539         | MARCS                 | 104,58545                                 | 85,799995  | 105,316545 | 107,07222  | 122,638965 | 172,44661  | 160,65049  | 161,2689   | 166,99454  | 159,61559 | 99,31577   | 199,43289  |
| ID1355          | MARE1,EFHD2           | 107,408675                                | 121,82158  | 117,40969  | 124,861425 | 112,38746  | 106,274915 | 65,737195  | 67,67955   | 81,198895  | 94,53999  | 83,24865   | 84,657635  |
| ID1360          | MARE1,TBCB,ANXA5      | 90,787785                                 | 101,309355 | 97,368855  | 100,30194  | 96,19401   | 98,240415  | 59,46612   | 61,35071   | 70,643265  | 77,65007  | 72,84352   | 73,913625  |
| ID409           | MATR3                 | 104,321075                                | 115,726045 | 108,062735 | 125,598945 | 123,287965 | 141,95459  | 82,467955  | 74,2687    | 75,96514   | 113,78984 | 77,625785  | 73,63248   |
| ID3316          | MCM6,2AAA             | 133,278485                                | 84,41908   | 129,07864  | 52,586285  | 51,209535  | 50,48305   | 234,13061  | 270,171245 | 248,70943  | 202,49276 | 181,54262  | 134,66513  |
| ID585           | MD1L1,GELS            | 107,212455                                | 124,91023  | 117,814535 | 146,57801  | 145,51941  | 136,268315 | 80,311505  | 79,0294    | 78,95004   | 56,88482  | 83,718295  | 84,20695   |
| ID663           | MEPD,THOP1            | 93,18473                                  | 111,650335 | 91,729085  | 151,06737  | 165,99488  | 140,43486  | 59,157925  | 68,026255  | 62,651155  | 79,37246  | 90,67455   | 94,291215  |
| ID2669          | MLRM                  | 93,31358                                  | 103,02277  | 99,20782   | 116,209905 | 106,180285 | 99,606505  | 83,225895  | 98,483985  | 92,887735  | 71,03045  | 67,107875  | 76,687285  |
| ID1647          | MLRM                  | 102,1496                                  | 119,096375 | 119,273745 | 124,638365 | 110,677145 | 110,22416  | 97,40734   | 127,27327  | 108,47966  | 65,18016  | 59,78323   | 63,76336   |
| ID1953484       | MLRN                  | 145,79776                                 | 143,79637  | 166,77627  | 262,157175 | 191,160485 | 158,99619  | 155,289205 | 197,226595 | 176,922915 | 127,70502 | 87,18592   | 98,791675  |
| ID72360         | MLRN                  | 128,137075                                | 135,350025 | 155,94088  | 145,92414  | 137,305615 | 123,77748  | 82,139625  | 120,681405 | 120,046975 | 95,93662  | 101,581505 | 107,4052   |
| ID1041          | MP2K2                 | 111,340055                                | 123,36021  | 122,3375   | 120,513595 | 126,07141  | 125,23612  | 81,608475  | 77,785795  | 90,10729   | 3,36545   | 82,256225  | 84,4028    |
| ID1936868       | MRLC2                 | 125,753115                                | 137,66189  | 134,16837  | 700,32188  | 229,910975 | 2543,86745 | 163,13195  | 126,340075 | 127,57231  | 52,20932  | 65,454625  | 115,706245 |
| ID1706          | MRLC2,MLRM            | 99,327525                                 | 114,560545 | 112,27744  | 140,56703  | 127,792305 | 137,91366  | 147,65649  | 127,59733  | 136,65432  | 139,83278 | 117,134055 | 116,57796  |
| ID638           | MSH2                  | 108,798095                                | 112,94434  | 107,640695 | 117,84739  | 110,66633  | 120,52038  | 93,49218   | 96,40357   | 94,648865  | 103,86105 | 112,730165 | 96,073975  |
| ID508           | MSH2,GANAB            | 111,148445                                | 108,82986  | 110,66079  | 137,165195 | 147,46336  | 142,67547  | 58,659815  | 49,88638   | 55,93561   | 67,04125  | 78,418375  | 74,46453   |
| ID1630          | MTND,SSRD             | 103,138225                                | 117,090395 | 92,936195  | 134,536    | 126,647215 | 125,20993  | 63,757415  | 79,300695  | 90,71898   | 116,12278 | 96,71208   | 87,830535  |
| ID540509        | MVP                   | 108,028655                                | 107,79714  | 109,786145 | 132,79784  | 141,0097   | 131,16176  | 81,875325  | 78,414595  | 75,031055  | 67,99376  | 88,786665  | 82,745725  |
| ID487           | MVP                   | 86,30209                                  | 90,9824    | 90,970535  | 111,204475 | 120,626065 | 129,34288  | 57,333375  | 52,34758   | 47,90183   | 55,28965  | 70,961635  | 79,540625  |
| ID460           | MVP,SYAC,UBA1         | 109,95449                                 | 113,979745 | 112,70476  | 129,20204  | 138,5017   | 137,188295 | 51,927635  | 49,454765  | 53,39091   | 50,23711  | 72,46346   | 80,69045   |
| ID7894          | MVP,TIF1B,MVP         | 81,89983                                  | 87,682655  | 88,39351   | 109,671245 | 114,30139  | 130,018275 | 60,040435  | 54,22059   | 60,399955  | 58,58265  | 77,34056   | 82,916795  |
| ID197182        | MVP,UBA1              | 102,22145                                 | 104,57971  | 104,657585 | 113,274935 | 127,49106  | 135,666415 | 63,380285  | 56,16358   | 55,95264   | 52,03997  | 75,11669   | 79,41375   |
| ID17545         | MX1                   | 121,653295                                | 98,489995  | 113,63578  | 84,427715  | 116,116445 | 189,11618  | 121,7989   | 153,34368  | 140,545845 | 110,43978 | 150,45184  | 102,260835 |
| ID379418        | MYG1,SHLB1            | 104,582965                                | 125,98932  | 107,014815 | 144,532225 | 128,49453  | 131,75325  | 48,52326   | 36,273975  | 50,37527   | 55,75707  | 75,38283   | 82,17916   |
| ID31063         | MYH13,SEPT15,ACTY,OAT | 98,423835                                 | 108,665065 | 109,57591  | 123,432395 | 130,645105 | 133,42723  | 53,847765  | 60,536565  | 66,323445  | 0         | 73,45755   | 80,584805  |
| ID1755          | MYL6                  | 96,386965                                 | 110,12746  | 100,13271  | 121,23284  | 112,26287  | 114,54521  | 93,00502   | 96,466855  | 103,599585 | 87,94402  | 71,331355  | 74,480285  |

Table S-1

| ID <sup>1</sup> | Protein <sup>2</sup>   | Median of normalized volumes <sup>3</sup> |            |            |            |            |            |            |            |            |           |            |            |
|-----------------|------------------------|-------------------------------------------|------------|------------|------------|------------|------------|------------|------------|------------|-----------|------------|------------|
|                 |                        | co_0 min                                  | co_30 min  | co_60 min  | co_24 h    | co_48 h    | co_72 h    | PI_0 min   | PI_30 min  | PI_60 min  | PI_24 h   | PI_48 h    | PI_72 h    |
| ID1740          | MYL6,RLA2              | 101,275135                                | 114,041695 | 104,16645  | 123,387905 | 111,876525 | 106,66996  | 102,23783  | 94,38348   | 103,24265  | 110,42412 | 87,357555  | 90,68643   |
| ID1258          | NACA                   | 108,153705                                | 114,720635 | 116,264565 | 114,27696  | 106,59744  | 96,878     | 92,39461   | 79,148995  | 86,199595  | 135,563   | 98,867145  | 105,16279  |
| ID1254          | NACA,ANXA2             | 110,531495                                | 125,410835 | 112,81694  | 119,98913  | 105,965725 | 88,45767   | 103,182585 | 85,29024   | 99,16714   | 139,75825 | 103,52944  | 105,04718  |
| ID1205          | NAGK                   | 95,383125                                 | 105,444345 | 98,81304   | 127,262605 | 107,091335 | 96,402385  | 105,20668  | 93,88548   | 85,70793   | 81,42103  | 84,32485   | 87,382005  |
| ID405           | NASP                   | 87,301475                                 | 96,411725  | 85,465645  | 105,626725 | 114,42036  | 143,412605 | 68,339865  | 51,3219    | 59,412095  | 69,07621  | 86,15047   | 66,788105  |
| ID1645          | NDKA,BT3L4             | 98,233775                                 | 105,30684  | 103,70695  | 113,79399  | 121,46559  | 121,370815 | 83,02861   | 89,2633    | 77,93022   | 96,55462  | 98,392145  | 98,23088   |
| ID1632          | NDKA,COMD1,SODC        | 111,395555                                | 118,754355 | 115,64283  | 132,200385 | 113,370335 | 108,49177  | 62,15397   | 70,22153   | 77,19942   | 104,51204 | 88,79843   | 99,53977   |
| ID659           | NDUS1                  | 109,80471                                 | 118,37019  | 104,993635 | 121,114965 | 138,28894  | 141,91276  | 125,72456  | 123,832025 | 127,00302  | 68,57906  | 77,726515  | 66,980565  |
| ID1494          | NDUS3,HSPB1,PSB4       | 116,900165                                | 126,0295   | 129,98588  | 140,91627  | 126,802215 | 121,265245 | 96,120015  | 86,638785  | 91,511825  | 103,96412 | 102,19205  | 102,18758  |
| ID1524          | NDUV2                  | 110,165685                                | 124,493725 | 117,07831  | 103,402925 | 111,81172  | 111,5179   | 118,40458  | 123,520075 | 133,166505 | 112,14942 | 90,474375  | 81,764615  |
| ID20028         | NEBU                   | 103,202395                                | 100,40118  | 100,99458  | 133,683785 | 124,33429  | 111,907815 | 83,992845  | 81,304045  | 78,141735  | 94,17094  | 108,676475 | 101,523735 |
| ID1432          | NNMT                   | 124,986635                                | 126,392925 | 135,924125 | 118,519145 | 124,04656  | 111,084255 | 81,523245  | 91,449505  | 96,48216   | 81,02414  | 77,67003   | 73,617755  |
| ID926           | NP1L1                  | 88,668935                                 | 102,3272   | 93,880775  | 104,025635 | 98,436195  | 86,03111   | 48,2086    | 40,49217   | 55,04854   | 74,18204  | 63,60915   | 70,52472   |
| ID845           | NP1L1                  | 125,30821                                 | 96,609325  | 105,626375 | 61,74539   | 62,1141    | 65,630385  | 202,678215 | 214,39957  | 207,41278  | 173,58807 | 160,876715 | 117,163295 |
| ID929           | NP1L1,SYAP1            | 80,279175                                 | 94,87891   | 89,07973   | 103,77243  | 87,89002   | 81,068805  | 41,303125  | 35,640165  | 50,86771   | 73,83915  | 65,35227   | 75,804195  |
| ID2404447       | NP1L4                  | 128,573145                                | 96,486605  | 116,752195 | 73,15063   | 69,130185  | 61,31076   | 190,99681  | 210,55482  | 200,071615 | 154,38892 | 159,625835 | 122,61703  |
| ID846           | NP1L4                  | 141,25743                                 | 98,36416   | 116,26769  | 65,192585  | 59,887745  | 59,37413   | 228,077355 | 240,96778  | 235,72471  | 184,22187 | 172,824195 | 128,55674  |
| ID842           | NP1L4                  | 136,431835                                | 93,49081   | 111,072655 | 61,379925  | 55,95636   | 54,147875  | 238,85271  | 255,886515 | 249,29743  | 186,72666 | 175,99665  | 130,26913  |
| ID1209          | NPM                    | 97,51595                                  | 105,42086  | 99,985445  | 110,710765 | 113,43727  | 90,425315  | 115,43896  | 95,49721   | 86,55524   | 98,65601  | 94,1613    | 108,627905 |
| ID1200          | NPM                    | 93,791825                                 | 97,459275  | 93,28613   | 108,93663  | 104,266265 | 86,66284   | 55,63105   | 67,987075  | 63,490125  | 93,37123  | 89,885465  | 98,523755  |
| ID1224          | NPM                    | 92,895745                                 | 126,82514  | 83,775215  | 143,123    | 93,94151   | 59,1223    | 73,011155  | 48,259065  | 73,0794    | 97,09744  | 121,25841  | 124,0548   |
| ID1225          | NPM,EF1D               | 88,18576                                  | 87,924315  | 101,59805  | 134,091465 | 96,205255  | 66,709945  | 114,294875 | 84,38836   | 102,444865 | 122,17261 | 91,63221   | 106,755445 |
| ID50273         | NSAP,CALR              | 69,827135                                 | 64,900695  | 65,528845  | 82,599285  | 83,591505  | 87,435995  | 186,27014  | 178,51856  | 188,296955 | 104,90164 | 113,174565 | 89,519145  |
| ID3227          | NUCB1,VIME             | 123,967605                                | 100,82282  | 127,7094   | 91,29247   | 90,63104   | 86,736145  | 193,59683  | 254,357995 | 207,841465 | 193,90176 | 159,18014  | 130,508215 |
| ID520           | NUCL                   | 86,314545                                 | 84,894615  | 85,16088   | 118,001505 | 123,994405 | 137,204405 | 55,395805  | 40,138735  | 48,574835  | 59,05825  | 75,655     | 72,14311   |
| ID1364          | NUDT5,ANXA5,SFRS2      | 88,125155                                 | 97,53695   | 87,85583   | 113,730585 | 116,15961  | 112,63986  | 63,639475  | 60,406385  | 70,48728   | 94,84711  | 87,90766   | 91,071215  |
| ID1776          | OAT                    | 109,769525                                | 121,004375 | 116,40533  | 136,2638   | 113,869205 | 93,64105   | 80,7897    | 93,770815  | 95,66757   | 121,61389 | 86,10186   | 88,66302   |
| ID970           | ODO2                   | 82,16804                                  | 92,407425  | 89,76152   | 137,653625 | 108,042095 | 132,67247  | 49,06888   | 51,2309    | 59,51695   | 48,87313  | 59,27437   | 69,58617   |
| ID1255          | ODPB                   | 103,362795                                | 118,11586  | 113,776855 | 118,88195  | 119,313605 | 116,547765 | 94,65876   | 90,357125  | 91,00923   | 79,44157  | 77,010965  | 76,502115  |
| ID1282          | ODPB,CSN6,GBB2,GBB1    | 114,65877                                 | 126,199715 | 119,954    | 147,465725 | 159,52693  | 156,53016  | 111,052715 | 118,0466   | 108,91506  | 59,02264  | 76,60582   | 78,73447   |
| ID1321          | OTUB1                  | 123,90914                                 | 137,34954  | 142,50579  | 112,60729  | 120,67965  | 94,90845   | 75,03832   | 73,52663   | 85,306805  | 97,94251  | 94,636945  | 88,601305  |
| ID1312          | OTUB1                  | 96,668125                                 | 98,15916   | 102,58626  | 123,464905 | 130,81535  | 116,763785 | 54,008625  | 46,729415  | 64,78598   | 73,13809  | 82,800025  | 85,811065  |
| ID319168        | OXR                    | 144,960715                                | 162,7822   | 148,537775 | 164,82593  | 143,73832  | 134,994525 | 119,705415 | 115,17928  | 126,399985 | 153,77428 | 114,03666  | 97,864285  |
| ID2818369       | P3H1                   | 131,35512                                 | 137,209385 | 143,3885   | 134,950935 | 130,828115 | 104,582925 | 68,56556   | 56,59821   | 70,173025  | 102,64138 | 91,394085  | 92,11789   |
| ID4295          | P3H1                   | 134,702705                                | 146,64593  | 145,352545 | 129,55633  | 125,62167  | 116,321605 | 87,64216   | 71,59371   | 84,56      | 127,19621 | 85,329855  | 85,34377   |
| ID564           | P3H2,KU86,HS90A        | 109,887175                                | 110,896305 | 122,61177  | 130,174895 | 126,27058  | 124,993795 | 110,627995 | 95,285225  | 118,66564  | 100,39144 | 92,027265  | 93,341705  |
| ID558           | P3H3                   | 89,999765                                 | 106,32875  | 90,528415  | 115,545045 | 127,95848  | 139,911015 | 94,15387   | 83,616895  | 89,00055   | 19,07457  | 79,596995  | 84,567365  |
| ID813           | P4HA1,TCPA,PDIA3,CPNE2 | 125,62708                                 | 127,15037  | 132,924855 | 125,798515 | 110,38066  | 109,616685 | 160,366465 | 193,925085 | 179,8896   | 153,11399 | 135,50004  | 100,633455 |
| ID812           | P4HA2,CPNE1            | 97,04151                                  | 108,13129  | 102,15902  | 130,894655 | 119,88048  | 117,955845 | 96,10828   | 94,363625  | 107,26528  | 116,10937 | 90,586295  | 89,585415  |
| ID1412          | PA1B2,PSME1,DDAH2      | 115,109985                                | 124,54593  | 122,53049  | 132,427435 | 133,458305 | 130,678155 | 90,599915  | 83,260535  | 103,25084  | 96,16658  | 96,13162   | 99,87751   |
| ID1032          | PA2G4,SAHH,ILEU        | 120,719335                                | 124,012745 | 124,779495 | 142,444575 | 139,96111  | 130,71813  | 52,843395  | 51,24035   | 65,282805  | 0,033635  | 75,802565  | 87,947015  |
| ID17391         | PAK2,PDIA3             | 98,323055                                 | 99,964975  | 101,654135 | 105,362865 | 105,173045 | 94,81304   | 92,83751   | 95,595365  | 95,7223    | 93,9124   | 97,51677   | 95,88022   |
| ID399832        | PAK2,PDIA3             | 104,125125                                | 107,599825 | 112,022135 | 103,96024  | 98,481235  | 104,992135 | 113,241575 | 123,03186  | 137,302165 | 104,87083 | 98,46351   | 80,740045  |
| ID1511          | PAK7                   | 109,71956                                 | 121,44594  | 115,410455 | 126,46992  | 123,144215 | 124,799205 | 62,63613   | 62,01608   | 70,174465  | 62,950205 | 89,342365  | 89,596745  |
| ID1304          | PCNA                   | 105,54681                                 | 111,55669  | 109,888315 | 125,90615  | 141,217495 | 137,888155 | 69,270035  | 58,766135  | 75,4695    | 85,65131  | 91,27522   | 78,982645  |
| ID1328          | PCNA,CX026,AN32E       | 72,27044                                  | 73,167855  | 72,5756    | 98,275275  | 114,5453   | 114,79671  | 56,72688   | 44,596565  | 60,082965  | 92,75055  | 92,455015  | 82,623415  |
| ID99319         | PDIA1                  | 116,819235                                | 124,31853  | 117,35995  | 114,580575 | 112,332845 | 109,54823  | 111,83056  | 117,77718  | 115,53436  | 107,62788 | 98,426245  | 90,027655  |
| ID824           | PDIA1                  | 70,154905                                 | 73,79069   | 73,689105  | 75,6022    | 83,75515   | 89,764445  | 87,177305  | 88,790195  | 94,07053   | 142,71697 | 87,041065  | 80,37446   |
| ID230824        | PDIA1                  | 90,13302                                  | 91,382335  | 127,79347  | 90,00562   | 123,36711  | 123,83671  | 117,432135 | 138,83287  | 152,35692  | 103,6119  | 83,211745  | 90,96413   |
| ID820           | PDIA1                  | 95,878815                                 | 98,443725  | 94,40794   | 100,54184  | 112,627945 | 101,94401  | 104,44452  | 97,567935  | 99,87562   | 113,26881 | 92,694895  | 80,312945  |
| ID2239          | PDIA1                  | 39,294685                                 | 40,88196   | 41,606585  | 59,70128   | 60,26962   | 70,42288   | 63,22694   | 62,082935  | 66,71734   | 183,04104 | 85,81699   | 81,54254   |
| ID451640        | PDIA3                  | 133,1189                                  | 94,897305  | 120,07308  | 98,575005  | 102,451975 | 131,684325 | 173,82686  | 134,38324  | 133,099545 | 156,77576 | 101,71275  | 95,542965  |
| ID854           | PDIA3,HNRPF,VATB2      | 74,388145                                 | 80,87528   | 75,731335  | 83,39727   | 88,76929   | 103,40568  | 90,630875  | 84,1349    | 93,80482   | 129,76688 | 83,39729   | 81,220285  |
| ID17374         | PDIA3,PEPD,TBA1A       | 122,85605                                 | 102,58295  | 123,045795 | 113,751565 | 118,37146  | 118,00765  | 154,696065 | 178,577995 | 159,34358  | 134,21085 | 114,16164  | 104,763945 |
| ID836           | PDIA3,TBA1B            | 131,56153                                 | 99,66647   | 133,26297  | 69,006235  | 73,124045  | 81,53773   | 232,58061  | 271,884915 | 226,435225 | 145,36455 | 126,86215  | 104,57924  |
| ID865           | PDIA3,TBA1B            | 124,30701                                 | 133,454025 | 126,00208  | 107,05642  | 109,52916  | 116,28257  | 136,11122  | 132,378945 | 102,48049  | 76,744685 | 78,818355  | 78,818355  |
| ID864           | PDIA3,VATB2            | 59,46478                                  | 63,608875  | 63,17621   | 91,31856   | 90,841305  | 111,149555 | 77,41689   | 62,64748   | 72,685395  | 128,59361 | 82,353575  | 78,4674    |

Table S-1

| ID <sup>1</sup> | Protein <sup>2</sup>         | Median of normalized volumes <sup>3</sup> |            |            |            |            |            |            |            |            |           |            |            |
|-----------------|------------------------------|-------------------------------------------|------------|------------|------------|------------|------------|------------|------------|------------|-----------|------------|------------|
|                 |                              | co_0 min                                  | co_30 min  | co_60 min  | co_24 h    | co_48 h    | co_72 h    | PI_0 min   | PI_30 min  | PI_60 min  | PI_24 h   | PI_48 h    | PI_72 h    |
| ID660           | PDIA4                        | 127,5737                                  | 102,619925 | 119,847555 | 71,495595  | 50,86444   | 89,349735  | 160,54442  | 157,860255 | 161,95198  | 122,14481 | 146,926555 | 133,140465 |
| ID370380        | PDIA4                        | 81,825065                                 | 78,87163   | 91,003555  | 88,776805  | 81,23932   | 74,98199   | 120,187095 | 134,088435 | 129,86416  | 101,79991 | 114,483175 | 111,634795 |
| ID22159         | PDIA4,HSP71,ANXA6,TF65,GRP75 | 95,29908                                  | 83,456825  | 92,913445  | 71,463575  | 57,72285   | 69,582685  | 128,770165 | 133,548695 | 132,64408  | 170,31327 | 172,152395 | 142,214755 |
| ID982           | PDIA6                        | 63,761615                                 | 70,711895  | 69,22459   | 77,501125  | 80,36838   | 88,51096   | 88,433935  | 86,652045  | 99,881655  | 125,86458 | 80,951885  | 86,13748   |
| ID176254        | PDIA6,F10A1,PABP2,PRS6B      | 95,607005                                 | 106,632275 | 95,910525  | 101,85588  | 102,45521  | 103,05947  | 71,51298   | 67,164905  | 73,63045   | 82,77913  | 78,62029   | 79,368625  |
| ID1784          | PEA15                        | 105,943585                                | 118,585135 | 101,64145  | 124,44321  | 124,28236  | 126,399255 | 35,4076    | 36,12181   | 59,8695    | 72,23945  | 72,59083   | 74,691475  |
| ID450085        | PEPD,PDIA3,TBA1B             | 96,342085                                 | 102,773985 | 95,22645   | 118,89107  | 109,418215 | 135,39376  | 104,0611   | 92,517505  | 99,93916   | 124,63893 | 119,056235 | 110,370085 |
| ID810           | PEPD,PDIA3,TBA1B             | 101,830135                                | 102,046225 | 92,245225  | 96,99557   | 108,124385 | 97,560555  | 102,785335 | 95,3944    | 93,726285  | 110,95884 | 90,286355  | 88,07965   |
| ID1522          | PFDF3                        | 111,87283                                 | 128,11715  | 118,49048  | 137,908455 | 126,595655 | 115,437325 | 75,132175  | 75,642865  | 78,18218   | 77,772675 | 93,710685  | 89,3352    |
| ID1746          | PFDF5                        | 113,631105                                | 119,116385 | 118,23592  | 131,428415 | 118,581605 | 108,97632  | 86,61102   | 84,790265  | 87,597555  | 121,99891 | 82,68294   | 77,413575  |
| ID1468          | PHB,HSPB1                    | 83,140805                                 | 85,30102   | 85,14586   | 107,351535 | 101,941255 | 111,62085  | 111,448325 | 121,359655 | 117,956235 | 86,7754   | 71,64494   | 64,841265  |
| ID16655         | PHP14                        | 101,25266                                 | 116,689285 | 104,227255 | 105,43377  | 186,8931   | 153,01901  | 63,85154   | 74,767685  | 79,52881   | 54,94822  | 121,137135 | 271,12135  |
| ID25674         | PLOD3                        | 91,570605                                 | 95,8598    | 96,91669   | 89,728695  | 90,76147   | 111,489835 | 102,31248  | 92,376155  | 106,252805 | 121,44448 | 74,60981   | 81,72364   |
| ID371745        | PLST,AMP2M,CPNE1,COR1B       | 122,886695                                | 116,88176  | 128,409955 | 108,490905 | 99,964245  | 126,582195 | 84,62894   | 100,46576  | 93,97371   | 95,65982  | 124,027465 | 105,680125 |
| ID798           | PNCB,FKBP4,TCPE,TCPQ,HDAC2   | 110,82288                                 | 117,665355 | 113,275115 | 137,404325 | 125,940875 | 115,305745 | 71,55722   | 65,619035  | 71,6885    | 92,163    | 88,43521   | 93,778725  |
| ID1443          | PNPO                         | 101,68788                                 | 110,798545 | 105,02612  | 116,29279  | 107,561865 | 109,605775 | 66,19815   | 77,75611   | 84,25103   | 18,437955 | 81,315765  | 85,19774   |
| ID534785        | PP1A                         | 106,924355                                | 116,794685 | 116,681045 | 114,37988  | 105,16261  | 111,23662  | 59,74885   | 63,197685  | 69,45707   | 78,27798  | 86,48426   | 86,48426   |
| ID1272          | PP1A                         | 66,265805                                 | 80,689805  | 57,655275  | 116,79723  | 85,62816   | 97,064965  | 59,78323   | 69,454425  | 75,07676   | 27,84084  | 70,81786   | 71,494505  |
| ID1331          | PP1A,DHC3                    | 118,02139                                 | 133,45356  | 136,287085 | 102,06771  | 107,577345 | 111,02663  | 80,644675  | 116,91253  | 95,620745  | 68,78877  | 85,597655  | 84,402385  |
| ID1186          | PP1B,NAGK                    | 111,039105                                | 124,1509   | 120,07581  | 129,52815  | 106,505025 | 103,19859  | 102,78647  | 109,24179  | 94,07157   | 95,97127  | 88,970205  | 98,31138   |
| ID1030          | PP1R7,IF4A1                  | 126,709325                                | 140,328585 | 136,165815 | 138,136095 | 150,71082  | 146,900185 | 56,60696   | 58,514665  | 62,261735  | 73,76849  | 84,132425  | 84,34823   |
| ID1252          | PP2AA,ACTG,ANXA2             | 96,98864                                  | 105,342205 | 111,598005 | 114,14415  | 99,94927   | 109,857315 | 87,367735  | 95,748435  | 95,029695  | 87,96512  | 87,75165   | 94,305325  |
| ID1241          | PP2AB,CT077                  | 101,732535                                | 109,914445 | 110,82194  | 126,72802  | 114,15067  | 108,50645  | 83,697105  | 74,55044   | 81,62649   | 92,95755  | 91,470365  | 94,03015   |
| ID1316          | PP4C,EF1D                    | 109,250655                                | 127,629075 | 104,67897  | 96,38084   | 97,443405  | 96,53332   | 83,36981   | 78,430795  | 79,74484   | 99,3726   | 79,512505  | 81,799925  |
| ID2382844       | PPM1G                        | 106,79038                                 | 101,95479  | 108,897125 | 121,908615 | 127,888525 | 118,65015  | 66,23745   | 67,208305  | 69,983165  | 94,48362  | 80,71481   | 62,337185  |
| ID1060          | PPME1                        | 120,37434                                 | 126,51582  | 135,299445 | 151,71643  | 136,07957  | 131,170525 | 92,00097   | 82,017065  | 91,519975  | 86,67675  | 80,925825  | 87,403435  |
| ID844           | PPP5,RHGO1                   | 107,41728                                 | 115,10957  | 119,76606  | 114,465585 | 103,354665 | 103,989475 | 72,818805  | 83,964295  | 82,29256   | 99,11488  | 82,768005  | 86,589505  |
| ID1249          | PPP6                         | 100,4087                                  | 130,03249  | 117,98513  | 102,903005 | 99,02036   | 107,93433  | 67,1304    | 85,14055   | 80,498895  | 88,49611  | 88,451395  | 98,514115  |
| ID1243          | PPP6,LDHB,PDXK               | 120,429275                                | 116,06084  | 133,9024   | 105,12008  | 107,043175 | 108,45274  | 57,71698   | 60,844165  | 68,28156   | 78,05838  | 73,68932   | 82,98301   |
| ID1296          | PPP6,PGP,CAZA2               | 125,06775                                 | 121,805395 | 139,57516  | 104,195015 | 105,089875 | 111,151865 | 60,07597   | 74,49097   | 72,30736   | 69,53055  | 60,199955  | 66,056865  |
| ID2198480       | PPT1                         | 133,577465                                | 150,53858  | 155,250715 | 289,995265 | 729,548225 | 379,316545 | 95,87643   | 79,34198   | 65,49324   | 0         | 0          | 1,957565   |
| ID3102815       | PR56A,TXND5                  | 99,55876                                  | 116,8937   | 108,6874   | 117,300605 | 115,985625 | 128,39217  | 91,50126   | 83,061265  | 78,4633    | 109,58481 | 78,32334   | 77,63937   |
| ID177384        | PR56A,TXND5                  | 126,06852                                 | 146,475475 | 150,693655 | 138,84095  | 133,57958  | 116,56032  | 77,94517   | 68,482595  | 68,189505  | 95,726    | 87,75522   | 84,71873   |
| ID1541          | PRDX2,GSTP1                  | 105,863845                                | 116,48139  | 109,39538  | 116,23451  | 119,65452  | 132,67535  | 39,159575  | 39,69429   | 38,013745  | 66,92868  | 77,894635  | 79,38837   |
| ID1510          | PRDX3                        | 106,995185                                | 123,206485 | 122,22205  | 124,6202   | 126,64329  | 133,516975 | 44,815985  | 40,86548   | 48,890525  | 0,92952   | 67,38631   | 74,05431   |
| ID584346        | PRDX3,HSPB1                  | 109,69096                                 | 120,594015 | 117,400275 | 114,001235 | 119,11324  | 126,03524  | 38,596625  | 47,198395  | 58,62272   | 70,94781  | 85,27138   | 91,078035  |
| ID1497          | PRDX4                        | 123,909655                                | 134,50746  | 136,59139  | 123,197605 | 121,847575 | 125,7833   | 52,04898   | 82,946805  | 79,140225  | 116,49895 | 110,207985 | 119,71593  |
| ID3056834       | PRDX4                        | 137,498445                                | 148,632935 | 142,824045 | 101,095135 | 101,547985 | 55,222525  | 77,577945  | 107,81489  | 107,785555 | 148,0632  | 117,0544   | 118,957775 |
| ID16864         | PRDX4                        | 61,821855                                 | 68,65892   | 61,45066   | 110,774575 | 92,639375  | 105,184615 | 62,64804   | 53,60487   | 67,02808   | 106,04587 | 86,3639    | 91,95951   |
| ID1471          | PRDX4                        | 93,83494                                  | 108,5148   | 99,65398   | 108,89388  | 95,174535  | 88,88084   | 98,53782   | 120,72301  | 119,600605 | 129,33034 | 86,936285  | 81,921225  |
| ID1802          | PROF2,TR112                  | 128,346875                                | 143,6517   | 138,119775 | 147,315955 | 198,050345 | 150,458445 | 85,89075   | 87,264085  | 97,31836   | 87,62207  | 98,10084   | 127,53878  |
| ID469498        | PRS4,SYWC                    | 110,73022                                 | 105,741405 | 120,123695 | 98,442745  | 98,06643   | 108,35831  | 148,019895 | 168,77284  | 162,95412  | 111,43591 | 91,114665  | 92,177695  |
| ID1002          | PRS6A                        | 103,63856                                 | 116,416375 | 106,21356  | 125,22575  | 114,995385 | 110,64495  | 79,797885  | 68,51339   | 70,16351   | 99,69526  | 81,207135  | 81,191295  |
| ID997           | PRST                         | 109,6916                                  | 119,273495 | 116,010395 | 141,83456  | 124,018585 | 121,263735 | 84,15451   | 66,44102   | 76,463305  | 91,16458  | 83,743095  | 87,07761   |
| ID172969        | PSA3,TPD54                   | 106,66479                                 | 115,199925 | 111,916265 | 125,562815 | 121,14112  | 123,2719   | 71,588645  | 68,220075  | 71,739115  | 83,59725  | 89,40346   | 100,91025  |
| ID1476          | PSA5                         | 94,761985                                 | 99,361845  | 97,977995  | 111,77623  | 119,165025 | 118,768545 | 73,98328   | 67,63981   | 67,890495  | 93,70505  | 92,59164   | 101,79124  |
| ID16938         | PSB4                         | 83,21554                                  | 93,38514   | 86,217055  | 143,634185 | 117,81884  | 117,961055 | 88,912085  | 85,27848   | 82,45416   | 180,11916 | 102,22785  | 99,269185  |
| ID3058865       | PSB6                         | 123,45137                                 | 133,33376  | 125,961185 | 99,699495  | 109,431825 | 124,711103 | 112,968965 | 99,171485  | 98,37257   | 69,16042  | 77,09932   | 70,03763   |
| ID1402          | PSB7                         | 120,83483                                 | 136,977925 | 134,3655   | 153,079335 | 128,240345 | 123,042555 | 91,184115  | 79,236685  | 87,448185  | 96,40822  | 96,456185  | 105,245095 |
| ID1460          | PSB7                         | 103,65405                                 | 111,916445 | 115,87671  | 104,90591  | 103,32547  | 111,958385 | 114,45864  | 136,25803  | 126,93489  | 101,68675 | 88,90022   | 85,616405  |
| ID1519          | PSD10                        | 110,97222                                 | 121,920625 | 117,36009  | 129,710955 | 125,478305 | 123,936765 | 72,9118    | 77,837175  | 86,798175  | 110,70106 | 95,232725  | 99,72005   |
| ID1140          | PSD13                        | 121,08545                                 | 114,973585 | 142,05416  | 102,513085 | 108,747465 | 114,18186  | 77,976085  | 62,327215  | 66,09693   | 62,14334  | 63,636645  | 70,623815  |
| ID1244          | PSDE                         | 116,09945                                 | 129,47189  | 124,61628  | 125,31013  | 121,787715 | 121,372725 | 92,777175  | 81,8346    | 87,945085  | 50,47915  | 87,587415  | 87,56264   |
| ID566           | PSMD2                        | 89,034875                                 | 91,49321   | 94,12836   | 109,05688  | 96,395145  | 96,666355  | 53,577355  | 44,129235  | 52,56442   | 74,01722  | 68,841855  | 80,10025   |
| ID276677        | PSMD4                        | 105,472485                                | 163,67549  | 114,782925 | 178,08277  | 201,07812  | 142,005535 | 100,8158   | 82,76272   | 79,717305  | 62,5366   | 92,0593    | 107,510875 |
| ID955           | PSMD5,SH3G1                  | 130,197995                                | 138,020355 | 134,112735 | 161,66785  | 156,35356  | 144,12045  | 68,335015  | 81,103845  | 110,60133  | 83,37508  | 92,64086   | 83,26756   |
| ID954           | PSMD5,SH3G1                  | 134,946115                                | 123,124285 | 157,36733  | 130,795915 | 138,762    | 128,998885 | 81,93008   | 65,85993   | 90,83708   | 65,98606  | 80,944295  | 84,809185  |

Table S-1

| ID <sup>1</sup> | Protein <sup>2</sup>   | Median of normalized volumes <sup>3</sup> |            |            |            |            |            |            |            |            |           |            |            |
|-----------------|------------------------|-------------------------------------------|------------|------------|------------|------------|------------|------------|------------|------------|-----------|------------|------------|
|                 |                        | co_0 min                                  | co_30 min  | co_60 min  | co_24 h    | co_48 h    | co_72 h    | PI_0 min   | PI_30 min  | PI_60 min  | PI_24 h   | PI_48 h    | PI_72 h    |
| ID907           | PSMD5, TXND5           | 82,69473                                  | 82,32863   | 92,03621   | 104,041405 | 101,43464  | 116,30184  | 92,26588   | 87,06506   | 89,171635  | 93,64137  | 84,364135  | 88,58941   |
| ID1433          | PSME1,6PGL,ERP29       | 99,233445                                 | 107,29279  | 104,865385 | 89,85611   | 87,95466   | 100,752215 | 91,59247   | 94,88568   | 97,60142   | 136,2215  | 83,90839   | 81,95661   |
| ID1392          | PSME2                  | 103,89938                                 | 101,9394   | 116,082795 | 101,7192   | 122,62001  | 128,156265 | 56,57135   | 50,080195  | 60,597455  | 73,84066  | 77,39895   | 73,60516   |
| ID3313934       | PSME2,1433E            | 118,107265                                | 113,25819  | 127,45944  | 123,891635 | 120,37339  | 127,74425  | 74,65441   | 60,3621    | 75,57591   | 216,95407 | 141,39646  | 138,584975 |
| ID1373          | PSME2,1433E,PHB,1433Z  | 110,489895                                | 115,286625 | 121,352575 | 97,33692   | 104,62131  | 113,67391  | 114,42304  | 111,813885 | 125,29877  | 177,32055 | 81,322805  | 80,61155   |
| ID1409          | PSME2,CLIC4            | 122,83746                                 | 124,73231  | 139,42729  | 136,560255 | 144,401065 | 143,015085 | 56,517685  | 62,968625  | 70,428985  | 85,3662   | 88,9922    | 97,801535  |
| ID1396          | PSME3,GSTO1            | 104,16194                                 | 123,888995 | 116,88715  | 114,33295  | 121,681865 | 124,937145 | 65,72509   | 81,868005  | 84,67264   | 85,67739  | 92,89434   | 100,917235 |
| ID458579        | PUR4                   | 107,936225                                | 117,66807  | 114,512385 | 152,8932   | 138,86892  | 131,65893  | 82,21557   | 64,408815  | 79,00715   | 71,8888   | 81,44725   | 83,48611   |
| ID3435858       | QCR1                   | 145,420975                                | 108,176235 | 124,70041  | 126,0504   | 152,89496  | 95,347375  | 87,38864   | 42,12074   | 69,771685  | 62,20935  | 1826,11282 | 132,539675 |
| ID714           | RANB3                  | 148,589345                                | 95,934475  | 152,867325 | 62,93775   | 64,273655  | 50,44118   | 252,21722  | 295,52942  | 283,92726  | 173,58004 | 169,928155 | 126,074265 |
| ID1446          | RANG,PSA3              | 103,649785                                | 117,59076  | 103,68525  | 114,24166  | 110,50683  | 117,75525  | 59,539535  | 64,759415  | 72,8355    | 68,86046  | 64,63208   | 67,98964   |
| ID932           | RBBP4                  | 95,767265                                 | 106,65236  | 96,308275  | 124,653805 | 118,67156  | 117,350545 | 113,10438  | 102,47742  | 102,76783  | 72,53909  | 81,67369   | 74,33916   |
| ID1604          | RBMA8                  | 142,16532                                 | 169,91537  | 136,598975 | 127,65509  | 120,009385 | 114,5316   | 109,65879  | 82,951355  | 81,65969   | 56,64557  | 64,23401   | 27,904685  |
| ID1586          | RBMA8                  | 99,097265                                 | 119,877035 | 106,235425 | 131,101615 | 127,193205 | 132,32744  | 101,07464  | 96,75225   | 91,022425  | 79,50646  | 93,57226   | 87,715765  |
| ID2662678       | RCN1                   | 78,55588                                  | 93,24772   | 81,93276   | 71,889365  | 80,687995  | 87,594505  | 90,977335  | 85,940245  | 101,97293  | 112,43859 | 84,21475   | 81,43941   |
| ID280677        | RCN1                   | 78,870305                                 | 82,21975   | 77,66271   | 70,419955  | 80,397275  | 103,520755 | 89,174765  | 102,93082  | 100,99383  | 140,64662 | 91,66706   | 93,413525  |
| ID2687300       | RCN1                   | 70,291485                                 | 76,96989   | 71,336005  | 50,634905  | 61,362905  | 88,72084   | 87,531655  | 88,70634   | 97,85226   | 110,25728 | 83,478875  | 88,254095  |
| ID55507         | RCN1                   | 83,155705                                 | 92,00353   | 83,660775  | 93,2433    | 91,20634   | 109,390935 | 95,93322   | 93,144365  | 105,730055 | 110,64906 | 80,20923   | 78,783735  |
| ID459           | RCN1                   | 79,99439                                  | 84,658605  | 78,713455  | 108,05688  | 100,121615 | 105,84377  | 51,268265  | 34,981155  | 44,41851   | 49,71831  | 70,29365   | 70,448345  |
| ID1061          | RCN1,ACTG              | 102,1393                                  | 120,155515 | 105,62752  | 93,820165  | 100,65686  | 98,806335  | 93,86795   | 93,88778   | 114,448285 | 93,88778  | 80,68619   | 79,076395  |
| ID1127          | RCN1,SPRC              | 106,20693                                 | 112,229    | 109,77198  | 105,17646  | 110,89347  | 129,624105 | 95,114125  | 112,861585 | 104,10035  | 123,67739 | 81,25273   | 77,970095  |
| ID2680471       | RCN1,SPRC              | 92,13064                                  | 103,725555 | 92,18002   | 84,221265  | 87,45377   | 111,21924  | 95,24782   | 103,0901   | 104,933425 | 130,74152 | 81,53274   | 86,717155  |
| ID1825144       | RCN2                   | 105,18952                                 | 119,44726  | 107,52512  | 105,36874  | 101,75409  | 82,133925  | 129,035375 | 157,60411  | 131,59355  | 84,48335  | 78,90923   | 65,86483   |
| ID935           | RD23A                  | 99,285                                    | 120,26754  | 108,471965 | 134,63193  | 170,60037  | 136,189935 | 49,69347   | 49,8043    | 62,934325  | 72,91175  | 80,6064    | 73,929695  |
| ID3128108       | RD23B                  | 124,880385                                | 69,743005  | 115,54939  | 57,87854   | 49,446775  | 52,70732   | 258,54656  | 311,78497  | 259,821865 | 194,45784 | 191,902815 | 142,5744   |
| ID94683         | RD23B                  | 99,445755                                 | 103,067785 | 107,49125  | 103,85378  | 108,48195  | 128,41767  | 130,759355 | 156,88764  | 137,343295 | 136,86305 | 99,245345  | 85,77356   |
| ID99730         | RD23B,PDIA1            | 103,403635                                | 103,34606  | 101,44057  | 101,056135 | 108,57143  | 101,878915 | 109,357985 | 103,170865 | 98,239305  | 105,80378 | 82,5591    | 70,109605  |
| ID1367          | RFA2                   | 115,26994                                 | 122,099375 | 125,239825 | 105,470255 | 123,53351  | 128,7397   | 99,073475  | 98,420235  | 104,206225 | 0         | 102,863685 | 100,98432  |
| ID1375          | RFA2                   | 117,16934                                 | 131,04903  | 130,38104  | 164,54349  | 153,57252  | 155,928945 | 78,449245  | 73,08301   | 85,40367   | 68,58281  | 75,161885  | 79,58116   |
| ID1146          | RFC2                   | 131,51075                                 | 145,16747  | 152,012925 | 135,28749  | 131,975645 | 145,858465 | 81,40249   | 66,39416   | 84,559715  | 0,036235  | 98,85021   | 96,931225  |
| ID851           | RHG01                  | 141,279365                                | 104,214045 | 117,157545 | 71,957845  | 67,0879    | 69,775455  | 234,16479  | 239,130605 | 234,85226  | 181,24806 | 172,4      | 130,13306  |
| ID922           | RHG01,HNRH2            | 94,571275                                 | 102,906335 | 106,208895 | 127,983945 | 113,88663  | 121,662575 | 63,060965  | 53,880645  | 59,87421   | 12,84439  | 68,416435  | 74,91266   |
| ID1005          | RINI                   | 123,95066                                 | 136,285025 | 126,45136  | 173,41188  | 173,933315 | 148,878005 | 40,772775  | 46,606265  | 59,91757   | 67,05789  | 85,76277   | 103,02331  |
| ID1248          | RLA0                   | 106,350945                                | 117,48712  | 118,89529  | 123,488875 | 110,89936  | 110,425195 | 94,3698    | 93,488915  | 94,297095  | 103,10273 | 78,332845  | 87,963265  |
| ID1098          | RSSA                   | 132,905825                                | 143,218705 | 151,347135 | 137,45149  | 119,38672  | 102,595775 | 119,65832  | 115,846995 | 109,53807  | 130,7853  | 96,035725  | 92,16642   |
| ID1156          | RSSA,SET               | 89,982795                                 | 101,671785 | 88,19172   | 85,407925  | 86,22599   | 99,719545  | 75,026735  | 71,98729   | 80,721185  | 74,04095  | 62,739025  | 58,33773   |
| ID949           | RUVB2,NEMO             | 101,406775                                | 107,875565 | 110,163765 | 110,881035 | 105,673855 | 107,51892  | 89,364545  | 76,25924   | 85,85567   | 85,78328  | 82,36863   | 84,148175  |
| ID357613        | SAE1,ACTG,TMOD3        | 103,333345                                | 106,59616  | 107,339505 | 112,4153   | 110,101715 | 105,46554  | 75,206645  | 60,05108   | 64,538825  | 74,87233  | 76,27892   | 74,65236   |
| ID1277          | SAE1,EF1D              | 93,79593                                  | 104,387305 | 94,864155  | 87,065635  | 84,35151   | 87,566875  | 83,064885  | 70,866985  | 73,31561   | 81,11109  | 70,22585   | 68,57242   |
| ID1042          | SAHH                   | 88,39115                                  | 90,45175   | 87,79727   | 109,866185 | 110,985365 | 111,541835 | 46,046855  | 44,61768   | 56,79728   | 64,33193  | 72,96663   | 85,357115  |
| ID3228910       | SAKS1,SAE1             | 104,58526                                 | 105,28229  | 103,750055 | 105,5346   | 103,040155 | 96,301505  | 62,216355  | 59,88184   | 72,546305  | 107,71771 | 95,128065  | 104,372905 |
| ID703           | SCFD1                  | 112,95461                                 | 106,648105 | 115,730585 | 104,935605 | 95,346605  | 94,45132   | 144,452205 | 151,320435 | 141,903625 | 332,15153 | 143,271315 | 115,84714  |
| ID1093          | SCMC1,ILEU             | 113,99539                                 | 125,953935 | 124,921575 | 140,88356  | 143,353865 | 142,812405 | 53,739555  | 49,95845   | 69,129455  | 0,08462   | 90,61496   | 89,090175  |
| ID418384        | SCMC1,TADBP,PPME1,ACTG | 100,820095                                | 107,31552  | 114,47639  | 87,63967   | 112,56961  | 115,142495 | 99,360355  | 85,18938   | 112,23633  | 76,04436  | 54,67262   | 62,937435  |
| ID937           | SCRN1                  | 96,684085                                 | 109,835335 | 93,72714   | 128,88687  | 135,970935 | 136,89552  | 45,213665  | 44,52698   | 54,208635  | 50,53299  | 72,243875  | 83,32729   |
| ID697           | SDC10,AGM1,NDUS1,WDR72 | 110,50713                                 | 97,549265  | 99,03971   | 66,692285  | 59,8625    | 74,505115  | 157,370475 | 152,676235 | 141,250835 | 122,26538 | 153,92975  | 135,206625 |
| ID1215          | SEC13                  | 115,98761                                 | 118,921295 | 120,60693  | 119,61696  | 103,81845  | 108,605965 | 128,89128  | 117,24424  | 81,92575   | 77,652935 | 76,73474   | 77,73833   |
| ID921           | SEPT8,HNRH1            | 103,34458                                 | 110,127325 | 100,981345 | 126,845605 | 135,29366  | 137,533455 | 82,850195  | 68,618535  | 67,39088   | 69,96492  | 73,275985  | 81,648715  |
| ID1142          | SET                    | 92,681865                                 | 94,44646   | 100,51275  | 127,506515 | 113,23224  | 134,1815   | 67,53447   | 50,37757   | 61,34375   | 80,04426  | 98,29802   | 93,325685  |
| ID1157          | SET                    | 91,001075                                 | 101,152555 | 87,10979   | 105,5324   | 98,534085  | 95,035435  | 56,75687   | 44,50149   | 57,613325  | 64,11875  | 60,40336   | 57,33314   |
| ID90190         | SET                    | 53,800325                                 | 45,24246   | 73,62625   | 73,243945  | 87,51933   | 99,40002   | 24,228875  | 7,055915   | 21,826935  | 44,49076  | 75,14704   | 70,72299   |
| ID279386        | SET                    | 97,517155                                 | 101,00069  | 106,192755 | 131,68405  | 122,038935 | 125,47781  | 73,731165  | 64,23634   | 70,48868   | 92,7133   | 97,494935  | 93,791225  |
| ID1052          | SET,ADRM1,MYL3         | 156,330105                                | 179,4491   | 157,64854  | 113,75063  | 117,254505 | 109,341605 | 66,74961   | 88,63489   | 65,794795  | 61,88892  | 75,439265  | 77,73833   |
| ID2906459       | SET,HDGF               | 95,760165                                 | 115,494845 | 126,740535 | 113,681495 | 99,3109    | 96,761725  | 64,555545  | 71,740045  | 70,157055  | 46,91325  | 72,055535  | 68,766385  |
| ID306795        | SET,HDGF               | 109,508145                                | 142,49929  | 124,75851  | 145,30197  | 177,111745 | 102,235415 | 34,32333   | 40,25473   | 40,01487   | 26,02775  | 82,343155  | 65,60388   |
| ID92002         | SET,SPSY,HSP7C,RSSA    | 170,98863                                 | 275,94127  | 207,232355 | 140,38776  | 176,28179  | 120,1309   | 44,10635   | 120,816445 | 68,04464   | 92,8231   | 118,58032  | 89,504575  |
| ID3760549       | SF3A3                  | 108,074355                                | 115,4459   | 116,005045 | 110,57355  | 112,62266  | 110,03992  | 107,931985 | 96,23625   | 75,858115  | 75,68843  | 73,252985  | 71,873795  |

Table S-1

| ID <sup>1</sup> | Protein <sup>2</sup>         | Median of normalized volumes <sup>3</sup> |            |            |            |            |            |            |            |            |           |            |            |
|-----------------|------------------------------|-------------------------------------------|------------|------------|------------|------------|------------|------------|------------|------------|-----------|------------|------------|
|                 |                              | co_0 min                                  | co_30 min  | co_60 min  | co_24 h    | co_48 h    | co_72 h    | PI_0 min   | PI_30 min  | PI_60 min  | PI_24 h   | PI_48 h    | PI_72 h    |
| ID9421          | SF3B2                        | 104,00866                                 | 97,49692   | 103,0334   | 84,832695  | 104,40951  | 123,290995 | 84,082745  | 99,671755  | 96,89548   | 159,39478 | 103,666445 | 93,295085  |
| ID354           | SF3B2                        | 87,997525                                 | 97,73544   | 97,64113   | 128,90794  | 118,956495 | 134,52382  | 56,77604   | 46,608455  | 45,71159   | 23,88642  | 69,292855  | 67,889055  |
| ID355           | SF3B2                        | 101,707945                                | 113,45567  | 111,854045 | 143,80814  | 131,4804   | 133,6813   | 64,67802   | 52,532145  | 53,3753    | 33,82847  | 70,377805  | 65,34395   |
| ID2995227       | SFRS1                        | 84,08593                                  | 88,116885  | 88,33843   | 104,877195 | 128,18189  | 89,963265  | 83,945593  | 75,26504   | 80,10889   | 45,95296  | 86,86657   | 57,8391    |
| ID1536          | SFRS3                        | 112,711435                                | 117,55585  | 123,09675  | 123,53659  | 143,41232  | 130,545755 | 48,31606   | 55,72197   | 66,770565  | 91,60688  | 84,943685  | 86,861395  |
| ID2287478       | SFRS3                        | 114,61784                                 | 132,61368  | 126,3033   | 152,367195 | 128,036525 | 113,41255  | 85,226125  | 90,295755  | 96,72478   | 39,360675 | 55,29947   | 53,2745    |
| ID1565          | SFRS3                        | 109,023795                                | 115,17442  | 117,84112  | 117,541405 | 136,88622  | 123,145795 | 112,986325 | 97,41383   | 86,64104   | 77,82344  | 81,612425  | 67,77637   |
| ID1572          | SFRS3                        | 97,21524                                  | 115,36315  | 95,409085  | 136,498045 | 111,085585 | 113,62893  | 117,386245 | 86,6367    | 84,49697   | 4,63867   | 52,794415  | 35,30268   |
| ID1267          | SGTA,HDGF,ANXA2              | 114,682475                                | 123,788925 | 124,954455 | 120,042045 | 113,5074   | 116,00765  | 64,88041   | 48,893335  | 61,306755  | 94,32573  | 97,87731   | 98,89685   |
| ID972           | SHLB2                        | 100,89477                                 | 111,179645 | 101,30167  | 130,193775 | 139,37981  | 143,92905  | 63,82429   | 60,26081   | 71,346035  | 61,19357  | 78,80873   | 76,77294   |
| ID408351        | SHLB2,AL9A1                  | 101,98137                                 | 117,491025 | 108,152635 | 132,61745  | 114,053295 | 144,20202  | 58,076795  | 69,43387   | 69,560325  | 82,47422  | 71,636235  | 83,29015   |
| ID950           | SHLB2,AL9A1                  | 104,74609                                 | 123,107975 | 122,07331  | 138,3217   | 107,71413  | 97,15685   | 115,028515 | 118,49549  | 107,019695 | 79,37761  | 75,479165  | 88,382805  |
| ID1628          | SKP1                         | 83,608905                                 | 96,5356    | 93,92058   | 90,72246   | 95,92987   | 101,443955 | 76,21926   | 75,524135  | 85,15592   | 85,55401  | 70,08186   | 58,547825  |
| ID1305          | SNA4,SFRS1                   | 118,47806                                 | 123,669495 | 123,36385  | 132,96543  | 139,060845 | 122,81067  | 90,74157   | 93,025295  | 102,52833  | 77,51945  | 75,452525  | 74,20181   |
| ID956           | SNX6,HNRH1                   | 105,46485                                 | 121,883465 | 109,485695 | 136,065405 | 134,031515 | 131,568315 | 62,251745  | 59,599115  | 65,42702   | 67,03359  | 81,44327   | 88,4429    |
| ID30752         | SODC                         | 77,67357                                  | 78,00102   | 75,803055  | 144,32041  | 122,77806  | 115,986995 | 32,361365  | 30,3744    | 44,382475  | 79,13615  | 65,4886    | 65,4389    |
| ID508072        | SODC                         | 103,738                                   | 116,5195   | 100,349145 | 131,24098  | 121,695765 | 127,465295 | 60,107275  | 71,384125  | 74,176945  | 60,75552  | 68,031945  | 61,57637   |
| ID1651          | SODC                         | 85,36791                                  | 94,749065  | 83,02438   | 106,836875 | 99,22706   | 131,14779  | 57,373805  | 56,38549   | 71,09711   | 79,89983  | 83,38503   | 87,31184   |
| ID1589          | SORCN                        | 104,3072                                  | 118,891085 | 106,1809   | 134,690835 | 122,20683  | 123,5455   | 115,445605 | 110,5011   | 99,56312   | 65,45002  | 74,70887   | 94,499405  |
| ID1143          | SPB6                         | 102,28458                                 | 104,655155 | 103,860535 | 111,48046  | 117,605255 | 121,853555 | 81,02455   | 78,450195  | 80,20745   | 127,69096 | 90,65249   | 96,39125   |
| ID1404          | SPEE,CATD                    | 94,48072                                  | 97,114375  | 101,794595 | 114,258525 | 123,674015 | 118,53216  | 91,68496   | 78,26781   | 108,704195 | 125,20421 | 111,31254  | 122,248855 |
| ID2666660       | SPRC                         | 113,423685                                | 129,07292  | 117,56307  | 79,600345  | 96,851305  | 148,58536  | 120,421805 | 104,8474   | 142,702305 | 108,45743 | 77,73621   | 88,633575  |
| ID278067        | SPRC                         | 130,882095                                | 151,92071  | 120,236535 | 151,087745 | 144,524975 | 172,78293  | 129,401585 | 102,74378  | 164,102845 | 157,98175 | 94,251545  | 92,151415  |
| ID1083          | SPS1                         | 119,199245                                | 139,95812  | 129,62371  | 129,392385 | 114,885485 | 133,553715 | 63,65525   | 62,352105  | 68,23344   | 78,36534  | 78,089475  | 84,37482   |
| ID1121          | SPSY,ARSA1                   | 125,13303                                 | 127,616505 | 145,54515  | 125,076035 | 123,43279  | 116,504205 | 52,85786   | 64,183175  | 69,69096   | 66,72611  | 71,07534   | 80,05603   |
| ID557           | SRC8                         | 106,359515                                | 115,362485 | 105,0986   | 114,72728  | 116,66064  | 120,86302  | 66,773305  | 51,71534   | 63,57755   | 55,73253  | 67,9425    | 73,72771   |
| ID1638          | SSRD                         | 131,19717                                 | 137,029805 | 141,74031  | 142,21968  | 137,8655   | 90,965585  | 140,26525  | 193,968495 | 246,96865  | 75,61905  | 79,71167   | 92,93683   |
| ID1660          | SSRD                         | 97,313095                                 | 103,891705 | 106,889825 | 74,90005   | 90,10301   | 82,65245   | 89,49216   | 70,08023   | 97,849885  | 130,10976 | 88,320245  | 84,920955  |
| ID853           | STABP                        | 143,38385                                 | 98,908065  | 130,66814  | 64,21926   | 56,06467   | 54,707815  | 256,95702  | 303,416995 | 270,457205 | 190,44948 | 178,39962  | 131,319335 |
| ID1553          | STAM1,PSB9                   | 119,600405                                | 137,72531  | 153,631825 | 87,96797   | 91,701445  | 91,33011   | 89,32822   | 79,0435    | 82,89761   | 78,63461  | 64,23562   | 63,38519   |
| ID1119          | STML2,ACTG                   | 112,09798                                 | 118,926445 | 123,215135 | 103,52421  | 103,2023   | 104,3759   | 159,4007   | 148,51999  | 167,86284  | 212,22111 | 120,784435 | 109,842685 |
| ID1695          | STMN1                        | 53,89669                                  | 58,86439   | 54,60472   | 83,424385  | 87,42896   | 107,19645  | 41,70146   | 34,413525  | 49,341075  | 52,74773  | 64,52604   | 61,27555   |
| ID1686          | STMN1                        | 71,832675                                 | 82,7885    | 71,1557    | 90,25493   | 84,15384   | 70,872185  | 56,30503   | 68,896445  | 72,67141   | 105,35126 | 78,5817    | 79,60799   |
| ID1689          | STMN1                        | 101,99064                                 | 114,49674  | 99,00122   | 118,578245 | 122,14678  | 145,0595   | 68,90617   | 60,104975  | 79,8009    | 57,36472  | 66,296875  | 64,233385  |
| ID1701          | STMN1,1433S                  | 106,32472                                 | 114,469185 | 113,44882  | 131,00202  | 124,005985 | 114,20368  | 90,22288   | 83,03169   | 93,41621   | 99,24415  | 91,54071   | 101,759525 |
| ID1684          | STMN1,PTN1                   | 61,867525                                 | 74,78417   | 60,056535  | 100,070285 | 91,6976    | 86,02186   | 47,03764   | 74,01922   | 73,0727    | 101,7943  | 78,53073   | 79,741715  |
| ID1161          | STRAP                        | 107,80446                                 | 113,13418  | 118,637645 | 133,75262  | 114,37592  | 104,981175 | 54,20013   | 51,287755  | 61,38095   | 71,93283  | 73,772185  | 81,2601    |
| ID1058          | SUCB1,IF34,ACTB,ACTG         | 105,69806                                 | 116,448565 | 117,773625 | 147,653575 | 135,73562  | 123,773285 | 71,587265  | 65,64931   | 85,95372   | 63,22818  | 61,710865  | 67,95177   |
| ID1214          | SUGT1                        | 108,70235                                 | 121,185    | 106,68276  | 133,848595 | 110,00017  | 103,157135 | 60,503625  | 51,51347   | 58,89194   | 96,87095  | 77,46692   | 82,826575  |
| ID144537        | SUGT1,NUBP1                  | 103,46753                                 | 113,10995  | 103,6223   | 135,89852  | 119,092775 | 108,4261   | 64,7285    | 71,125635  | 82,228205  | 73,57395  | 64,64898   | 66,68077   |
| ID974           | SYDC                         | 86,97485                                  | 93,54538   | 90,65602   | 117,609455 | 100,74391  | 84,81311   | 59,954665  | 53,59742   | 66,175445  | 79,31747  | 82,061985  | 80,66019   |
| ID934           | SYDC,HNRH1,PTN1,BLMH         | 103,665395                                | 119,153085 | 111,917245 | 117,515345 | 111,62218  | 127,40256  | 78,96744   | 70,001     | 71,208835  | 1,00922   | 70,60591   | 75,976055  |
| ID28319         | SYG,CALD1                    | 89,79939                                  | 94,18571   | 94,045285  | 135,68922  | 121,63572  | 116,382375 | 68,46554   | 78,825125  | 68,774035  | 301,48093 | 76,935275  | 99,200035  |
| ID673           | SYG,DPYL2                    | 106,008125                                | 114,54211  | 110,11315  | 124,787285 | 122,67128  | 130,5468   | 61,760235  | 66,63099   | 65,938745  | 335,18767 | 87,072685  | 102,351415 |
| ID908           | SYHC                         | 113,43782                                 | 129,127785 | 120,117745 | 135,25863  | 128,693185 | 127,595975 | 81,602875  | 92,775735  | 86,622725  | 59,12767  | 74,178405  | 83,394765  |
| ID377849        | SYHC,VATB2,PDIA3,RUVB2       | 96,59824                                  | 103,035705 | 99,97237   | 120,030715 | 122,905535 | 139,037495 | 86,75861   | 80,055765  | 88,001255  | 81,67888  | 78,472365  | 83,686745  |
| ID683           | SYK,TRFL                     | 111,005275                                | 89,99014   | 109,16068  | 87,854235  | 73,35725   | 79,719485  | 165,94605  | 191,65357  | 177,317635 | 232,14999 | 158,334905 | 131,397135 |
| ID885           | SYWC                         | 106,68288                                 | 111,54154  | 112,063995 | 113,01617  | 120,3394   | 135,474865 | 59,5189    | 64,15067   | 70,888065  | 63,56415  | 80,750835  | 94,400315  |
| ID29100         | TADBP,ACY1                   | 127,924155                                | 145,49744  | 146,11859  | 136,65021  | 144,913395 | 143,985205 | 75,777715  | 88,00546   | 85,93414   | 63,165    | 64,34347   | 75,18111   |
| ID1084          | TADBP,PPME1                  | 112,75583                                 | 120,24165  | 119,55705  | 121,93816  | 134,559595 | 138,85788  | 66,901325  | 51,72873   | 71,315205  | 57,40883  | 68,53442   | 91,265715  |
| ID3369954       | TADBP,PPME1                  | 79,97274                                  | 98,467085  | 101,58603  | 155,188115 | 1116,37975 | 224,34762  | 61,559015  | 52,20337   | 83,63606   | 50,18611  | n.d.       | 0          |
| ID1270          | TALDO                        | 46,037975                                 | 55,08936   | 48,19669   | 100,39156  | 80,507775  | 84,24322   | 54,89306   | 58,22396   | 45,86725   | 27,73946  | 81,31807   | 74,667865  |
| ID1234          | TALDO,PP1B,KPYM              | 111,22697                                 | 119,762085 | 116,246605 | 116,395715 | 110,128215 | 109,876195 | 70,29214   | 73,356045  | 75,823855  | 92,40881  | 91,467685  | 100,006925 |
| ID890           | TBA1B                        | 95,264445                                 | 99,360535  | 98,678595  | 105,62553  | 122,56673  | 137,604925 | 51,899625  | 51,769355  | 59,016295  | 63,57524  | 69,318835  | 85,212815  |
| ID402687        | TBA1B                        | 117,12177                                 | 123,91457  | 123,967595 | 135,308125 | 130,60964  | 145,656315 | 56,400345  | 37,457485  | 63,953925  | 65,40134  | 48,59121   | 61,24408   |
| ID859           | TBA1B,TBA1C,VIME,TBA3,TBA6,D | 96,85395                                  | 93,464195  | 91,9938    | 100,274785 | 101,45379  | 108,234675 | 68,38951   | 68,65779   | 73,349875  | 77,80765  | 78,322295  | 79,436965  |
| ID835           | TBA1B,TBAK,TBA3,IFIT3        | 107,545015                                | 105,278375 | 100,32752  | 106,006465 | 130,39683  | 95,09747   | 88,198875  | 85,674685  | 92,72429   | 74,9413   | 90,04079   | 82,325975  |

Table S-1

|                 |                               | Median of normalized volumes <sup>13</sup> |            |            |            |            |            |            |            |            |           |            |            |
|-----------------|-------------------------------|--------------------------------------------|------------|------------|------------|------------|------------|------------|------------|------------|-----------|------------|------------|
| ID <sup>1</sup> | Protein <sup>2</sup>          | co_0 min                                   | co_30 min  | co_60 min  | co_24 h    | co_48 h    | co_72 h    | PI_0 min   | PI_30 min  | PI_60 min  | PI_24 h   | PI_48 h    | PI_72 h    |
| ID840           | TBA1B, TBAK, TBA3, VIME       | 101,915655                                 | 99,636605  | 98,34748   | 91,792475  | 102,26246  | 96,19998   | 93,71253   | 87,60761   | 84,059275  | 78,73732  | 85,75382   | 87,342205  |
| ID904           | TBA1B, TBB5                   | 130,54446                                  | 133,56544  | 178,02536  | 120,23853  | 105,505645 | 87,763375  | 118,491135 | 156,160885 | 72,7684    | 67,92255  | 85,873845  |            |
| ID870           | TBA1B, VIME, TBB3             | 74,32024                                   | 73,20761   | 74,88041   | 91,504015  | 92,307285  | 103,37053  | 58,49804   | 64,495845  | 64,35777   | 88,02015  | 81,75455   | 79,757405  |
| ID906           | TBA1C, PTRF, TBA4A, TBB5      | 120,201275                                 | 122,359755 | 136,379455 | 137,59037  | 120,529885 | 109,092265 | 105,004345 | 126,366745 | 93,92511   | 80,71481  | 74,47862   | 82,260945  |
| ID2200          | TBA3                          | 147,31423                                  | 106,08293  | 121,26047  | 70,03221   | 61,0417    | 60,978115  | 258,5224   | 277,478745 | 260,80263  | 192,21894 | 186,29199  | 136,83329  |
| ID15904         | TBAK                          | 62,582145                                  | 69,9074    | 66,820445  | 82,112295  | 99,091245  | 104,15983  | 90,8414    | 88,87464   | 62,66323   | 76,88643  | 71,40536   | 67,4793    |
| ID876           | TBAK                          | 142,786355                                 | 141,096415 | 147,1348   | 123,776075 | 122,43476  | 122,566505 | 66,52314   | 76,97641   | 71,60967   | 74,06303  | 69,695805  | 70,13703   |
| ID3111980       | TBB2C                         | 132,392915                                 | 135,627895 | 126,61738  | 118,231365 | 115,31196  | 122,50075  | 61,26742   | 73,39976   | 69,396095  | 80,21768  | 76,085185  | 73,740835  |
| ID875           | TBB2C, TBB3, TBB5             | 102,52119                                  | 97,70481   | 92,55008   | 119,504385 | 121,8643   | 106,14226  | 54,01545   | 63,53622   | 63,397155  | 64,9898   | 80,0242    | 75,78279   |
| ID3104          | TBB2C, TBB6, TBB2A, SMCE1     | 81,803805                                  | 83,27809   | 83,98931   | 114,81774  | 107,628795 | 116,17155  | 48,358695  | 50,15844   | 56,188785  | 74,46176  | 86,79016   | 86,94701   |
| ID2998          | TBB2C, TFG                    | 58,41883                                   | 60,50244   | 61,144355  | 94,745255  | 84,48609   | 98,264035  | 59,442745  | 62,86605   | 62,896325  | 92,57058  | 80,29891   | 82,10996   |
| ID3150          | TBB3, TBB2C                   | 91,90149                                   | 99,78985   | 93,058955  | 111,59926  | 98,79397   | 98,428675  | 50,116175  | 58,22764   | 57,2915    | 93,83082  | 81,773945  | 73,632975  |
| ID93790         | TBB5, TBB2C, ENOG             | 83,719345                                  | 95,068055  | 81,496645  | 143,02259  | 121,84606  | 105,802255 | 77,17916   | 72,479765  | 75,09299   | 62,56366  | 52,08801   | 54,03951   |
| ID1780          | TBCA                          | 87,44634                                   | 100,59323  | 88,42513   | 107,698435 | 104,74288  | 105,34499  | 54,70108   | 54,586345  | 67,235835  | 89,22143  | 88,045435  | 89,28725   |
| ID973           | TBG1, MPPB                    | 90,948685                                  | 97,33007   | 92,862345  | 128,465675 | 112,52212  | 118,789665 | 65,001165  | 60,659335  | 61,3763    | 64,22634  | 81,72607   | 81,48226   |
| ID793           | TCPA                          | 118,4442                                   | 132,46762  | 121,64892  | 150,74127  | 135,705415 | 121,284705 | 71,17259   | 68,904845  | 73,3631    | 89,54403  | 66,906415  | 103,367765 |
| ID29990         | TCPA                          | 128,252835                                 | 121,863135 | 138,87866  | 121,118085 | 95,69441   | 105,18873  | 188,365255 | 257,51989  | 220,91121  | 120,30771 | 120,382635 | 111,18875  |
| ID17458         | TCPA, CPNE2                   | 121,3886                                   | 133,59307  | 128,202825 | 135,124925 | 129,34916  | 114,330135 | 81,75712   | 98,18757   | 98,460005  | 111,20875 | 101,850515 | 77,71129   |
| ID888           | TCPB, RUVB1                   | 116,071455                                 | 130,14983  | 120,667715 | 129,81013  | 120,38592  | 115,7965   | 81,20948   | 78,62589   | 81,434275  | 46,59495  | 88,87793   | 93,824995  |
| ID804           | TCPE                          | 70,23104                                   | 78,113725  | 75,16691   | 104,659645 | 101,158505 | 107,304815 | 66,396135  | 52,153985  | 56,06378   | 85,72547  | 85,17935   | 86,93048   |
| ID405373        | TCPE, FKBP4, CPNE1            | 106,95971                                  | 121,302995 | 115,6175   | 134,193115 | 122,4875   | 140,74468  | 88,17369   | 80,571535  | 81,91775   | 100,3034  | 107,60261  | 114,583735 |
| ID847           | TCPE, HNRPK                   | 79,91364                                   | 82,684535  | 82,59949   | 109,725285 | 102,800305 | 121,50367  | 67,023255  | 53,42508   | 60,103795  | 75,18182  | 75,22213   | 78,638965  |
| ID760           | TCPG                          | 106,6701                                   | 123,62841  | 111,37225  | 134,811175 | 119,877655 | 119,970525 | 78,763685  | 78,360635  | 77,307315  | 59,51413  | 85,22318   | 89,39036   |
| ID771           | TCPG                          | 86,924765                                  | 95,184065  | 90,871005  | 113,38217  | 107,666225 | 113,368925 | 80,514475  | 84,00995   | 82,67404   | 8,4973    | 88,07452   | 95,044245  |
| ID796           | TCPO, HNRPK                   | 119,93508                                  | 131,854005 | 126,953875 | 139,888865 | 137,684675 | 139,13236  | 121,410645 | 84,280435  | 77,43332   | 87,93408  | 100,742415 | 96,371695  |
| ID2000013       | TCTP                          | 110,466475                                 | 124,97983  | 126,256405 | 148,32412  | 83,999855  | 56,560215  | 78,29314   | 91,23241   | 90,67366   | 150,39073 | 98,63491   | 76,88326   |
| ID1576          | TCTP                          | 105,97151                                  | 118,85147  | 109,524155 | 127,73556  | 117,57     | 110,3025   | 97,4242    | 87,38393   | 91,426205  | 82,03224  | 82,040275  | 75,942345  |
| ID1501          | TCTP, CBX1                    | 103,716475                                 | 117,796085 | 106,958135 | 116,871425 | 100,53095  | 89,14123   | 82,495145  | 75,33266   | 86,211285  | 100,51043 | 81,344005  | 81,840165  |
| ID2310          | TEBP                          | 94,731895                                  | 101,416955 | 108,854295 | 120,00349  | 106,302345 | 139,28641  | 58,273185  | 58,49522   | 61,71551   | 51,86479  | 71,370985  | 66,065145  |
| ID1610          | TEBP                          | 89,17078                                   | 96,16524   | 103,02015  | 118,67615  | 96,574585  | 161,00998  | 55,218705  | 58,12572   | 62,25732   | 56,6445   | 60,94245   | 63,2422    |
| ID542           | TERA                          | 79,298635                                  | 86,71852   | 80,04221   | 103,71703  | 105,17944  | 110,9048   | 61,57492   | 52,12901   | 58,17247   | 65,62233  | 80,352335  | 81,879295  |
| ID540           | TERA                          | 105,525485                                 | 105,642535 | 108,679135 | 139,77478  | 136,626345 | 110,745185 | 77,224405  | 67,864795  | 71,150385  | 68,02345  | 83,722045  | 86,403375  |
| ID9875          | TERA                          | 119,54127                                  | 132,83385  | 118,77012  | 145,72327  | 142,24054  | 135,496795 | 76,30357   | 63,97739   | 68,104795  | 65,99823  | 80,272275  | 88,37103   |
| ID1821          | THIO, RFA3, LEG1, COX5A       | 105,50094                                  | 118,3811   | 110,32622  | 102,50779  | 142,294415 | 107,86662  | 70,529195  | 81,415325  | 86,134135  | 175,51911 | 136,73071  | 213,645755 |
| ID1115          | THOC3                         | 118,00706                                  | 139,786045 | 123,76074  | 118,417415 | 106,31198  | 134,065365 | 94,50324   | 103,14751  | 103,59713  | 74,46585  | 86,110755  | 88,40038   |
| ID607           | THOP1                         | 106,390985                                 | 113,64369  | 119,15148  | 114,015905 | 128,859975 | 137,4544   | 114,12254  | 86,705615  | 114,26958  | 80,13941  | 93,260585  | 82,67909   |
| ID488           | TIF1B                         | 145,87498                                  | 161,830615 | 147,937675 | 161,718875 | 185,06094  | 164,942965 | 104,41485  | 60,51613   | 60,474535  | 54,08774  | 97,496385  | 87,764175  |
| ID1419          | TIF1B, 1433G                  | 107,39388                                  | 112,527045 | 121,67679  | 108,170435 | 113,015455 | 113,84424  | 63,69867   | 64,513815  | 72,52019   | 81,6556   | 77,333185  | 79,784275  |
| ID479           | TIF1B, HNRPU                  | 110,74223                                  | 114,960075 | 113,378275 | 177,022195 | 173,22841  | 144,30218  | 59,920425  | 51,134945  | 55,654905  | 33,80963  | 79,909245  | 86,493745  |
| ID774           | TM1L2                         | 127,78688                                  | 84,645695  | 131,60445  | 56,247235  | 60,237875  | 57,60581   | 233,48109  | 277,38272  | 228,942725 | 215,68806 | 194,10124  | 138,725575 |
| ID3085623       | TMOD3                         | 97,930885                                  | 102,895475 | 100,729165 | 81,958625  | 82,744185  | 65,35633   | 57,53561   | 54,92819   | 64,880675  | 78,64657  | 77,819035  | 46,59135   |
| ID1131          | TMOD3                         | 77,711195                                  | 84,45241   | 74,23272   | 118,08982  | 115,418895 | 114,30412  | 70,56995   | 64,001985  | 67,60251   | 91,60188  | 79,68323   | 80,475485  |
| ID1315          | TPM1                          | 101,365075                                 | 111,758785 | 100,38814  | 113,95565  | 125,371045 | 132,556205 | 104,76019  | 92,61746   | 97,46175   | 75,01152  | 58,863005  | 68,803065  |
| ID55610         | TPM1, TPM2                    | 82,986375                                  | 93,63326   | 84,37219   | 119,07904  | 136,40331  | 137,12414  | 87,25674   | 68,834825  | 77,66554   | 58,43241  | 50,426705  | 57,60713   |
| ID1210          | TPM2                          | 81,584245                                  | 92,485725  | 82,264965  | 105,05118  | 94,63098   | 86,041155  | 80,1584    | 64,57861   | 71,17692   | 69,48085  | 63,270005  | 72,592125  |
| ID56308         | TPM2                          | 85,1463                                    | 96,30605   | 87,923295  | 103,712925 | 101,32077  | 111,28414  | 61,92655   | 57,77735   | 61,567945  | 63,58844  | 66,82666   | 84,42606   |
| ID87491         | TPM2                          | 90,981105                                  | 81,03269   | 97,02572   | 125,076125 | 117,85711  | 92,60504   | 52,322035  | 58,118485  | 66,34519   | 114,337   | 79,622535  | 97,08293   |
| ID1372          | TPM3, TPM4, TPM1, TPM2, TPM3L | 118,71201                                  | 126,30024  | 124,77774  | 120,1063   | 126,485885 | 119,447845 | 75,781595  | 70,77843   | 82,186375  | 69,09847  | 84,920815  | 89,197335  |
| ID1374          | TPM3, TPM4, TPM2, TPM3L       | 97,676605                                  | 106,100005 | 96,6471    | 113,118945 | 114,091785 | 117,97073  | 84,14596   | 75,757775  | 79,667005  | 76,30327  | 80,216465  | 85,51914   |
| ID1369          | TPM4                          | 90,9618                                    | 98,59639   | 93,724715  | 114,72304  | 112,859855 | 74,107035  | 65,420815  | 70,5944    | 74,19477   | 75,68051  | 80,016505  |            |
| ID13616         | TPP1, HNRPF                   | 87,665815                                  | 93,232335  | 93,846315  | 109,49387  | 97,64739   | 98,545675  | 93,662655  | 82,72806   | 78,843675  | 83,72728  | 69,557625  | 66,07307   |
| ID1153          | TRA2B, CSN4                   | 105,808135                                 | 119,748975 | 115,14961  | 127,34027  | 122,18953  | 120,9683   | 50,903235  | 48,01539   | 60,918375  | 84,72603  | 85,7693    | 88,50387   |
| ID688           | TRFL                          | 119,949005                                 | 87,835945  | 113,68177  | 66,88199   | 64,408675  | 65,233095  | 199,671825 | 222,852575 | 219,58604  | 116,59035 | 163,649825 | 130,63994  |
| ID837           | TRXR1                         | 113,523995                                 | 131,82959  | 127,635555 | 124,972565 | 109,16343  | 101,74641  | 95,429955  | 120,54153  | 108,702895 | 15,88342  | 108,252875 | 110,481085 |
| ID849           | TRXR1                         | 111,94964                                  | 114,143085 | 126,76321  | 121,061955 | 110,843655 | 106,1372   | 81,28055   | 78,73571   | 92,481545  | 27,71662  | 92,887255  | 99,84392   |
| ID751           | TRXR1                         | 134,174835                                 | 85,3874    | 134,380105 | 58,83923   | 52,720775  | 49,18618   | 255,004225 | 310,419775 | 255,31109  | 197,29714 | 185,58202  | 133,53722  |
| ID1335          | TSNAX                         | 128,70297                                  | 123,710595 | 136,11567  | 91,542875  | 96,3565    | 98,75087   | 163,537965 | 176,831045 | 181,32941  | 81,89616  | 146,31031  | 115,32371  |

Table S-1

| ID <sup>1</sup> | Protein <sup>2</sup>    | Median of normalized volumes <sup>3</sup> |            |            |            |            |            |            |            |            |           |            |            |
|-----------------|-------------------------|-------------------------------------------|------------|------------|------------|------------|------------|------------|------------|------------|-----------|------------|------------|
|                 |                         | co_0 min                                  | co_30 min  | co_60 min  | co_24 h    | co_48 h    | co_72 h    | PI_0 min   | PI_30 min  | PI_60 min  | PI_24 h   | PI_48 h    | PI_72 h    |
| ID19644         | TTL12                   | 109,4187                                  | 100,261515 | 106,1795   | 124,425725 | 98,00787   | 99,95302   | 111,263125 | 119,323215 | 113,178255 | 137,26886 | 129,3671   | 123,68009  |
| ID1693          | TXD12, STMN1            | 55,782925                                 | 67,01284   | 56,565615  | 77,627035  | 69,6899    | 63,36991   | 53,049035  | 57,30583   | 65,00961   | 74,43592  | 60,493915  | 61,272415  |
| ID1033          | TXND4, ACTG, PRS6B      | 100,700625                                | 114,42747  | 108,644575 | 118,217035 | 129,13127  | 124,850715 | 101,098185 | 106,368385 | 110,42778  | 131,26682 | 96,075455  | 97,018615  |
| ID203683        | TXND5, ACL6A            | 152,928655                                | 146,76655  | 170,039595 | 101,19542  | 102,25094  | 87,316245  | 180,268895 | 195,056605 | 207,976745 | 272,79647 | 139,96844  | 146,655335 |
| ID992           | TXND5, ACL6A            | 235,52853                                 | 238,642075 | 250,33084  | 189,80415  | 178,50368  | 129,81616  | 257,009605 | 248,08958  | 257,26296  | 108,72986 | 92,319725  | 88,216715  |
| ID977           | TXND5, HNRPF, TBAK      | 106,534615                                | 121,835695 | 112,283065 | 110,715365 | 107,032715 | 113,78369  | 143,355735 | 139,308725 | 146,516375 | 128,02817 | 76,894945  | 74,90412   |
| ID13083         | TXND5, SH3G1            | 115,78492                                 | 119,84733  | 117,36392  | 120,71595  | 129,171925 | 128,35887  | 43,693205  | 41,71864   | 67,43993   | 68,61202  | 72,92071   | 78,12844   |
| ID1269          | TXNL1, ANXA2            | 114,642035                                | 121,322165 | 110,08571  | 141,671065 | 119,460035 | 102,82043  | 78,50654   | 70,66707   | 84,87337   | 106,64523 | 93,85618   | 91,698315  |
| ID16669         | TXNL5                   | 99,913465                                 | 113,716805 | 101,22761  | 114,723395 | 184,9951   | 132,481935 | 53,94763   | 60,422415  | 71,462315  | 78,60654  | 140,77791  | 282,275225 |
| ID36428         | U2AF2                   | 102,359515                                | 105,466185 | 106,76724  | 124,87492  | 113,333885 | 156,44211  | 113,0564   | 124,35203  | 111,653735 | 0         | 119,226365 | 101,7609   |
| ID811           | U2AF2, DPYL2            | 110,481865                                | 108,47282  | 112,21673  | 141,717165 | 121,38973  | 123,67223  | 112,28858  | 136,3237   | 121,84194  | 0         | 112,959085 | 118,34513  |
| ID1358          | UBA1, 3HIDH             | 123,774175                                | 135,213025 | 140,202705 | 134,59448  | 151,634485 | 145,5793   | 87,970475  | 93,066035  | 104,8903   | 70,95778  | 70,576515  | 69,423255  |
| ID469           | UBA1, TIF1B             | 115,93437                                 | 118,778855 | 117,12309  | 139,91161  | 152,774025 | 141,644105 | 64,15116   | 46,57239   | 52,2904    | 59,21721  | 81,77593   | 87,81645   |
| ID478           | UBA1, TIF1B             | 119,841685                                | 127,442445 | 122,45601  | 136,708115 | 153,33638  | 153,16965  | 72,93023   | 58,492275  | 62,187285  | 54,95988  | 81,829295  | 85,724265  |
| ID3542          | UBA5                    | 70,840585                                 | 83,18012   | 85,96799   | 129,9399   | 123,099415 | 108,543895 | 51,65008   | 45,637315  | 55,643155  | 43,18664  | 61,822665  | 59,19131   |
| ID1116          | UBCP1                   | 101,82225                                 | 110,24278  | 111,613705 | 122,031605 | 120,900345 | 120,44348  | 59,28245   | 57,415305  | 68,949655  | 39,26686  | 95,06546   | 91,129395  |
| ID554833        | UBE1                    | 118,444595                                | 120,59193  | 121,933225 | 156,662625 | 152,943605 | 133,11169  | 61,55029   | 46,319475  | 52,807175  | 50,75163  | 73,945325  | 74,42804   |
| ID466           | UBE1, MVP, UBA1         | 116,71923                                 | 122,64151  | 116,33569  | 150,466055 | 142,208825 | 130,339855 | 54,85715   | 50,36247   | 55,494095  | 56,43027  | 78,34836   | 83,431535  |
| ID1526          | UBE2K, RPE, CBX5, GSTP1 | 114,563135                                | 117,310005 | 118,789995 | 121,825895 | 116,019855 | 118,62817  | 76,758485  | 98,695045  | 97,89192   | 117,44636 | 96,657755  | 92,92888   |
| ID818           | UBP14                   | 111,675885                                | 115,23956  | 115,723225 | 119,237815 | 114,04965  | 112,10458  | 59,26781   | 56,03193   | 65,109055  | 81,5256   | 78,88784   | 88,946395  |
| ID821           | UBP14, IMA2             | 96,145095                                 | 99,033415  | 101,150525 | 112,095685 | 109,7069   | 109,522825 | 71,658985  | 76,68781   | 80,59193   | 96,10563  | 98,20461   | 99,23621   |
| ID545           | UBP5                    | 92,24255                                  | 96,318495  | 92,186215  | 115,05011  | 116,555285 | 110,035425 | 40,69518   | 38,485135  | 46,86629   | 66,16786  | 75,129335  | 79,296595  |
| ID550           | UBP5, P3H1              | 128,3653                                  | 139,0131   | 131,3987   | 144,45944  | 137,89354  | 132,22175  | 55,46841   | 53,79609   | 62,3893    | 71,2891   | 80,059605  | 82,15437   |
| ID764           | UBQL1                   | 124,391515                                | 78,49392   | 120,011975 | 53,230645  | 49,52252   | 50,64605   | 225,99419  | 286,0227   | 244,42998  | 225,84388 | 211,407045 | 158,83212  |
| ID1491          | UCHL1                   | 103,449245                                | 120,131415 | 103,915355 | 122,710555 | 110,02661  | 110,18761  | 80,425555  | 89,98743   | 89,30941   | 81,32621  | 84,03044   | 97,30124   |
| ID809           | ULA1                    | 109,55114                                 | 106,97498  | 117,195135 | 124,64378  | 127,78734  | 124,594475 | 59,93977   | 49,04721   | 52,36223   | 67,58078  | 78,54373   | 85,67404   |
| ID1013          | UQCR1                   | 108,34266                                 | 116,835935 | 117,606495 | 121,206755 | 115,80193  | 106,887515 | 129,941135 | 123,388465 | 137,95888  | 83,37747  | 84,17406   | 94,21168   |
| ID201269        | UQCR1, HNRPK, RUVB2     | 135,685375                                | 122,781355 | 158,92029  | 105,26503  | 109,38045  | 100,992205 | 21,41851   | 20,189925  | 26,204505  | 49,84153  | 44,396575  | 48,96495   |
| ID1031          | VAT1                    | 115,13403                                 | 119,1352   | 129,73351  | 126,19932  | 114,644225 | 108,125795 | 91,310995  | 74,00353   | 81,326505  | 3,23786   | 75,04638   | 80,42105   |
| ID975           | VIME                    | 83,15018                                  | 140,06044  | 96,881215  | 118,83479  | 112,790465 | 70,52669   | 133,946755 | 156,328995 | 130,350435 | 125,28933 | 112,55645  | 94,776095  |
| ID1044          | VIME                    | 111,197705                                | 176,29779  | 114,191915 | 106,31919  | 97,51987   | 61,438865  | 224,702165 | 254,699995 | 265,488905 | 126,86265 | 132,036845 | 91,47436   |
| ID2117397       | VINC                    | 92,75261                                  | 99,547945  | 94,565845  | 165,01641  | 103,615765 | 139,061865 | 50,545035  | 51,514545  | 59,007285  | 24,47317  | 3,089735   | 10,739025  |
| ID432           | VINC                    | 85,425725                                 | 93,377645  | 87,658055  | 117,00962  | 119,91139  | 119,645315 | 61,571035  | 55,069445  | 59,608     | 55,97098  | 76,59903   | 79,645155  |
| ID433           | VINC                    | 112,184425                                | 125,17678  | 118,099415 | 131,706135 | 141,29929  | 124,652305 | 72,74277   | 66,61792   | 68,42316   | 0,27231   | 77,305985  | 85,00315   |
| ID682           | VINC                    | 75,880125                                 | 80,48632   | 74,85928   | 104,391945 | 103,09061  | 111,25333  | 53,89884   | 56,996675  | 58,83679   | 88,87081  | 89,123585  | 99,9335    |
| ID431           | VINC                    | 103,46287                                 | 109,34878  | 107,09362  | 123,61521  | 128,01261  | 127,149945 | 82,67701   | 63,614915  | 64,563735  | 58,25315  | 70,519515  | 71,259975  |
| ID1325          | WDR61, ANXA5            | 114,6221                                  | 126,03079  | 119,291135 | 117,136485 | 110,72544  | 111,48382  | 108,547035 | 111,272315 | 104,76369  | 86,26614  | 71,854155  | 66,92673   |
| ID581           |                         | 6,232935                                  | 4,434315   | 16,111135  | 10,725475  | 3,39514    | 80,43324   | 19,214065  | 32,247915  | 55,385135  | 39,05009  | 13,522925  | 17,01142   |
| ID1730          |                         | 86,13627                                  | 94,20698   | 83,206125  | 102,87501  | 118,39894  | 151,434285 | 67,747905  | 62,6198    | 78,242945  | 76,12357  | 88,31966   | 91,83385   |
| ID2753          |                         | 106,80557                                 | 113,23479  | 122,26811  | 50,84645   | 53,7365    | 57,57306   | 121,246665 | 118,84761  | 98,792395  | 35,06248  | 49,10178   | 62,00709   |
| ID1431          |                         | 99,5535                                   | 113,253725 | 107,259575 | 113,56929  | 121,314195 | 128,35081  | 85,691455  | 109,26613  | 103,0998   | 97,3635   | 89,966155  | 95,694225  |
| ID401           |                         | 100,66903                                 | 115,47809  | 108,009455 | 142,418425 | 145,948555 | 143,893815 | 65,80364   | 53,513195  | 47,626205  | 0         | 69,26853   | 71,74029   |
| ID1960958       |                         | 58,051785                                 | 64,4183    | 62,10662   | 96,162265  | 91,953705  | 85,491955  | 35,72785   | 39,197205  | 51,217685  | 155,91061 | 85,24778   | 59,87007   |
| ID802           |                         | 123,13977                                 | 96,14617   | 103,43489  | 61,341435  | 64,309115  | 79,8477    | 202,31447  | 216,40619  | 214,05071  | 178,22072 | 138,192275 | 109,659615 |
| ID27793         |                         | 69,263905                                 | 70,2387    | 65,844525  | 125,77468  | 151,66914  | 120,71254  | 58,231095  | 76,935725  | 58,48223   | 53,10989  | 93,1551    | 100,441225 |
| ID16921         |                         | 88,03633                                  | 95,456145  | 96,73203   | 103,383615 | 86,55153   | 77,762065  | 77,37105   | 67,923775  | 72,530875  | 134,95141 | 77,456475  | 66,51837   |
| ID707           |                         | 138,72393                                 | 167,22494  | 152,663115 | 197,69686  | 156,072125 | 93,94491   | 137,598085 | 160,34473  | 153,151705 | 136,72186 | 112,229335 | 112,808075 |
| ID112515        |                         | 135,593845                                | 154,044825 | 139,802755 | 190,64652  | 160,12257  | 125,87627  | 140,86908  | 149,493055 | 122,896485 | 74,27103  | 73,41889   | 66,72025   |
| ID178566        |                         | 772,7063                                  | 982,716515 | 562,04185  | 303,22999  | 259,182505 | 146,78453  | 66,439185  | 82,12926   | 91,71515   | 60,15287  | 124,06196  | 146,99415  |
| ID1265          |                         | 87,06697                                  | 100,18235  | 88,600205  | 105,782025 | 87,670195  | 99,143215  | 99,75974   | 76,573725  | 80,66728   | 72,20896  | 88,10755   | 93,49309   |
| ID102094        |                         | 108,528315                                | 71,63596   | 107,318585 | 48,99068   | 53,91045   | 51,81122   | 154,35961  | 204,904705 | 165,75106  | 213,1786  | 179,32464  | 140,70063  |
| ID3231778       |                         | 97,13968                                  | 102,89376  | 102,29793  | 126,730005 | 108,81318  | 119,62574  | 58,178235  | 47,194395  | 54,87458   | 68,38321  | 72,561575  | 84,49456   |
| ID3765751       |                         | 461,174385                                | 420,234155 | 472,21275  | 387,600745 | 356,425355 | 382,6994   | 524,99671  | 555,628175 | 413,39074  | 318,43144 | 230,481315 | 291,95881  |
| ID62715         |                         | 82,154425                                 | 91,746385  | 79,38405   | 89,62912   | 90,72715   | 105,48491  | 89,265025  | 86,85085   | 85,03472   | 57,40375  | 69,55414   | 74,605865  |
| ID108562        |                         | 173,12704                                 | 139,262065 | 191,87752  | 99,43306   | 120,203275 | 68,394845  | 265,681345 | 312,92367  | 291,842    | 181,25774 | 204,582975 | 153,185785 |
| ID1816422       |                         | 230,32637                                 | 162,968585 | 117,47139  | 159,697895 | 118,70819  | 125,8418   | 103,346465 | 184,07925  | 192,412795 | 309,92182 | 24,008015  | 29,29396   |
| ID181505        |                         | 128,86777                                 | 111,06767  | 136,571065 | 113,846395 | 128,69617  | 102,1403   | 185,55051  | 168,10143  | 170,88952  | 156,86225 | 140,769085 | 117,59678  |

Table S-1

| ID <sup>1</sup> | Protein <sup>2</sup> | Median of normalized volumes <sup>3</sup> |            |            |            |            |            |            |            |            |           |            |            |
|-----------------|----------------------|-------------------------------------------|------------|------------|------------|------------|------------|------------|------------|------------|-----------|------------|------------|
|                 |                      | co_0 min                                  | co_30 min  | co_60 min  | co_24 h    | co_48 h    | co_72 h    | PI_0 min   | PI_30 min  | PI_60 min  | PI_24 h   | PI_48 h    | PI_72 h    |
| ID1841741       |                      | 161,13132                                 | 97,30852   | 168,172385 | 83,302995  | 70,67723   | 29,20386   | 247,270375 | 238,745735 | 265,786495 | 103,11101 | 190,73368  | 159,24913  |
| ID1570          |                      | 321,772915                                | 162,11853  | 200,714745 | 177,20264  | 116,36219  | 92,734045  | 346,738935 | 223,230485 | 254,24002  | 38,71363  | 212,16664  | 101,770695 |
| ID1096          |                      | 132,607325                                | 116,965855 | 161,920135 | 93,82334   | 75,22922   | 88,90082   | 126,603175 | 134,24826  | 139,171015 | 73,45716  | 57,99393   | 49,54109   |
| ID356           |                      | 107,100065                                | 117,515915 | 105,62896  | 129,071715 | 135,46643  | 140,40222  | 75,30208   | 66,54205   | 67,37492   | 52,48343  | 66,84895   | 76,414845  |
| ID1009          |                      | 77,09164                                  | 81,765005  | 84,11109   | 118,97128  | 112,32407  | 117,257255 | 68,729085  | 57,659385  | 70,776455  | 88,18245  | 79,343135  | 72,49686   |
| ID315           |                      | 102,975615                                | 102,91963  | 94,90443   | 183,883225 | 170,890685 | 287,866025 | 42,154565  | 48,37063   | 11,67087   | 55,08009  | 64,74959   | 15,558195  |
| ID281947        |                      | 206,34063                                 | 261,84463  | 167,201505 | 131,895165 | 113,558145 | 124,46121  | 201,31874  | 292,14533  | 392,00778  | 162,82585 | 132,306385 | 112,632625 |
| ID349           |                      | 81,501075                                 | 89,914935  | 85,983305  | 113,245185 | 108,99652  | 137,10855  | 75,687125  | 55,708795  | 57,273075  | 34,34323  | 62,013595  | 61,336335  |
| ID3130260       |                      | 110,209225                                | 132,91903  | 108,810875 | 170,776775 | 164,767645 | 144,658345 | 83,937905  | 74,248255  | 73,89623   | 51,37906  | 70,036975  | 80,21871   |
| ID1514          |                      | 115,85807                                 | 120,00256  | 128,28343  | 72,10095   | 96,83936   | 98,526485  | 106,432325 | 123,975595 | 126,56752  | 34,9522   | 127,25456  | 97,96796   |
| ID546917        |                      | 104,014925                                | 94,537315  | 105,334315 | 99,951165  | 106,972875 | 143,83009  | 100,87437  | 114,81104  | 95,79928   | 157,68661 | 113,53191  | 97,055365  |
| ID1666          |                      | 53,189925                                 | 54,62344   | 51,047455  | 89,37903   | 92,508065  | 108,87227  | 48,56132   | 45,18331   | 55,21435   | 74,58108  | 77,78287   | 77,002795  |
| ID1062          |                      | 125,52818                                 | 121,66159  | 164,7529   | 128,43798  | 120,401805 | 143,791725 | 56,966405  | 104,315115 | 34,5507    | 45,69837  | 68,838985  | 66,246545  |
| ID1045          |                      | 73,92558                                  | 86,59794   | 73,658525  | 120,380835 | 87,05214   | 347,083875 | 19,36439   | 31,56905   | 32,417355  | 107,05958 | 87,50378   | 71,867705  |
| ID426           |                      | 92,84214                                  | 90,84209   | 79,14705   | 118,39335  | 102,46039  | 127,92083  | 93,366705  | 78,802435  | 83,96011   | 73,00625  | 106,789255 | 101,0483   |
| ID516           |                      | 119,269185                                | 142,68415  | 105,3186   | 144,52316  | 128,99709  | 185,84614  | 91,79652   | 115,360895 | 92,834655  | 110,73658 | 78,910785  | 81,11365   |
| ID1094          |                      | 14,554775                                 | 13,30329   | 55,945315  | 132,24359  | 119,22258  | 208,034795 | 21,58023   | 24,163605  | 22,11484   | 140,85488 | 68,882795  | 103,44578  |
| ID2068580       |                      | 92,05072                                  | 99,94649   | 92,116705  | 133,44656  | 108,71277  | 125,251985 | 101,57966  | 92,75868   | 90,51274   | 182,36299 | 81,830255  | 63,348705  |
| ID1720          |                      | 198,20317                                 | 244,87285  | 263,080745 | 302,32105  | 524,89974  | 2856,40728 | 84,588625  | 765,49122  | 293,378365 | 49,17638  | 16,63086   | 54,74494   |
| ID528           |                      | 116,3627                                  | 136,38513  | 117,62669  | 191,640605 | 187,643445 | 149,88271  | 73,4971    | 62,012805  | 59,16886   | 64,8167   | 72,06423   | 75,884635  |
| ID2924537       |                      | 83,97005                                  | 82,17913   | 105,09132  | 107,994765 | 91,281165  | 63,627115  | 45,29174   | 35,009075  | 44,545325  | 87,41262  | 75,41953   | 91,482785  |
| ID1736          |                      | 96,11475                                  | 114,280235 | 107,779195 | 134,287375 | 130,7525   | 128,149265 | 79,51133   | 71,803365  | 80,39008   | 99,97064  | 123,194675 | 136,81095  |
| ID742           |                      | 168,854675                                | 118,915685 | 171,66444  | 101,35831  | 154,828125 | 84,938925  | 276,91089  | 462,274535 | 352,80751  | 180,75551 | 203,142165 | 171,977215 |
| ID1652          |                      | 82,91034                                  | 89,250685  | 88,279165  | 146,53124  | 122,032365 | 110,09038  | 70,09897   | 66,08466   | 74,778845  | 16,27733  | 101,006225 | 110,426305 |
| ID86593         |                      | 60,179555                                 | 69,959585  | 67,27187   | 100,946295 | 84,41753   | 101,80594  | 71,621085  | 72,6054    | 76,616425  | 118,25527 | 91,945355  | 86,85079   |
| ID3432480       |                      | 119,68745                                 | 112,477675 | 120,68502  | 96,959205  | 84,79824   | 69,321475  | 115,738205 | 149,642    | 123,58664  | 235,47502 | 177,798765 | 130,21372  |
| ID39482         |                      | 144,043165                                | 106,37228  | 138,018315 | 69,113745  | 59,525705  | 89,1117    | 208,47365  | 186,6025   | 188,794385 | 144,97297 | 139,257835 | 102,001955 |
| ID52561         |                      | 80,02076                                  | 92,36098   | 78,22415   | 86,19754   | 86,67637   | 115,9488   | 82,78556   | 78,62991   | 93,58393   | 103,92597 | 66,53423   | 71,250935  |
| ID1847793       |                      | 79,380635                                 | 89,863425  | 79,829575  | 163,35009  | 181,5684   | 149,521945 | 75,40394   | 87,63061   | 96,579775  | 82,16631  | 38,638275  | 41,54575   |
| ID24119         |                      | 67,02436                                  | 71,94608   | 71,466245  | 109,165425 | 108,107465 | 141,77515  | 68,248975  | 75,10324   | 70,09376   | 71,58679  | 74,91191   | 66,453955  |
| ID165075        |                      | 84,941535                                 | 137,590315 | 110,792795 | 139,31429  | 133,58415  | 109,94176  | 68,921025  | 62,440385  | 76,018555  | 97,22944  | 86,41604   | 105,45131  |
| ID429069        |                      | 15,026135                                 | 9,855795   | 7,28387    | 119,38847  | 89,246525  | 93,435575  | 4,120895   | 3,35227    | 1,407595   | 130,2833  | 80,90039   | 76,34109   |
| ID353686        |                      | 94,798875                                 | 104,55524  | 93,46616   | 100,229205 | 93,20995   | 121,543605 | 46,168335  | 44,733695  | 59,372825  | 37,42926  | 70,51505   | 64,021545  |
| ID2728784       |                      | 24,14911                                  | 8,906895   | 36,80894   | 45,16608   | 20,2986    | 27,65649   | 237,9151   | 169,61902  | 202,07841  | 55,51283  | 51,262755  | 34,511425  |
| ID1383          |                      | 103,1539                                  | 116,504405 | 111,66015  | 110,14962  | 94,788145  | 91,022865  | 73,829755  | 77,35495   | 89,25587   | 66,41556  | 69,234935  | 67,44099   |
| ID1758          |                      | 128,450955                                | 145,494375 | 150,435165 | 130,292445 | 119,44885  | 115,97095  | 112,15519  | 158,79685  | 109,295745 | 88,53301  | 82,02164   | 80,780845  |
| ID1359          |                      | 101,75636                                 | 104,10078  | 123,606605 | 103,03308  | 121,13189  | 122,617355 | 64,493025  | 61,51559   | 69,21603   | 85,11095  | 96,37376   | 98,61623   |
| ID2031934       |                      | 104,957165                                | 163,394145 | 113,229085 | 121,00409  | 144,07182  | 201,455875 | 29,264865  | 41,847275  | 46,08488   | 67,12947  | 50,359445  | 75,95036   |
| ID1837103       |                      | 143,64849                                 | 107,900775 | 146,153465 | 77,26538   | 78,55733   | 30,108705  | 149,80063  | 99,776415  | 114,919815 | 139,94232 | 138,70595  | 173,80362  |
| ID31086         |                      | 114,5476                                  | 130,69207  | 123,44346  | 159,488895 | 130,79704  | 109,04345  | 74,34566   | 80,148685  | 90,46542   | 0         | 78,762555  | 120,56691  |
| ID1289          |                      | 105,008845                                | 118,68994  | 123,29302  | 117,52078  | 105,30866  | 112,9206   | 131,19465  | 114,383835 | 112,19768  | 124,99535 | 85,83079   | 75,92992   |
| ID1683          |                      | 44,09344                                  | 45,927825  | 98,95058   | 145,977035 | 102,92917  | 56,519115  | 1054,43011 | 113,452595 | 842,861015 | 471,86426 | 728,76602  | 346,367055 |
| ID1782          |                      | 52,265245                                 | 54,30075   | 56,12268   | 67,941925  | 137,27136  | 126,608925 | 38,33007   | 68,793225  | 40,57865   | 108,41962 | 72,56937   | 70,078145  |
| ID3078712       |                      | 71,035405                                 | 85,311     | 68,306335  | 47,643345  | 36,30943   | 54,264085  | 140,76274  | 169,50461  | 202,46503  | 57,54324  | 43,547595  | 83,97946   |
| ID3762560       |                      | 102,01348                                 | 109,26164  | 102,18582  | 109,191635 | 98,559415  | 82,77562   | 72,72595   | 62,09902   | 63,407205  | 77,9932   | 54,85159   | 65,403     |
| ID773           |                      | 140,81262                                 | 97,46507   | 142,041085 | 68,21591   | 70,74776   | 62,241395  | 227,302215 | 271,267475 | 219,95953  | 186,80983 | 182,887775 | 130,28261  |
| ID7589          |                      | 106,845415                                | 86,52748   | 107,106485 | 68,83235   | 67,11967   | 101,437685 | 184,24436  | 202,13527  | 170,721865 | 153,91605 | 120,495755 | 101,012955 |
| ID1007          |                      | 75,969375                                 | 110,21321  | 106,84387  | 184,13656  | 116,934    | 90,758935  | 50,46594   | 57,42326   | 38,282105  | 67,91756  | 53,25103   | 68,941085  |
| ID1676          |                      | 156,379075                                | 334,992755 | 770,55968  | 58,2499    | 88,32513   | 104,358395 | 279,779975 | 189,61099  | 244,60932  | 117,44204 | 102,736775 | 95,866845  |
| ID373664        |                      | 95,4408                                   | 103,19678  | 102,438935 | 114,037805 | 113,275715 | 116,00423  | 76,669805  | 78,670465  | 80,4436    | 53,24054  | 62,275965  | 72,623085  |
| ID1484          |                      | 98,899455                                 | 112,95765  | 105,38355  | 128,846715 | 116,282765 | 116,094715 | 126,03371  | 121,290175 | 123,33277  | 123,65868 | 100,146415 | 89,16201   |
| ID2288948       |                      | 265,247605                                | 167,343935 | 332,21391  | 118,614515 | 118,19521  | 105,48726  | 582,683875 | 59,52059   | 229,716065 | 0         | 56,17431   | 1,050405   |
| ID2008587       |                      | 112,52745                                 | 135,42539  | 95,958515  | 109,22624  | 245,062905 | 170,678945 | 74,54659   | 80,77098   | 93,895825  | 68,54688  | 74,8272    | 89,075235  |
| ID750           |                      | 143,17037                                 | 89,198855  | 158,871965 | 67,240245  | 62,161255  | 38,539685  | 284,638885 | 388,179195 | 309,76899  | 188,58623 | 207,752235 | 154,44043  |
| ID715           |                      | 99,44551                                  | 87,865955  | 93,00363   | 58,971685  | 45,21444   | 58,1437    | 143,77526  | 127,284025 | 118,892605 | 175,64656 | 146,135925 | 141,375405 |
| ID124470        |                      | 76,598215                                 | 76,78254   | 71,776385  | 89,51939   | 93,52418   | 108,11386  | 60,02637   | 61,540075  | 68,869855  | 79,28843  | 82,173975  | 77,112295  |
| ID1592          |                      | 79,28551                                  | 126,22626  | 78,48521   | 132,383445 | 93,26168   | 139,955725 | 62,06761   | 82,06586   | 91,061955  | 0         | 81,981515  | 75,219985  |

Table S-1

| ID <sup>1</sup> | Protein <sup>2</sup> | Median of normalized volumes <sup>3</sup> |            |            |            |            |            |            |            |            |           |            |            |
|-----------------|----------------------|-------------------------------------------|------------|------------|------------|------------|------------|------------|------------|------------|-----------|------------|------------|
|                 |                      | co_0 min                                  | co_30 min  | co_60 min  | co_24 h    | co_48 h    | co_72 h    | PI_0 min   | PI_30 min  | PI_60 min  | PI_24 h   | PI_48 h    | PI_72 h    |
| ID380           |                      | 88,377105                                 | 87,07969   | 88,62656   | 120,49765  | 123,94714  | 122,691945 | 62,03486   | 53,01686   | 55,608565  | 58,94388  | 79,734945  | 75,28378   |
| ID3179          |                      | 128,88724                                 | 80,81253   | 121,37852  | 62,015585  | 62,28061   | 58,177865  | 218,45055  | 299,81273  | 250,221615 | 216,05134 | 200,93181  | 156,86926  |
| ID898           |                      | 110,028805                                | 106,243185 | 105,24738  | 84,342925  | 83,302645  | 86,274825  | 132,69782  | 156,284005 | 142,833955 | 150,57505 | 132,746495 | 111,17832  |
| ID538           |                      | 87,364545                                 | 98,39366   | 91,264845  | 104,249575 | 123,547235 | 136,290835 | 81,376935  | 75,358815  | 82,320045  | 36,2306   | 72,766755  | 83,94984   |
| ID254557        |                      | 103,789145                                | 90,53736   | 103,270725 | 90,03832   | 102,11021  | 134,68596  | 87,789255  | 130,112715 | 114,248805 | 128,78028 | 135,92447  | 98,80056   |
| ID1739          |                      | 84,139935                                 | 101,56645  | 81,73432   | 106,97691  | 71,85916   | 78,022805  | 106,578745 | 388,475735 | 152,131535 | 10,43426  | 48,14895   | 25,88684   |
| ID1136          |                      | 70,429495                                 | 70,84655   | 86,609605  | 84,27378   | 86,38481   | 95,145145  | 33,35413   | 37,95928   | 44,44173   | 66,56184  | 71,14884   | 77,95406   |
| ID636           |                      | 69,88651                                  | 75,45084   | 69,98012   | 111,622545 | 95,260975  | 103,573375 | 58,114705  | 58,1876    | 66,458355  | 85,23296  | 64,021275  | 73,28544   |
| ID582           |                      | 6,632855                                  | 5,50251    | 6,41177    | 20,06145   | 9,815965   | 75,764145  | 55,49522   | 71,878195  | 106,61825  | 70,52905  | 31,268095  | 37,38369   |
| ID1603          |                      | 90,396715                                 | 99,766735  | 104,829595 | 273,979095 | 386,89461  | 178,48715  | 39,721805  | 28,29353   | 51,89632   | 7,3207    | 0          | 0          |
| ID2296834       |                      | 92,71913                                  | 106,782285 | 81,94796   | 131,15208  | 121,37125  | 44,63881   | 97,529505  | 83,132305  | 98,372525  | 0         | 0          | 0,02363    |
| ID347052        |                      | 99,69403                                  | 103,792005 | 106,81354  | 100,859795 | 101,89727  | 123,505885 | 81,42482   | 99,53706   | 100,1747   | 96,38336  | 87,987925  | 89,42095   |
| ID2340727       |                      | 105,38086                                 | 96,72409   | 130,036565 | 125,427995 | 90,933005  | 87,51563   | 98,36641   | 179,64739  | 121,14584  | 68,83592  | 108,99871  | 111,371425 |
| ID1017          |                      | 102,715735                                | 93,88115   | 119,70717  | 93,68617   | 89,083975  | 95,87516   | 59,49395   | 48,694975  | 65,318175  | 100,57102 | 71,174495  | 78,49595   |
| ID61022         |                      | 48,50716                                  | 59,355705  | 54,175665  | 83,828365  | 74,908185  | 68,76726   | 70,53261   | 69,06968   | 86,53181   | 64,3946   | 88,582915  | 87,776405  |
| ID1477          |                      | 105,090125                                | 120,794285 | 112,706535 | 126,588245 | 111,63741  | 111,98587  | 147,54183  | 145,746045 | 137,693405 | 105,89724 | 88,625395  | 81,66728   |
| ID351           |                      | 93,90148                                  | 92,965345  | 85,50367   | 122,63948  | 123,9565   | 143,302115 | 62,424255  | 41,13377   | 46,625425  | 15,4491   | 42,23918   | 57,481415  |
| ID1379          |                      | 99,30541                                  | 103,78633  | 106,74413  | 110,74301  | 125,95388  | 126,67059  | 71,754995  | 79,40071   | 81,2157    | 52,65429  | 63,589695  | 51,256235  |
| ID1911469       |                      | 98,6604                                   | 113,000005 | 99,847155  | 106,9474   | 113,78101  | 81,365965  | 61,86127   | 70,338835  | 81,25766   | 125,39405 | 134,51135  | 131,969515 |
| ID749           |                      | 120,788235                                | 81,971075  | 121,37984  | 71,02086   | 64,182375  | 53,53123   | 243,335125 | 271,19386  | 240,095925 | 158,86069 | 151,539415 | 118,352005 |
| ID1151          |                      | 82,605375                                 | 99,74517   | 83,24822   | 78,587935  | 76,06042   | 84,20647   | 67,34096   | 59,484855  | 70,57011   | 73,21351  | 66,02352   | 59,281145  |
| ID425876        |                      | 79,747625                                 | 85,82524   | 71,67621   | 111,669315 | 92,645485  | 92,309245  | 70,091375  | 78,472285  | 83,002695  | 99,86491  | 92,979205  | 90,896315  |
| ID331           |                      | 90,55219                                  | 85,343945  | 88,91503   | 95,816555  | 98,126105  | 71,509     | 95,014245  | 105,85378  | 92,393175  | 75,70371  | 114,224285 | 69,41683   |
| ID1648          |                      | 75,053465                                 | 84,833545  | 70,2534    | 119,80042  | 133,311    | 117,894795 | 57,51567   | 62,63197   | 66,69285   | 65,45784  | 87,374925  | 32,665035  |
| ID1994828       |                      | 136,161425                                | 151,22044  | 167,11965  | 271,094465 | 175,823865 | 178,90986  | 191,18362  | 189,22415  | 205,06698  | 114,2509  | 228,68546  | 118,222776 |
| ID2209869       |                      | 78,29805                                  | 87,168855  | 82,71662   | 86,703745  | 79,98745   | 51,47825   | 182,462355 | 187,498785 | 168,05393  | 97,96358  | 60,487545  | 43,22775   |
| ID1499          |                      | 138,217995                                | 200,174875 | 255,398235 | 156,693915 | 161,062335 | 113,679955 | 154,04175  | 234,651115 | 211,35599  | 67,0352   | 90,605135  | 89,826435  |
| ID3395583       |                      | 102,85834                                 | 97,316395  | 110,76302  | 122,12727  | 122,232335 | 107,862805 | 62,86723   | 70,426635  | 70,359     | 135,93695 | 73,45559   | 95,34693   |
| ID1181          |                      | 88,519835                                 | 88,26271   | 91,88925   | 105,25712  | 99,505235  | 100,891575 | 72,82862   | 76,314305  | 78,733415  | 83,83463  | 82,32419   | 91,30174   |
| ID463           |                      | 69,381215                                 | 74,421295  | 66,27172   | 115,35364  | 103,27835  | 135,41011  | 36,82093   | 61,188515  | 40,2627    | 105,5385  | 135,80361  | 134,887935 |
| ID242682        |                      | 81,565035                                 | 97,31956   | 90,05243   | 124,46063  | 115,97679  | 123,822785 | 66,35722   | 46,02344   | 50,161415  | 24,89373  | 55,21402   | 60,936635  |
| ID306           |                      | 56,943745                                 | 50,703175  | 58,384875  | 220,12324  | 267,186925 | 126,90253  | 53,75623   | 22,826105  | 12,8246    | 62,39053  | 67,45368   | 80,95834   |
| ID2110071       |                      | 100,928565                                | 115,674955 | 95,32706   | 178,42056  | 132,16878  | 155,346015 | 17,206025  | 15,014155  | 18,324545  | 21,60165  | 19,728275  | 26,71356   |
| ID1486          |                      | 87,691955                                 | 93,018765  | 98,446945  | 123,27965  | 133,20983  | 73,965725  | 57,613345  | 82,9919    | 73,517625  | 60,65876  | 165,68458  | 178,76286  |
| ID841           |                      | 124,4516                                  | 90,06208   | 101,14182  | 55,183705  | 48,51698   | 51,16802   | 246,86804  | 248,534205 | 224,7366   | 237,67207 | 195,04463  | 143,550755 |
| ID1233          |                      | 104,118515                                | 115,202745 | 105,144555 | 117,915015 | 95,789345  | 80,82898   | 59,70521   | 61,049385  | 68,679905  | 80,30705  | 60,22285   | 62,451785  |
| ID314           |                      | 96,731355                                 | 108,13342  | 89,15566   | 164,188675 | 147,10008  | 117,2749   | 55,439955  | 56,981495  | 52,66494   | 168,47583 | 81,377515  | 78,703135  |
| ID2108161       |                      | 98,41121                                  | 109,01152  | 100,257565 | 174,337115 | 109,372    | 108,19436  | 70,76658   | 239,0594   | 78,27965   | 74,71845  | 10,89616   | 28,35581   |
| ID114983        |                      | 94,363675                                 | 119,268345 | 81,8683    | 106,72113  | 84,80699   | 130,58276  | 43,875945  | 69,012525  | 64,359285  | 42,85498  | 72,585965  | 75,63005   |
| ID473357        |                      | 112,05864                                 | 118,725355 | 124,966305 | 115,434815 | 97,04952   | 96,78621   | 86,28712   | 111,35666  | 104,743205 | 23,22176  | 125,294455 | 129,235575 |
| ID476           |                      | 89,00079                                  | 93,048975  | 92,26404   | 115,35367  | 98,65896   | 98,642985  | 58,397695  | 49,13252   | 53,013425  | 70,36824  | 77,101035  | 83,13232   |
| ID1788919       |                      | 111,269445                                | 119,04348  | 117,37959  | 154,470435 | 139,473575 | 141,71591  | 67,454175  | 74,56153   | 80,767125  | 23,13393  | 51,459055  | 36,22427   |
| ID402           |                      | 105,79354                                 | 116,143225 | 106,59456  | 142,212255 | 146,651875 | 141,32827  | 60,22076   | 48,50847   | 51,049265  | 0         | 67,864535  | 70,84734   |
| ID449534        |                      | 102,488595                                | 106,12051  | 104,241575 | 115,23173  | 114,639905 | 123,91525  | 82,828025  | 79,155015  | 83,1146    | 79,21251  | 72,03713   | 87,98822   |
| ID16755         |                      | 135,224315                                | 135,27378  | 152,97788  | 74,146345  | 94,73654   | 104,793745 | 93,0135    | 95,70748   | 133,903775 | 74,74198  | 51,792345  | 45,53033   |
| ID4808          |                      | 88,412985                                 | 83,140215  | 80,540625  | 106,656295 | 95,38755   | 96,72629   | 81,88422   | 87,54206   | 87,149555  | 95,32626  | 93,12337   | 87,69992   |
| ID42780         |                      | 155,41556                                 | 94,37891   | 162,512135 | 57,390745  | 67,29188   | 44,134065  | 300,922395 | 429,302975 | 329,247825 | 229,14217 | 226,46821  | 149,724805 |
| ID3761682       |                      | 133,702295                                | 89,459375  | 108,91461  | 93,824045  | 76,256275  | 155,38212  | 178,15039  | 254,945435 | 223,82325  | 91,95881  | 127,706325 | 89,361685  |
| ID6662          |                      | 110,436265                                | 122,17984  | 102,669125 | 141,68698  | 138,281765 | 127,64622  | 82,731375  | 69,07143   | 90,25605   | 201,51808 | 86,89085   | 82,129295  |
| ID2300514       |                      | 147,794165                                | 192,933065 | 144,531325 | 93,207805  | 62,878235  | 33,57106   | 78,802035  | 76,479985  | 95,376625  | 388,95431 | 274,336455 | 205,42948  |
| ID3163353       |                      | 82,03348                                  | 82,27552   | 90,51836   | 121,8001   | 154,67914  | 163,41967  | 156,69698  | 101,50301  | 111,60204  | 106,44448 | 113,315315 | 111,77589  |
| ID328907        |                      | 76,326795                                 | 98,269765  | 44,398375  | 111,5915   | 92,062315  | 146,56415  | 59,44141   | 49,757665  | 52,112475  | 47,00001  | 50,616165  | 68,397605  |
| ID1158          |                      | 121,629685                                | 143,29404  | 146,423005 | 156,759705 | 131,80607  | 111,00577  | 43,51615   | 33,809155  | 43,848445  | 90,51886  | 97,725775  | 104,356855 |
| ID1189          |                      | 92,928645                                 | 103,6122   | 95,706425  | 112,18819  | 97,943115  | 86,652545  | 105,82626  | 94,02274   | 81,4423    | 89,50998  | 84,69004   | 91,19268   |
| ID2035512       |                      | 13,118245                                 | 9,781365   | 26,64175   | 45,48058   | 21,171585  | 130,634095 | 12,714145  | 19,973045  | 19,858755  | 36,38572  | 32,03229   | 48,66722   |
| ID6678          |                      | 94,488975                                 | 104,616    | 88,027325  | 125,270265 | 119,816075 | 108,05992  | 78,526525  | 63,069135  | 84,646225  | 196,02656 | 88,066465  | 81,580915  |
| ID305           |                      | 53,26108                                  | 118,48324  | 121,809095 | 205,07473  | 475,077105 | 135,41761  | 34,85512   | 36,35836   | 0,01695    | 56,61917  | 75,42808   | 94,178445  |

Table S-1

| ID <sup>1</sup> | Protein <sup>2</sup> | Median of normalized volumes <sup>3</sup> |            |            |            |            |            |            |            |            |           |            |            |
|-----------------|----------------------|-------------------------------------------|------------|------------|------------|------------|------------|------------|------------|------------|-----------|------------|------------|
|                 |                      | co_0 min                                  | co_30 min  | co_60 min  | co_24 h    | co_48 h    | co_72 h    | PI_0 min   | PI_30 min  | PI_60 min  | PI_24 h   | PI_48 h    | PI_72 h    |
| ID1982157       |                      | 92,46122                                  | 102,78431  | 93,391065  | 75,87785   | 63,22056   | 57,76269   | 54,620555  | 56,98805   | 64,545985  | 21,55481  | 17,503345  | 14,954295  |
| ID1991205       |                      | 107,427295                                | 100,11006  | 83,81642   | 657,272855 | 167,91068  | 296,81407  | 81,792685  | 108,83948  | 88,200045  | 107,12638 | n.d.       | 1168,75041 |
| ID33115         |                      | 109,59824                                 | 117,523625 | 132,40252  | 105,23216  | 114,835305 | 90,636495  | 98,57807   | 70,129315  | 113,55104  | 0,65859   | 68,43863   | 53,436405  |
| ID1266          |                      | 140,031425                                | 581,87228  | 112,709085 | 116,91519  | 89,383365  | 77,01924   | 143,427855 | 115,2337   | 91,60699   | 81,39847  | 88,125875  | 83,070055  |
| ID1814733       |                      | 127,57977                                 | 120,099    | 127,478965 | 141,787775 | 113,40309  | 121,26883  | 139,04236  | 175,131945 | 186,86639  | 396,53648 | 86,91187   | 55,34552   |
| ID2148299       |                      | 20,03609                                  | 23,860425  | 29,55533   | 48,379315  | 19,709955  | 71,330855  | 65,31455   | 60,91062   | 69,263185  | 31,59631  | 34,5504    | 23,185355  |
| ID1864524       |                      | 107,9477                                  | 125,788155 | 205,86641  | 81,85601   | 112,25786  | 185,561905 | 82,167815  | 85,90324   | 80,08436   | 128,02778 | 92,14427   | 74,85234   |
| ID1602          |                      | 66,175675                                 | 85,39294   | 71,21491   | 114,67009  | 100,16821  | 115,222595 | 69,0283    | 53,61175   | 55,88739   | 59,13485  | 106,67144  | 90,108325  |
| ID2094921       |                      | 119,648145                                | 134,73199  | 117,65371  | 115,446685 | 98,94297   | 57,548145  | 132,853285 | 116,648275 | 124,57756  | 157,37972 | 102,162625 | 72,633565  |
| ID182136        |                      | 60,719555                                 | 101,088775 | 138,20964  | 148,17739  | 151,797695 | 134,14895  | 79,737685  | 50,44434   | 52,204415  | 80,7496   | 75,10524   | 110,300915 |
| ID1542          |                      | 0,162955                                  | 0          | 0,283825   | 216,862855 | 211,91494  | 263,645595 | 0,940635   | 1,16339    | 5,348255   | 94,53905  | 60,319765  | 51,673405  |
| ID855           |                      | 104,85349                                 | 116,02353  | 121,90988  | 120,47166  | 107,610535 | 102,711065 | 84,085365  | 81,728225  | 101,857375 | 16,808745 | 86,999655  | 96,203705  |
| ID3763676       |                      | 106,658735                                | 127,56761  | 98,185085  | 172,484005 | 138,64554  | 109,5893   | 114,058985 | 128,119255 | 163,10038  | 69,30179  | 66,1028    | 36,863245  |
| ID613           |                      | 109,30221                                 | 117,636025 | 115,428135 | 159,670695 | 147,602805 | 130,14685  | 20,383165  | 35,41969   | 53,68135   | 28,46991  | 16,280185  | 39,53792   |
| ID948           |                      | 69,80362                                  | 85,11734   | 77,08213   | 114,702925 | 107,1164   | 93,867505  | 77,619115  | 67,331455  | 67,14692   | 64,25744  | 74,932865  | 68,73748   |
| ID1795          |                      | 36,619975                                 | 38,32287   | 43,123255  | 70,48327   | 87,67998   | 117,42931  | 42,305155  | 64,57696   | 38,70106   | 86,98667  | 65,51389   | 70,700255  |
| ID443           |                      | 109,73064                                 | 99,176065  | 112,18984  | 83,344255  | 94,56566   | 125,045935 | 104,029635 | 109,17279  | 110,13557  | 117,82685 | 120,139055 | 101,58892  |
| ID393893        |                      | 99,75348                                  | 112,06361  | 101,98497  | 120,849525 | 118,50978  | 156,54393  | 67,21992   | 47,113635  | 44,11143   | 23,15296  | 33,316255  | 44,85242   |
| ID1707          |                      | 71,160045                                 | 64,31283   | 82,01623   | 284,97137  | 277,20566  | 667,558595 | 68,38147   | 67,913305  | 73,01447   | 7,9952    | 171,21148  | 113,73413  |
| ID2439918       |                      | 92,374925                                 | 98,54388   | 101,834995 | 102,9207   | 118,73859  | 88,819055  | 78,690675  | 67,842025  | 66,086955  | 139,29202 | 74,59456   | 72,73219   |
| ID1100          |                      | 115,64994                                 | 117,305765 | 122,467265 | 135,488015 | 113,594555 | 129,191935 | 165,197785 | 86,127985  | 73,639095  | 37,44959  | 72,45817   | 75,45592   |
| ID216132        |                      | 107,058665                                | 105,8716   | 135,140515 | 103,39589  | 125,88449  | 163,916715 | 58,55061   | 66,89533   | 71,73375   | 72,77259  | 122,5029   | 138,961495 |
| ID200032        |                      | 57,504155                                 | 66,74027   | 64,653435  | 69,32628   | 83,575395  | 94,995905  | 70,11497   | 65,0583    | 83,19979   | 71,257    | 68,408335  | 59,85726   |
| ID519           |                      | 114,146125                                | 125,621005 | 102,96131  | 145,82664  | 123,14665  | 146,809655 | 73,667895  | 65,106125  | 56,145225  | 61,51256  | 70,029615  | 70,85437   |
| ID1609          |                      | 122,00632                                 | 130,22599  | 136,249055 | 92,328045  | 108,8592   | 98,197625  | 172,55254  | 186,148445 | 184,239445 | 106,86075 | 77,045985  | 71,595755  |
| ID1505          |                      | 120,52237                                 | 134,07987  | 130,99778  | 132,744005 | 126,10774  | 120,17041  | 62,929245  | 71,30164   | 83,38152   | 105,63365 | 87,821635  | 92,325965  |
| ID412           |                      | 141,1698                                  | 93,149695  | 131,484575 | 72,14501   | 63,58292   | 78,157165  | 210,469185 | 214,082645 | 208,81785  | 198,67281 | 155,984185 | 106,131195 |
| ID1763758       |                      | 78,546805                                 | 73,584475  | 68,14913   | 163,8615   | 116,25375  | 113,340365 | 38,86905   | 22,168675  | 26,71627   | 27,67995  | 6,11086    | 16,19445   |
| ID1057          |                      | 118,49537                                 | 152,15813  | 147,66842  | 115,54432  | 102,133335 | 170,132465 | 45,69288   | 62,64501   | 67,145415  | 80,39359  | 142,57035  | 79,262065  |
| ID1283          |                      | 112,30181                                 | 129,105255 | 108,441575 | 132,161495 | 128,368025 | 118,95788  | 73,23148   | 74,707745  | 78,319795  | 102,20544 | 100,217955 | 89,12382   |
| ID3483954       |                      | 131,25986                                 | 97,005305  | 106,92226  | 75,616295  | 71,24265   | 67,054125  | 218,66685  | 241,14668  | 224,575515 | 187,96626 | 168,047835 | 125,310705 |
| ID2024619       |                      | 138,674675                                | 195,98616  | 138,997905 | 450,726545 | 569,105705 | 182,34976  | 86,920865  | 69,223165  | 118,79651  | 72,10986  | 6,69303    | 32,734665  |
| ID257339        |                      | 94,703175                                 | 109,757075 | 102,7343   | 107,92634  | 120,49249  | 102,24559  | 56,76886   | 53,16074   | 62,59463   | 75,94552  | 68,71879   | 62,050015  |
| ID313877        |                      | 94,35545                                  | 91,46163   | 91,535945  | 118,90834  | 140,068845 | 123,55673  | 57,120545  | 49,276285  | 53,99212   | 35,86646  | 84,298075  | 98,021345  |
| ID51068         |                      | 95,15126                                  | 112,502725 | 97,838955  | 114,86235  | 139,15171  | 112,04902  | 57,767455  | 53,40309   | 66,197935  | 77,61793  | 73,429535  | 64,38711   |
| ID2944561       |                      | 100,00936                                 | 127,351465 | 86,090155  | 122,686505 | 83,29941   | 50,11967   | 40,60685   | 47,318745  | 56,83289   | 99,79661  | 96,81073   | 58,92048   |
| ID3763623       |                      | 106,13919                                 | 100,49331  | 110,66636  | 102,863515 | 93,16204   | 88,505715  | 141,03194  | 144,33797  | 135,10668  | 132,18857 | 117,23904  | 92,576375  |
| ID17707         |                      | 96,412185                                 | 82,091935  | 86,95306   | 76,985775  | 69,642465  | 114,65016  | 129,005445 | 246,601    | 149,730335 | 183,686   | 150,73024  | 124,97325  |
| ID283779        |                      | 87,88794                                  | 97,550505  | 94,94522   | 109,08693  | 98,701495  | 112,663165 | 69,348475  | 54,5822    | 66,645405  | 76,29034  | 58,69218   | 58,414935  |
| ID338           |                      | 81,08227                                  | 88,085045  | 77,97247   | 156,52138  | 451,81225  | n.d.       | 61,23345   | 104,90754  | 135,71778  | 1,99128   | 30,52583   | 16,78423   |
| ID3477702       |                      | 111,978395                                | 71,690085  | 87,04425   | 49,4565    | 38,559985  | 44,54373   | 191,63158  | 168,36276  | 183,583535 | 191,55305 | 176,415015 | 118,192085 |
| ID525           |                      | 88,803885                                 | 92,67589   | 88,03062   | 141,29972  | 136,635955 | 152,50753  | 50,093375  | 47,60587   | 47,220035  | 46,739    | 76,987545  | 75,02778   |
| ID1980208       |                      | 174,05123                                 | 115,82479  | 113,874775 | 119,09187  | 161,4023   | 122,167165 | 194,39071  | 151,58273  | 180,106145 | 14,275    | 156,95651  | 58,886415  |
| ID1299          |                      | 10,616345                                 | 10,599385  | 35,850255  | 545,8594   | 734,796845 | 203,71603  | 23,963795  | 7,941545   | 6,48767    | 22,9532   | 186,276095 | 72,546615  |
| ID1523          |                      | 90,836055                                 | 94,51028   | 104,679625 | 103,385295 | 88,1907    | 70,6622    | 74,816885  | 64,624135  | 72,56329   | 131,59305 | 90,953355  | 84,26218   |
| ID1437          |                      | 84,079715                                 | 92,7382    | 85,096635  | 111,239645 | 102,97431  | 106,869525 | 61,996445  | 62,61052   | 70,586     | 70,1053   | 72,94573   | 54,237795  |
| ID464690        |                      | 59,52291                                  | 63,30806   | 58,49845   | 107,7162   | 106,19204  | 133,616755 | 41,19211   | 35,62213   | 40,440925  | 22,38541  | 60,89979   | 73,700835  |
| ID2060826       |                      | 108,12546                                 | 120,415515 | 100,34692  | 155,54249  | 133,544085 | 219,34177  | 75,95439   | 68,896465  | 67,236175  | 108,47096 | 80,269145  | 79,59704   |
| ID1414          |                      | 89,36145                                  | 91,126605  | 97,95388   | 94,540145  | 109,70883  | 121,051995 | 75,891565  | 72,165225  | 90,654075  | 108,21636 | 80,84028   | 87,601915  |
| ID2089255       |                      | 110,24791                                 | 118,66529  | 112,006315 | 112,554995 | 110,794145 | 72,62658   | 116,965035 | 113,967565 | 119,642735 | 79,61286  | 86,41638   | 75,431165  |
| ID484           |                      | 96,09296                                  | 109,29485  | 96,478975  | 123,88156  | 105,891635 | 115,574275 | 57,05688   | 48,79563   | 50,279525  | 66,89533  | 72,044105  | 78,87754   |
| ID169541        |                      | 98,871295                                 | 110,523485 | 99,377905  | 128,68613  | 103,55603  | 93,278045  | 112,09222  | 90,384795  | 87,665515  | 106,56675 | 55,534335  | 47,618765  |
| ID1327          |                      | 408,41921                                 | 1297,18522 | 0,211435   | 687,88032  | 1764,04447 | 482,017065 | 373,948275 | 117,10928  | 733,33164  | 4,76075   | 0          | 0          |
| ID3762278       |                      | 139,71569                                 | 153,547295 | 161,03456  | 160,591755 | 144,31537  | 175,032515 | 145,719795 | 155,272975 | 121,410745 | 234,24386 | 152,664215 | 126,256775 |
| ID229688        |                      | 105,756225                                | 153,441915 | 110,040395 | 119,23958  | 98,03825   | 85,491135  | 133,296825 | 115,476755 | 95,988315  | 100,22624 | 116,553355 | 107,72219  |
| ID30544         |                      | 114,74408                                 | 100,90717  | 124,44036  | 128,15279  | 111,34775  | 144,32885  | 120,273955 | 105,1175   | 121,459025 | 94,38579  | 103,707845 | 99,306775  |
| ID411894        |                      | 79,76005                                  | 97,58263   | 86,079835  | 99,44222   | 81,28203   | 101,42455  | 85,01741   | 64,14461   | 63,51668   | 58,85813  | 70,52642   | 79,685575  |

Table S-1

| ID <sup>1</sup> | Protein <sup>2</sup> | Median of normalized volumes <sup>3</sup> |            |            |            |            |            |            |            |            |           |            |            |
|-----------------|----------------------|-------------------------------------------|------------|------------|------------|------------|------------|------------|------------|------------|-----------|------------|------------|
|                 |                      | co_0 min                                  | co_30 min  | co_60 min  | co_24 h    | co_48 h    | co_72 h    | PI_0 min   | PI_30 min  | PI_60 min  | PI_24 h   | PI_48 h    | PI_72 h    |
| ID2308652       |                      | 113,417885                                | 107,845875 | 121,572935 | 150,54395  | 190,53595  | 157,25173  | 87,548255  | 65,68559   | 65,5301    | 35,40971  | 66,833355  | 61,22512   |
| ID1000          |                      | 95,990875                                 | 128,172155 | 93,382295  | 175,547295 | 170,825405 | 99,957335  | 36,86039   | 33,05804   | 50,327515  | 70,70423  | 71,374525  | 81,526345  |
| ID722           |                      | 119,89624                                 | 79,129405  | 97,965355  | 52,344305  | 42,95783   | 46,925515  | 197,81941  | 168,5571   | 174,932655 | 198,3249  | 179,56002  | 127,948705 |
| ID1989367       |                      | 118,33517                                 | 109,556705 | 125,90003  | 90,95702   | 204,66582  | 183,5569   | 177,75638  | 191,79671  | 200,911265 | 147,90195 | 200,792595 | 346,410115 |
| ID2889441       |                      | 13,65284                                  | 18,584975  | 12,483565  | 53,31529   | 35,50877   | 62,19249   | 54,477245  | 53,851385  | 54,072455  | 72,96074  | 55,8643    | 47,32105   |
| ID339           |                      | 100,499345                                | 111,91526  | 102,24177  | 122,13104  | 140,458105 | 112,46349  | 93,67638   | 89,130565  | 74,626595  | 58,81371  | 83,27151   | 73,67042   |
| ID83942         |                      | 107,646215                                | 125,850575 | 117,598065 | 101,173875 | 91,69005   | 86,621805  | 67,76375   | 76,120515  | 83,627955  | 61,98     | 59,275885  | 58,270715  |
| ID157378        |                      | 72,213525                                 | 76,99236   | 65,11875   | 123,517765 | 100,109835 | 75,86909   | 79,612035  | 69,1428    | 67,49497   | 81,53301  | 69,42125   | 71,116965  |
| ID2617667       |                      | 81,19187                                  | 83,76411   | 93,154375  | 113,7421   | 192,995575 | 108,07208  | 68,66319   | 97,557     | 74,68417   | 103,33284 | 83,539675  | 106,77857  |
| ID1617          |                      | 191,018045                                | 234,79487  | 262,14189  | 120,814735 | 105,081765 | 115,559525 | 68,019525  | 111,42292  | 142,83006  | 17,65867  | 29,169865  | 28,39733   |
| ID75108         |                      | 242,630185                                | 299,740795 | 186,91907  | 198,396335 | 166,36731  | 130,5464   | 189,36652  | 252,32276  | 267,08337  | 137,19248 | 138,74396  | 173,568105 |
| ID388           |                      | 99,729385                                 | 111,406395 | 96,14418   | 152,159845 | 174,022665 | 178,180825 | 66,100015  | 38,54121   | 27,60137   | 17,99027  | 37,73583   | 38,61153   |
| ID303936        |                      | 72,74235                                  | 65,936595  | 74,146555  | 90,22996   | 93,07594   | 108,740135 | 49,99362   | 54,97748   | 55,395755  | 128,84967 | 105,962175 | 101,16285  |
| ID403           |                      | 116,723745                                | 131,53012  | 115,299385 | 163,759755 | 157,6365   | 151,140495 | 61,804905  | 48,80174   | 44,90327   | 0         | 70,03968   | 71,43442   |
| ID1212          |                      | 71,6903                                   | 183,56593  | 29,74337   | 101,6711   | 33,659775  | 60,81902   | 280,56535  | 1410,96983 | 184,70646  | 151,94387 | 144,29118  | 144,692025 |
| ID97395         |                      | 120,87866                                 | 105,38471  | 125,754345 | 98,32714   | 98,424595  | 93,440705  | 119,297465 | 140,64678  | 118,040395 | 119,79238 | 118,822305 | 100,993015 |
| ID48852         |                      | 97,109585                                 | 88,65739   | 89,839485  | 109,06343  | 94,286975  | 107,07189  | 99,269005  | 108,81563  | 98,29178   | 95,45093  | 138,5642   | 113,82699  |
| ID2042668       |                      | 99,798995                                 | 109,5632   | 91,437445  | 120,74907  | 131,595145 | 172,34491  | 86,328725  | 70,170625  | 83,2387    | 33,05122  | 82,49514   | 75,83708   |
| ID1762          |                      | 104,83737                                 | 132,74045  | 114,315325 | 133,66884  | 116,3255   | 113,11707  | 123,18382  | 109,480275 | 107,03903  | 81,76005  | 75,810995  | 72,77433   |
| ID129210        |                      | 100,764365                                | 108,329405 | 95,036535  | 110,798325 | 109,79579  | 107,290325 | 66,002365  | 72,910455  | 67,26285   | 112,07605 | 88,357255  | 73,51552   |
| ID423           |                      | 124,313925                                | 101,54507  | 120,00813  | 83,659695  | 86,293095  | 90,89053   | 150,612535 | 173,00208  | 165,81178  | 152,69159 | 136,421145 | 102,292545 |
| ID110384        |                      | 139,798265                                | 169,139745 | 149,12106  | 190,202535 | 113,534985 | 74,127005  | 70,02823   | 60,463355  | 68,311275  | 72,42447  | 71,34397   | 45,033645  |
| ID3046761       |                      | 71,10044                                  | 76,48113   | 84,52904   | 86,38091   | 76,00527   | 56,174975  | 61,31531   | 73,127605  | 73,75822   | 64,52745  | 41,237565  | 40,15835   |
| ID1178          |                      | 81,12985                                  | 83,97805   | 119,78399  | 67,78683   | 60,57296   | 44,26125   | 85,52406   | 186,96429  | 89,0309    | 72,72006  | 166,956525 | 53,69828   |
| ID85707         |                      | 102,032025                                | 112,278385 | 107,792365 | 110,463885 | 119,081175 | 120,44338  | 85,65261   | 80,854125  | 86,4756    | 85,78351  | 80,789555  | 84,03698   |
| ID245554        |                      | 92,90146                                  | 140,70943  | 97,17048   | 334,13569  | 115,70277  | 96,735685  | 32,60438   | 29,46911   | 48,887685  | 86,30065  | 207,02777  | 180,57468  |
| ID1821608       |                      | 123,623035                                | 114,65175  | 125,837805 | 112,285545 | 58,089115  | 102,840585 | 144,83431  | 149,711665 | 151,368715 | 190,53794 | 82,820085  | 89,77911   |
| ID23217         |                      | 99,563525                                 | 109,086855 | 100,63961  | 144,746065 | 130,89409  | 142,744865 | 63,74182   | 51,55476   | 56,38622   | 53,13143  | 71,75488   | 76,432235  |
| ID412768        |                      | 91,95298                                  | 104,73627  | 96,892115  | 122,788845 | 106,81926  | 147,694895 | 78,730925  | 46,010595  | 48,713875  | 57,76836  | 71,84267   | 75,59148   |
| ID3763670       |                      | 6,15666                                   | 3,126245   | 1,4085     | 86,707135  | 30,714525  | 91,10262   | 3,406925   | 0          | 0          | 18,6275   | 19,066785  | 22,422705  |
| ID132415        |                      | 135,847235                                | 83,005205  | 133,728135 | 44,476515  | 43,52462   | 33,90828   | 293,211725 | 336,78432  | 326,234625 | 184,61358 | 184,253405 | 123,213035 |
| ID1543          |                      | 150,178135                                | 47,83824   | 22,144245  | 170,077925 | 289,019135 | 292,408905 | 24,644275  | 2,843475   | 12,37859   | 6,93089   | 26,157595  | 9,961305   |
| ID16834         |                      | 92,858575                                 | 105,9707   | 106,2982   | 135,76404  | 123,181725 | 127,687845 | 46,54601   | 53,85108   | 62,47343   | 80,39854  | 83,92065   | 83,926165  |
| ID145564        |                      | 90,48723                                  | 81,95474   | 96,21033   | 128,995425 | 104,570915 | 121,702435 | 68,754005  | 58,45473   | 52,96208   | 87,89668  | 80,779585  | 93,911235  |
| ID1082          |                      | 5,832335                                  | 10,574655  | 14,711885  | 99,762895  | 75,33068   | 107,69725  | 48,62756   | 41,895905  | 37,999075  | 127,00698 | 70,81557   | 75,604375  |
| ID319           |                      | 92,787515                                 | 98,517865  | 85,485705  | 184,15972  | 151,748945 | 133,173385 | 49,48551   | 43,281305  | 23,266195  | 45,46134  | 0          | 18,505805  |
| ID66993         |                      | 43,295785                                 | 49,561575  | 47,617235  | 77,325625  | 66,561585  | 65,568395  | 36,51888   | 33,482135  | 40,81499   | 60,27496  | 68,92942   | 67,626525  |
| ID437           |                      | 115,8849                                  | 103,55278  | 116,876465 | 89,591495  | 87,49445   | 103,895275 | 122,92308  | 142,50286  | 132,94414  | 141,57661 | 137,5722   | 105,508575 |
| ID2194613       |                      | 113,743605                                | 138,379535 | 124,925105 | 175,34911  | 117,864485 | 96,69673   | 66,970285  | 41,34032   | 62,66765   | 28,98478  | 16,40252   | 19,479865  |
| ID2140633       |                      | 115,49914                                 | 104,785045 | 127,533995 | 160,721985 | 150,43366  | 139,06072  | 66,78717   | 56,448205  | 93,571345  | 14,09545  | 79,001605  | 6,749065   |
| ID1340          |                      | 96,10713                                  | 133,68583  | 121,027065 | 99,036485  | 136,669    | 100,007715 | 136,00622  | 90,35937   | 86,46295   | 198,45272 | 94,57157   | 109,172355 |
| ID1993029       |                      | 113,259375                                | 126,611725 | 125,630225 | 160,618215 | 500,94151  | 149,773015 | 106,799245 | 91,665665  | 103,21757  | 203,82226 | n.d.       | n.d.       |
| ID15367         |                      | 76,084465                                 | 95,46457   | 80,431885  | 80,673545  | 36,5609    | 70,351155  | 67,33845   | 74,16664   | 58,913115  | 16,74382  | 7,63457    | 8,93526    |
| ID5909          |                      | 68,397905                                 | 69,202685  | 74,370685  | 93,96609   | 102,90098  | 128,00623  | 71,811395  | 36,207915  | 41,46177   | 29,61348  | 52,716795  | 55,95523   |
| ID3184881       |                      | 132,98616                                 | 145,6626   | 137,1061   | 108,88398  | 70,428705  | 99,89513   | 93,298875  | 102,08789  | 100,10281  | 114,40052 | 145,072325 | 97,877785  |
| ID2302886       |                      | 95,41636                                  | 103,111105 | 102,258155 | 122,23338  | 120,181905 | 94,715805  | 65,2971    | 66,93409   | 76,146155  | 71,47992  | 11,86405   | 175,89909  |
| ID265686        |                      | 196,075685                                | 141,552485 | 232,09298  | 97,209535  | 83,252115  | 49,240805  | 289,58059  | 348,45686  | 313,2265   | 178,66838 | 207,518915 | 170,999665 |
| ID3499167       |                      | 109,49316                                 | 114,896825 | 129,4829   | 337,76658  | 295,148395 | 715,64671  | 154,50742  | 172,40353  | 165,43831  | 0         | 0          | 0          |
| ID1230          |                      | 74,94643                                  | 76,85744   | 80,916015  | 93,875655  | 74,925665  | 84,235705  | 102,17269  | 107,96794  | 100,515875 | 94,86051  | 93,766885  | 96,507285  |
| ID535941        |                      | 110,16886                                 | 117,94017  | 112,658305 | 103,91939  | 117,02335  | 124,33336  | 98,506095  | 95,58023   | 105,02662  | 135,54466 | 158,007255 | 133,794935 |
| ID2021577       |                      | 103,103415                                | 114,908875 | 105,071595 | 110,17457  | 105,7323   | 110,56227  | 79,96107   | 82,223845  | 89,953285  | 97,20933  | 69,847335  | 68,604715  |
| ID416           |                      | 129,61369                                 | 83,20653   | 122,78051  | 86,027085  | 64,42794   | 86,744165  | 218,643285 | 234,27919  | 221,21724  | 174,10507 | 220,711565 | 111,58732  |
| ID674           |                      | 66,060645                                 | 69,616755  | 71,707455  | 109,34764  | 95,3999    | 109,232255 | 54,22444   | 52,99364   | 58,829355  | 139,48084 | 75,565075  | 84,74179   |
| ID1298          |                      | 102,340315                                | 109,718985 | 111,40939  | 132,82026  | 137,316495 | 124,53328  | 99,40892   | 87,72809   | 100,653555 | 11,14585  | 95,8318    | 94,209035  |
| ID1717          |                      | 83,526945                                 | 113,789685 | 95,613725  | 102,197435 | 83,33527   | 66,12385   | 57,701585  | 91,06999   | 67,65924   | 21,19669  | 34,38391   | 37,336695  |
| ID2447768       |                      | 135,46063                                 | 111,837215 | 96,370225  | 65,82755   | 86,11389   | 193,907585 | 92,555105  | 78,89927   | 89,19382   | 87,88066  | 99,8512    | 87,88066   |
| ID562964        |                      | 102,68908                                 | 101,72072  | 105,55125  | 107,626575 | 90,485285  | 118,22309  | 102,69778  | 117,841575 | 108,29101  | 128,40529 | 115,55477  | 95,62231   |

Table S-1

| ID <sup>1</sup> | Protein <sup>2</sup> | Median of normalized volumes <sup>3</sup> |            |             |            |            |            |             |             |            |           |            |            |
|-----------------|----------------------|-------------------------------------------|------------|-------------|------------|------------|------------|-------------|-------------|------------|-----------|------------|------------|
|                 |                      | co_0 min                                  | co_30 min  | co_60 min   | co_24 h    | co_48 h    | co_72 h    | PI_0 min    | PI_30 min   | PI_60 min  | PI_24 h   | PI_48 h    | PI_72 h    |
| ID296837        |                      | 121,485325                                | 132,38098  | 138,048165  | 131,05493  | 134,14959  | 144,661265 | 87,886165   | 94,247715   | 89,85351   | 127,18764 | 96,86914   | 107,92445  |
| ID352255        |                      | 99,155925                                 | 79,97076   | 100,2375    | 84,22372   | 63,22364   | 58,90475   | 174,28355   | 205,25715   | 186,005595 | 146,1439  | 157,521015 | 134,269695 |
| ID1439          |                      | 93,841245                                 | 99,536625  | 101,307475  | 98,487875  | 101,67295  | 100,01692  | 100,771325  | 125,015935  | 107,019625 | 114,51049 | 91,482875  | 90,745825  |
| ID1709          |                      | 95,942395                                 | 106,878415 | 94,429415   | 120,561455 | 118,306345 | 119,581335 | 63,687175   | 64,545475   | 75,119375  | 78,71439  | 74,053735  | 75,1848    |
| ID747           |                      | 127,68576                                 | 85,44531   | 101,818465  | 55,489505  | 46,69726   | 48,593285  | 206,93763   | 200,753595  | 195,748445 | 204,99229 | 184,15927  | 132,70701  |
| ID311244        |                      | 71,124695                                 | 68,87837   | 72,220415   | 80,726565  | 62,765015  | 92,513005  | 45,550165   | 37,020215   | 39,83151   | 39,39977  | 57,61546   | 57,00398   |
| ID1124          |                      | 97,936945                                 | 193,83753  | 143,48444   | 174,586675 | 126,537845 | 144,4837   | 66,180265   | 70,8032     | 80,496425  | 107,80558 | 103,50847  | 128,22544  |
| ID3352574       |                      | 179,464335                                | 200,99637  | 174,59288   | 146,3633   | 135,426455 | 145,880725 | 132,584685  | 118,039235  | 111,959235 | 88,68243  | 86,9678    | 99,197705  |
| ID7106          |                      | 54,872685                                 | 60,883025  | 57,25489    | 64,768585  | 63,74518   | 110,423095 | 58,962655   | 55,95504    | 61,74834   | 146,04922 | 87,36495   | 81,177145  |
| ID466049        |                      | 78,46424                                  | 93,164605  | 92,921865   | 135,91799  | 146,286085 | 161,046395 | 61,5975     | 44,536805   | 36,921595  | 0         | 58,23113   | 55,97565   |
| ID3763800       |                      | 141,1878                                  | 146,5268   | 168,60673   | 229,27321  | 489,894195 | 663,097245 | 128,028225  | 163,06857   | 165,76453  | 24,04339  | 97,79595   | 33,985975  |
| ID482337        |                      | 78,111155                                 | 79,793565  | 77,36456    | 104,759485 | 94,895755  | 107,118345 | 71,722475   | 66,379      | 70,69985   | 274,85099 | 85,15999   | 86,58473   |
| ID1785181       |                      | 113,97463                                 | 113,705245 | 116,138995  | 175,297335 | 141,91577  | 141,525225 | 42,323465   | 8,08334     | 60,01083   | 27,56462  | 29,634655  | 5,24409    |
| ID43156         |                      | 148,798185                                | 94,292065  | 143,51259   | 42,821555  | 53,87085   | 48,207505  | 302,05952   | 408,70271   | 335,76833  | 242,36858 | 205,01356  | 141,457885 |
| ID1631          |                      | 103,359555                                | 122,731765 | 97,544175   | 140,947015 | 136,37136  | 115,40547  | 69,41004    | 59,33449    | 84,837925  | 81,97167  | 92,91114   | 99,72205   |
| ID748           |                      | 133,75644                                 | 89,325455  | 107,18966   | 56,403045  | 49,253855  | 50,196665  | 228,826505  | 229,73712   | 224,591065 | 207,25137 | 189,50912  | 136,33873  |
| ID109442        |                      | 128,95946                                 | 182,937135 | 121,536335  | 208,684395 | 85,376465  | 76,80189   | 90,57233    | 63,24082    | 90,266305  | 146,36363 | 67,808915  | 49,367915  |
| ID1964508       |                      | 95,392435                                 | 107,64023  | 101,152015  | 190,3299   | 203,0251   | 118,506485 | 98,964125   | 86,71229    | 87,744235  | 140,93841 | 183,51852  | 348,416685 |
| ID337908        |                      | 101,67667                                 | 82,347765  | 100,61099   | 94,81932   | 36,994085  | 48,322735  | 138,162105  | 401,63551   | 186,87428  | 209,15083 | 124,28319  | 97,132095  |
| ID91144         |                      | 77,577135                                 | 84,403745  | 79,1149     | 114,497025 | 110,672475 | 156,83609  | 49,972285   | 47,69467    | 53,834895  | 77,10786  | 86,219165  | 83,73022   |
| ID3761685       |                      | 45,96661                                  | 46,65017   | 43,090195   | 77,654795  | 69,98484   | 68,684035  | 64,10932    | 39,56289    | 68,81837   | 101,68188 | 71,9825    | 53,02381   |
| ID2215889       |                      | 99,49995                                  | 110,17998  | 110,46249   | 139,689875 | 106,466705 | 131,047275 | 102,11382   | 95,212275   | 87,02183   | 54,37943  | 59,38687   | 64,047125  |
| ID135817        |                      | 119,48953                                 | 109,586895 | 163,217965  | 207,16896  | 147,32437  | 71,79798   | 258,783525  | 409,074365  | 307,055745 | 150,374   | 120,11914  | 80,982345  |
| ID2575          |                      | 83,942785                                 | 96,94598   | 94,170795   | 117,676165 | 120,176475 | 112,370705 | 73,95932    | 72,21492    | 82,57299   | 115,95596 | 99,590145  | 89,78905   |
| ID733           |                      | 69,370025                                 | 92,947145  | 31,104135   | 131,016855 | 52,915885  | 95,21994   | 117,927185  | 97,468825   | 94,60762   | 23,79307  | 57,64783   | 43,35517   |
| ID1601          |                      | 107,07865                                 | 142,53638  | 98,611425   | 205,364795 | 286,492075 | 216,28352  | n.d.        | 59,48551    | 9168,95591 | 57,79218  | 9,50059    | 1,159135   |
| ID160578        |                      | n.d.                                      | 472,01062  | 24264,69615 | 122,2863   | 166,98304  | 115,26689  | 123,00083   | 118,50005   | 142,86253  | 115,9354  | 118,011315 | 133,08858  |
| ID1464          |                      | 96,431105                                 | 87,97291   | 167,084165  | 199,277715 | 84,637195  | 64,689435  | 61,339445   | 208,784215  | 117,4721   | 44,29028  | 85,72295   | 152,06338  |
| ID2051821       |                      | 91,23976                                  | 102,339305 | 83,22725    | 167,39694  | 134,211625 | 121,429525 | 59,0512     | 59,03495    | 54,9479    | 171,6132  | 83,00392   | 74,26399   |
| ID2292906       |                      | 93,092515                                 | 102,845565 | 93,53902    | 139,45205  | 98,968705  | 71,9136    | 65,822845   | 73,909095   | 68,348795  | 97,76356  | 47,743795  | 48,03282   |
| ID2113599       |                      | 68,6378                                   | 81,121855  | 69,774225   | 95,18813   | 107,65805  | 139,2689   | 49,32419    | 43,851365   | 29,86131   | 41,20719  | 43,52449   | 55,877305  |
| ID1799192       |                      | 133,127785                                | 108,69694  | 126,463705  | 103,911035 | 84,48745   | 83,381485  | 217,46371   | 351,602815  | 226,290025 | 241,60813 | 165,76543  | 106,156735 |
| ID1182          |                      | 110,46495                                 | 88,58362   | 121,657455  | 122,730275 | 136,24451  | 138,5552   | 60,850845   | 54,726255   | 52,74407   | 54,58602  | 54,378305  | 66,14087   |
| ID500           |                      | 61,943495                                 | 57,270205  | 56,85363    | 114,708395 | 125,02718  | 175,81731  | 37,8281     | 70,31466    | 48,16008   | 71,25701  | 58,576355  | 77,17108   |
| ID3762592       |                      | 79,8157                                   | 85,04744   | 89,836335   | 109,28763  | 119,094405 | 136,80685  | 145,26007   | 129,520995  | 118,365165 | 97,80786  | 104,50191  | 118,060055 |
| ID589630        |                      | 73,4083                                   | 74,76779   | 72,54069    | 120,227115 | 122,39068  | 133,214615 | 55,02316    | 41,353695   | 58,519445  | 0         | 71,172225  | 71,182265  |
| ID233300        |                      | 48,4171                                   | 59,64703   | 43,11795    | 119,36665  | 100,247765 | 92,810995  | 45,62118    | 18,37495    | 33,343165  | 101,13292 | 80,56721   | 84,814515  |
| ID1125          |                      | 128,60459                                 | 124,544455 | 155,47471   | 146,681885 | 133,516625 | 137,76168  | 88,14703    | 72,624125   | 74,162975  | 77,04886  | 89,40761   | 99,406205  |
| ID1410          |                      | 150,47977                                 | 162,92156  | 197,99021   | 116,721415 | 114,147955 | 117,6944   | 143,186655  | 243,07556   | 153,040715 | 83,17646  | 56,563355  | 51,82906   |
| ID2305694       |                      | 103,888125                                | 152,79827  | 103,72685   | 120,59264  | 110,253505 | 110,473845 | 109,2442    | 110,54522   | 92,46037   | 96,18981  | 106,376545 | 87,286075  |
| ID1933424       |                      | 75,884965                                 | 80,71388   | 71,622055   | 89,926165  | 217,77776  | 181,69079  | 84,274615   | 64,39741    | 77,49055   | 79,55715  | 163,706215 | 492,06831  |
| ID196961        |                      | 65,41883                                  | 66,39856   | 66,538235   | 112,846005 | 105,781075 | 133,14146  | 53,168915   | 62,053965   | 49,177655  | 64,57115  | 69,18858   | 77,62957   |
| ID1721          |                      | 855,32587                                 | 1132,87762 | 392,49152   | 112,674615 | 73,70603   | 24,19437   | 1351,253115 | 14010,96446 | 875,98422  | 66,29721  | 125,264885 | 94,492565  |
| ID3170569       |                      | 71,63974                                  | 77,052295  | 80,58867    | 70,231235  | 88,01424   | 103,69971  | 118,91263   | 114,011665  | 115,19002  | 81,44196  | 75,028525  | 88,96313   |
| ID1577          |                      | 64,51905                                  | 67,91477   | 61,533825   | 174,77498  | 102,629625 | 123,99583  | 82,832665   | 46,196665   | 58,02591   | 172,08555 | 106,022895 | 100,13943  |
| ID3763666       |                      | 129,32731                                 | 127,001115 | 129,361385  | 103,1266   | 108,37119  | 117,521765 | 71,343125   | 67,251575   | 66,93323   | 52,01199  | 58,30262   | 65,708735  |
| ID1580          |                      | 100,446195                                | 119,69484  | 112,45448   | 104,2439   | 101,60399  | 90,000655  | 92,129385   | 90,09551    | 102,700215 | 98,93     | 88,47954   | 80,19711   |
| ID156308        |                      | 92,831475                                 | 98,68756   | 107,029135  | 149,069795 | 116,210815 | 98,76728   | 84,14302    | 82,524925   | 94,79875   | 56,94023  | 73,20246   | 68,715625  |
| ID566208        |                      | 66,43684                                  | 70,99835   | 72,262655   | 110,14034  | 107,75277  | 108,84258  | 53,25413    | 44,29479    | 43,17347   | 58,47637  | 76,824515  | 72,902155  |
| ID3413662       |                      | 61,14072                                  | 61,311955  | 92,527435   | 97,088405  | 106,539315 | 161,80894  | 113,826695  | 123,18157   | 94,358985  | 98,38011  | 89,92003   | 78,789065  |
| ID238040        |                      | 135,10938                                 | 103,04067  | 121,85885   | 90,034475  | 84,95553   | 94,47865   | 182,057485  | 224,620965  | 193,870375 | 169,11635 | 163,69795  | 124,08009  |
| ID452           |                      | 90,838295                                 | 98,936525  | 91,923815   | 120,326445 | 121,12478  | 125,466415 | 39,40416    | 43,75539    | 39,041245  | 5,53274   | 70,184895  | 76,06747   |
| ID3761658       |                      | 107,14084                                 | 92,046145  | 64,70022    | 181,34114  | 154,72498  | 129,093815 | 24,09295    | 70,19384    | 41,492035  | 70,48171  | 69,97218   | 74,91209   |
| ID511           |                      | 105,71601                                 | 106,290995 | 112,84967   | 107,692465 | 125,45618  | 129,261625 | 71,69093    | 53,167045   | 65,11757   | 0         | 56,19328   | 56,580615  |
| ID3763684       |                      | 66,791745                                 | 72,039005  | 66,10342    | 77,44121   | 85,28793   | 106,839865 | 53,44554    | 69,298285   | 59,160035  | 65,37855  | 65,56417   | 65,429255  |
| ID1313          |                      | 101,828095                                | 118,00667  | 109,4203    | 200,61873  | 134,80007  | 123,741315 | 118,199565  | 153,501955  | 158,07491  | 23,59595  | 15,71686   | 1,878135   |
| ID3763682       |                      | 51,718405                                 | 72,0416    | 38,86039    | 92,06026   | 67,652735  | 103,21792  | 48,400835   | 44,39718    | 29,27014   | 118,89464 | 88,50082   | 81,036415  |

Table S-1

| ID <sup>1</sup> | Protein <sup>2</sup> | Median of normalized volumes <sup>3</sup> |            |            |            |            |             |            |             |            |           |            |            |
|-----------------|----------------------|-------------------------------------------|------------|------------|------------|------------|-------------|------------|-------------|------------|-----------|------------|------------|
|                 |                      | co_0 min                                  | co_30 min  | co_60 min  | co_24 h    | co_48 h    | co_72 h     | PI_0 min   | PI_30 min   | PI_60 min  | PI_24 h   | PI_48 h    | PI_72 h    |
| ID1457          |                      | 82,11244                                  | 87,443935  | 92,67744   | 90,649645  | 92,03233   | 100,04342   | 53,754745  | 56,009405   | 59,77399   | 61,7965   | 65,726295  | 69,874865  |
| ID1521          |                      | 78,772685                                 | 57,2443    | 88,52847   | 127,344035 | 125,26145  | 110,17496   | 20,70696   | 25,93722    | 38,783065  | 93,82919  | 95,11329   | 88,85915   |
| ID1840030       |                      | 144,24791                                 | 97,4895    | 150,85411  | 76,85299   | 70,354515  | 37,12203    | 180,95817  | 172,592765  | 196,66067  | 138,19548 | 170,853915 | 327,319515 |
| ID916           |                      | 131,39893                                 | 92,691115  | 109,62628  | 56,29047   | 49,77842   | 51,11882    | 256,647455 | 256,908525  | 237,760805 | 216,71157 | 183,29261  | 137,446095 |
| ID985           |                      | 94,46466                                  | 109,603655 | 115,89485  | 151,68825  | 162,96622  | 125,767375  | 52,909475  | 31,49838    | 43,9029    | 55,39831  | 79,76176   | 76,744205  |
| ID364919        |                      | 132,83325                                 | 150,24889  | 127,539705 | 107,08499  | 109,4364   | 117,152855  | 80,699915  | 122,080335  | 84,0183    | 77,13706  | 61,94457   | 56,250755  |
| ID1229          |                      | 116,88947                                 | 121,043725 | 106,542445 | 162,530685 | 145,11906  | 119,678305  | 116,354805 | 105,46715   | 108,51483  | 94,66388  | 102,52344  | 118,768065 |
| ID294218        |                      | 94,84608                                  | 103,090455 | 99,160245  | 106,631675 | 120,690475 | 89,33824    | 71,66933   | 75,745445   | 87,49138   | 73,03408  | 72,588115  | 73,12111   |
| ID1506          |                      | 127,599415                                | 141,14517  | 134,98471  | 141,40721  | 125,9372   | 118,96906   | 75,692585  | 96,503075   | 101,618645 | 91,75474  | 102,740445 | 115,57174  |
| ID1481          |                      | 75,611935                                 | 85,046405  | 77,288425  | 101,7385   | 91,950195  | 104,38641   | 48,611135  | 32,276925   | 60,815045  | 38,62833  | 89,549875  | 81,743945  |
| ID1655          |                      | 76,065175                                 | 74,614835  | 66,36098   | 184,705685 | 227,63113  | 148,247085  | 53,368675  | 55,205745   | 59,21392   | 363,04344 | 201,618145 | 152,96869  |
| ID66151         |                      | 25,69484                                  | 31,602605  | 39,318725  | 56,400905  | 72,92018   | 47,149505   | 29,24491   | 23,8187     | 26,644485  | 92,65449  | 100,445305 | 132,36153  |
| ID168476        |                      | 112,914925                                | 166,952335 | 169,08426  | 176,137685 | 165,47811  | 141,30391   | 68,8124    | 49,28527    | 73,34026   | 82,62124  | 70,560415  | 102,029775 |
| ID9044          |                      | 118,72223                                 | 98,36306   | 115,9029   | 79,914685  | 79,28156   | 90,946615   | 143,35212  | 164,874345  | 155,770205 | 154,20459 | 139,08662  | 102,05525  |
| ID2737054       |                      | 81,953845                                 | 77,09723   | 88,006105  | 124,67923  | 34,429245  | 135,628825  | 52,03087   | 16,79496    | 24,49336   | 3,40788   | 23,78227   | 17,48785   |
| ID24906         |                      | 108,27368                                 | 128,758695 | 114,28871  | 161,899015 | 130,67395  | 110,69691   | 26,860545  | 24,24073    | 5,63864    | 5,9796    | 72,3672    | 4,62173    |
| ID594301        |                      | 81,2547                                   | 91,487605  | 83,08087   | 100,025985 | 91,09497   | 86,964505   | 77,405645  | 61,690055   | 75,326765  | 178,93048 | 91,50274   | 95,14092   |
| ID3711681       |                      | 120,030335                                | 139,24256  | 122,21746  | 201,449025 | 138,902755 | 90,007925   | 92,38766   | 89,457095   | 82,539255  | 99,06952  | 78,392645  | 92,07796   |
| ID2201032       |                      | 86,44849                                  | 95,22476   | 90,745845  | 165,04647  | 601,728505 | 3213,762765 | 45,68449   | 25,116925   | 43,497755  | 1,65398   | 0          | 0          |
| ID35204         |                      | 83,840135                                 | 94,66872   | 84,420395  | 111,43024  | 106,967755 | 109,56515   | 75,063105  | 77,98403    | 89,564985  | 24,99451  | 84,985795  | 103,322425 |
| ID1366          |                      | 109,4484                                  | 130,333455 | 114,55823  | 135,90606  | 150,08756  | 138,627835  | 47,359685  | 23,714195   | 41,242445  | 43,82576  | 105,43213  | 132,43606  |
| ID731           |                      | 98,309985                                 | 86,042125  | 95,71367   | 104,549355 | 117,01693  | 99,91961    | 155,036985 | 243,931515  | 156,614205 | 165,28379 | 131,642545 | 44,92325   |
| ID3668269       |                      | 161,73751                                 | 172,663405 | 157,494885 | 64,10562   | 70,46584   | 89,38207    | 223,4139   | 194,67684   | 197,59984  | 37,20796  | 40,54024   | 30,673345  |
| ID2294          |                      | 85,466985                                 | 94,199075  | 78,742615  | 117,397395 | 104,6506   | 98,862315   | 68,996225  | 53,713605   | 69,55166   | 77,05297  | 82,669505  | 91,407985  |
| ID1750          |                      | 98,647565                                 | 98,535575  | 116,162475 | 77,637345  | 93,36606   | 91,75937    | 77,48461   | 70,214965   | 79,0953    | 69,4789   | 52,916465  | 52,84791   |
| ID74132         |                      | 91,97911                                  | 88,039095  | 122,93519  | 43,733525  | 72,423015  | 70,19386    | 104,242125 | 109,449765  | 118,70395  | 124,23703 | 69,396495  | 62,979525  |
| ID4476          |                      | 147,80489                                 | 151,971805 | 140,9886   | 155,0355   | 142,54781  | 137,482485  | 70,70755   | 64,91488    | 72,966425  | 89,33659  | 85,080375  | 87,369995  |
| ID593           |                      | 87,657275                                 | 89,189955  | 92,067365  | 116,27822  | 112,77129  | 121,006915  | 89,52552   | 92,06114    | 95,22314   | 84,63855  | 95,24483   | 89,90564   |
| ID1556          |                      | 272,20008                                 | 423,22454  | 660,714015 | 128,393505 | 100,73591  | 125,997635  | 278,829455 | 227,708105  | 192,008525 | 45,99612  | 75,283155  | 64,641195  |
| ID759           |                      | 151,200665                                | 103,36883  | 125,32549  | 60,29007   | 54,28573   | 56,87881    | 253,232255 | 273,060995  | 264,8523   | 209,04462 | 185,26306  | 137,04818  |
| ID1785527       |                      | 110,6467                                  | 116,59652  | 116,028205 | 159,376325 | 153,56118  | 144,99496   | 62,11275   | 83,67448    | 76,601775  | 0,59013   | 100,148325 | 10,59052   |
| ID185509        |                      | 88,56423                                  | 100,361785 | 89,153825  | 124,1525   | 114,82702  | 139,271695  | 159,823755 | 204,63616   | 162,63817  | 94,90073  | 80,52794   | 77,339235  |
| ID2005865       |                      | 129,546495                                | 147,541885 | 128,67454  | 112,26544  | 177,522675 | 128,947185  | 73,44448   | 69,944335   | 107,60402  | 77,02589  | 93,389595  | 116,142855 |
| ID1759          |                      | 89,285245                                 | 101,151835 | 97,09485   | 113,88103  | 100,65983  | 107,27651   | 72,35317   | 67,65373    | 65,16061   | 90,91395  | 83,98586   | 86,703835  |
| ID71445         |                      | 38,13437                                  | 50,87422   | 50,36578   | 54,12216   | 40,935835  | 45,874305   | 43,55021   | 57,303385   | 65,288405  | 210,01074 | 113,00752  | 126,826125 |
| ID1236          |                      | 2371,17663                                | n.d.       | 11231,5328 | 109,497575 | 197,85888  | 86,247695   | 2816,11016 | 28906,63011 | n.d.       | 116,4369  | 79,120625  | 131,93148  |
| ID406           |                      | 105,880965                                | 88,210605  | 102,08926  | 100,875905 | 80,05224   | 85,412685   | 138,12899  | 121,605145  | 130,92691  | 124,92737 | 125,26962  | 99,997145  |
| ID858           |                      | 126,535015                                | 95,952705  | 115,402665 | 68,711205  | 62,73355   | 60,739855   | 212,54911  | 247,74472   | 223,40364  | 185,2409  | 166,30984  | 124,110595 |
| ID1761          |                      | 34,41894                                  | 38,660525  | 52,130055  | 52,91507   | 58,27225   | 121,90206   | 46,47426   | 114,35039   | 54,07819   | 116,59343 | 72,36987   | 72,29631   |
| ID756           |                      | 134,3661                                  | 85,106795  | 131,16695  | 59,60169   | 55,62887   | 50,51894    | 249,000315 | 279,144975  | 261,20581  | 167,88395 | 159,713505 | 118,15554  |
| ID371           |                      | 90,57313                                  | 87,671105  | 88,78887   | 111,30061  | 105,691575 | 118,28221   | 79,99038   | 68,625305   | 69,8609    | 53,72891  | 81,6347    | 69,3212    |
| ID2102478       |                      | 97,95643                                  | 105,271905 | 100,237065 | 41,45628   | 110,88257  | 94,31956    | 78,433485  | 95,814345   | 97,346435  | 111,88615 | 60,11122   | 67,839535  |
| ID324496        |                      | 116,6636                                  | 107,825695 | 122,681665 | 127,94874  | 136,78097  | 116,010565  | 154,28502  | 125,28152   | 124,329305 | 89,10954  | 99,141075  | 93,2424    |
| ID246907        |                      | 101,80755                                 | 82,4137    | 97,55783   | 11,297955  | 75,01745   | 69,31852    | 104,178495 | 194,683475  | 74,08564   | 188,81791 | 200,864185 | 128,733385 |
| ID325           |                      | 100,32159                                 | 110,706495 | 98,999125  | 116,39557  | 108,024975 | 102,69863   | 98,510045  | 74,768415   | 101,096235 | 178,43926 | 98,957155  | 96,750125  |
| ID338842        |                      | 104,973885                                | 109,69146  | 108,051595 | 153,989435 | 152,61154  | 138,71074   | 111,84289  | 110,34964   | 96,464965  | 139,39997 | 147,239285 | 102,846355 |
| ID183880        |                      | 160,30871                                 | 181,892915 | 225,224125 | 133,69185  | 145,07476  | 134,614405  | 2,30492    | 5,161365    | 3,50311    | 58,89315  | 81,03488   | 85,097395  |
| ID1657          |                      | 447,729905                                | 270,407825 | 125,061855 | 142,13982  | 171,524645 | 96,679305   | 32,791195  | 27,76612    | 50,710685  | 42,44573  | 194,402595 | 17,518035  |
| ID1608          |                      | 67,14316                                  | 93,16734   | 96,608185  | 98,903925  | 90,67091   | 109,5135    | 90,027855  | 53,63402    | 62,85227   | 21,29585  | 66,006975  | 69,523345  |
| ID848           |                      | 112,91809                                 | 103,634815 | 111,719035 | 97,776385  | 94,68336   | 100,802705  | 122,798775 | 138,779775  | 130,897135 | 102,05145 | 98,45339   | 102,918325 |
| ID1197          |                      | 62,846075                                 | 70,33997   | 69,91661   | 125,66771  | 101,754255 | 119,34253   | 71,706     | 66,783575   | 62,39679   | 68,26144  | 80,28485   | 85,305055  |
| ID362785        |                      | 84,82085                                  | 95,28204   | 100,452355 | 150,2383   | 114,466575 | 126,07744   | 61,58533   | 51,394225   | 58,713965  | 91,68877  | 89,47785   | 94,603175  |
| ID1025          |                      | 137,864105                                | 150,46406  | 154,947345 | 130,385635 | 126,649185 | 71,883355   | 44,48427   | 67,032255   | 75,84382   | 86,61891  | 82,03333   | 73,086495  |
| ID240147        |                      | 100,9846                                  | 119,307615 | 103,39284  | 163,30904  | 142,029615 | 167,476005  | 68,385325  | 46,99953    | 47,96812   | 25,50962  | 51,959135  | 55,76686   |
| ID3761675       |                      | 114,666065                                | 114,818135 | 106,591675 | 136,148045 | 132,011475 | 119,12534   | 82,75516   | 95,53112    | 83,79276   | 77,77282  | 83,36393   | 80,78137   |
| ID1987569       |                      | 88,63417                                  | 61,63909   | 134,604595 | 329,03852  | 262,4465   | 127,147885  | 227,414125 | 451,547595  | 716,982825 | 95,86655  | 165,88026  | 457,409465 |
| ID567           |                      | 77,03523                                  | 86,073455  | 77,06341   | 96,30648   | 82,748825  | 100,156265  | 48,452225  | 56,3424     | 63,72085   | 86,8921   | 70,134415  | 85,793215  |

Table S-1

| ID <sup>1</sup> | Protein <sup>2</sup> | Median of normalized volumes <sup>3</sup> |            |            |            |            |            |             |             |             |           |            |            |
|-----------------|----------------------|-------------------------------------------|------------|------------|------------|------------|------------|-------------|-------------|-------------|-----------|------------|------------|
|                 |                      | co_0 min                                  | co_30 min  | co_60 min  | co_24 h    | co_48 h    | co_72 h    | PI_0 min    | PI_30 min   | PI_60 min   | PI_24 h   | PI_48 h    | PI_72 h    |
| ID2596060       |                      | 144,086855                                | 163,09586  | 120,92059  | 131,48389  | 110,54722  | 97,782795  | 147,28973   | 131,688835  | 140,568975  | 126,72762 | 123,672965 | 120,450805 |
| ID1193          |                      | 27,676625                                 | 31,214045  | 47,120505  | 69,34894   | 39,763505  | 35,284785  | 192,88311   | 64,67352    | 41,413235   | 15,32282  | 52,63813   | 63,85948   |
| ID11367         |                      | 97,683115                                 | 106,318325 | 98,680295  | 114,450265 | 133,933805 | 141,248975 | 93,92277    | 91,89896    | 96,9937     | 75,4953   | 78,2474    | 75,677715  |
| ID2214019       |                      | 104,05847                                 | 230,39511  | 133,69945  | 671,66564  | 904,18229  | 374,44238  | n.d.        | 78,63115    | 60676,90806 | 0         | 0          | 5,845585   |
| ID1615          |                      | 63,866605                                 | 141,70284  | 43,612345  | 238,782975 | 325,008515 | 105,365375 | 19,19186    | 6,66334     | 22,79773    | 9,96687   | 0,236425   | 7,27908    |
| ID1226          |                      | 98,35295                                  | 109,32747  | 100,2037   | 129,15973  | 106,25779  | 105,823735 | 78,594405   | 73,63852    | 76,96984    | 114,9303  | 92,7103    | 93,547685  |
| ID80360         |                      | 99,26888                                  | 118,28936  | 136,777435 | 135,790315 | 151,707285 | 160,265655 | 73,94719    | 78,11658    | 90,51091    | 62,28571  | 82,165265  | 98,940365  |
| ID732           |                      | 103,999095                                | 91,325465  | 92,778885  | 111,364485 | 114,5738   | 117,904395 | 158,85476   | 269,190515  | 176,42436   | 198,41249 | 154,16075  | 61,887075  |
| ID1475          |                      | 420,03199                                 | 280,86146  | 389,11258  | 123,206    | 175,804005 | 95,5199    | 973,016185  | 1000,327215 | 870,38995   | 192,20288 | 204,633405 | 151,83613  |
| ID1461          |                      | 74,18884                                  | 83,536855  | 79,380885  | 110,11706  | 96,959655  | 141,879345 | 69,401845   | 78,221085   | 82,26684    | 55,53976  | 95,275225  | 86,48192   |
| ID3597623       |                      | 114,299685                                | 130,480735 | 130,026985 | 148,9523   | 139,08746  | 127,90507  | 66,23536    | 80,32578    | 83,76695    | 126,02197 | 98,7583    | 122,949045 |
| ID119751        |                      | 98,26515                                  | 107,367935 | 85,9921    | 116,56803  | 114,94243  | 142,7545   | 58,467105   | 65,85379    | 51,305015   | 64,8809   | 68,88814   | 76,226135  |
| ID60178         |                      | 58,07145                                  | 64,811035  | 55,61444   | 129,09059  | 96,88239   | 109,58384  | 62,388175   | 46,95787    | 56,93862    | 99,27879  | 85,749285  | 95,552275  |
| ID1130          |                      | 481,25687                                 | 385,521875 | 800,591535 | 344,86526  | 437,93313  | 166,58528  | 159,315715  | 90,13392    | 49,732425   | 57,65972  | 120,745285 | 213,527145 |
| ID2838327       |                      | 151,878425                                | 165,71181  | 170,70167  | 178,234765 | 137,661235 | 110,78775  | 62,554265   | 61,88477    | 69,810045   | 104,80325 | 89,336035  | 101,714475 |
| ID27152         |                      | 108,59102                                 | 109,562405 | 142,90709  | 76,237655  | 104,68315  | 118,86967  | 87,83517    | 55,23929    | 81,874075   | 0         | 52,21811   | 47,42574   |
| ID2085530       |                      | 84,87864                                  | 92,397355  | 92,80298   | 128,09961  | 121,607265 | 164,20878  | 69,680905   | 34,752725   | 52,20244    | 29,89574  | 67,489605  | 48,60333   |
| ID1669          |                      | 112,02831                                 | 120,00794  | 130,740185 | 113,04134  | 123,598825 | 99,43038   | 65,156855   | 67,5415     | 84,302015   | 101,74027 | 92,294925  | 93,532125  |
| ID3403522       |                      | 97,10555                                  | 117,17602  | 119,557905 | 675,850135 | 89,377265  | 90,68382   | 426,510615  | 5054,344695 | 464,42233   | 127,69337 | 99,242505  | 99,90441   |
| ID1915149       |                      | 96,166535                                 | 62,914825  | 124,22338  | 163,9628   | 15,27455   | 102,908695 | 1433,553715 | 942,47299   | 1058,04259  | 70,74936  | 539,694515 | 139,30126  |
| ID1582          |                      | 85,2719                                   | 90,451795  | 64,39127   | 60,51584   | 54,293625  | 69,205735  | 50,903305   | 44,344135   | 62,858855   | 65,46446  | 97,66256   | 105,653615 |
| ID2555205       |                      | 118,36021                                 | 115,387035 | 186,967025 | 209,539855 | 400,1463   | 263,970735 | 80,53173    | 42,21012    | 71,147475   | 89,46959  | 104,191955 | 64,347015  |
| ID124300        |                      | 144,906115                                | 116,56102  | 145,7474   | 84,19133   | 90,723005  | 96,71828   | 204,130945  | 303,833845  | 221,0927    | 259,82439 | 225,95421  | 172,134135 |
| ID2723          |                      | 120,201155                                | 139,104225 | 130,256965 | 124,35953  | 115,835265 | 116,780545 | 69,050705   | 81,75841    | 87,24645    | 97,5881   | 88,639965  | 100,68902  |
| ID504850        |                      | 118,90933                                 | 128,954655 | 124,416245 | 119,51016  | 129,18007  | 119,600015 | 90,80264    | 99,80421    | 97,15779    | 114,99449 | 90,665815  | 85,647175  |
| ID1665          |                      | 128,08176                                 | 122,4768   | 168,127225 | 82,54846   | 83,423565  | 74,87669   | 94,308475   | 97,1834     | 91,383835   | 85,41282  | 63,595995  | 66,14709   |
| ID1228          |                      | 252,68093                                 | 255,561675 | 284,96908  | 116,49016  | 93,062835  | 74,327745  | 311,956285  | 177,009415  | 188,189495  | 131,17482 | 106,905635 | 125,12506  |
| ID457100        |                      | 86,267035                                 | 93,09254   | 91,61034   | 121,058405 | 119,578415 | 130,4324   | 82,9085     | 65,75439    | 69,434785   | 78,78106  | 77,254995  | 81,408985  |
| ID237648        |                      | 178,268415                                | 105,8965   | 158,496665 | 79,117015  | 62,05137   | 115,25775  | 307,205385  | 325,987715  | 275,216285  | 246,28031 | 196,220765 | 144,23486  |
| ID320752        |                      | 101,59175                                 | 102,89746  | 107,808025 | 128,35555  | 117,700965 | 108,41019  | 119,544885  | 95,01007    | 90,07537    | 75,64958  | 85,210785  | 84,11531   |
| ID1488          |                      | 96,401785                                 | 107,4578   | 107,16046  | 121,52182  | 109,64132  | 115,7314   | 65,20824    | 79,918535   | 78,72027    | 82,40175  | 99,519545  | 99,063965  |
| ID3763695       |                      | 16,540625                                 | 25,059895  | 10,267545  | 46,609045  | 33,511025  | 18,19321   | 91,1996     | 33,32465    | 98,710815   | 92,24176  | 47,603355  | 46,373325  |
| ID2286          |                      | 96,90995                                  | 105,68605  | 102,74102  | 115,22865  | 106,191655 | 102,646175 | 86,600615   | 78,28975    | 85,24105    | 98,63396  | 87,84947   | 92,361715  |
| ID114043        |                      | 104,746975                                | 124,78334  | 88,248445  | 110,971805 | 104,091275 | 139,288305 | 40,3165     | 43,846505   | 47,900185   | 36,95797  | 66,95763   | 75,380555  |
| ID1800806       |                      | 118,61783                                 | 115,405665 | 120,937675 | 158,148505 | 148,058195 | 114,3748   | 25,75982    | 353,10183   | 71,41217    | 0         | 0,88064    | 25,66809   |
| ID522           |                      | 109,69618                                 | 118,20915  | 119,50385  | 158,97095  | 163,827845 | 139,545975 | 45,30791    | 45,66676    | 55,242705   | 3,01244   | 34,27124   | 13,710195  |
| ID1260          |                      | 127,56261                                 | 61,54442   | 154,222455 | 135,30499  | 130,587405 | 138,875    | 127,49691   | 117,48538   | 111,984695  | 92,73742  | 89,842765  | 95,651815  |
| ID1048          |                      | 32,892305                                 | 42,8308    | 25,88817   | 111,000315 | 38,018805  | 97,505575  | 20,511425   | 20,85154    | 43,996885   | 18,33576  | 63,48758   | 49,53882   |
| ID1575          |                      | 114,05376                                 | 125,313195 | 125,329545 | 147,84669  | 116,2667   | 98,6336    | 84,26998    | 81,811205   | 88,809065   | 157,54345 | 121,715815 | 96,76976   |
| ID82135         |                      | 88,342695                                 | 102,083955 | 97,67905   | 150,71015  | 160,296485 | 120,282445 | 57,07427    | 52,99999    | 65,834435   | 115,82159 | 124,225155 | 135,63858  |
| ID8503          |                      | 65,4954                                   | 68,075475  | 74,164845  | 104,15178  | 98,339825  | 111,1898   | 56,41129    | 55,388875   | 48,31638    | 58,03264  | 63,041495  | 69,097035  |
| ID2315592       |                      | 81,65933                                  | 98,596955  | 89,86476   | 124,503965 | 99,12256   | 95,954285  | 93,513145   | 92,748435   | 86,277335   | 89,18351  | 89,227925  | 96,850945  |
| ID2072345       |                      | 77,491105                                 | 84,377335  | 74,946575  | 123,34206  | 119,995955 | 228,91364  | 60,992185   | 36,64791    | 35,30995    | 4,27317   | 51,928225  | 53,152295  |
| ID776           |                      | 109,213645                                | 67,714875  | 105,920285 | 46,400665  | 47,477815  | 47,27422   | 200,094295  | 262,826545  | 216,239395  | 223,60162 | 212,81634  | 163,5151   |
| ID444           |                      | 104,711555                                | 99,71068   | 106,689895 | 99,89583   | 101,85435  | 118,15932  | 102,522185  | 107,987005  | 103,06055   | 121,46846 | 125,035795 | 106,165665 |
| ID3761695       |                      | 11,679385                                 | 17,81424   | 10,66249   | 81,314565  | 40,020545  | 85,62982   | 41,80873    | 37,345845   | 48,792435   | 55,55077  | 56,584175  | 44,765195  |
| ID2330          |                      | 49,31228                                  | 52,645125  | 40,774395  | 102,49173  | 64,967325  | 98,43861   | 112,363815  | 114,48253   | 97,436565   | 83,25862  | 99,31982   | 161,236075 |
| ID2183          |                      | 132,986725                                | 97,552555  | 120,704065 | 69,277325  | 60,482585  | 58,783885  | 231,248095  | 259,91344   | 240,3311    | 173,76531 | 169,06966  | 127,68015  |
| ID2830369       |                      | 140,743335                                | 154,761755 | 142,85872  | 150,192855 | 125,194975 | 98,63802   | 80,144165   | 62,61218    | 80,873      | 102,86752 | 88,43157   | 94,10799   |
| ID1705          |                      | 154,25725                                 | 161,500885 | 157,233505 | 145,929875 | 143,178015 | 103,44416  | 119,78032   | 101,32146   | 121,388565  | 137,53088 | 183,43256  | 93,362615  |
| ID1571          |                      | 102,59895                                 | 116,29828  | 102,338565 | 138,80477  | 131,66483  | 126,76017  | 72,85282    | 69,731725   | 78,525785   | 84,40289  | 88,86066   | 85,659565  |
| ID43845         |                      | 102,70802                                 | 91,23302   | 96,361555  | 85,66004   | 90,87577   | 106,3902   | 153,567395  | 165,508645  | 168,509495  | 178,31559 | 104,222625 | 106,102855 |
| ID1983973       |                      | 148,64861                                 | 177,07821  | 164,387825 | 104,84455  | 130,66277  | 180,3859   | 168,710295  | 187,02289   | 222,25163   | 117,93709 | 97,72935   |            |
| ID1470          |                      | 124,512705                                | 103,516125 | 254,160785 | 172,31172  | 202,85783  | 188,223405 | 129,179835  | 195,042625  | 166,719865  | 23,65141  | 29,175065  | 13,14241   |
| ID186642        |                      | 68,982035                                 | 68,91716   | 57,28686   | 75,9829    | 83,368265  | 130,835005 | 60,328735   | 43,75006    | 50,05737    | 85,93743  | 67,20209   | 71,425285  |
| ID3761869       |                      | 81,159455                                 | 91,550315  | 70,737625  | 444,85219  | 227,02021  | 316,41022  | 90,348235   | 83,940795   | 101,977505  | 381,72711 | n.d.       | 176,00786  |
| ID1451          |                      | 68,0005                                   | 73,158915  | 99,20316   | 163,71689  | 150,54518  | 236,35589  | 71,92395    | 152,11063   | 111,90247   | 14,5049   | 55,522875  | 3,043525   |

Table S-1

| ID <sup>1</sup> | Protein <sup>2</sup> | Median of normalized volumes <sup>3</sup> |            |            |            |            |            |            |            |            |           |            |            |
|-----------------|----------------------|-------------------------------------------|------------|------------|------------|------------|------------|------------|------------|------------|-----------|------------|------------|
|                 |                      | co_0 min                                  | co_30 min  | co_60 min  | co_24 h    | co_48 h    | co_72 h    | PI_0 min   | PI_30 min  | PI_60 min  | PI_24 h   | PI_48 h    | PI_72 h    |
| ID262545        |                      | 120,275805                                | 132,477585 | 135,145465 | 96,9308    | 132,77885  | 93,56986   | 55,70883   | 37,779585  | 52,00463   | 59,20916  | 62,48303   | 61,21615   |
| ID1998321       |                      | 25,80449                                  | 26,951255  | 23,745655  | 93,502625  | 79,498425  | 109,60943  | 27,439045  | 16,24701   | 25,693285  | 29,04275  | 40,70773   | 33,41185   |
| ID2087348       |                      | 90,71811                                  | 103,44086  | 88,159365  | 111,624745 | 110,999395 | 78,154115  | 74,87742   | 70,24162   | 63,97605   | 25,73166  | 36,813355  | 45,876155  |
| ID639           |                      | 70,76658                                  | 79,0745    | 72,035095  | 125,57626  | 103,361065 | 100,890405 | 57,630015  | 59,176035  | 70,600665  | 89,40826  | 65,57534   | 82,908585  |
| ID2055531       |                      | 103,15029                                 | 110,16742  | 92,268045  | 159,08109  | 117,3333   | 123,02922  | 81,758995  | 66,86711   | 67,411365  | 155,41745 | 90,62614   | 78,04684   |
| ID268600        |                      | 25,788605                                 | 53,106695  | 46,097325  | 68,151945  | 42,27217   | 114,678415 | 150,693035 | 110,272215 | 198,23661  | 103,0694  | 46,372115  | 46,582045  |
| ID2083630       |                      | 94,84738                                  | 103,608265 | 101,125625 | 127,62404  | 133,255    | 157,43235  | 72,24056   | 55,381595  | 58,42789   | 23,23333  | 61,766895  | 53,474475  |
| ID45562         |                      | 123,83111                                 | 110,120575 | 121,67839  | 100,522435 | 92,323825  | 109,16747  | 184,117445 | 166,786035 | 162,1099   | 129,06183 | 131,793005 | 118,03617  |
| ID1792282       |                      | 115,913205                                | 123,50017  | 125,431305 | 143,381095 | 144,1363   | 131,58238  | 64,0738    | 81,47582   | 78,73008   | 37,12842  | 51,034465  | 36,53574   |
| ID2318312       |                      | 87,24116                                  | 100,618205 | 67,07718   | 113,561    | 136,13482  | 237,274035 | 44,2854    | 82,616545  | 78,99709   | 89,88915  | 84,79872   | 91,244545  |
| ID2880272       |                      | 58,40824                                  | 75,221     | 62,99453   | 68,28188   | 86,056655  | 134,38691  | 195,568385 | 148,517725 | 163,575985 | 116,48816 | 75,620975  | 54,391735  |
| ID3759858       |                      | 90,697745                                 | 109,1491   | 75,325655  | 210,020325 | 285,360295 | 257,468465 | 72,32739   | 62,05013   | 75,15501   | 247,14215 | 44,35676   | 89,735715  |
| ID769           |                      | 143,47688                                 | 94,091295  | 140,01839  | 58,254465  | 53,305995  | 52,214925  | 247,042675 | 267,912925 | 258,182085 | 219,28288 | 193,701365 | 143,952785 |
| ID221306        |                      | 86,04593                                  | 111,068915 | 102,32477  | 106,16241  | 104,331025 | 95,06027   | 50,050165  | 79,25187   | 61,9731    | 120,06056 | 70,59148   | 71,787845  |
| ID401246        |                      | 103,324005                                | 94,8642    | 106,92369  | 84,16179   | 62,354075  | 97,774135  | 100,781845 | 92,598975  | 129,28455  | 141,32418 | 97,372035  | 81,553365  |
| ID57056         |                      | 61,526995                                 | 70,66825   | 62,27633   | 89,84065   | 86,833895  | 79,695075  | 47,840085  | 39,128575  | 51,34106   | 62,4531   | 67,25757   | 70,352355  |
| ID394           |                      | 114,845525                                | 94,332575  | 117,698695 | 74,86347   | 80,102285  | 97,668195  | 161,383285 | 190,13609  | 186,740585 | 157,16816 | 139,740735 | 111,314575 |
| ID2437          |                      | 40,504315                                 | 45,75968   | 48,386575  | 125,141295 | 125,57898  | 131,379555 | 55,438965  | 36,8967    | 98,43516   | 56,76696  | 77,46198   | 77,65944   |
| ID444662        |                      | 175,3716                                  | 179,63045  | 192,50107  | 153,703895 | 142,32495  | 115,32567  | 189,40868  | 180,41095  | 190,31474  | 543,56248 | 201,10852  | 217,481395 |
| ID154183        |                      | 91,095155                                 | 108,21531  | 101,21722  | 120,410615 | 135,29746  | 149,64882  | 50,75459   | 66,726815  | 64,60876   | 98,26682  | 119,145435 | 115,957305 |
| ID1452          |                      | 77,85469                                  | 89,75318   | 98,63359   | 109,00543  | 109,433975 | 109,970875 | 65,377735  | 65,871045  | 73,868515  | 89,81063  | 86,175335  | 86,70703   |
| ID1600          |                      | 130,1019                                  | 140,47274  | 164,8684   | 128,488195 | 103,402055 | 85,688355  | 132,28032  | 204,18777  | 173,61803  | 82,12549  | 66,468975  | 78,91421   |
| ID218682        |                      | 199,436875                                | 212,762925 | 216,780795 | 162,17101  | 144,53205  | 161,71811  | 123,34514  | 93,86857   | 151,62269  | 78,54983  | 87,624695  | 85,478435  |
| ID1866181       |                      | 1513,53796                                | 243,584425 | 111,47018  | 108,253365 | 1286,13716 | 156,813155 | 90,01925   | 185,85337  | 109,764395 | 41,04196  | 53,571495  | 0,01137    |
| ID392           |                      | 122,502435                                | 101,912625 | 120,408565 | 87,60091   | 85,395965  | 103,211495 | 158,966315 | 184,52941  | 183,83564  | 161,78633 | 140,721895 | 107,104625 |
| ID1654          |                      | 102,53134                                 | 104,54464  | 108,586305 | 201,46277  | 205,962685 | 200,34818  | 130,086925 | 123,0941   | 134,57522  | 106,88181 | 162,0932   | 155,95723  |
| ID2917416       |                      | 128,476125                                | 127,362565 | 138,17908  | 180,57991  | 169,44718  | 143,741275 | 28,675085  | 19,29086   | 31,922765  | 59,25728  | 151,905365 | 155,069485 |
| ID149908        |                      | 84,385765                                 | 94,889385  | 85,620765  | 107,431695 | 96,60769   | 107,999575 | 61,84535   | 60,730775  | 69,77199   | 72,67831  | 76,17095   | 81,6       |
| ID2204207       |                      | 127,903415                                | 158,32853  | 162,71055  | 258,340155 | 653,97441  | 123,60653  | 68,67375   | 53,859125  | 66,151335  | 46,42129  | 1642,25764 | 71,655545  |
| ID2068313       |                      | 71,21509                                  | 73,88052   | 64,49273   | 116,893585 | 127,741025 | 154,364635 | 52,9749    | 28,671515  | 35,221845  | 25,89099  | 50,44453   | 52,5218    |
| ID315205        |                      | 83,4516                                   | 75,281865  | 77,91438   | 111,56854  | 123,19847  | 103,77212  | 72,864835  | 54,293115  | 61,15976   | 71,62785  | 75,41248   | 74,019635  |
| ID2912567       |                      | 92,84593                                  | 133,77259  | 118,840075 | 104,879095 | 124,51268  | 101,74395  | 21,8069    | n.d.       | n.d.       | 100,96616 | 128,85948  | 162,832495 |
| ID1867746       |                      | 105,01289                                 | 94,627525  | 119,83265  | 80,47935   | 62,141175  | 54,15455   | 107,573115 | 178,19904  | 114,077395 | 76,44881  | 175,40296  | 86,962865  |
| ID1677          |                      | 77,132035                                 | 95,89571   | 70,15815   | 112,98754  | 66,591985  | 86,599265  | 56,66474   | 0,15108    | 37,39739   | 526,86271 | 278,61625  | 260,84683  |
| ID398           |                      | 109,04361                                 | 112,29329  | 105,494985 | 131,25197  | 141,707835 | 146,71037  | 71,197755  | 63,0649    | 66,222535  | 76,86574  | 86,203435  | 85,11999   |
| ID290046        |                      | 72,643875                                 | 88,32034   | 73,130245  | 99,9602    | 94,051045  | 129,349355 | 109,59784  | 82,54667   | 77,296935  | 67,57772  | 105,30636  | 86,98285   |
| ID996           |                      | 60,14356                                  | 253,9599   | 78,74742   | 152,14776  | 220,037025 | 92,15265   | 118,45779  | 277,887995 | 180,82246  | 108,36936 | 102,87172  | 67,68099   |
| ID3549612       |                      | 97,163235                                 | 50,32229   | 79,239535  | 44,26357   | 52,1301    | 40,998365  | 263,82021  | 260,55422  | 244,047815 | 214,25201 | 213,306225 | 150,676215 |
| ID2152149       |                      | 77,80457                                  | 95,713685  | 75,80472   | 94,247825  | 97,387315  | 98,967215  | 121,13864  | 108,806385 | 111,90979  | 82,92413  | 90,690455  | 70,584965  |
| ID327           |                      | 99,845455                                 | 98,905095  | 100,59717  | 109,30698  | 102,15758  | 93,16255   | 111,61762  | 118,826075 | 100,03491  | 91,09022  | 99,689205  | 78,223625  |
| ID1006          |                      | 138,98092                                 | 318,41288  | 635,591275 | 397,225455 | 256,742845 | 137,302    | 62,23049   | 78,16834   | 43,101675  | 79,66433  | 100,677045 | 90,6779    |
| ID232052        |                      | 82,46885                                  | 70,66001   | 118,75207  | 70,6255    | 69,53761   | 48,23947   | 61,353365  | 3,2915     | 36,62968   | 95,11417  | 61,003845  | 45,11657   |
| ID1574          |                      | 232,724165                                | 558,08563  | 1323,27202 | 37,395415  | 51,830215  | 48,4013    | 203,6002   | 351,59485  | 195,902265 | 20,25749  | 43,780635  | 84,17945   |
| ID3763685       |                      | 116,98944                                 | 108,31744  | 108,272715 | 137,00574  | 127,10337  | 83,10986   | 64,992205  | 86,23563   | 74,998785  | 97,73169  | 97,41028   | 94,543485  |
| ID2093028       |                      | 112,33839                                 | 117,551005 | 109,26759  | 106,7142   | 99,35778   | 56,257045  | 133,094835 | 127,222215 | 143,577475 | 111,34738 | 124,02691  | 72,837125  |
| ID3464756       |                      | 108,431405                                | 117,47771  | 118,387215 | 89,63558   | 90,58471   | 51,10978   | 35,921915  | 0,513615   | 30,297725  | 28,80509  | 42,89911   | 68,07995   |
| ID2997219       |                      | 75,950625                                 | 76,91129   | 75,444595  | 87,67679   | 40,234725  | 37,731975  | 103,103325 | 164,254695 | 119,50514  | 46,76985  | 42,561695  | 26,290005  |
| ID1716          |                      | 59,211235                                 | 76,67799   | 68,630355  | 115,68466  | 114,22531  | 140,898675 | 57,57923   | 42,368145  | 55,24772   | 53,10884  | 77,97805   | 129,687855 |
| ID523           |                      | 115,7831                                  | 127,564535 | 111,532165 | 143,875625 | 124,38857  | 156,12105  | 85,811495  | 97,220895  | 78,76842   | 95,08377  | 79,180405  | 81,472525  |
| ID775           |                      | 126,574805                                | 96,204105  | 122,450375 | 68,067835  | 71,479065  | 73,13959   | 186,080175 | 233,732205 | 175,95547  | 191,76918 | 171,13654  | 137,69205  |
| ID350           |                      | 89,34717                                  | 100,51646  | 90,639005  | 113,598005 | 117,298615 | 132,311075 | 76,08007   | 58,6121    | 61,937565  | 45,78811  | 65,179125  | 74,867995  |
| ID3762281       |                      | 133,891405                                | 109,75618  | 124,77668  | 118,88022  | 105,844635 | 90,576955  | 151,00581  | 143,902185 | 159,73642  | 144,1955  | 118,364695 | 91,84111   |
| ID463195        |                      | 81,328945                                 | 88,248745  | 80,890565  | 113,99908  | 146,89869  | 135,799015 | 60,81427   | 48,98784   | 55,77702   | 4,83931   | 60,84448   | 68,665405  |
| ID829           |                      | 130,793375                                | 149,52392  | 162,05109  | 136,086775 | 126,828875 | 177,45068  | 93,4883    | 105,306025 | 113,404155 | 120,37455 | 168,33673  | 129,243985 |
| ID3261240       |                      | 92,67639                                  | 103,85793  | 99,69121   | 121,43431  | 126,537865 | 132,77209  | 87,865575  | 90,50975   | 95,85824   | 66,00233  | 90,29572   | 87,242905  |
| ID587           |                      | 9,545935                                  | 10,0167    | 9,52973    | 29,34899   | 5,78262    | 80,67157   | 45,366735  | 46,78073   | 76,06348   | 61,81966  | 31,52208   | 49,42629   |
| ID193389        |                      | 60,539565                                 | 67,14238   | 55,58614   | 86,87066   | 89,311945  | 110,51362  | 89,347095  | 70,18502   | 82,493455  | 109,30981 | 82,755875  | 72,199885  |

Table S-1

| ID <sup>1</sup> | Protein <sup>2</sup> | Median of normalized volumes <sup>3</sup> |            |            |            |            |            |             |             |            |           |            |            |
|-----------------|----------------------|-------------------------------------------|------------|------------|------------|------------|------------|-------------|-------------|------------|-----------|------------|------------|
|                 |                      | co_0 min                                  | co_30 min  | co_60 min  | co_24 h    | co_48 h    | co_72 h    | PI_0 min    | PI_30 min   | PI_60 min  | PI_24 h   | PI_48 h    | PI_72 h    |
| ID307           |                      | 109,12255                                 | 107,08312  | 116,47629  | 233,956665 | 217,82503  | 119,24964  | 201,66453   | 146,32415   | 0          | 0         | 132,42756  | 37,47676   |
| ID785           |                      | 152,06667                                 | 100,98235  | 124,24116  | 55,97038   | 48,22547   | 52,77446   | 291,303975  | 298,33929   | 291,682895 | 211,67535 | 184,2662   | 134,60489  |
| ID1105          |                      | 123,280205                                | 135,36302  | 125,41825  | 135,456675 | 146,2113   | 156,961005 | 37,057635   | 31,45618    | 51,52819   | 56,6596   | 89,723935  | 97,113865  |
| ID2990527       |                      | 235,20914                                 | 317,94567  | 196,16416  | 593,434585 | 380,66968  | 151,32295  | 346,82253   | 565,977     | 308,184275 | 0,37601   | 0,01906    | 0          |
| ID240305        |                      | 93,002405                                 | 109,19972  | 98,051975  | 146,76277  | 133,59583  | 135,64771  | 66,79451    | 50,0941     | 52,16943   | 24,55377  | 55,859725  | 58,209445  |
| ID3259231       |                      | 82,34446                                  | 90,16495   | 93,887395  | 98,11176   | 89,617995  | 92,790975  | 102,319075  | 102,133295  | 98,98266   | 72,06532  | 83,615035  | 86,53472   |
| ID1814025       |                      | 131,66847                                 | 124,093595 | 134,90647  | 243,214375 | 130,224115 | 122,066795 | 13149,26365 | 1117,053705 | 455,22864  | 804,48277 | 0          | 46,340435  |
| ID2350362       |                      | 77,612655                                 | 88,98751   | 79,176115  | 78,624575  | 93,17361   | 148,65775  | 75,75814    | 81,072595   | 78,55007   | 96,5064   | 68,61901   | 81,17721   |
| ID2028269       |                      | 74,199685                                 | 119,63748  | 69,84251   | 150,64091  | 93,867925  | 155,04361  | 21,233075   | 53,29015    | 45,83941   | 30,20786  | 39,64912   | 55,433205  |
| ID2074209       |                      | 97,8073                                   | 95,60887   | 102,442755 | 97,53061   | 100,95785  | 87,28879   | 121,25296   | 138,818675  | 115,72855  | 113,62947 | 101,64051  | 69,151325  |
| ID1772          |                      | 110,58201                                 | 127,47369  | 118,91154  | 118,783305 | 104,57731  | 97,150305  | 76,394975   | 72,45461    | 80,879225  | 110,92348 | 91,014705  | 94,810595  |
| ID2218268       |                      | 133,43701                                 | 145,631565 | 133,03421  | 294,73722  | 721,17673  | 63,909935  | 62,06691    | 68,583935   | 83,170635  | 0,30577   | 0          | 0,005025   |
| ID4923          |                      | 95,828875                                 | 107,069465 | 85,724525  | 136,404435 | 152,43765  | 136,223425 | 99,928435   | 58,595595   | 68,177025  | 63,64655  | 89,8759    | 82,76708   |
| ID2033833       |                      | 15,86412                                  | 8,03953    | 14,534715  | 31,412905  | 16,37726   | 41,56826   | 30,260985   | 19,189685   | 27,68712   | 70,08033  | 38,69845   | 25,11885   |
| ID2037342       |                      | 19,10624                                  | 16,782005  | 28,22797   | 50,717915  | 38,00465   | 124,98411  | 29,279425   | 30,86486    | 37,327755  | 53,79424  | 42,33107   | 57,72252   |
| ID754           |                      | 138,31833                                 | 83,573755  | 137,9919   | 58,049535  | 54,115015  | 41,44375   | 278,72857   | 328,273855  | 297,183415 | 179,3574  | 169,683595 | 121,14855  |
| ID1026          |                      | 92,40956                                  | 133,06908  | 98,033925  | 186,55443  | 187,784405 | 164,453765 | 140,862475  | 161,13155   | 164,355525 | 76,34495  | 61,66745   | 41,774035  |
| ID210320        |                      | 117,844005                                | 124,957545 | 123,27741  | 102,69081  | 88,643415  | 99,091045  | 84,90953    | 78,98358    | 76,059695  | 78,79659  | 59,163375  | 67,262405  |
| ID652           |                      | 53,842075                                 | 55,62667   | 51,8136    | 86,15588   | 70,25813   | 74,371215  | 48,44822    | 44,058025   | 49,635835  | 90,60236  | 61,408955  | 77,084215  |
| ID1843456       |                      | 124,42194                                 | 87,247535  | 131,660115 | 248,171125 | 95,976015  | 18,118615  | 288,2531    | 246,602615  | 274,708765 | 89,3415   | 170,546785 | 145,04268  |
| ID1564          |                      | 115,89132                                 | 104,349165 | 582,758945 | 188,263395 | 204,570315 | 551,01865  | 32,814535   | 109,512485  | 99,837945  | 22,95144  | 50,6499    | 53,509835  |
| ID413           |                      | 143,076695                                | 94,457045  | 136,12456  | 68,473725  | 61,97      | 65,117285  | 235,74247   | 243,26392   | 235,76106  | 207,8227  | 192,801815 | 109,051755 |
| ID3040913       |                      | 148,03133                                 | 142,40065  | 221,93033  | 118,187155 | 88,294475  | 20,27903   | 119,091095  | 123,02193   | 113,09136  | 73,47756  | 69,360105  | 63,111455  |
| ID136093        |                      | 77,59455                                  | 82,80186   | 81,88253   | 102,686505 | 91,5343    | 101,072045 | 55,230125   | 44,960795   | 45,33363   | 72,34207  | 64,81154   | 84,016005  |
| ID2057395       |                      | 111,542195                                | 115,57679  | 99,52309   | 154,124325 | 143,52624  | 202,46863  | 74,291185   | 66,55675    | 63,917735  | 101,48805 | 81,99594   | 83,51848   |
| ID2062951       |                      | 91,19294                                  | 97,31949   | 85,18465   | 180,13894  | 156,49485  | 217,018005 | 48,06276    | 33,720955   | 42,74015   | 23,87556  | 36,97325   | 37,316175  |
| ID438739        |                      | 38,464565                                 | 51,908405  | 35,071165  | 60,449775  | 51,936885  | 83,76843   | 34,38723    | 44,037405   | 39,589835  | 47,13885  | 49,7032    | 50,738515  |
| ID578           |                      | 114,516405                                | 110,516015 | 129,056265 | 109,11656  | 144,87778  | 137,560305 | 291,481105  | 352,330475  | 392,974145 | 111,71082 | 117,877835 | 99,32337   |
| ID25932         |                      | 97,35746                                  | 99,559625  | 88,305265  | 184,485235 | 169,05112  | 121,72292  | 27,65185    | 16,85235    | 24,835555  | 26,06764  | 44,90586   | 43,261     |
| ID2105992       |                      | 100,019025                                | 107,514035 | 95,54478   | 130,28088  | 128,04316  | 151,79092  | 53,951755   | 29,692375   | 38,33108   | 18,78976  | 28,368525  | 35,53487   |
| ID1804168       |                      | 28,479055                                 | 33,84209   | 40,338515  | 22,34771   | 15,17307   | 19,95668   | 804,99368   | 0           | n.d.       | 41,80688  | 35,451385  | 62,517155  |
| ID2202941       |                      | 12,23298                                  | 15,9992    | 10,03883   | 63,04164   | 40,63658   | 50,724345  | 98,764585   | 93,583935   | 99,7761    | 29,47598  | 49,776145  | 24,388085  |
| ID1793947       |                      | 101,54421                                 | 114,11316  | 115,4886   | 149,03885  | 124,81562  | 133,93915  | 59,04356    | 92,68904    | 86,08973   | 74,38409  | 84,313235  | 70,910515  |
| ID3763473       |                      | 35,72331                                  | 28,81882   | 52,878535  | 128,218865 | 149,66035  | 149,39231  | 96,649175   | 493,673825  | 196,51612  | 77,02407  | 219,96305  | 157,505175 |
| ID470           |                      | 60,91154                                  | 76,85696   | 57,84029   | 100,93871  | 109,40541  | 136,514065 | 48,820245   | 59,91333    | 52,90483   | 86,3767   | 91,445155  | 83,22858   |
| ID1411          |                      | 65,276685                                 | 66,64628   | 71,175705  | 81,260355  | 95,861015  | 104,88904  | 57,250405   | 48,05211    | 59,14893   | 78,24356  | 77,2931    | 76,10549   |
| ID1532          |                      | 531,73463                                 | 283,129805 | 652,35658  | 190,633535 | 158,351525 | 829,28714  | 476,724135  | 597,075465  | 536,92003  | 10,30956  | 60,322435  | 63,71678   |
| ID963           |                      | 73,735185                                 | 81,380905  | 73,425435  | 76,81312   | 85,821975  | 99,91754   | 78,41656    | 74,681365   | 79,862455  | 87,37791  | 76,49249   | 81,307875  |
| ID1819121       |                      | 129,330485                                | 115,99883  | 129,19581  | 108,246295 | 61,88556   | 106,447635 | 126,790615  | 125,044075  | 149,80069  | 280,99527 | 93,8817    | 83,06582   |
| ID7425          |                      | 106,744605                                | 84,757555  | 106,72511  | 80,83984   | 64,744515  | 94,55462   | 193,34158   | 227,45984   | 190,61004  | 157,19446 | 136,005785 | 105,7358   |
| ID36784         |                      | 109,1476                                  | 122,86271  | 108,110275 | 147,86142  | 142,40074  | 135,934055 | 44,375665   | 29,178465   | 15,572425  | 1,7262    | 65,687915  | 70,40649   |
| ID2091139       |                      | 113,45493                                 | 117,6113   | 108,51645  | 107,92336  | 98,11152   | 37,310335  | 129,34547   | 141,680025  | 134,284695 | 68,1097   | 93,202585  | 62,34366   |
| ID1735          |                      | 112,947465                                | 125,95077  | 140,216715 | 137,63251  | 150,83428  | 132,576855 | 97,15208    | 97,487715   | 96,46718   | 97,83675  | 119,81013  | 127,870375 |
| ID2076081       |                      | 96,808085                                 | 92,51319   | 97,2917    | 95,698065  | 97,64192   | 63,35633   | 115,87363   | 137,46666   | 111,030575 | 110,2173  | 96,21255   | 80,26701   |
| ID2190755       |                      | 120,26998                                 | 137,988005 | 125,33933  | 216,456295 | 269,917665 | 176,525735 | 42,64605    | 59,98982    | 58,41406   | 56,88017  | 37,743835  | 52,36504   |
| ID866           |                      | 108,8792                                  | 74,033445  | 153,19624  | 78,482505  | 74,77579   | 82,985145  | 227,15109   | 211,505855  | 299,775075 | 37,90569  | 126,544755 | 134,41384  |
| ID121837        |                      | 50,6045                                   | 72,5239    | 45,29254   | 82,422295  | 50,163365  | 88,111555  | 65,18407    | 58,396375   | 69,64329   | 50,86741  | 63,78509   | 52,87719   |
| ID352           |                      | 106,69928                                 | 95,194945  | 85,1333    | 125,250635 | 125,743765 | 132,015745 | 53,85699    | 24,8213     | 33,500085  | 6,56977   | 39,561005  | 48,483145  |
| ID2158110       |                      | 91,39396                                  | 176,76618  | 78,23103   | 119,903845 | 134,140415 | 110,86878  | 333,665945  | 636,721995  | 764,0856   | 134,22708 | 115,12845  | 91,763     |
| ID1566          |                      | 177,413945                                | 102,47751  | 106,731185 | 97,108745  | 81,02185   | 101,748805 | 248,67079   | 269,15515   | 280,516515 | 99,79044  | 151,62601  | 136,00911  |
| ID23159         |                      | 112,827115                                | 116,91289  | 112,00595  | 132,85799  | 137,182865 | 106,36441  | 94,41178    | 69,75188    | 72,740085  | 120,28582 | 88,18255   | 80,09076   |
| ID1201          |                      | 89,929215                                 | 100,789525 | 96,861865  | 117,38972  | 94,02247   | 92,51971   | 105,62123   | 91,76657    | 82,50958   | 91,71055  | 84,00173   | 89,003695  |
| ID524           |                      | 83,297635                                 | 96,64711   | 88,51272   | 153,371075 | 143,726395 | 158,34949  | 56,779395   | 36,890865   | 55,37097   | 56,096775 | 62,59764   | 62,59764   |
| ID1223          |                      | 139,066785                                | 140,14658  | 127,080355 | 133,627715 | 43,193235  | 96,643035  | 26,64868    | 21,854      | 16,13246   | 119,7571  | 28,896655  | 107,5582   |
| ID2275539       |                      | 91,448515                                 | 98,13711   | 102,615185 | 133,507875 | 117,224615 | 116,716785 | 55,118235   | 54,337705   | 74,40083   | 0,044815  | 83,39352   | 65,848565  |
| ID2044505       |                      | 127,80591                                 | 127,971805 | 114,024195 | 161,685675 | 193,20099  | 187,10851  | 80,52602    | 59,73165    | 75,0134    | 43,2009   | 92,72295   | 81,608285  |
| ID719           |                      | 158,45342                                 | 107,14153  | 167,43135  | 75,72458   | 82,701565  | 57,776395  | 279,98584   | 320,663585  | 303,310345 | 190,23729 | 176,885045 | 138,590355 |

Table S-1

| ID <sup>1</sup> | Protein <sup>2</sup> | Median of normalized volumes <sup>3</sup> |             |            |            |            |            |             |             |            |           |            |            |
|-----------------|----------------------|-------------------------------------------|-------------|------------|------------|------------|------------|-------------|-------------|------------|-----------|------------|------------|
|                 |                      | co_0 min                                  | co_30 min   | co_60 min  | co_24 h    | co_48 h    | co_72 h    | PI_0 min    | PI_30 min   | PI_60 min  | PI_24 h   | PI_48 h    | PI_72 h    |
| ID1621          |                      | 80,87756                                  | 90,22589    | 78,998075  | 165,868695 | 122,342075 | 108,431975 | 32,44845    | 30,350645   | 41,615715  | 101,42878 | 52,08398   | 73,629865  |
| ID3068832       |                      | 95,88613                                  | 124,166965  | 113,658075 | 130,792485 | 103,008205 | 108,04957  | 78,51962    | 77,699955   | 77,288245  | 87,409035 | 91,18206   |            |
| ID440482        |                      | 87,90174                                  | 101,7526    | 98,55691   | 147,93132  | 153,817405 | 177,85072  | 69,421745   | 63,56926    | 70,654455  | 86,04113  | 315,94577  | 313,395625 |
| ID1623          |                      | 4869,76974                                | 3596,095125 | 179,96693  | 201,541225 | 582,671    | 103,59811  | 8535,981155 | 66317,59775 | 894,55784  | 6,91064   | 56,767295  | 56,11012   |
| ID2064822       |                      | 83,73835                                  | 85,87047    | 81,17295   | 158,189925 | 134,546335 | 144,23538  | 40,15303    | 33,764495   | 35,825535  | 59,85732  | 43,08702   | 46,94949   |
| ID1059          |                      | 83,530105                                 | 92,5088     | 90,766225  | 92,12436   | 119,327115 | 134,98056  | 106,030705  | 112,97221   | 129,15127  | 103,96222 | 46,92663   | 43,97593   |
| ID5273          |                      | 50,91426                                  | 51,71629    | 52,218555  | 110,26471  | 86,77814   | 122,35192  | 31,538365   | 20,069065   | 25,88078   | 51,61702  | 70,18779   | 72,983235  |
| ID1085          |                      | 109,79544                                 | 423,744     | 257,064505 | 846,601775 | 2335,97252 | 378,98688  | 50,008635   | 136,64122   | 86,91391   | 8,76387   | 0          | 5,52146    |
| ID2040831       |                      | 95,28774                                  | 106,8871    | 93,27085   | 119,8782   | 113,479305 | 144,73616  | 90,77197    | 69,165645   | 85,90493   | 53,54666  | 96,50449   | 80,51717   |
| ID2977290       |                      | 218,640315                                | 372,556525  | 101,232365 | 193,30513  | 98,795075  | 113,37783  | 4,72551     | 3,6414      | 31,26637   | 59,60785  | 47,18274   | 34,024465  |
| ID41789         |                      | 124,773025                                | 84,95761    | 126,11684  | 63,76998   | 77,062445  | 118,019765 | 190,989195  | 210,653645  | 217,13034  | 148,72614 | 146,22075  | 115,71979  |
| ID3091679       |                      | 2,348455                                  | 5,276395    | 20,64808   | 52,248815  | 53,95996   | 79,984825  | 31,045795   | 24,09118    | 20,481415  | 107,12254 | 52,54347   | 51,409895  |
| ID1394          |                      | 65,10797                                  | 70,434755   | 71,564145  | 89,06197   | 94,08462   | 102,505645 | 35,763095   | 41,309045   | 48,607035  | 140,72042 | 87,785555  | 88,5143    |
| ID1028          |                      | 521,53415                                 | 278,731385  | 229,39805  | 81,402155  | 125,094615 | 63,29319   | 282,313435  | 295,5869    | 277,38822  | 115,3824  | 145,45026  | 69,89416   |
| ID140457        |                      | 42,965135                                 | 8,014975    | 48,346685  | 173,698205 | 212,362645 | 131,687475 | 250,569075  | 225,96191   | 182,418715 | 104,63099 | 125,7767   | 92,27382   |
| ID3616          |                      | 93,956875                                 | 94,845985   | 94,43191   | 96,144385  | 100,6173   | 106,818415 | 108,14198   | 116,88895   | 109,784545 | 131,38085 | 112,38007  | 99,71805   |
| ID2290995       |                      | 139,367525                                | 147,28836   | 118,410085 | 140,06255  | 149,375905 | 112,38135  | 66,943345   | 78,807555   | 68,275855  | 83,77681  | 10,24136   | 3,456835   |
| ID2970570       |                      | 99,955475                                 | 108,4887    | 100,911265 | 106,339725 | 121,019625 | 121,076765 | 124,51661   | 86,308665   | 76,56317   | 119,69719 | 118,50786  | 96,702845  |
| ID2039001       |                      | 87,204105                                 | 97,09223    | 87,01725   | 115,523215 | 100,059355 | 126,22123  | 90,656405   | 66,610915   | 84,085375  | 73,0962   | 101,313775 | 84,59334   |
| ID2096810       |                      | 118,6478                                  | 118,22398   | 108,71145  | 114,385795 | 105,754105 | 55,259355  | 119,836125  | 129,57646   | 111,9153   | 135,86864 | 86,18827   | 69,89709   |
| ID68693         |                      | 66,41294                                  | 69,299185   | 72,90697   | 89,973475  | 91,94017   | 69,60692   | 57,89282    | 50,40004    | 58,102695  | 83,01442  | 69,868105  | 74,619235  |
| ID1719          |                      | 50,03129                                  | 58,66594    | 82,81132   | 67,74883   | 62,874195  | 94,32901   | 125,874655  | 447,41827   | 188,923935 | 50,95042  | 60,776155  | 61,123985  |
| ID421481        |                      | 166,07288                                 | 140,37075   | 193,901695 | 95,181045  | 133,887305 | 147,788235 | 90,801235   | 112,607825  | 96,317775  | 95,49834  | 94,13091   | 94,197175  |
| ID267419        |                      | 210,73056                                 | 209,071725  | 315,594985 | 151,2018   | 194,27791  | 75,08305   | 330,93945   | 425,747005  | 296,214325 | 170,05341 | 242,42297  | 163,888845 |
| ID113114        |                      | 77,04733                                  | 87,05339    | 64,94224   | 115,508265 | 119,32391  | 125,34377  | 36,96043    | 54,327665   | 45,35723   | 82,61067  | 76,07529   | 79,537635  |
| ID1692          |                      | 96,70764                                  | 105,35743   | 99,907675  | 129,136585 | 126,190925 | 120,64387  | 72,074085   | 70,703445   | 79,901985  | 5,359735  | 93,02423   | 99,48357   |
| ID261244        |                      | 81,990405                                 | 115,566765  | 88,56072   | 87,077095  | 231,079445 | 126,18489  | 43,977075   | 21,779775   | 36,79138   | 53,33863  | 55,65291   | 62,636385  |
| ID2048120       |                      | 108,035035                                | 122,876945  | 100,59085  | 163,143535 | 317,75288  | 244,62494  | 106,761695  | 99,114535   | 115,723255 | 401,87606 | 136,9142   | 120,728925 |
| ID782           |                      | 143,476535                                | 97,94737    | 139,256845 | 68,16177   | 59,352175  | 55,95336   | 249,1485    | 288,49743   | 236,022565 | 201,45621 | 183,027155 | 132,12531  |
| ID2027812       |                      | 49,61539                                  | 230,45302   | 48,10608   | 953,337465 | 1036,45253 | 215,24008  | 0           | 29,13066    | 28,9955    | 39,12558  | 0          | 25,098465  |
| ID1550          |                      | 43,25204                                  | 57,96712    | 50,00215   | 114,707665 | 91,84643   | 121,017445 | 27,72337    | 15,718905   | 30,33942   | 50,64825  | 72,77836   | 83,14027   |
| ID142473        |                      | 119,163655                                | 125,271345  | 98,13372   | 156,472395 | 147,693895 | 154,37951  | 83,29597    | 99,18377    | 81,797035  | 66,69552  | 104,321175 | 73,291935  |
| ID576672        |                      | 61,66639                                  | 56,08203    | 72,960355  | 146,044405 | 140,483865 | 62,96171   | 61,962115   | 55,54762    | 56,298495  | 43,17264  | 68,795295  | 65,97066   |
| ID10303         |                      | 137,45062                                 | 128,552615  | 132,396925 | 108,14848  | 103,159145 | 102,357855 | 122,97417   | 139,014075  | 122,53367  | 100,65424 | 97,50835   | 92,14941   |
| ID568037        |                      | 104,01042                                 | 110,66767   | 106,45814  | 116,744695 | 128,15347  | 83,953465  | 103,73492   | 103,480185  | 91,4138    | 72,98854  | 73,46926   | 74,6384    |
| ID1557          |                      | 185,28578                                 | 237,712765  | 123,391155 | 476,184275 | 245,18711  | 194,691115 | 164,34846   | 57,44878    | 81,506555  | 209,94425 | 64,5436    | 101,384715 |
| ID3763337       |                      | 163,11122                                 | 189,559165  | 184,46056  | 213,80634  | 101,08652  | 134,26687  | 111,85789   | 49,633245   | 93,66575   | 26,67726  | 3,794815   | 9,846485   |
| ID1996662       |                      | 112,128755                                | 138,375265  | 135,246965 | 315,74782  | n.d.       | 460,12967  | 110,78219   | 105,5287    | 94,795025  | 275,85962 | n.d.       | n.d.       |
| ID414           |                      | 103,45453                                 | 109,657095  | 105,49204  | 135,3427   | 127,276145 | 149,11418  | 77,393985   | 60,733735   | 60,490185  | 80,43141  | 70,44357   | 75,843965  |
| ID3762817       |                      | 107,925995                                | 110,30224   | 150,980265 | 97,166005  | 91,24055   | 92,144735  | 139,2646    | 187,56419   | 160,895845 | 108,42751 | 118,867165 | 71,33925   |
| ID1864541       |                      | 96,619765                                 | 107,90839   | 111,267995 | 118,399975 | 143,506555 | 104,16228  | 56,142045   | 100,35566   | 87,830255  | 43,05697  | 21,544025  | 32,101455  |
| ID2926520       |                      | 71,93129                                  | 73,67041    | 95,418615  | 88,07642   | 46,43828   | 40,720325  | 46,78488    | 23,02707    | 21,773005  | 71,95043  | 57,224595  | 120,646895 |
| ID2314456       |                      | 96,94816                                  | 93,87295    | 71,593985  | 92,996935  | 126,71973  | 100,158995 | 18,71971    | 4,24926     | 4,203865   | 320,38936 | 122,604575 | 184,232965 |
| ID1802534       |                      | 130,304505                                | 107,08659   | 128,12831  | 128,29507  | 112,186925 | 83,92484   | 212,51316   | 417,15651   | 206,291765 | 231,36372 | 196,755715 | 56,373265  |
| ID3762259       |                      | 123,11806                                 | 114,905215  | 112,689275 | 132,255235 | 132,18247  | 116,40973  | 48,031375   | 58,762555   | 57,643705  | 100,88358 | 72,67013   | 77,42799   |
| ID258601        |                      | 54,441505                                 | 60,33249    | 45,79932   | 117,958065 | 64,28487   | 134,010215 | 69,025795   | 97,487965   | 102,17638  | 49,91151  | 35,48705   | 90,212945  |
| ID1619          |                      | 76,906345                                 | 77,114075   | 89,127975  | 109,688345 | 94,41396   | 89,975975  | 81,674755   | 79,03633    | 86,463795  | 75,49876  | 78,334435  | 92,16954   |
| ID17878         |                      | 127,807765                                | 127,76742   | 123,172025 | 172,950475 | 154,395395 | 114,386925 | 88,417685   | 87,46315    | 89,59825   | 82,87843  | 93,424465  | 98,75056   |
| ID2030105       |                      | 101,66786                                 | 179,873375  | 106,04834  | 155,705925 | 164,273085 | 147,655775 | 25,993585   | 51,391055   | 43,68814   | 66,73719  | 41,5977    | 74,71061   |
| ID341           |                      | 97,985045                                 | 103,43031   | 89,23193   | 158,782515 | 128,14884  | 168,562705 | 74,120395   | 66,961895   | 59,595395  | 140,21489 | 86,265935  | 88,014635  |
| ID1520          |                      | 87,40652                                  | 97,010565   | 92,396215  | 96,045805  | 94,689755  | 105,879515 | 138,217995  | 155,481645  | 184,515105 | 105,99932 | 94,379275  | 92,308165  |
| ID206082        |                      | 88,183385                                 | 86,44233    | 91,222955  | 87,0192    | 86,47265   | 92,490755  | 82,954505   | 69,372625   | 85,36295   | 76,09478  | 66,986575  | 76,13736   |
| ID2138752       |                      | 10,9347                                   | 13,35486    | 5,27766    | 28,63507   | 20,01703   | 34,936275  | 23,761515   | 1,5973      | 8,35317    | 125,71459 | 31,612705  | 35,125565  |
| ID1472          |                      | 179,261705                                | 196,747685  | 193,81066  | 157,445205 | 125,523435 | 109,475885 | 167,48256   | 164,58378   | 167,399985 | 172,05745 | 117,570165 | 107,390285 |
| ID1978481       |                      | 12,141135                                 | 20,57319    | 15,423105  | 48,31476   | 37,82938   | 61,74145   | 17,119365   | 17,803555   | 12,713895  | 73,17372  | 67,419925  | 69,828485  |
| ID125371        |                      | 94,996355                                 | 103,303455  | 89,639395  | 173,52223  | 226,22947  | 160,913085 | 123,05703   | 62,22152    | 73,697295  | 82,24419  | 125,11241  | 87,47393   |
| ID3760248       |                      | 120,792695                                | 119,94087   | 126,02133  | 149,81535  | 142,125125 | 126,17982  | 44,933285   | 46,831205   | 52,92016   | 76,92632  | 79,924365  | 82,96835   |

Table S-1

| ID <sup>1</sup> | Protein <sup>2</sup> | Median of normalized volumes <sup>3</sup> |            |            |            |            |            |            |            |            |           |            |            |
|-----------------|----------------------|-------------------------------------------|------------|------------|------------|------------|------------|------------|------------|------------|-----------|------------|------------|
|                 |                      | co_0 min                                  | co_30 min  | co_60 min  | co_24 h    | co_48 h    | co_72 h    | PI_0 min   | PI_30 min  | PI_60 min  | PI_24 h   | PI_48 h    | PI_72 h    |
| ID595           |                      | 122,71854                                 | 127,006645 | 145,660055 | 241,894735 | 311,82467  | 143,353205 | 111,95792  | 125,40102  | 144,844105 | 117,04446 | 907,80403  | 304,666765 |
| ID2329037       |                      | 81,069265                                 | 90,476365  | 79,821565  | 91,08425   | 93,880565  | 125,60659  | 68,508355  | 66,72315   | 72,60604   | 91,30161  | 68,908515  | 79,35513   |
| ID1302          |                      | 16,909025                                 | 208,079375 | 33,360975  | 390,04402  | 235,11742  | 212,895325 | 25,16135   | 0,820155   | 45,24657   | 72,29867  | 0,29635    | 222,7962   |
| ID1593          |                      | 105,442675                                | 119,3645   | 101,46756  | 79,33764   | 81,329935  | 104,83973  | 82,978665  | 74,86094   | 87,3663    | 69,58593  | 72,958695  | 62,82048   |
| ID1814782       |                      | 301,064825                                | 122,18967  | 117,05639  | 55,47548   | 55,22172   | 48,774935  | 282,191165 | 277,801665 | 266,73876  | 187,69102 | 195,54004  | 134,746575 |
| ID453           |                      | 101,36451                                 | 103,040365 | 95,603635  | 134,466695 | 127,472755 | 127,864965 | 57,079515  | 58,821015  | 39,46676   | 7,79265   | 74,082365  | 77,325125  |
| ID1763762       |                      | 81,936455                                 | 93,720375  | 100,42191  | 173,084145 | 167,10079  | 99,21116   | 32,06184   | 90,757525  | 50,4493    | 0         | 38,12287   | 54,54517   |
| ID1787194       |                      | 113,999885                                | 116,937465 | 114,8336   | 178,00682  | 164,62488  | 160,436955 | 73,90044   | 62,44739   | 78,968245  | 16,26677  | 46,061795  | 11,469245  |
| ID47508         |                      | 63,96127                                  | 71,17758   | 67,82299   | 109,78321  | 107,218495 | 104,98856  | 88,172005  | 78,24274   | 79,289565  | 82,32238  | 84,4708    | 84,563935  |
| ID309           |                      | 95,71194                                  | 105,01136  | 95,75853   | 142,736375 | 147,386755 | 145,481435 | 68,54034   | 44,898505  | 56,40886   | 41,81139  | 63,568605  | 69,79333   |
| ID361           |                      | 105,73546                                 | 116,76749  | 128,78674  | 138,748615 | 136,32053  | 137,269355 | 78,567385  | 60,29072   | 57,2586    | 0         | 70,21911   | 61,534395  |
| ID1931678       |                      | 110,546535                                | 119,17795  | 126,52942  | 156,28411  | 224,61808  | 214,714225 | 87,0706    | 81,694155  | 91,34945   | 158,15838 | 178,322905 | 437,535035 |
| ID1985723       |                      | 109,35187                                 | 113,388705 | 146,754175 | 203,2356   | 145,803245 | 154,86228  | 230,426875 | 149,99366  | 168,25151  | 72,13297  | 63,483035  | 82,133245  |
| ID2070460       |                      | 79,474685                                 | 87,328595  | 75,39559   | 148,1525   | 125,400165 | 293,890465 | 63,161595  | 34,73102   | 35,01011   | 0,16914   | 18,765555  | 23,904305  |
| ID527           |                      | 77,52352                                  | 79,755985  | 70,512945  | 94,216795  | 102,96867  | 164,003485 | 46,80597   | 66,017175  | 46,20453   | 63,73746  | 62,060555  | 77,506795  |
| ID729           |                      | 111,751875                                | 99,23612   | 116,111805 | 85,606385  | 84,602145  | 84,81423   | 174,478645 | 160,15525  | 156,50853  | 158,89521 | 126,948415 | 114,9116   |
| ID576           |                      | 133,80121                                 | 128,101235 | 122,349615 | 165,06066  | 144,412325 | 125,05314  | 63,579265  | 57,95422   | 72,758545  | 105,07744 | 92,09313   | 100,096235 |
| ID1563          |                      | 294,8711                                  | 175,30137  | 130,60154  | 115,83268  | 105,15933  | 125,985435 | 101,69198  | 82,903335  | 94,936185  | 88,89503  | 99,40687   | 73,229125  |
| ID351055        |                      | 54,71722                                  | 62,54463   | 56,092765  | 93,842015  | 83,84246   | 112,75983  | 80,96368   | 64,24676   | 67,872545  | 162,33314 | 83,990985  | 74,707795  |
| ID1533          |                      | 135,62441                                 | 155,010535 | 173,986235 | 109,030955 | 136,43358  | 109,854455 | 68,873095  | 61,512985  | 97,4873    | 60,57087  | 60,338805  | 59,506855  |
| ID2016883       |                      | 74,06542                                  | 96,060855  | 71,442915  | 95,12271   | 102,05925  | 156,9562   | 74,7127    | 78,62687   | 80,513985  | 75,817    | 88,93311   | 75,39483   |
| ID2788379       |                      | 111,171535                                | 111,22265  | 107,385805 | 146,387135 | 145,27705  | 144,831045 | 77,2247    | 65,99275   | 70,20317   | 91,72955  | 88,99384   | 86,8693    |
| ID3485928       |                      | 23,03434                                  | 21,638975  | 25,936115  | 56,137675  | 49,616875  | 65,538505  | 49,942745  | 51,095735  | 53,473395  | 196,08946 | 83,03318   | 81,41056   |
| ID730           |                      | 224,542815                                | 133,52471  | 246,34172  | 116,878025 | 167,71506  | 35,925735  | 374,117815 | 760,421815 | 456,886245 | 263,17911 | 310,518035 | 231,257385 |
| ID1187          |                      | 77,74749                                  | 77,283055  | 74,887245  | 93,840615  | 77,54822   | 81,227255  | 118,08997  | 103,27666  | 92,66694   | 98,45173  | 85,81771   | 95,93594   |
| ID1138          |                      | 239,82265                                 | 224,60466  | 459,231485 | 145,33975  | 132,677185 | 117,114605 | 21,24972   | 46,585025  | 41,757985  | 52,23348  | 71,333235  | 96,604695  |
| ID523641        |                      | 118,07828                                 | 115,82578  | 123,63027  | 88,89288   | 92,11215   | 94,1808    | 97,009305  | 101,605575 | 104,09968  | 52,47845  | 102,949615 | 84,19836   |
| ID266132        |                      | 171,8162                                  | 126,844855 | 175,842485 | 95,3788    | 102,499015 | 62,894345  | 295,39129  | 373,130135 | 306,631285 | 156,64836 | 186,69715  | 140,397045 |
| ID315424        |                      | 75,358735                                 | 68,01601   | 70,96752   | 98,98835   | 111,006955 | 96,748135  | 64,669075  | 46,32334   | 56,20935   | 59,49621  | 74,64824   | 73,243215  |
| ID1434          |                      | 90,835915                                 | 100,211235 | 97,90253   | 96,57477   | 106,203485 | 132,35726  | 90,25473   | 108,27206  | 101,580255 | 90,35395  | 84,558545  | 89,37737   |
| ID543746        |                      | 108,771565                                | 109,07335  | 117,818385 | 135,461385 | 127,62152  | 119,8244   | 129,55582  | 99,506165  | 91,29744   | 80,98357  | 92,82206   | 87,94466   |
| ID2106278       |                      | 92,150305                                 | 109,38623  | 90,389275  | 186,467955 | 136,322305 | 161,48618  | 36,85709   | 5,241485   | 37,984815  | 14,58099  | 11,990845  | 22,930915  |
| ID1562          |                      | 74,51049                                  | 83,93114   | 77,48233   | 90,844445  | 89,551455  | 107,692245 | 64,450395  | 56,947425  | 63,02931   | 94,02835  | 80,904645  | 73,668805  |
| ID2115505       |                      | 80,8633                                   | 79,088775  | 97,2154    | 76,70473   | 74,307815  | 149,961705 | 78,255155  | 72,377805  | 72,27483   | 38,73395  | 56,10328   | 53,85178   |
| ID418           |                      | 162,360395                                | 115,35563  | 148,99276  | 66,2143    | 61,85672   | 73,012245  | 237,20025  | 239,570055 | 230,243015 | 196,38218 | 187,794765 | 109,74165  |
| ID509563        |                      | 185,402765                                | 101,04226  | 102,330855 | 241,26738  | 120,647435 | 93,194695  | 110,663595 | 232,769725 | 134,47626  | 0         | 54,81564   | 84,50641   |
| ID483           |                      | 92,74516                                  | 101,21239  | 88,258835  | 125,46156  | 115,62438  | 121,999325 | 77,09067   | 55,475735  | 59,94055   | 52,72991  | 67,79069   | 76,9909    |
| ID130985        |                      | 118,93337                                 | 116,18067  | 121,866775 | 138,725145 | 144,93303  | 134,90765  | 73,271935  | 56,298545  | 60,91359   | 83,16433  | 92,20025   | 85,529935  |
| ID65305         |                      | 101,46035                                 | 114,61633  | 103,412445 | 138,829515 | 147,27214  | 157,32476  | 67,880185  | 70,920435  | 77,576375  | 75,49778  | 115,987485 | 128,456865 |
| ID1219          |                      | 108,449985                                | 115,23138  | 118,918085 | 128,678975 | 101,1925   | 69,988135  | 72,582155  | 86,587465  | 79,1875    | 85,84094  | 75,923095  | 59,21469   |
| ID49585         |                      | 71,39651                                  | 64,952875  | 65,019275  | 64,19983   | 54,92391   | 60,28137   | 100,42747  | 99,270795  | 106,367605 | 104,84637 | 99,71037   | 87,777405  |
| ID1664          |                      | 108,52798                                 | 113,151235 | 132,20369  | 129,27327  | 134,572695 | 154,8874   | 102,32147  | 102,98819  | 114,315505 | 161,91953 | 104,559055 | 102,34357  |
| ID2742902       |                      | 61,47621                                  | 68,02739   | 73,172655  | 75,38951   | 70,87705   | 83,65208   | 51,30752   | 40,144725  | 55,140965  | 104,95774 | 79,9505    | 79,19513   |
| ID407           |                      | 114,788355                                | 89,738095  | 113,05445  | 73,716915  | 69,12344   | 89,739415  | 203,64232  | 229,92179  | 206,079295 | 169,28852 | 148,034865 | 114,11308  |
| ID1871260       |                      | 136,38039                                 | 103,16221  | 237,01502  | 239,789265 | 124,071065 | 40,10067   | 120,83953  | 197,389995 | 129,660445 | 85,43501  | 166,083605 | 38,9046    |
| ID419           |                      | 156,188855                                | 105,74305  | 144,989245 | 61,65529   | 59,85292   | 79,01422   | 234,77101  | 236,49458  | 222,093025 | 185,50557 | 166,373385 | 103,882375 |
| ID569671        |                      | 108,07036                                 | 115,842185 | 109,333205 | 111,91636  | 104,786855 | 80,8054    | 102,88609  | 104,810795 | 103,70216  | 90,78435  | 88,50102   | 72,207855  |
| ID5884          |                      | 70,75479                                  | 67,27594   | 74,78702   | 87,0976    | 105,838855 | 98,85125   | 26,76637   | 32,23328   | 36,80723   | 39,36775  | 81,17758   | 102,922875 |
| ID1036          |                      | 93,585525                                 | 96,546595  | 114,854495 | 94,409625  | 107,78918  | 100,92311  | 84,959565  | 83,67535   | 90,99164   | 102,70727 | 64,271965  | 66,53752   |
| ID1081          |                      | 114,958235                                | 112,390395 | 130,486855 | 98,29751   | 88,51492   | 118,506655 | 63,798385  | 65,931605  | 59,522445  | 46,21735  | 55,477315  | 65,004795  |
| ID1101          |                      | 133,867195                                | 141,18257  | 144,316385 | 142,762235 | 149,62815  | 144,93156  | 47,789215  | 45,92498   | 55,894365  | 59,81239  | 80,985385  | 87,06468   |
| ID92901         |                      | 47,774935                                 | 64,34315   | 63,1642    | 107,72178  | 121,43875  | 104,42345  | 72,743025  | 78,94643   | 77,97792   | 227,93326 | 103,965315 | 108,325085 |
| ID2150207       |                      | 25,12696                                  | 30,394155  | 34,1329    | 64,33286   | 21,76046   | 98,29184   | 96,35531   | 83,13524   | 103,7608   | 42,3432   | 48,67372   | 36,50564   |
| ID2649893       |                      | 61,451305                                 | 63,68599   | 61,70526   | 98,42037   | 80,103005  | 105,008825 | 77,03599   | 76,14507   | 82,198875  | 80,47801  | 59,76198   | 58,162335  |
| ID1518          |                      | 159,5304                                  | 151,41849  | 265,550265 | 139,308035 | 95,951405  | 83,68948   | 74,669695  | 37,59171   | 70,73281   | 75,97517  | 97,1296    | 127,118765 |
| ID1663          |                      | 100,64788                                 | 108,913895 | 94,8277    | 133,81593  | 125,72368  | 88,08534   | 96,935085  | 86,31525   | 100,93747  | 147,11407 | 107,67483  | 79,12692   |
| ID147614        |                      | 2,43505                                   | 3,501645   | 9,869415   | 87,0361    | 54,16631   | 116,24403  | 18,21142   | 11,47814   | 12,1504    | 96,38925  | 56,947705  | 57,65576   |

Table S-1

| ID <sup>1</sup> | Protein <sup>2</sup> | Median of normalized volumes <sup>3</sup> |            |            |            |            |             |            |            |            |           |            |            |
|-----------------|----------------------|-------------------------------------------|------------|------------|------------|------------|-------------|------------|------------|------------|-----------|------------|------------|
|                 |                      | co_0 min                                  | co_30 min  | co_60 min  | co_24 h    | co_48 h    | co_72 h     | PI_0 min   | PI_30 min  | PI_60 min  | PI_24 h   | PI_48 h    | PI_72 h    |
| ID2352301       |                      | 88,804605                                 | 101,92573  | 91,98611   | 91,85327   | 100,152555 | 124,667905  | 85,908245  | 93,41626   | 82,818745  | 101,24446 | 80,44374   | 83,73396   |
| ID1559          |                      | 55,737365                                 | 64,313395  | 55,486035  | 71,340315  | 72,837445  | 75,85233    | 349,380395 | 318,55564  | 399,866615 | 176,94504 | 112,138365 | 91,46191   |
| ID211213        |                      | 64,73198                                  | 69,746895  | 66,90758   | 83,274055  | 92,034775  | 80,528905   | 62,709985  | 67,713315  | 64,5012    | 211,81742 | 88,059895  | 88,62107   |
| ID1534          |                      | 117,080535                                | 119,64276  | 201,812205 | 113,098765 | 159,2855   | 114,687705  | 62,666995  | 27,346685  | 65,32947   | 60,06085  | 59,24753   | 55,12182   |
| ID9232          |                      | 106,10505                                 | 106,371025 | 108,46782  | 100,950605 | 112,366715 | 101,994315  | 90,457905  | 80,28645   | 85,025095  | 146,20381 | 93,63336   | 79,062075  |
| ID1303          |                      | 145,55733                                 | 172,23936  | 166,092905 | 146,09963  | 125,20006  | 114,072525  | 80,572325  | 110,70315  | 94,56817   | 91,77174  | 73,77506   | 93,991145  |
| ID529           |                      | 80,976115                                 | 86,46009   | 77,62198   | 119,394115 | 127,921965 | 128,51136   | 56,537525  | 49,4038    | 56,22581   | 50,06465  | 73,24094   | 81,106735  |
| ID57837         |                      | 83,01335                                  | 83,69646   | 84,722435  | 106,423965 | 126,475945 | 114,42089   | 37,74197   | 41,15351   | 44,483115  | 47,17216  | 87,42897   | 101,489285 |
| ID29087         |                      | 112,291455                                | 79,298915  | 119,231575 | 62,51018   | 47,223895  | 51,69238    | 205,212775 | 281,708655 | 232,71372  | 249,62082 | 179,652325 | 140,74402  |
| ID139104        |                      | 82,18552                                  | 83,68521   | 92,04534   | 92,534725  | 100,3388   | 142,1263    | 80,23118   | 67,917935  | 76,288485  | 78,53424  | 77,54226   | 69,495155  |
| ID344430        |                      | 63,04341                                  | 63,50533   | 62,74591   | 87,95295   | 117,518565 | 103,047385  | 52,9263    | 50,601375  | 66,516695  | 133,48572 | 90,827135  | 97,119035  |
| ID1295          |                      | 85,54462                                  | 135,44666  | 48,78551   | 141,455385 | 134,700195 | 144,338505  | 60,035895  | 31,5322    | 47,166215  | 56,76264  | 13,813185  | 10,520615  |
| ID1846930       |                      | 3,96599                                   | 8,629315   | 7,66973    | 17,49456   | 50,309505  | 23,129555   | 9,644265   | 48,48782   | 50,033305  | 34,315    | 40,84221   | 44,5395    |
| ID1190          |                      | 71,829185                                 | 71,55657   | 73,118805  | 100,395305 | 79,41341   | 76,16782    | 85,52413   | 42,01113   | 45,20506   | 76,21235  | 76,862955  | 84,145165  |
| ID1980598       |                      | n.d.                                      | n.d.       | n.d.       | 234,675205 | 145,4583   | 181,50459   | 91,087925  | 198,50671  | 169,37243  | 6,19211   | 0          | 0          |
| ID1135          |                      | 98,97814                                  | 93,57167   | 135,441485 | 88,414505  | 89,239315  | 96,466205   | 82,36368   | 89,60453   | 83,413245  | 59,31517  | 60,223305  | 67,91251   |
| ID1935188       |                      | 121,22397                                 | 144,878305 | 138,16151  | 142,746715 | 259,430345 | 217,3063    | 152,83108  | 137,642205 | 154,652145 | 120,19567 | 212,73553  | 453,84223  |
| ID115953        |                      | 82,80941                                  | 103,429985 | 67,598085  | 105,8365   | 107,96019  | 124,42344   | 65,90304   | 90,372995  | 89,60677   | 86,54981  | 79,46744   | 87,08314   |
| ID2379          |                      | 92,58309                                  | 90,686835  | 101,79174  | 102,494225 | 91,690845  | 54,82692    | 40,83151   | 36,03316   | 38,7386    | 17,42374  | 113,72794  | 148,27287  |
| ID137923        |                      | 98,23699                                  | 91,72591   | 96,08264   | 89,63839   | 93,044245  | 127,9899    | 84,32649   | 69,46497   | 64,481295  | 91,05298  | 78,7545    | 78,94983   |
| ID2019749       |                      | 121,61963                                 | 130,040985 | 131,986775 | 126,636805 | 127,758395 | 107,60094   | 37,872835  | 90,28675   | 42,04431   | 113,85609 | 107,98776  | 83,76478   |
| ID431675        |                      | 87,081575                                 | 99,092145  | 78,34474   | 115,527225 | 97,62729   | 99,104575   | 165,9295   | 131,72401  | 171,81153  | 463,39985 | 160,99189  | 142,551735 |
| ID2214          |                      | 58,69531                                  | 61,12139   | 70,81779   | 142,625145 | 85,29751   | 102,778995  | 70,527915  | 90,973485  | 90,04677   | 67,31214  | 57,993985  | 56,889395  |
| ID83022         |                      | 112,98355                                 | 119,424205 | 123,97176  | 101,53757  | 103,1296   | 116,242625  | 71,86962   | 68,02296   | 77,0408    | 79,36153  | 72,016355  | 74,279545  |
| ID1954          |                      | 102,87867                                 | 111,92872  | 115,466275 | 120,73192  | n.d.       | 6885,750755 | 59,726145  | 74,23885   | 77,291035  | 174,22498 | n.d.       | 250,0316   |
| ID3763726       |                      | 117,095445                                | 122,54615  | 120,61022  | 126,65894  | 128,258355 | 121,14704   | 85,962155  | 109,144675 | 109,228225 | 99,04305  | 110,33825  | 89,531965  |
| ID9000          |                      | 151,307655                                | 147,760195 | 150,87107  | 59,267945  | 41,85705   | 66,98712    | 50,453415  | 70,50528   | 53,543285  | 25,37923  | 38,28215   | 58,49482   |
| ID1700          |                      | 115,01214                                 | 98,4996    | 122,275625 | 108,129045 | 124,387085 | 103,3101    | 46,24273   | 33,366755  | 88,73333   | 313,96246 | 206,611915 | 186,328975 |
| ID1339          |                      | 126,04406                                 | 112,17297  | 105,627075 | 111,261395 | 99,40992   | 111,65556   | 60,69504   | 67,54123   | 66,45716   | 57,77957  | 64,51471   | 67,662225  |
| ID883           |                      | 89,109235                                 | 80,91299   | 80,993295  | 118,6212   | 117,81798  | 126,541995  | 99,114885  | 110,02108  | 108,43912  | 125,39226 | 97,132965  | 89,0509    |
| ID1797353       |                      | 129,589745                                | 153,225755 | 207,616835 | 169,989445 | 168,877675 | 118,8386    | 29,850805  | 21,844015  | 47,25429   | 51,1796   | 45,65573   | 39,950035  |
| ID1490          |                      | 80,395825                                 | 123,002535 | 216,888845 | 181,78645  | 401,77426  | 90,647715   | 51,612665  | 279,32822  | 70,007905  | 108,23317 | 477,693655 | 337,856775 |
| ID1195          |                      | 112,57918                                 | 118,73733  | 122,43396  | 121,372205 | 107,554145 | 95,30217    | 95,72908   | 91,675665  | 83,810385  | 96,32342  | 90,85486   | 97,93571   |
| ID41097         |                      | 135,160465                                | 85,848455  | 134,12954  | 45,9094    | 45,953285  | 62,902945   | 244,012085 | 287,459625 | 269,929865 | 197,29234 | 163,6089   | 120,70846  |
| ID4489          |                      | 51,133575                                 | 53,886855  | 52,26441   | 89,07747   | 89,85432   | 103,539745  | 24,93503   | 22,22044   | 26,121505  | 63,03838  | 59,57034   | 69,3079    |
| ID343050        |                      | 381,493195                                | 438,53621  | 528,721805 | 106,20669  | 93,8384    | 69,79804    | 841,44104  | 3608,29332 | 1576,49529 | 65,40071  | 86,75559   | 81,17143   |
| ID12822         |                      | 50,13933                                  | 46,19173   | 48,53141   | 133,593915 | 106,47587  | 88,070905   | 57,213635  | 73,687955  | 60,430795  | 85,95148  | 112,759495 | 121,849895 |
| ID1820          |                      | 67,10135                                  | 76,267185  | 71,572435  | 175,126265 | 183,524125 | 94,47787    | 53,027055  | 54,6996    | 60,804595  | 107,06156 | 176,27518  | 176,96325  |
| ID485827        |                      | 86,55777                                  | 88,956095  | 77,40999   | 120,68776  | 109,418445 | 105,864025  | 69,533805  | 77,632865  | 67,88262   | 99,05793  | 94,727925  | 103,63467  |
| ID1395          |                      | 68,255055                                 | 71,836565  | 78,163965  | 114,259295 | 121,83994  | 113,441465  | 46,67643   | 50,97719   | 54,551925  | 92,83993  | 100,99149  | 95,11794   |
| ID642           |                      | 114,940115                                | 120,18981  | 118,788205 | 151,536745 | 134,706235 | 135,085005  | 45,53342   | 35,42586   | 56,054205  | 70,57001  | 48,238595  | 38,726565  |
| ID713           |                      | 181,952315                                | 123,36779  | 175,20564  | 63,68519   | 56,697745  | 54,588305   | 295,319755 | 376,03097  | 311,07443  | 202,86315 | 186,34578  | 135,85062  |
| ID3022983       |                      | 107,901335                                | 120,90907  | 114,069265 | 77,391785  | 80,12003   | 83,03768    | 115,40325  | 112,19169  | 113,704825 | 53,4604   | 18,132875  | 19,88209   |
| ID288865        |                      | 81,34734                                  | 90,513305  | 64,99742   | 115,72115  | 122,625185 | 119,481495  | 85,2948    | 132,00012  | 88,56919   | 131,43473 | 128,063325 | 154,651775 |
| ID2081733       |                      | 91,138015                                 | 100,197935 | 96,979025  | 125,08616  | 127,281355 | 172,96811   | 75,7733    | 49,954335  | 60,69408   | 16,57732  | 60,11664   | 49,829285  |
| ID1819877       |                      | 214,94548                                 | 136,700315 | 120,467435 | 151,88531  | 95,551485  | 109,30962   | 105,33094  | 111,885365 | 174,25464  | 238,84351 | 42,449815  | 41,06516   |
| ID3557801       |                      | 114,97594                                 | 137,146945 | 117,21203  | 152,538075 | 161,38254  | 109,664955  | 145,564295 | 145,41808  | 146,01213  | 114,8282  | 111,288175 | 88,719775  |
| ID348           |                      | 89,59107                                  | 92,636085  | 92,291035  | 111,65375  | 103,65219  | 124,42482   | 91,518915  | 77,018175  | 72,68601   | 75,34445  | 80,30701   | 69,608715  |
| ID75950         |                      | 91,53777                                  | 111,445615 | 109,71526  | 132,38383  | 116,91312  | 123,027545  | 85,901375  | 87,976775  | 106,163885 | 63,46537  | 78,25755   | 79,78551   |
| ID1164          |                      | 107,088265                                | 116,11471  | 112,31182  | 108,477165 | 110,333715 | 114,301125  | 94,103555  | 94,103555  | 90,047285  | 108,2264  | 74,19207   | 73,51291   |
| ID1175          |                      | 112,887245                                | 131,985335 | 124,203805 | 127,28691  | 115,62221  | 121,349855  | 86,92343   | 93,92937   | 85,800905  | 69,38516  | 87,29969   | 91,998825  |
| ID1301          |                      | 81,26834                                  | 86,313355  | 93,027795  | 96,78887   | 139,688345 | 115,66251   | 63,896055  | 60,150265  | 69,37369   | 11,921    | 5,674285   | 0,9402     |
| ID2304779       |                      | 94,910655                                 | 98,58668   | 113,479855 | 121,94473  | 113,541185 | 101,980845  | 67,97641   | 80,344025  | 93,465135  | 86,2275   | 99,0705    | 82,82714   |
| ID138687        |                      | 79,320105                                 | 75,256055  | 75,55895   | 92,392325  | 97,243835  | 123,621705  | 88,67473   | 105,62735  | 89,67909   | 122,99731 | 96,00606   | 86,11583   |
| ID1590          |                      | 117,28594                                 | 109,83218  | 138,062935 | 91,17366   | 95,67413   | 83,291785   | 121,58287  | 121,41036  | 136,261805 | 35,17509  | 90,33574   | 123,39547  |
| ID300154        |                      | 182,702325                                | 340,36394  | 162,217385 | 280,249365 | 287,65439  | 171,92608   | 44,406995  | 46,13605   | 49,896075  | 66,3655   | 72,488895  | 79,01263   |
| ID158651        |                      | 129,277965                                | 143,675545 | 134,47381  | 122,495385 | 134,448055 | 103,866635  | 64,53159   | 72,749845  | 53,36934   | 63,49695  | 69,085405  | 55,1719    |

Table S-1

| ID <sup>1</sup> | Protein <sup>2</sup> | Median of normalized volumes <sup>3</sup> |            |            |            |            |            |             |            |            |           |            |            |
|-----------------|----------------------|-------------------------------------------|------------|------------|------------|------------|------------|-------------|------------|------------|-----------|------------|------------|
|                 |                      | co_0 min                                  | co_30 min  | co_60 min  | co_24 h    | co_48 h    | co_72 h    | PI_0 min    | PI_30 min  | PI_60 min  | PI_24 h   | PI_48 h    | PI_72 h    |
| ID1540          |                      | 59,84025                                  | 89,360415  | 79,16127   | 617,252875 | 348,3593   | 460,039225 | 112,968375  | 33,9295    | 21,82921   | 342,36918 | 673,92726  | 547,658955 |
| ID1537          |                      | 3230,033905                               | 1749,39121 | 331,68777  | 217,72824  | 222,233155 | 610,85381  | 2257,421615 | 1107,11174 | 1063,25417 | 2,34912   | 129,922065 | 10,39804   |
| ID1398          |                      | 96,17105                                  | 109,24088  | 106,264745 | 53,921435  | 105,4303   | 129,292965 | 73,181345   | 79,162485  | 72,179065  | 87,76954  | 104,661145 | 78,962035  |
| ID11611         |                      | 79,490725                                 | 102,826445 | 65,9484    | 76,82372   | 155,36683  | 282,141595 | 189,25233   | 138,077145 | 215,568    | 62,18937  | 61,99061   | 46,10876   |
| ID1780185       |                      | 112,632495                                | 115,0499   | 113,062515 | 164,44894  | 154,988535 | 152,418465 | 61,92563    | 2,412525   | 54,46447   | 8,9967    | 23,56336   | 20,53198   |
| ID938           |                      | 130,00201                                 | 154,413455 | 183,36247  | 347,274975 | 421,745675 | 144,88709  | 92,10737    | 85,30033   | 67,603275  | 71,79642  | 110,554645 | 85,584335  |
| ID3762296       |                      | 124,521455                                | 100,542815 | 115,739435 | 74,41259   | 65,91915   | 71,725895  | 191,45306   | 213,242065 | 211,683585 | 176,26662 | 176,489915 | 135,9988   |
| ID1466          |                      | 66,67105                                  | 71,761995  | 70,639105  | 75,649045  | 74,905175  | 73,72907   | 183,413775  | 190,548045 | 248,361295 | 152,7956  | 136,355415 | 112,14171  |
| ID1568          |                      | 122,34401                                 | 128,51952  | 126,878615 | 132,56879  | 123,39423  | 120,142175 | 60,08307    | 70,71017   | 81,97941   | 91,89186  | 94,648075  | 122,767445 |
| ID586           |                      | 54,238855                                 | 55,96623   | 68,726925  | 48,351615  | 10,00056   | 104,60038  | 22,05916    | 27,56523   | 36,428405  | 38,58667  | 15,62749   | 16,99368   |
| ID37898         |                      | 121,28608                                 | 129,11032  | 116,24601  | 151,13591  | 144,2459   | 146,265685 | 38,770985   | 39,32136   | 32,92366   | 19,52248  | 66,82149   | 70,34162   |
| ID1286          |                      | 103,32148                                 | 111,746505 | 110,69941  | 121,522785 | 113,636475 | 120,34312  | 123,18086   | 97,684835  | 89,445015  | 105,48216 | 86,88816   | 78,463045  |
| ID2023391       |                      | 93,40809                                  | 107,527385 | 94,31841   | 105,19748  | 97,234105  | 107,98443  | 72,76407    | 71,118975  | 80,34307   | 71,59269  | 67,605405  | 64,8821    |
| ID389942        |                      | 68,07212                                  | 83,52292   | 48,783005  | 109,46375  | 98,792655  | 104,58573  | 44,63804    | 22,32262   | 31,89796   | 86,39612  | 72,6352    | 88,70842   |
| ID1281          |                      | 128,73098                                 | 137,074125 | 128,159295 | 132,015655 | 110,15715  | 134,582615 | 119,972875  | 74,39905   | 57,789085  | 119,27151 | 95,86337   | 83,398965  |
| ID1338          |                      | 158,26173                                 | 92,747145  | 152,50476  | 62,72126   | 45,7101    | 52,113915  | 305,49524   | 349,89047  | 322,656635 | 11,71089  | 244,00662  | 148,36486  |
| ID1594          |                      | 113,632765                                | 120,84638  | 113,178105 | 144,569465 | 143,91953  | 136,781565 | 54,11036    | 47,10892   | 70,427415  | 57,14373  | 67,917785  | 67,111345  |
| ID16882         |                      | 87,006105                                 | 96,542885  | 94,632185  | 100,443255 | 101,03002  | 116,287405 | 91,022325   | 93,48081   | 110,936545 | 91,9462   | 82,0507    | 76,53579   |
| ID40401         |                      | 143,42854                                 | 87,333105  | 144,905665 | 50,674985  | 53,200645  | 42,915425  | 251,22497   | 300,334095 | 288,46815  | 199,29144 | 174,716735 | 125,782615 |
| ID317853        |                      | 64,038725                                 | 58,88287   | 62,684185  | 79,477445  | 93,884465  | 103,61332  | 62,87604    | 45,89891   | 57,16075   | 65,02554  | 71,123675  | 70,83957   |
| ID131133        |                      | 112,830765                                | 109,61742  | 113,681565 | 135,89198  | 139,001605 | 145,278175 | 75,971945   | 64,525155  | 67,91503   | 90,46607  | 86,906925  | 80,581165  |
| ID574883        |                      | 61,90115                                  | 67,50103   | 68,76158   | 95,358185  | 77,304335  | 80,883245  | 69,216555   | 68,385775  | 85,941135  | 88,17793  | 52,9095    | 69,336845  |
| ID2522          |                      | 67,83769                                  | 78,272575  | 79,279755  | 82,961795  | 78,702085  | 71,376925  | 57,630865   | 55,190595  | 68,635945  | 172,53386 | 81,124385  | 73,060275  |
| ID543455        |                      | 105,38979                                 | 103,06349  | 106,774365 | 99,047235  | 118,42796  | 122,28969  | 81,22002    | 82,90378   | 85,519605  | 160,59008 | 94,07557   | 77,104455  |
| ID1811207       |                      | 81,086845                                 | 54,455685  | 66,400125  | 106,854105 | 15,26506   | 44,649545  | 588,993225  | 349,37393  | 290,5182   | 186,72258 | 164,19901  | 97,291955  |
| ID3543802       |                      | 102,78576                                 | 117,7252   | 115,09785  | 119,749585 | 97,02779   | 87,336135  | 93,58823    | 90,95423   | 85,18291   | 90,57278  | 70,031365  | 74,962965  |
| ID987           |                      | 164,24297                                 | 172,79844  | 212,50267  | 172,682945 | 114,36971  | 103,379715 | 54,82221    | 288,210555 | 249,13299  | 89,4846   | 84,843395  | 79,363035  |
| ID3497145       |                      | 112,423025                                | 122,030925 | 135,847525 | 68,81591   | 82,51999   | 67,5512    | 159,44832   | 187,91526  | 178,850435 | 23,01285  | 16,998505  | 3,736265   |
| ID3062814       |                      | 82,44445                                  | 66,968855  | 81,134     | 114,09089  | 154,23387  | 128,663105 | 97,51173    | 97,516495  | 90,474945  | 102,56714 | 86,225695  | 76,7923    |
| ID2722863       |                      | 20,13368                                  | 10,31599   | 30,69113   | 94,743035  | 30,431635  | 108,207145 | 269,363855  | 189,62529  | 296,059515 | 5,6828    | 42,23716   | 11,279455  |
| ID51803         |                      | 56,853595                                 | 77,5689    | 51,545195  | 117,5188   | 178,388735 | 151,784695 | 20,89612    | 8,462775   | 17,993545  | 4,93605   | 52,671965  | 79,653845  |
| ID501           |                      | 115,994745                                | 120,319105 | 133,13864  | 110,439745 | 123,014345 | 112,972965 | 72,93516    | 52,657525  | 76,22423   | 0         | 58,66699   | 58,812545  |
| ID440           |                      | 93,11234                                  | 90,836575  | 88,949055  | 127,766315 | 131,73999  | 145,56281  | 47,72763    | 46,253855  | 33,221615  | 24,36247  | 66,547965  | 72,673195  |
| ID2549343       |                      | 123,720935                                | 127,202795 | 199,638055 | 142,847885 | 261,83178  | 225,48647  | 77,105255   | 42,715175  | 78,82471   | 64,69418  | 161,690345 | 143,073585 |
| ID2784333       |                      | 90,09745                                  | 95,700705  | 83,23815   | 123,63955  | 111,236145 | 96,56999   | 58,09983    | 45,05993   | 59,381315  | 190,06871 | 77,375365  | 75,44281   |
| ID2740977       |                      | 38,440355                                 | 36,521735  | 46,31367   | 58,037015  | 55,59753   | 70,34844   | 47,493965   | 40,181215  | 51,017545  | 117,12123 | 74,442005  | 74,39239   |
| ID2221628       |                      | 103,29689                                 | 113,02594  | 108,5676   | 134,052405 | 141,625765 | 133,61141  | 60,30146    | 59,989015  | 64,37824   | 31,30066  | 80,55073   | 62,71289   |
| ID1535          |                      | 86,84397                                  | 101,360095 | 87,814495  | 128,943555 | 132,08591  | 134,481215 | 40,47067    | 45,11821   | 60,10822   | 44,37343  | 77,96534   | 72,900655  |
| ID589226        |                      | 106,15912                                 | 109,658475 | 103,25565  | 89,7709    | 82,88338   | 97,286505  | 133,808475  | 156,099955 | 156,49096  | 113,49637 | 149,437815 | 129,465985 |
| ID574393        |                      | 107,23047                                 | 111,17093  | 102,89028  | 133,401065 | 125,459465 | 141,630745 | 64,61717    | 69,042265  | 67,36722   | 72,35268  | 72,634005  | 73,085265  |
| ID3019322       |                      | 200,989615                                | 240,48644  | 224,31618  | 170,95251  | 155,244355 | 303,89828  | 100,155345  | 200,38193  | 213,76808  | 76,12425  | 118,027135 | 98,394885  |
| ID1809464       |                      | 5,81851                                   | 25,20552   | 18,21267   | 161,865735 | 32,13476   | 271,83368  | n.d.        | 5,21719    | n.d.       | 0         | 15,010195  | 82,65868   |
| ID1765003       |                      | 129,509245                                | 120,7177   | 119,537445 | 83,19121   | 233,95487  | 74,00612   | 98,52272    | 55,15441   | 70,329115  | 23,98704  | 0          | 0          |
| ID25129         |                      | 105,61189                                 | 127,13387  | 93,392255  | 196,051275 | 147,27615  | 89,31077   | 65,417405   | 52,543355  | 74,176245  | 99,94237  | 92,714835  | 104,764    |
| ID706           |                      | 142,73955                                 | 144,89017  | 157,22193  | 144,13414  | 135,13965  | 79,431385  | 168,213115  | 207,92518  | 187,4109   | 133,08714 | 124,00275  | 98,454175  |
| ID146603        |                      | 86,29179                                  | 93,52475   | 89,512285  | 145,95561  | 140,52023  | 109,13184  | 44,503705   | 2,69478    | 62,000915  | 163,40756 | 111,271835 | 115,149565 |
| ID141431        |                      | 103,88165                                 | 84,92999   | 61,12886   | 177,785905 | 225,4191   | 197,862735 | 132,08672   | 65,30685   | 1338,43798 | 91,00318  | 76,50653   | 82,81822   |
| ID1844173       |                      | 90,54919                                  | 68,81938   | 72,997875  | 58,435695  | 44,894505  | 44,37721   | 199,46385   | 170,4485   | 195,87918  | 129,10759 | 119,60712  | 102,22096  |
| ID2100931       |                      | 74,517385                                 | 81,770905  | 78,18456   | 13,74136   | 66,15909   | 96,41397   | 52,21959    | 79,703105  | 62,670345  | 106,30699 | 201,32169  | 139,61357  |
| ID58577         |                      | 124,01995                                 | 180,090505 | 71,79957   | 169,761015 | 150,85036  | 119,51684  | 0           | 1,17198    | 4,21038    | 79,22636  | 96,365005  | 120,00688  |
| ID2099065       |                      | 98,806975                                 | 98,693465  | 99,73239   | 184,86294  | 134,582245 | 114,42919  | 85,30784    | 128,22688  | 94,58988   | 131,55675 | 187,093605 | 136,43845  |
| ID1129          |                      | 83,950835                                 | 92,18565   | 79,149215  | 130,18384  | 102,075825 | 118,61245  | 55,60902    | 54,4136    | 56,745245  | 80,89114  | 76,6361    | 77,58956   |
| ID1545          |                      | 99,84626                                  | 111,09121  | 98,73274   | 127,489425 | 121,36521  | 115,491645 | 68,83499    | 65,59699   | 79,308375  | 108,89203 | 81,896145  | 69,45467   |
| ID1763803       |                      | 106,353055                                | 114,859555 | 109,979935 | 171,44166  | 140,208405 | 149,944245 | 36,79988    | 7,773065   | 48,46438   | 2,15931   | 9,387805   | 8,168075   |
| ID461679        |                      | 99,24852                                  | 98,750565  | 124,371165 | 85,517565  | 99,0436    | 125,270365 | 74,726955   | 52,675505  | 70,70496   | 67,18041  | 52,032795  | 51,532065  |
| ID2592168       |                      | 337,1304                                  | 0,69788    | 103,34598  | 231,62483  | 206,621415 | 796,621415 | n.d.        | 3090,76636 | 506,66059  | 86,18725  | 0          | 0          |
| ID2354041       |                      | 35,519245                                 | 41,59888   | 42,1294    | 54,439525  | 69,77037   | 77,03347   | 44,331725   | 54,580725  | 56,342585  | 91,95672  | 70,138265  | 76,666805  |

Table S-1

| ID <sup>1</sup> | Protein <sup>2</sup> | Median of normalized volumes <sup>3</sup> |            |            |            |            |            |            |            |            |           | PI_48 h    | PI_72 h    |
|-----------------|----------------------|-------------------------------------------|------------|------------|------------|------------|------------|------------|------------|------------|-----------|------------|------------|
|                 |                      | co_0 min                                  | co_30 min  | co_60 min  | co_24 h    | co_48 h    | co_72 h    | PI_0 min   | PI_30 min  | PI_60 min  | PI_24 h   |            |            |
| ID2974603       |                      | 81,717445                                 | 91,756585  | 80,7711    | 101,315695 | 95,148975  | 115,16436  | 61,258405  | 57,53368   | 62,03811   | 63,2841   | 82,61586   | 77,109835  |
| ID3763073       |                      | 78,521595                                 | 73,23173   | 68,197775  | 87,9567    | 121,30427  | 122,166245 | 130,657765 | 130,530755 | 122,102505 | 84,26883  | 103,679775 | 58,212175  |
| ID320497        |                      | 117,465315                                | 122,255185 | 107,891355 | 138,81901  | 162,05816  | 207,06571  | 72,06987   | 74,185645  | 61,080245  | 76,82252  | 86,944955  | 72,8495    |
| ID1538          |                      | 106,997105                                | 131,1965   | 108,0989   | 120,512455 | 113,334685 | 127,087195 | 121,95233  | 96,931045  | 121,152965 | 98,787    | 83,21353   | 80,657145  |
| ID89291         |                      | 71,013065                                 | 80,615175  | 69,113     | 168,72176  | 102,889975 | 113,466115 | 75,90456   | 20,203685  | 50,81431   | 79,13009  | 66,50221   | 47,34136   |
| ID377           |                      | 101,932                                   | 113,093125 | 113,181805 | 174,955015 | 163,915485 | 151,576445 | 42,852375  | 34,081655  | 33,55918   | 0         | 51,051415  | 41,74678   |
| ID590           |                      | 94,15706                                  | 103,264805 | 97,823085  | 138,55836  | 158,07679  | 150,608385 | 64,30915   | 46,56995   | 74,85335   | 8,02359   | 73,73256   | 69,931355  |
| ID31044         |                      | 58,94079                                  | 66,878775  | 62,801225  | 99,69369   | 88,45773   | 98,56271   | 58,937585  | 43,497305  | 53,872505  | 66,726155 | 92,146675  | 85,99744   |
| ID323167        |                      | 99,91281                                  | 98,24606   | 106,744515 | 116,195315 | 123,705675 | 121,50091  | 105,420835 | 90,28489   | 80,21844   | 73,74985  | 79,933555  | 77,23258   |
| ID386066        |                      | 67,398735                                 | 73,658675  | 79,627625  | 113,73428  | 95,075565  | 110,643405 | 59,439455  | 36,74814   | 49,726705  | 104,34857 | 70,291655  | 74,431945  |
| ID57776         |                      | 89,52877                                  | 94,808145  | 88,511615  | 65,60779   | 84,58441   | 94,20617   | 119,66903  | 126,041295 | 121,21231  | 135,7756  | 102,868035 | 91,150665  |
| ID3275754       |                      | 103,93434                                 | 119,70719  | 114,96195  | 119,353125 | 107,569415 | 153,460095 | 166,495015 | 129,516395 | 109,452585 | 15,62739  | 41,96846   | 20,246255  |
| ID1712          |                      | 122,93802                                 | 138,137915 | 135,41243  | 119,03486  | 117,09945  | 94,339565  | 108,39386  | 100,935905 | 118,49554  | 97,84574  | 92,752885  | 94,382895  |
| ID1650          |                      | 75,13102                                  | 83,599     | 74,08376   | 87,758365  | 98,674515  | 105,928135 | 62,70311   | 122,09045  | 70,433805  | 83,96955  | 89,655035  | 80,3937    |
| ID2729506       |                      | 135,90269                                 | 79,654595  | 135,836555 | 43,218965  | 43,776285  | 48,577345  | 279,803805 | 363,489075 | 275,841615 | 273,38475 | 241,31047  | 157,50152  |
| ID495           |                      | 65,87788                                  | 73,6995    | 71,99423   | 101,97527  | 93,916825  | 106,60332  | 39,76124   | 30,54457   | 34,247785  | 60,40968  | 75,97479   | 84,181905  |
| ID16614         |                      | 100,390515                                | 104,500075 | 111,41293  | 86,71997   | 87,90825   | 103,82946  | 76,372205  | 70,427585  | 96,574465  | 109,42147 | 84,97401   | 74,655315  |
| ID167310        |                      | 131,31765                                 | 151,26069  | 138,22415  | 146,18736  | 138,46675  | 122,610145 | 70,714955  | 84,714565  | 93,477885  | 88,83764  | 85,543655  | 90,303525  |
| ID185058        |                      | 71,313225                                 | 73,702855  | 73,73822   | 92,55473   | 97,7565    | 110,853025 | 100,736125 | 82,65474   | 86,72345   | 95,66108  | 88,47859   | 76,456395  |
| ID1544          |                      | 97,038565                                 | 103,092075 | 91,68229   | 119,97317  | 109,26788  | 116,33504  | 70,70789   | 65,823785  | 76,21448   | 84,07149  | 73,625665  | 75,643255  |
| ID2142601       |                      | 21,921225                                 | 6,8382     | 39,94863   | 14,57335   | 7,66057    | 17,149775  | 89,76496   | 45,896795  | 80,509775  | 20,28775  | 7,27023    | 1,266965   |
| ID3479720       |                      | 97,898195                                 | 52,11595   | 73,04462   | 43,399565  | 22,4133    | 40,45059   | 237,64551  | 202,856365 | 264,22523  | 182,37411 | 170,061935 | 106,207835 |

Table S-2

**Table S-2: Established protein spot index obtained from Delta 2D analysis.** Only protein spots, which show fold-changes  $\leq(-1.5)$  and  $\geq 1.5$  for at least one time point are indicated (1187).

Protein identifications as well as informations obtained from Ingenuity Pathway Analysis (IPA)-software package were appended.

Fold-changes were calculated by the division of the Medians of normalized values of each time point after plasma treatment by the Medians of normalized values of the respective time point of untreated (control) cells.

<sup>1</sup> hit ID obtained from Delta2D analysis (Delta2D statistically software version 4.4, Decodon (Germany, Greifswald))

<sup>2</sup> protein identification corresponding to human proteins (UniProt-SwissProt database; Rel. 51.5 restricted to human taxonomy)

<sup>3</sup> Fold-changes (fc) after 0, 30, 60 min and 24, 48 and 72 h of plasma treatment of S9 epithelial cells

<sup>4</sup> IPA (Ingenuity pathway analysis) symbol

<sup>5</sup> Entrez gene name (protein function) obtained from IPA

<sup>6</sup> location in the cell obtained from IPA

<sup>7</sup> type(s) of protein function obtained from IPA

Table S-2

| ID <sup>1</sup> | Protein <sup>2</sup> | 0 min <sup>3</sup> | 30 min <sup>3</sup> | 60 min <sup>3</sup> | 24 h <sup>3</sup> | 48 h <sup>3</sup> | 72 h <sup>3</sup> | IPA symbol <sup>14</sup> | Entrez gene name <sup>15</sup>                                                              | location <sup>16</sup> | type(s) <sup>17</sup>   |
|-----------------|----------------------|--------------------|---------------------|---------------------|-------------------|-------------------|-------------------|--------------------------|---------------------------------------------------------------------------------------------|------------------------|-------------------------|
| ID1449          | 1433B, 1433G         | -1,721             | -1,877              | -1,587              | -1,352            | -1,467            | -1,719            | YWHAB                    | tyrosine 3-monooxygenase/tryptophan 5-monooxygenase activation protein, beta polypeptide    | cytoplasm              | other                   |
| ID1403          | 1433E                | -1,572             | -1,710              | -1,545              | -1,464            | -1,568            | -1,725            | YWHAE                    | tyrosine 3-monooxygenase/tryptophan 5-monooxygenase activation protein, epsilon polypeptide | cytoplasm              | other                   |
| ID1391          | 1433E, CLIC1         | -1,335             | -1,349              | -1,249              | -1,555            | -1,435            | -1,409            | YWHAE                    | tyrosine 3-monooxygenase/tryptophan 5-monooxygenase activation protein, epsilon polypeptide | cytoplasm              | other                   |
| ID1425          | 1433G                | -1,660             | -1,793              | -1,716              | -1,425            | -1,480            | -1,263            | YWHAG                    | tyrosine 3-monooxygenase/tryptophan 5-monooxygenase activation protein, gamma polypeptide   | cytoplasm              | other                   |
| ID1438          | 1433S                | -1,533             | -1,561              | -1,341              | -1,507            | -1,560            | -1,557            | SFN                      | 14-3-3 protein sigma                                                                        |                        |                         |
| ID1429          | 1433T, 1433Z         | -1,964             | -1,970              | -1,859              | -1,676            | -1,675            | -1,624            | YWHAAQ                   | tyrosine 3-monooxygenase/tryptophan 5-monooxygenase activation protein, theta polypeptide   | cytoplasm              | other                   |
| ID1430          | 1433Z                | -1,576             | -1,645              | -1,548              | -1,364            | -1,421            | -1,487            | YWHAZ                    | tyrosine 3-monooxygenase/tryptophan 5-monooxygenase activation protein, zeta polypeptide    | cytoplasm              | other                   |
| ID767           | 2AAB, UBQL1          | 1,793              | 3,406               | 1,999               | 4,191             | 3,819             | 2,907             | PPP2R1B                  | protein phosphatase 2, regulatory subunit A, beta                                           | unknown                | phosphatase             |
| ID1399          | 3HIDH, PSME1         | -1,675             | -1,913              | -1,616              | -1,310            | -1,535            | -1,726            | HIBADH                   | 3-hydroxyisobutyrate dehydrogenase                                                          | cytoplasm              | enzyme                  |
| ID651           | ACPH                 | -1,624             | -1,323              | -1,442              | -1,677            | -1,560            | -1,687            | APEH                     | N-acylaminoacyl-peptide hydrolase                                                           | cytoplasm              | peptidase               |
| ID1114          | ACTB                 | 1,386              | 1,862               | 1,366               | 1,898             | 1,698             | 1,688             | ACTB                     | actin, beta                                                                                 | cytoplasm              | other                   |
| ID1067          | ACTG                 | -1,038             | -1,007              | 1,092               | -2,134            | -1,403            | 1,285             | ACTG1                    | actin, gamma 1                                                                              | cytoplasm              | other                   |
| ID1073          | ACTG, ACTB           | 1,741              | 1,481               | 1,311               | 1,076             | -1,209            | -1,537            | ACTG1                    | actin, gamma 1                                                                              | cytoplasm              | other                   |
| ID1008          | ACTG, ACTB           | -1,128             | -1,087              | -1,225              | -1,335            | -1,286            | -1,582            | ACTG1                    | actin, gamma 1                                                                              | cytoplasm              | other                   |
| ID360270        | ACTG, ACTB           | -2,224             | -1,413              | -3,080              | -1,013            | -1,303            | -1,163            | ACTG1                    | actin, gamma 1                                                                              | cytoplasm              | other                   |
| ID209100        | ACTG, ACTB           | -3,098             | -24,977             | -5,578              | -1,414            | -1,390            | -1,535            | ACTG1                    | actin, gamma 1                                                                              | cytoplasm              | other                   |
| ID1055          | ACTG, IF34           | 1,042              | 1,480               | 1,851               | -1,242            | 1,251             | 1,291             | ACTG1                    | actin, gamma 1                                                                              | cytoplasm              | other                   |
| ID1034          | ACTG, K1C18          | 1,591              | 1,450               | 1,314               | -1,153            | -1,179            | -1,461            | ACTG1                    | actin, gamma 1                                                                              | cytoplasm              | other                   |
| ID1080          | ACTG, K1C18          | -1,336             | -1,403              | -1,573              | -1,634            | -1,697            | -1,537            | ACTG1                    | actin, gamma 1                                                                              | cytoplasm              | other                   |
| ID1227          | ACTG, PP2AB          | -1,377             | -1,578              | -1,414              | -1,329            | -1,109            | -1,330            | ACTG1                    | actin, gamma 1                                                                              | cytoplasm              | other                   |
| ID517           | ACTN4                | -1,399             | -1,508              | -1,633              | -1,728            | -1,698            | -1,544            | ACTN4                    | actinin, alpha 4                                                                            | cytoplasm              | other                   |
| ID8247          | ACTN4                | -1,346             | -1,895              | -1,802              | -2,927            | -2,060            | -1,811            | ACTN4                    | actinin, alpha 4                                                                            | cytoplasm              | other                   |
| ID518           | ACTN4, ERO1A         | -1,697             | -1,903              | -1,846              | -2,135            | -1,896            | -1,445            | ACTN4                    | actinin, alpha 4                                                                            | cytoplasm              | other                   |
| ID507           | ACTN4, HS105         | -1,933             | -2,094              | -2,091              | -2,292            | -2,069            | -1,500            | ACTN4                    | actinin, alpha 4                                                                            | cytoplasm              | other                   |
| ID8700          | ACTN4, MVP           | -2,168             | -1,457              | -2,174              | -2,505            | -1,452            | -1,862            | ACTN4                    | actinin, alpha 4                                                                            | cytoplasm              | other                   |
| ID1047          | ADRM1, ACTG          | -1,176             | -1,575              | -1,803              | -1,486            | -1,547            | -1,319            | ADRM1                    | adhesion regulating molecule 1                                                              | plasma membrane        | other                   |
| ID1077          | AHSA1, ACTG          | -1,772             | -1,899              | -1,604              | -1,344            | -1,330            | -1,219            | AHSA1                    | AHA1, activator of heat shock 90kDa protein ATPase homolog 1 (yeast)                        | cytoplasm              | other                   |
| ID169714        | AIBP, CI032          | -1,623             | -1,409              | -1,521              | -1,285            | -1,468            | -1,352            | NAXE                     | NAD(P)H-hydrate epimerase                                                                   |                        |                         |
| ID894           | AL1B1                | -1,195             | -1,549              | -1,210              | -11,621           | -1,153            | -1,098            | ALDH1B1                  | aldehyde dehydrogenase 1 family, member B1                                                  | cytoplasm              | enzyme                  |
| ID939           | AL9A1                | -1,708             | -1,761              | -1,474              | -2,091            | -1,639            | -1,676            | ALDH9A1                  | aldehyde dehydrogenase 9 family, member A1                                                  | cytoplasm              | enzyme                  |
| ID1386          | ALBU                 | -1,844             | -1,617              | -1,661              | -1,569            | -1,518            | -1,505            | ALB                      | serum albumin                                                                               |                        |                         |
| ID1828633       | ALDOA                | 1,473              | 3,254               | 1,784               | 3,488             | 3,495             | 2,434             | ALDOA                    | fructose-bisphosphate aldolase A                                                            |                        |                         |
| ID2003479       | AN32A                | -2,962             | -1,387              | -1,548              | 1,075             | -1,770            | 1,025             | ANP32A                   | acidic leucine-rich nuclear phosphoprotein 32 family member A                               |                        |                         |
| ID3661699       | ANXA1, DCPS          | 1,359              | 1,130               | -1,102              | -1,363            | -1,446            | -1,651            | ANXA1                    | annexin A1                                                                                  |                        |                         |
| ID2588249       | ANXA2, NACA          | -5,373             | -4,819              | 1,059               | -1,463            | -1,288            | -1,663            | ANXA2                    | annexin A2                                                                                  | plasma membrane        | other                   |
| ID1351          | ANXA3                | -1,606             | -1,725              | -1,651              | -1,719            | -1,568            | -1,350            | ANXA3                    | annexin A3                                                                                  | cytoplasm              | enzyme                  |
| ID213992        | ANXA5                | -1,710             | -1,618              | -1,374              | -1,661            | -1,595            | -1,760            | ANXA5                    | annexin A5                                                                                  | plasma membrane        | other                   |
| ID1345          | ANXA5, SFRS2         | 2,019              | 2,078               | 1,659               | 1,947             | 1,244             | -1,170            | ANXA5                    | annexin A5                                                                                  | plasma membrane        | other                   |
| ID341707        | APT                  | -8,968             | -6,247              | -5,750              | -4,329            | -1,190            | -1,014            | APRT                     | adenine phosphoribosyltransferase                                                           |                        |                         |
| ID965           | ARP3                 | -1,690             | -1,986              | -1,653              | -2,411            | -1,920            | -1,677            | ACTR3                    | ARP3 actin-related protein 3                                                                | plasma membrane        | other                   |
| ID3329884       | ARP3, TADBP          | 55,374             | 8,673               | 5,524               | 1,637             | 1,511             | 1,239             | ACTR3                    | ARP3 actin-related protein 3                                                                | plasma membrane        | other                   |
| ID1046          | ARP3, TADBP          | 1,545              | 1,185               | 1,210               | -1,261            | -1,439            | -1,779            | ACTR3                    | ARP3 actin-related protein 3                                                                | plasma membrane        | other                   |
| ID1152          | ASNA1                | -1,865             | -2,127              | -1,805              | -1,463            | -1,443            | -1,493            | ARSA1                    | ATPase ASNA1                                                                                | nucleus                | enzyme                  |
| ID3737          | ATPB                 | -1,150             | -1,253              | 1,036               | 1,552             | 1,027             | -1,046            | ATP5B                    | ATP synthase, H+ transporting, mitochondrial F1 complex, beta polypeptide                   | cytoplasm              | transporter             |
| ID936           | BASP                 | -1,724             | -3,369              | -1,765              | -1,867            | -1,984            | -1,496            | BASP1                    | brain acid soluble protein 1                                                                |                        |                         |
| ID48368         | BASP                 | -4,466             | -101,014            | -9,762              | -3,160            | -2,017            | -2,963            | BASP1                    | brain acid soluble protein 1                                                                |                        |                         |
| ID2010414       | BCCIP, ACTG          | -1,195             | -1,395              | -1,050              | -1,394            | -1,496            | -2,422            | BCCIP                    | BRCA2 and CDKN1A-interacting protein                                                        | nucleus                |                         |
| ID1596          | BID, RBM8A           | -1,023             | -1,691              | -1,389              | -2,122            | -1,523            | -1,987            | BID                      | BH3 interacting domain death agonist                                                        | cytoplasm              | other                   |
| ID951           | BLMH, LA             | -1,543             | -1,516              | -1,583              | -1,766            | -1,362            | -1,422            | BLMH                     | bleomycin hydrolase                                                                         | cytoplasm              | peptidase               |
| ID488759        | CALD1                | -1,483             | -1,762              | -1,321              | 6,007             | -2,367            | -1,780            | CALD1                    | caldesmon 1                                                                                 | cytoplasm              | other                   |
| ID1702          | CALM                 | -1,297             | 3,171               | -1,153              | 1,012             | -1,189            | -1,152            | CALM1                    | calmodulin 1 (phosphorylase kinase, delta)                                                  | plasma membrane        | other                   |
| ID745           | CALR, KAPO           | 1,875              | 2,607               | 2,264               | 3,600             | 3,665             | 2,590             | CALR                     | calreticulin                                                                                | cytoplasm              | transcription regulator |
| ID53317         | CALU                 | 1,089              | -1,077              | 1,109               | 1,404             | -1,189            | -1,581            | CALU                     | calumenin                                                                                   | cytoplasm              | other                   |
| ID54018         | CALU                 | 1,090              | -1,101              | 1,205               | 1,202             | -1,431            | -1,919            | CALU                     | calumenin                                                                                   | cytoplasm              | other                   |
| ID2006762       | CALU                 | -2,395             | -2,907              | -1,625              | -3,976            | -38,999           | -5,875            | CALU                     | calumenin                                                                                   | cytoplasm              | other                   |
| ID1106          | CAPG                 | -1,339             | -1,658              | -1,329              | -1,421            | -1,375            | -1,367            | CAPG                     | capping protein (actin filament), gelsolin-like                                             | nucleus                | other                   |
| ID496907        | CAPG                 | -1,975             | -2,111              | -2,089              | -2,535            | -1,783            | -2,427            | CAPG                     | capping protein (actin filament), gelsolin-like                                             | nucleus                | other                   |
| ID1440          | CAPZB                | -1,245             | -1,387              | -1,198              | -1,207            | -1,473            | -1,598            | CAPZB                    | F-actin-capping protein subunit beta                                                        | cytoskeleton           |                         |
| ID1512          | CATB                 | 1,771              | 3,379               | 2,274               | 1,925             | 1,566             | 1,136             | CTSB                     | cathepsin B                                                                                 | cytoplasm              | peptidase               |

Table S-2

| ID <sup>1</sup> | Protein <sup>2</sup>      | 0 min <sup>3</sup> | 30 min <sup>3</sup> | 60 min <sup>3</sup> | 24 h <sup>3</sup> | 48 h <sup>3</sup> | 72 h <sup>3</sup> | IPA symbol <sup>14</sup> | Entrez gene name <sup>15</sup>                                                          | location <sup>16</sup> | type(s) <sup>17</sup> |
|-----------------|---------------------------|--------------------|---------------------|---------------------|-------------------|-------------------|-------------------|--------------------------|-----------------------------------------------------------------------------------------|------------------------|-----------------------|
| ID163898        | CBX1                      | 1,282              | -1,260              | -1,069              | -1,453            | -1,419            | -1,556            | CBX1                     | chromobox protein homolog 1                                                             | nucleus                | other                 |
| ID1547          | CBX1                      | -1,099             | -2,149              | -1,812              | -1,455            | -1,271            | -1,130            | CBX1                     | chromobox protein homolog 1                                                             | nucleus                | other                 |
| ID1618          | CBX3                      | -2,072             | -5,708              | -3,537              | -9,741            | -4,576            | -6,039            | CBX3                     | chromobox protein homolog 3                                                             | nucleus                | other                 |
| ID1530          | <b>CBX5</b> , CATB        | 1,198              | 1,239               | 1,319               | -1,858            | -1,518            | -1,806            | CBX5                     | chromobox homolog 5                                                                     | nucleus                | other                 |
| ID3270147       | <b>CBX5</b> , CATB        | 1,144              | -1,257              | -1,110              | 1,121             | 1,637             | -1,144            | CBX5                     | chromobox homolog 5                                                                     | nucleus                | other                 |
| ID941           | CD2B2                     | -1,546             | -2,273              | -1,504              | -1,463            | -2,048            | -1,824            | CD2B2                    | CD2 antigen cytoplasmic tail-binding protein 2                                          | nucleus                | other                 |
| ID958           | <b>CDC37</b> , PRS6B      | -1,459             | -1,705              | -1,549              | -1,533            | -1,413            | -1,359            | CHP1                     | Hsp90 co-chaperone Cdc37                                                                |                        |                       |
| ID826           | <b>CH60</b> , STK3        | 1,529              | 1,710               | 1,570               | 1,354             | 1,183             | -1,087            | HSPD1                    | heat shock 60kDa protein 1 (chaperonin)                                                 | cytoplasm              | enzyme                |
| ID1268          | <b>CHM4B</b> , RPB3       | -1,258             | -1,554              | -1,350              | -1,213            | -1,257            | -1,196            | CHMP48                   | charged multivesicular body protein 4b                                                  | cytoplasm              |                       |
| ID2212082       | CHP1                      | 1,161              | -1,348              | -1,041              | -6,972            | -1,601            | -2,310            | CHP1                     | calcineurin B homologous protein 1                                                      |                        |                       |
| ID1378          | CLIC1                     | -2,109             | -1,833              | -1,747              | -1,457            | -1,486            | -1,301            | CLIC1                    | chloride intracellular channel 1                                                        | nucleus                | ion channel           |
| ID1478          | <b>CLIC4</b> , ACTG, NNM1 | 1,197              | 1,385               | 1,165               | 2,790             | 1,112             | -1,103            | CLIC4                    | chloride intracellular channel protein 4                                                | nucleus                | ion channel           |
| ID909           | <b>CNDP2</b> , HNRH1      | -1,609             | -1,793              | -1,796              | -2,012            | -2,029            | -1,799            | CNDP2                    | CNDP dipeptidase 2 (metallopeptidase M20 family)                                        | cytoplasm              | peptidase             |
| ID901           | <b>CNDP2</b> , PEPD       | -1,436             | -1,522              | -1,375              | -1,625            | -1,670            | -1,601            | CNDP2                    | CNDP dipeptidase 2 (metallopeptidase M20 family)                                        | cytoplasm              | peptidase             |
| ID3392731       | <b>CNDP2</b> , PEPD       | -1,510             | -2,060              | -1,547              | -1,424            | -1,278            | -1,472            | CNDP2                    | CNDP dipeptidase 2 (metallopeptidase M20 family)                                        | cytoplasm              | peptidase             |
| ID1168          | CNN3                      | -1,233             | -1,524              | -1,410              | -1,600            | -1,439            | -1,252            | CNN3                     | calponin 3, acidic                                                                      | cytoplasm              | other                 |
| ID1165          | CNN3                      | -1,167             | -1,541              | -1,651              | -1,551            | -1,609            | -1,244            | CNN3                     | calponin 3, acidic                                                                      | cytoplasm              | other                 |
| ID1154          | <b>CNN3</b> , IDH3A       | -1,528             | -1,926              | -1,562              | -1,949            | -1,284            | -1,321            | CNN3                     | calponin 3, acidic                                                                      | cytoplasm              | other                 |
| ID1641          | COF1                      | -2,618             | -2,639              | -1,874              | -1,704            | -2,418            | -2,170            | CFI1                     | cofilin 1 (non-muscle)                                                                  | nucleus                | other                 |
| ID693           | <b>COR1B</b> , CBR4       | 1,160              | -1,061              | 1,070               | 1,467             | 2,382             | 1,794             | CORO1B                   | coronin, actin binding protein, 1B                                                      | cytoplasm              | other                 |
| ID1769          | COTL1                     | -1,885             | -2,007              | -1,616              | -1,290            | -1,308            | -1,077            | COTL1                    | coactosin-like 1 (Dictyostelium)                                                        | cytoplasm              | other                 |
| ID791           | CPNE1                     | 1,014              | 1,008               | -1,029              | -1,726            | -1,407            | -1,526            | CPNE1                    | copine 1                                                                                | unknown                | transporter           |
| ID2001699       | CPNS1                     | -1,472             | -1,308              | -1,638              | -1,218            | -1,265            | -1,297            | CAPNS1                   | calpain, small subunit 1                                                                | cytoplasm              | peptidase             |
| ID1401          | <b>CPNS1</b> , GDIR       | -1,779             | -1,766              | -1,458              | -1,512            | -1,628            | -1,604            | CAPNS1                   | calpain, small subunit 1                                                                | cytoplasm              | peptidase             |
| ID1502          | CRK                       | 1,559              | 2,706               | 1,806               | 1,872             | 1,489             | 1,422             | CRK                      | adaptor molecule crk                                                                    | cytoplasm              | other                 |
| ID17270         | CSN4                      | -1,589             | -2,003              | -1,782              | -1,441            | -1,417            | -1,293            | COPS4                    | COP9 constitutive photomorphogenic homolog subunit 4 (Arabidopsis)                      | cytoplasm              | other                 |
| ID1099          | <b>CSN4</b> , MPI, BPNT1  | -1,207             | -1,650              | -1,358              | -1,043            | -1,325            | -1,217            | COPS4                    | COP9 constitutive photomorphogenic homolog subunit 4 (Arabidopsis)                      | cytoplasm              | other                 |
| ID1723          | CTO77                     | 1,204              | -1,088              | 1,356               | -10,709           | -1,613            | -1,412            |                          |                                                                                         |                        |                       |
| ID327583        | DC1I2                     | -1,107             | -1,276              | -1,136              | -1,004            | -1,380            | -1,494            | DYNC1I2                  | dynein, cytoplasmic 1, intermediate chain 2                                             | cytoplasm              | other                 |
| ID650           | DC1I2                     | -1,344             | -1,510              | -1,390              | -2,099            | -1,941            | -1,840            | DYNC1I2                  | dynein, cytoplasmic 1, intermediate chain 2                                             | cytoplasm              | other                 |
| ID586647        | <b>DC1L2</b> , TCPB       | -1,157             | -1,250              | -1,222              | -3,496            | -1,515            | -1,312            | DYNC1L2                  | dynein, cytoplasmic 1, light intermediate chain 2                                       | cytoplasm              | other                 |
| ID380472        | DCTN1                     | 2,463              | 3,956               | 2,725               | 4,295             | 7,157             | 6,670             | DCTN1                    | dynactin 1                                                                              | cytoplasm              | other                 |
| ID302775        | <b>DCTN2</b> , PABP2      | -1,528             | -1,715              | -1,602              | -1,370            | -1,430            | -1,362            | DCTN2                    | dynactin 2 (p50)                                                                        | cytoplasm              | other                 |
| ID3348523       | DCUP                      | -1,512             | -1,856              | -1,560              | -1,986            | -1,176            | -1,512            | UROD                     | uroporphyrinogen decarboxylase                                                          |                        |                       |
| ID902           | <b>DD19A</b> , MPPA       | -1,185             | -1,373              | -1,200              | -4,435            | -1,880            | -1,788            | DDX19A                   | DEAD (Asp-Glu-Ala-As) box polypeptide 19A                                               | nucleus                | enzyme                |
| ID893           | <b>DD19A</b> , TBG1       | -1,387             | -1,522              | -1,469              | -6,156            | -1,398            | -1,223            | DDX19A                   | DEAD (Asp-Glu-Ala-As) box polypeptide 19A                                               | nucleus                | enzyme                |
| ID1259          | <b>DDAH1</b> , CAZA1      | -1,560             | -1,476              | -1,635              | 1,093             | -1,109            | -1,066            | DDAH1                    | dimethylarginine dimethylaminohydrolase 1                                               | cytoplasm              | enzyme                |
| ID129069        | DDB1                      | 1,161              | 1,238               | 1,010               | -1,131            | -1,211            | -1,501            | DDB1                     | DNA damage-binding protein 1                                                            | nucleus                |                       |
| ID436           | <b>DDB1</b> , OXRP        | -1,063             | -1,089              | -1,277              | -1,651            | -1,534            | -1,460            | DDB1                     | DNA damage-binding protein 1                                                            | nucleus                |                       |
| ID1169          | <b>DJB11</b> , ROAA       | -1,323             | -1,345              | -1,535              | -1,291            | -1,364            | -1,221            | DNAJB11                  | DnaJ homolog subfamily B member 11                                                      | ER                     |                       |
| ID983           | <b>DNJA2</b> , APMAP      | -1,062             | -1,307              | -1,146              | -1,524            | -1,472            | -1,391            | DNAJA2                   | DnaJ (Hsp40) homolog, subfamily A, member 2                                             | nucleus                | enzyme                |
| ID445851        | <b>DNJA2</b> , APMAP      | -1,179             | -1,502              | -1,358              | -1,354            | -1,218            | -1,258            | DNAJA2                   | DnaJ (Hsp40) homolog, subfamily A, member 2                                             | nucleus                | enzyme                |
| ID1319          | DNJC9                     | -1,547             | -1,559              | -1,693              | -2,179            | -1,419            | -1,462            | DNAJC9                   | DnaJ homolog subfamily C member 9                                                       | nucleus                | enzyme                |
| ID122740        | DP13B                     | -1,107             | -1,509              | -1,368              | 4,097             | 1,655             | 1,323             | APPL2                    | adaptor protein, phosphotyrosine interaction, PH domain and leucine zipper containing 2 | cytoplasm              | other                 |
| ID13335         | DPD2                      | -1,007             | -1,070              | 1,261               | -2,381            | -2,027            | -2,188            | POLD2                    | polymerase (DNA directed), delta 2, regulatory subunit 50kDa                            | nucleus                | enzyme                |
| ID410           | DPD2                      | -1,743             | -3,027              | -2,984              | -4,523            | -3,201            | -2,521            | POLD2                    | polymerase (DNA directed), delta 2, regulatory subunit 50kDa                            | nucleus                | enzyme                |
| ID244116        | DPD2                      | -1,920             | -3,462              | -4,204              | -5666,230         | -11,607           | -4,932            | POLD2                    | polymerase (DNA directed), delta 2, regulatory subunit 50kDa                            | nucleus                | enzyme                |
| ID755           | DPYL2                     | 1,839              | 2,897               | 2,284               | 3,639             | 3,796             | 2,655             | DPYSL2                   | dihydropyrimidinase-related protein 2                                                   | cytoplasm              | enzyme                |
| ID778           | <b>DPYL2</b> , LKHA4      | -1,231             | -1,565              | -1,260              | -9,398            | -1,331            | -1,173            | DPYSL2                   | dihydropyrimidinase-related protein 2                                                   | cytoplasm              | enzyme                |
| ID644           | <b>DPYL2</b> , ZYX, EZRI  | -1,228             | -1,429              | -1,336              | 1,918             | -1,242            | -1,166            | DPYSL2                   | dihydropyrimidinase-related protein 2                                                   | cytoplasm              | enzyme                |
| ID435           | DREB                      | -1,431             | -2,097              | -1,672              | -2,045            | -1,497            | -1,480            | DBN1                     | drebrin 1                                                                               | cytoplasm              | other                 |
| ID381           | DYNA                      | -1,646             | -2,086              | -1,799              | -2,423            | -1,838            | -2,020            | DCTN1                    | dynactin 1                                                                              | cytoplasm              | other                 |
| ID1352          | <b>ECH1</b> , PSDE        | 1,095              | -1,015              | 1,035               | -1,582            | -1,402            | -1,934            | ECH1                     | enoyl CoA hydratase 1, peroxisomal                                                      | cytoplasm              | enzyme                |
| ID1435          | ECHM                      | -1,103             | -1,141              | 1,029               | -1,953            | -1,620            | -1,784            | ECHS1                    | enoyl CoA hydratase, short chain, 1, mitochondrial                                      | cytoplasm              | enzyme                |
| ID1382          | EF1B                      | -1,145             | -1,518              | -1,228              | -1,187            | -1,231            | -1,031            | EEF1B2                   | elongation factor 1-beta                                                                | cytoplasm              | enzyme                |
| ID1278          | EF1D                      | -1,085             | -1,529              | -1,133              | 1,019             | -1,196            | -1,181            | EEF1D                    | elongation factor 1-delta                                                               | nucleus                | enzyme                |
| ID546           | EF2                       | -1,128             | -1,708              | -1,465              | -1,266            | -1,223            | -1,365            | EEF2                     | elongation factor 2                                                                     | nucleus                | enzyme                |
| ID610           | EGF1                      | -1,140             | -1,396              | -1,329              | -3,806            | -1,509            | -1,450            | GFM1                     | elongation factor G, mitochondrial                                                      | mitochondrion          | enzyme                |
| ID1128          | <b>EI2BL</b> , CAPG       | -1,645             | -1,868              | -1,453              | -1,905            | -1,553            | -1,416            |                          |                                                                                         |                        |                       |

Table S-2

| ID <sup>1</sup> | Protein <sup>2</sup> | 0 min <sup>3</sup> | 30 min <sup>3</sup> | 60 min <sup>3</sup> | 24 h <sup>3</sup> | 48 h <sup>3</sup> | 72 h <sup>3</sup> | IPA symbol <sup>14</sup> | Entrez gene name <sup>15</sup>                                | location <sup>16</sup> | type(s) <sup>17</sup> |
|-----------------|----------------------|--------------------|---------------------|---------------------|-------------------|-------------------|-------------------|--------------------------|---------------------------------------------------------------|------------------------|-----------------------|
| ID1078          | EIF3G, ARP3          | -1,200             | -1,324              | -1,225              | -1,725            | -1,594            | -1,371            | EIF3G                    | eukaryotic translation initiation factor 3, subunit G         | cytoplasm              | translation regulator |
| ID1913428       | ELOB                 | -1,268             | -1,514              | -1,485              | -5,265            | -2,730            | -4,564            | ELOB                     | elongin-B                                                     | nucleus                |                       |
| ID1015          | ENOA                 | 2,143              | 3,336               | 2,280               | 3,541             | 3,430             | 2,521             | ENO1                     | enolase 1, (alpha)                                            | cytoplasm              | enzyme                |
| ID1001          | ENOG                 | -1,860             | -1,771              | -1,620              | -1,812            | -1,564            | -1,592            | ENO2                     | enolase 2 (gamma, neuronal)                                   | cytoplasm              | enzyme                |
| ID15652         | ENOG                 | -2,058             | -1,952              | -1,877              | -1,514            | -1,413            | -1,526            | ENO2                     | enolase 2 (gamma, neuronal)                                   | cytoplasm              | enzyme                |
| ID953           | ENOG, RBBP7          | -1,091             | -1,292              | -1,118              | -1,826            | -1,546            | -1,615            | ENO2                     | enolase 2 (gamma, neuronal)                                   | cytoplasm              | enzyme                |
| ID274688        | ENPL                 | 1,215              | 1,296               | 1,260               | 1,792             | 1,114             | -1,211            | HSP90B1                  | endoplasmic reticulum protein 29                              | cytoplasm              | other                 |
| ID132924        | ENPL                 | 2,025              | -1,086              | 2,471               | -1,212            | -1,414            | -1,530            | HSP90B1                  | endoplasmic reticulum protein 29                              | cytoplasm              | other                 |
| ID104582        | ENPL                 | -1,154             | -1,624              | -1,133              | 1,074             | -1,253            | -1,380            | HSP90B1                  | endoplasmic reticulum protein 29                              | cytoplasm              | other                 |
| ID2298466       | ERP29, IF4E          | -1,254             | -1,534              | -1,363              | -2,225            | -1,367            | 2,181             | ERP29                    | endoplasmic reticulum protein 29                              | cytoplasm              | transporter           |
| ID1463          | ERP29, TPIS          | -1,733             | -1,650              | -1,478              | -1,693            | -1,319            | -1,286            | ERP29                    | endoplasmic reticulum protein 29                              | cytoplasm              | transporter           |
| ID625           | EZR, CALD1, SYK      | -1,339             | -1,593              | -1,375              | 2,136             | -1,299            | -1,298            | EZR                      | ezrin                                                         | plasma membrane        | other                 |
| ID191574        | FKB10                | -1,317             | -1,678              | -1,272              | -1,364            | -1,508            | -1,242            | FKBP10                   | peptidyl-prolyl cis-trans isomerase FKBP10                    | ER                     | enzyme                |
| ID387435        | FKB10                | -1,145             | -1,758              | -1,536              | -1,547            | -1,504            | -1,934            | FKBP10                   | peptidyl-prolyl cis-trans isomerase FKBP10                    | ER                     | enzyme                |
| ID643           | FKBP10, DC1I2        | -1,353             | -1,510              | -1,331              | -1,142            | -1,163            | -1,233            | FKBP10                   | peptidyl-prolyl cis-trans isomerase FKBP10                    | ER                     | enzyme                |
| ID871           | FKBP4                | -1,643             | -1,997              | -1,633              | -1,389            | -1,284            | -1,266            | FKBP4                    | FK506 binding protein 4, 59kDa                                | nucleus                | enzyme                |
| ID878           | FKBP4, HMCS1         | -1,433             | -1,901              | -1,521              | -1,427            | -1,256            | -1,135            | FKBP4                    | FK506 binding protein 4, 59kDa                                | nucleus                | enzyme                |
| ID692           | FKBP9                | 1,556              | 1,236               | 1,561               | -1,083            | -1,070            | -2,544            | FKBP9                    | FK506 binding protein 9, 63 kDa                               | cytoplasm              | enzyme                |
| ID1173          | FSTL1, ANXA2         | 1,221              | -1,742              | 1,779               | -1,056            | -1,588            | -1,581            | FSTL1                    | foliostatin-related protein 1                                 | extracellular space    |                       |
| ID1137          | GALK1, ILEU          | 1,175              | -1,186              | -1,170              | -7,085            | -1,655            | -1,734            | GALK1                    | galactokinase 1                                               | cytoplasm              | kinase                |
| ID1087          | GALK1, ILEU          | 1,046              | -1,101              | 1,035               | -4,583            | -1,080            | -1,199            | GALK1                    | galactokinase 1                                               | cytoplasm              | kinase                |
| ID509           | GANAB                | -1,042             | -1,127              | -1,107              | -1,257            | -1,671            | -2,510            | GANAB                    | glucosidase, alpha; neutral AB                                | cytoplasm              | enzyme                |
| ID496           | GANAB                | -1,169             | -1,235              | -1,135              | -1,428            | -1,772            | -2,132            | GANAB                    | glucosidase, alpha; neutral AB                                | cytoplasm              | enzyme                |
| ID460138        | GANAB                | -1,116             | -1,619              | -1,651              | -4,108            | -2,141            | -2,197            | GANAB                    | glucosidase, alpha; neutral AB                                | cytoplasm              | enzyme                |
| ID4596          | GANAB                | -2,305             | -2,293              | -1,970              | -2,060            | -1,877            | -1,768            | GANAB                    | glucosidase, alpha; neutral AB                                | cytoplasm              | enzyme                |
| ID510           | GANAB, IMMT          | -1,426             | -1,437              | -1,484              | -2,246            | -1,941            | -2,248            | GANAB                    | glucosidase, alpha; neutral AB                                | cytoplasm              | enzyme                |
| ID499           | GANAB, IMMT          | -1,143             | -1,441              | -1,258              | -1,445            | -1,692            | -2,071            | GANAB                    | glucosidase, alpha; neutral AB                                | cytoplasm              | enzyme                |
| ID825           | GDIA, ANXA3          | 1,200              | 1,992               | 1,379               | 1,880             | 1,542             | 1,318             | GDI1                     | GDP dissociation inhibitor 1                                  | cytoplasm              | other                 |
| ID828           | GDIA, VTDB           | 1,567              | 3,029               | 1,842               | 2,929             | 2,413             | 2,064             | GDI1                     | GDP dissociation inhibitor 1                                  | cytoplasm              | other                 |
| ID940           | GDI1B                | -2,375             | -2,315              | -2,131              | -2,001            | -1,854            | -1,588            | GDI2                     | GDP dissociation inhibitor 2                                  | cytoplasm              | other                 |
| ID1513          | GDIR1, LGUL          | -1,677             | -1,722              | -1,411              | -1,418            | -1,387            | -1,413            | ARHGDI1A                 | Rho GDP-dissociation inhibitor 1                              |                        |                       |
| ID17482         | GELS                 | 1,193              | 1,458               | 1,482               | 1,814             | 1,442             | -1,496            | GSN                      | gelsolin                                                      | extracellular space    | other                 |
| ID584           | GELS, MX1            | -1,174             | -1,320              | -1,281              | -2,474            | -1,459            | -1,685            | GSN                      | gelsolin                                                      | extracellular space    | other                 |
| ID1167          | GLRX3, TXNL2         | -1,758             | -1,966              | -1,622              | -1,649            | -1,439            | -1,344            | GLRX3                    | glutaredoxin 3                                                | cytoplasm              | enzyme                |
| ID3296127       | GMFB                 | -1,473             | -1,738              | -1,515              | -1,589            | -1,059            | 1,071             | GMFB                     | glia maturation factor beta                                   |                        |                       |
| ID505           | GRAP1, GANAB         | -1,219             | -1,270              | -1,272              | -2,259            | -1,877            | -2,369            | GRIPAP1                  | GRIP1 associated protein 1                                    | plasma membrane        | other                 |
| ID309937        | GRAP1, GANAB         | -3,194             | -9,644              | -7,798              | -3,002            | -1,767            | -1,551            | GRIPAP1                  | GRIP1 associated protein 1                                    | plasma membrane        | other                 |
| ID2845794       | GRP78 (BIP)          | 1,191              | 1,783               | 1,101               | 1,500             | -1,017            | -1,157            | HSPA5                    | heat shock 70kDa protein 5 (glucose-regulated protein, 78kDa) | cytoplasm              | other                 |
| ID3760          | GRP78 (BIP)          | 1,728              | 1,717               | 1,314               | 5,797             | 2,933             | 2,553             | HSPA5                    | heat shock 70kDa protein 5 (glucose-regulated protein, 78kDa) | cytoplasm              | other                 |
| ID594           | GRP78 (BIP)          | 1,538              | 1,540               | 1,303               | 1,250             | 1,176             | -1,272            | HSPA5                    | heat shock 70kDa protein 5 (glucose-regulated protein, 78kDa) | cytoplasm              | other                 |
| ID672           | GRP78 (BIP)          | 1,455              | 1,523               | 1,202               | 1,283             | -1,214            | -1,283            | HSPA5                    | heat shock 70kDa protein 5 (glucose-regulated protein, 78kDa) | cytoplasm              | other                 |
| ID661           | GRP78 (BIP)          | 1,267              | 1,365               | 1,097               | 2,845             | 1,740             | 1,667             | HSPA5                    | heat shock 70kDa protein 5 (glucose-regulated protein, 78kDa) | cytoplasm              | other                 |
| ID662           | GRP78 (BIP)          | 1,044              | 1,259               | -1,010              | 1,918             | 1,216             | 1,264             | HSPA5                    | heat shock 70kDa protein 5 (glucose-regulated protein, 78kDa) | cytoplasm              | other                 |
| ID2846419       | GRP78 (BIP)          | 1,114              | 1,067               | -1,754              | 1,031             | -1,348            | -1,647            | HSPA5                    | heat shock 70kDa protein 5 (glucose-regulated protein, 78kDa) | cytoplasm              | other                 |
| ID366771        | GRP78 (BIP)          | 2,071              | 1,056               | 2,126               | -1,739            | -1,636            | -4,240            | HSPA5                    | heat shock 70kDa protein 5 (glucose-regulated protein, 78kDa) | cytoplasm              | other                 |
| ID10719         | GRP78 (BIP)          | 2,064              | -2,767              | 2,955               | 2,056             | -1,108            | 1,290             | HSPA5                    | heat shock 70kDa protein 5 (glucose-regulated protein, 78kDa) | cytoplasm              | other                 |
| ID318           | GRP78 (BIP)          | -2,963             | -3,015              | -51,057             | -4,716            | -2,194            | -2,229            | HSPA5                    | heat shock 70kDa protein 5 (glucose-regulated protein, 78kDa) | cytoplasm              | other                 |
| ID105671        | GRP78 (BIP), ENPL    | -1,448             | 1,248               | -1,590              | 1,161             | -1,102            | 1,194             | HSPA5                    | heat shock 70kDa protein 5 (glucose-regulated protein, 78kDa) | cytoplasm              | other                 |
| ID120878        | GRP78 (BIP), PDIA4   | 1,893              | -1,051              | 1,250               | -1,248            | -1,085            | -1,698            | HSPA5                    | heat shock 70kDa protein 5 (glucose-regulated protein, 78kDa) | cytoplasm              | other                 |
| ID960           | GSHB                 | -1,668             | -1,781              | -1,606              | -1,397            | -1,351            | -1,364            | GSS                      | glutathione synthetase                                        | cytoplasm              | enzyme                |
| ID943           | GSHB, K2C8           | -1,189             | -1,842              | -1,916              | -1,989            | -1,659            | -1,746            | GSS                      | glutathione synthetase                                        | cytoplasm              | enzyme                |
| ID622           | GSPT1, HS90A         | -1,902             | -2,226              | -1,833              | -1,951            | -1,556            | -1,281            | GSPT1                    | G1 to S phase transition 1                                    | cytoplasm              | translation regulator |
| ID1408          | GSTO1, ERP29         | 1,000              | -1,176              | 1,063               | -7,525            | -1,336            | -1,493            | GSTO1                    | glutathione S-transferase omega 1                             | cytoplasm              | enzyme                |
| ID422947        | GSTO1, PSB7          | -1,187             | -1,432              | -1,293              | -1,575            | -1,635            | -1,430            | GSTO1                    | glutathione S-transferase omega 1                             | cytoplasm              | enzyme                |
| ID1516          | GSTP1                | -1,790             | -1,644              | -1,508              | -1,481            | -1,463            | -1,474            | GSTP1                    | glutathione S-transferase pi 1                                | cytoplasm              | enzyme                |
| ID1194          | HDGF                 | -1,702             | -1,789              | -1,566              | -1,872            | -1,487            | -1,686            | HDGF                     | hepatoma-derived growth factor                                | extracellular space    | growth factor         |
| ID88373         | HDGF                 | -1,824             | -1,933              | -1,655              | -2,274            | -1,494            | -1,820            | HDGF                     | hepatoma-derived growth factor                                | extracellular space    | growth factor         |
| ID1211          | HDGF                 | -1,613             | -2,007              | -1,561              | -2,324            | -1,573            | -2,050            | HDGF                     | hepatoma-derived growth factor                                | extracellular space    | growth factor         |
| ID1231          | HDGF                 | -2,296             | -2,249              | -1,824              | -1,828            | -1,135            | -1,120            | HDGF                     | hepatoma-derived growth factor                                | extracellular space    | growth factor         |

Table S-2

| ID <sup>1</sup> | Protein <sup>2</sup>     | 0 min <sup>3</sup> | 30 min <sup>3</sup> | 60 min <sup>3</sup> | 24 h <sup>3</sup> | 48 h <sup>3</sup> | 72 h <sup>3</sup> | IPA symbol <sup>14</sup> | Entrez gene name <sup>15</sup>                                           | location <sup>16</sup> | type(s) <sup>17</sup> |
|-----------------|--------------------------|--------------------|---------------------|---------------------|-------------------|-------------------|-------------------|--------------------------|--------------------------------------------------------------------------|------------------------|-----------------------|
| ID217409        | HEXB                     | 1,248              | 1,301               | 1,200               | -1,064            | -1,391            | -1,494            | HEXB                     | beta-hexosaminidase subunit beta                                         | lysosome               | enzyme                |
| ID447263        | <b>HNRH1</b> , CNDP2     | -1,005             | 1,146               | 1,038               | -1,639            | -1,889            | -1,454            | HNRNPH1                  | heterogeneous nuclear ribonucleoprotein H1 (H)                           | nucleus                | other                 |
| ID923           | <b>HNRH1</b> , CNDP2     | 1,082              | -1,137              | -1,199              | -1,769            | -1,885            | -1,976            | HNRNPH1                  | heterogeneous nuclear ribonucleoprotein H1 (H)                           | nucleus                | other                 |
| ID918           | <b>HNRH1</b> , CNDP2     | -1,024             | -1,516              | -1,646              | -1,973            | -1,643            | -1,606            | HNRNPH1                  | heterogeneous nuclear ribonucleoprotein H1 (H)                           | nucleus                | other                 |
| ID971           | <b>HNRH1</b> , GDIB      | -1,383             | -1,524              | -1,463              | -1,726            | -1,433            | -1,458            | HNRNPH1                  | heterogeneous nuclear ribonucleoprotein H1 (H)                           | nucleus                | other                 |
| ID29521         | <b>HNRH1</b> , HNRH2     | -1,140             | -1,642              | -1,634              | -2,072            | -1,661            | -1,662            | HNRNPH1                  | heterogeneous nuclear ribonucleoprotein H1 (H)                           | nucleus                | other                 |
| ID471051        | <b>HNRH1</b> , TIF1B     | -1,201             | -1,450              | -1,408              | -4,109            | -1,549            | -1,527            | HNRNPH1                  | heterogeneous nuclear ribonucleoprotein H1 (H)                           | nucleus                | other                 |
| ID457           | HNRL2                    | -1,077             | -1,935              | -1,864              | -3,319            | -2,198            | -2,203            | HNRNPUL2                 | heterogeneous nuclear ribonucleoprotein U-like 2                         | nucleus                | other                 |
| ID458           | HNRL2                    | -1,252             | -2,150              | -1,846              | -2,943            | -1,975            | -1,988            | HNRNPUL2                 | heterogeneous nuclear ribonucleoprotein U-like 2                         | nucleus                | other                 |
| ID441           | HNRL2                    | -1,302             | -2,275              | -1,952              | -2,842            | -2,082            | -2,069            | HNRNPUL2                 | heterogeneous nuclear ribonucleoprotein U-like 2                         | nucleus                | other                 |
| ID493           | HNRL2                    | -2,017             | -5,598              | -3,182              | -2,519            | -1,318            | -1,086            | HNRNPUL2                 | heterogeneous nuclear ribonucleoprotein U-like 2                         | nucleus                | other                 |
| ID1203          | HNRPC                    | -2,187             | -2,831              | -2,453              | -1,578            | -1,410            | -1,498            | HNRNPC                   | heterogeneous nuclear ribonucleoprotein C (C1/C2)                        | nucleus                | other                 |
| ID2964442       | <b>HNRPC</b> , STRAP     | -2,734             | -6,509              | -3,687              | -1,654            | -1,352            | 1,290             | HNRNPC                   | heterogeneous nuclear ribonucleoprotein C (C1/C2)                        | nucleus                | other                 |
| ID305540        | <b>HNRPC</b> , STRAP     | -3,169             | -7,618              | -4,172              | 1,184             | -1,661            | 1,271             | HNRNPC                   | heterogeneous nuclear ribonucleoprotein C (C1/C2)                        | nucleus                | other                 |
| ID770           | HNRPK                    | 1,732              | 3,238               | 1,844               | 3,799             | 3,875             | 2,844             | HNRNPK                   | heterogeneous nuclear ribonucleoprotein K                                | nucleus                | other                 |
| ID788           | HNRPK                    | -1,096             | -1,547              | -1,466              | -1,243            | -1,139            | -1,357            | HNRNPK                   | heterogeneous nuclear ribonucleoprotein K                                | nucleus                | other                 |
| ID797           | <b>HNRPK</b> , HSP7C     | 1,173              | -1,257              | -1,413              | -1,238            | -1,183            | -1,526            | HNRNPK                   | heterogeneous nuclear ribonucleoprotein K                                | nucleus                | other                 |
| ID879           | <b>HNRPK</b> , TBL1R     | -1,743             | -2,090              | -1,471              | -1,712            | -1,821            | -1,833            | HNRNPK                   | heterogeneous nuclear ribonucleoprotein K                                | nucleus                | other                 |
| ID391           | HNRPV                    | -1,147             | -1,457              | -1,284              | -1,692            | -1,852            | -1,567            | HNRNPU                   | heterogeneous nuclear ribonucleoprotein U (scaffold attachment factor A) | nucleus                | transporter           |
| ID447           | HNRPV                    | -1,207             | -1,668              | -1,568              | -2,287            | -1,590            | -2,032            | HNRNPU                   | heterogeneous nuclear ribonucleoprotein U (scaffold attachment factor A) | nucleus                | transporter           |
| ID415           | <b>HNRPV</b> , PPCE      | -1,443             | -2,069              | -1,790              | -1,449            | -2,384            | -2,673            | HNRPV                    | heterogeneous nuclear ribonucleoprotein U (scaffold attachment factor A) | nucleus                | transporter           |
| ID446           | <b>HNRPV</b> , PPCE      | -1,824             | -4,034              | -2,288              | -3,004            | -2,739            | -2,536            | HNRPV                    | heterogeneous nuclear ribonucleoprotein U (scaffold attachment factor A) | nucleus                | transporter           |
| ID485           | HS105                    | -1,673             | -2,108              | -1,905              | -1,788            | -1,412            | -1,194            | HSPH1                    | heat shock 105kDa/110kDa protein 1                                       | cytoplasm              | other                 |
| ID486           | HS105                    | -1,745             | -2,173              | -1,897              | -1,845            | -1,491            | -1,200            | HSPH1                    | heat shock 105kDa/110kDa protein 1                                       | cytoplasm              | other                 |
| ID477           | <b>HS105</b> , GPIA1     | -1,503             | -1,939              | -1,791              | -1,755            | -1,553            | -1,288            | HSPH1                    | heat shock 105kDa/110kDa protein 1                                       | cytoplasm              | other                 |
| ID628           | HS90A                    | 1,566              | 2,089               | 1,576               | 2,364             | 2,620             | 1,639             | HSP90AA1                 | heat shock protein 90kDa alpha (cytosolic), class A member 1             | cytoplasm              | other                 |
| ID20414         | HS90A                    | 1,299              | 1,624               | 1,349               | 1,446             | 2,009             | 1,520             | HSP90AA1                 | heat shock protein 90kDa alpha (cytosolic), class A member 1             | cytoplasm              | other                 |
| ID596190        | HS90A                    | 1,473              | 1,049               | -1,190              | 1,740             | 1,269             | -1,517            | HSP90AA1                 | heat shock protein 90kDa alpha (cytosolic), class A member 1             | cytoplasm              | other                 |
| ID623           | HS90A                    | -1,158             | -1,309              | -1,251              | -1,641            | -1,400            | -1,652            | HSP90AA1                 | heat shock protein 90kDa alpha (cytosolic), class A member 1             | cytoplasm              | other                 |
| ID3841          | HS90A                    | -1,086             | -1,638              | -1,549              | 1,075             | -1,020            | -1,230            | HSP90AA1                 | heat shock protein 90kDa alpha (cytosolic), class A member 1             | cytoplasm              | other                 |
| ID575           | HS90A                    | -1,595             | -1,959              | -1,476              | -1,626            | -1,622            | -1,171            | HSP90AA1                 | heat shock protein 90kDa alpha (cytosolic), class A member 1             | cytoplasm              | other                 |
| ID573           | HS90A                    | -1,630             | -2,379              | -1,655              | -1,630            | -1,539            | -1,078            | HSP90AA1                 | heat shock protein 90kDa alpha (cytosolic), class A member 1             | cytoplasm              | other                 |
| ID3931          | HS90A                    | -1,940             | -2,689              | -1,984              | -1,158            | 1,117             | -1,003            | HSP90AA1                 | heat shock protein 90kDa alpha (cytosolic), class A member 1             | cytoplasm              | other                 |
| ID571           | HS90A                    | -1,849             | -2,705              | -2,140              | -1,739            | -1,763            | -1,347            | HSP90AA1                 | heat shock protein 90kDa alpha (cytosolic), class A member 1             | cytoplasm              | other                 |
| ID10923         | HS90A                    | -1,793             | -3,154              | -1,846              | -1,746            | -1,821            | -1,353            | HSP90AA1                 | heat shock protein 90kDa alpha (cytosolic), class A member 1             | cytoplasm              | other                 |
| ID559           | <b>HS90A</b> , DP13A     | -1,655             | -2,444              | -1,829              | -1,716            | -1,877            | -1,390            | HSP90AA1                 | heat shock protein 90kDa alpha (cytosolic), class A member 1             | cytoplasm              | other                 |
| ID2816455       | <b>HS90A</b> , HS90B     | -1,515             | -1,669              | -1,496              | -1,221            | -1,310            | 1,075             | HSP90AA1                 | heat shock protein 90kDa alpha (cytosolic), class A member 1             | cytoplasm              | other                 |
| ID574           | <b>HS90A</b> , HS90B     | -2,347             | -2,683              | -2,149              | -1,443            | -1,576            | -1,104            | HSP90AA1                 | heat shock protein 90kDa alpha (cytosolic), class A member 1             | cytoplasm              | other                 |
| ID627           | HS90A, <b>MRE11</b>      | 1,352              | 1,713               | 1,449               | 1,518             | 1,925             | 1,330             | MRE11                    | double-strand break repair protein MRE11                                 |                        |                       |
| ID1703          | HSB11                    | -1,530             | -1,487              | -1,349              | -1,211            | -1,249            | -1,098            | HSPB11                   | heat shock protein family B (small), member 11                           | unknown                | other                 |
| ID717           | <b>HSP71</b> , PDIA4     | 1,880              | 2,565               | 1,756               | 3,420             | 3,713             | 2,431             | HS71A                    | Heat shock 70 kDa protein 1A                                             |                        |                       |
| ID490           | HSP74                    | -1,733             | -2,057              | -1,758              | -1,766            | -1,401            | -1,306            | HSPA4                    | heat shock 70kDa protein 4                                               | cytoplasm              | other                 |
| ID491           | HSP74                    | -1,954             | -2,277              | -1,913              | -2,037            | -1,590            | -1,242            | HSPA4                    | heat shock 70kDa protein 4                                               | cytoplasm              | other                 |
| ID822           | <b>HSP7C</b> , AINX      | -1,063             | -1,438              | -1,397              | -1,497            | -1,379            | -1,144            | HSPA8                    | heat shock 70kDa protein 8                                               | cytoplasm              | enzyme                |
| ID1455          | HSPB1                    | -1,124             | 1,907               | -1,107              | -1,376            | -1,040            | 1,225             | HSPB1                    | heat shock 27kDa protein 1                                               | cytoplasm              | other                 |
| ID1453          | <b>HSPB1</b> , ECHM      | -1,359             | -1,840              | -1,194              | -18,720           | -1,239            | -1,303            | HSPB1                    | heat shock 27kDa protein 1                                               | cytoplasm              | other                 |
| ID376           | HYOU1                    | 1,053              | -1,027              | 1,038               | 1,908             | 1,081             | -1,152            | HYOU1                    | hypoxia up-regulated 1                                                   | cytoplasm              | other                 |
| ID5403          | HYOU1                    | -1,671             | -2,450              | -1,853              | -2,487            | -1,747            | -1,333            | HYOU1                    | hypoxia up-regulated 1                                                   | cytoplasm              | other                 |
| ID5526          | HYOU1                    | -1,911             | -2,708              | -1,916              | -2,749            | -1,902            | -1,505            | HYOU1                    | hypoxia up-regulated 1                                                   | cytoplasm              | other                 |
| ID430           | ICAL                     | -1,411             | -1,520              | -1,304              | -1,668            | -1,357            | -1,543            | CAST                     | calpastatin                                                              | cytoplasm              | peptidase             |
| ID427           | ICAL                     | -1,395             | -1,605              | -1,247              | -1,724            | -1,383            | -1,552            | CAST                     | calpastatin                                                              | cytoplasm              | peptidase             |
| ID126195        | ICAL                     | -1,509             | -1,700              | -1,291              | -1,524            | -1,392            | -1,619            | CAST                     | calpastatin                                                              | cytoplasm              | peptidase             |
| ID475           | ICAL                     | -1,583             | -2,105              | -1,422              | -2,601            | -1,539            | -1,587            | CAST                     | calpastatin                                                              | cytoplasm              | peptidase             |
| ID428           | <b>ICAL</b> , DREB       | -1,480             | -1,951              | -1,474              | -1,914            | -1,484            | -1,437            | CAST                     | calpastatin                                                              | cytoplasm              | peptidase             |
| ID1174          | IDH3A                    | -1,409             | -1,886              | -1,487              | -1,646            | -1,076            | -1,295            | IDH3A                    | isocitrate dehydrogenase 3 (NAD+) alpha                                  | cytoplasm              | enzyme                |
| ID1458          | <b>IDH1</b> , PSB10      | -1,700             | -1,669              | -1,657              | -1,358            | -1,604            | -1,684            | IDI1                     | isopentenyl-diphosphate Delta-isomerase 1                                | cytoplasm              | enzyme                |
| ID3591281       | <b>IF1AX</b> , SORCN     | -1,147             | -1,187              | -1,129              | -2,866            | -1,131            | -1,579            | EIF1AX                   | eukaryotic translation initiation factor 1A, X-chromosomal               | cytoplasm              | translation regulator |
| ID1196          | IF2A                     | -1,445             | -1,724              | -1,562              | -1,716            | -1,480            | -1,338            | EIF2S1                   | eukaryotic translation initiation factor 2, subunit 1 alpha, 35kDa       | cytoplasm              | translation regulator |
| ID964           | <b>IF2B</b> , ARP3, QCR1 | -1,009             | -1,216              | -1,114              | -1,601            | -1,605            | -1,605            | EIF2B1                   | translation initiation factor eIF-2B subunit alpha                       | cytoplasm              | translation regulator |

Table S-2

| ID <sup>1</sup> | Protein <sup>2</sup> | 0 min <sup>3</sup> | 30 min <sup>3</sup> | 60 min <sup>3</sup> | 24 h <sup>3</sup> | 48 h <sup>3</sup> | 72 h <sup>3</sup> | IPA symbol <sup>14</sup> | Entrez gene name <sup>15</sup>                                                             | location <sup>16</sup> | type(s) <sup>17</sup>  |
|-----------------|----------------------|--------------------|---------------------|---------------------|-------------------|-------------------|-------------------|--------------------------|--------------------------------------------------------------------------------------------|------------------------|------------------------|
| ID1240          | IF31, ANXA2          | -1,712             | -1,841              | -1,694              | -1,354            | -1,277            | -1,387            | EIF3J                    | eukaryotic translation initiation factor 3, subunit J                                      | cytoplasm              | translation regulator  |
| ID1019          | IF4A1, ACTG          | -1,572             | -2,000              | -1,685              | -1,158            | -1,232            | -1,075            | EIF4A1                   | eukaryotic translation initiation factor 4A1                                               | cytoplasm              | translation regulator  |
| ID13655         | IF4A1, NDRG3         | 1,237              | 1,006               | 1,223               | -1,375            | -1,441            | -1,715            | EIF4A1                   | eukaryotic translation initiation factor 4A1                                               | cytoplasm              | translation regulator  |
| ID617           | IF4B, NEBU           | -1,560             | -1,916              | -1,526              | -1,449            | -1,402            | -1,187            | EIF4B                    | eukaryotic translation initiation factor 4B                                                | cytoplasm              | translation regulator  |
| ID1697          | IF5A1                | -1,885             | -1,906              | -1,744              | -1,853            | -1,634            | -1,267            | EIF5A                    | eukaryotic translation initiation factor 5A                                                | cytoplasm              | translation regulator  |
| ID1465          | IF6                  | -1,392             | -1,548              | -1,227              | -1,440            | -1,194            | 1,021             | EIF-6                    | eukaryotic translation initiation factor 6                                                 | cytoplasm              | translation regulator  |
| ID1139          | ILEU, SCMC1          | -1,091             | -1,554              | -1,579              | -15,914           | -1,273            | -1,521            | SERPINB1                 | serpin peptidase inhibitor, clade B (ovalbumin), member 1                                  | cytoplasm              | other                  |
| ID3406          | IMA7                 | 1,112              | 1,801               | 1,128               | 1,392             | 1,167             | 1,073             | KPNA6                    | karyopherin alpha 6 (importin alpha 7)                                                     | nucleus                | transporter            |
| ID577           | IMMT, PLOD3          | -1,043             | -1,453              | -1,144              | -1,669            | -1,449            | -1,452            | IMMT                     | inner membrane protein, mitochondrial                                                      | cytoplasm              | other                  |
| ID1300          | IPYR                 | -1,594             | -1,593              | -1,275              | -1,349            | -1,230            | -1,380            | PPA1                     | pyrophosphatase (inorganic) 1                                                              | cytoplasm              | enzyme                 |
| ID1291          | IPYR, GBB1           | -1,793             | -1,776              | -1,385              | -1,413            | -1,434            | -1,249            | PPA1                     | pyrophosphatase (inorganic) 1                                                              | cytoplasm              | enzyme                 |
| ID195754        | ITA3                 | -1,161             | -1,234              | -1,201              | 1,396             | -1,354            | -1,531            | ITGA3                    | integrin, alpha 3 (antigen CD49C, alpha 3 subunit of VLA-3 receptor)                       | plasma membrane        | other                  |
| ID393           | ITA3                 | -1,065             | -1,304              | -1,202              | -1,058            | -1,566            | -1,652            | ITGA3                    | integrin, alpha 3 (antigen CD49C, alpha 3 subunit of VLA-3 receptor)                       | plasma membrane        | other                  |
| ID981           | K1C17                | 1,028              | -1,094              | -1,183              | -1,423            | -1,600            | -1,360            | KRT17                    | keratin 17                                                                                 | cytoplasm              | other                  |
| ID927           | K1C17, ATPB          | 1,409              | 1,249               | 1,503               | 1,256             | -1,079            | -1,243            | KRT17                    | keratin 17                                                                                 | cytoplasm              | other                  |
| ID1086          | K1C18, ACTB, NUP43   | 1,109              | 1,018               | 1,060               | -1,512            | -1,457            | -1,394            | K1C18                    | keratin 18                                                                                 | cytoplasm              | other                  |
| ID417           | K1C9                 | 1,335              | 2,192               | 1,520               | 3,040             | 3,191             | 1,552             | KRT9                     | keratin, type I cytoskeletal 9                                                             | cytoplasm              | other                  |
| ID899           | K2C8                 | 1,620              | 1,550               | 1,475               | 1,037             | 1,012             | -1,088            | KRT8                     | keratin 8                                                                                  | cytoplasm              | other                  |
| ID892           | K2C8                 | 1,661              | 1,500               | 1,468               | -1,048            | -1,133            | -1,356            | KRT8                     | keratin 8                                                                                  | cytoplasm              | other                  |
| ID959           | KAP0, TXND5          | -2,077             | -3,176              | -2,585              | -1,823            | -1,865            | -1,908            | PRKAR1A                  | protein kinase, cAMP-dependent, regulatory, type I, alpha (tissue specific extinguisher 1) | cytoplasm              | kinase                 |
| ID3670          | KAP2, IF4A1          | 1,053              | -1,202              | -1,011              | -2,010            | -1,751            | -1,513            | PRKAR2A                  | cAMP-dependent protein kinase type II-alpha regulatory subunit                             | cytoplasm              | kinase                 |
| ID556498        | KBP                  | 1,661              | 1,126               | 1,034               | 1,205             | 1,108             | -2,373            | KIF1BP                   | KIF1-binding protein                                                                       | cytoplasm              | other                  |
| ID207376        | KCRB                 | -1,018             | -1,322              | -1,696              | -1,391            | -1,709            | -2,673            | CKB                      | creatine kinase, brain                                                                     | cytoplasm              | kinase                 |
| ID3760270       | KU86                 | -1,446             | -1,650              | -1,586              | -1,977            | -1,486            | -1,482            | XRCC5                    | X-ray repair cross-complementing protein 5                                                 |                        |                        |
| ID629           | KU86, HS90A          | -1,370             | -1,505              | -1,516              | -1,680            | -1,599            | -1,616            | XRCC5                    | X-ray repair cross-complementing protein 5                                                 |                        |                        |
| ID618           | KU86, HS90A          | -1,366             | -1,764              | -1,645              | -1,827            | -1,614            | -1,774            | XRCC5                    | X-ray repair cross-complementing protein 5                                                 |                        |                        |
| ID1962730       | LEG1                 | -1,365             | -1,603              | -1,478              | -1,773            | -1,548            | 1,120             | LGALS1                   | galectin-1                                                                                 | extracellular space    | other                  |
| ID10509         | LG3BP                | -1,080             | -1,158              | 1,016               | 1,715             | 1,299             | 1,009             | LGALS3BP                 | lectin, galactoside-binding, soluble, 3 binding protein                                    | plasma membrane        | transmembrane receptor |
| ID777           | LKHA4                | -1,792             | -1,506              | -1,864              | -1,157            | -1,221            | -1,430            | LTA4H                    | leukotriene A4 hydrolase                                                                   | cytoplasm              | enzyme                 |
| ID765           | LMNA                 | 1,624              | 1,377               | 1,401               | -2,785            | -1,505            | -2,041            | LMNA                     | lamin A/C                                                                                  | nucleus                | other                  |
| ID490428        | LMNA, AGM1           | 1,535              | 1,328               | 1,328               | -11,225           | -1,235            | -1,097            | LMNA                     | lamin A/C                                                                                  | nucleus                | other                  |
| ID708           | LMNB1                | 1,678              | 1,245               | 1,722               | -1,172            | -1,445            | -2,197            | LMNB1                    | lamin B1                                                                                   | nucleus                | other                  |
| ID712           | LMNB1                | 1,411              | 1,184               | 1,333               | -1,532            | -1,284            | -2,137            | LMNB1                    | lamin B1                                                                                   | nucleus                | other                  |
| ID709           | LMNB1                | 1,102              | 1,127               | -1,021              | -1,361            | -1,391            | -1,833            | LMNB1                    | lamin B1                                                                                   | nucleus                | other                  |
| ID537545        | LMNB1, TKT           | 2,107              | 1,123               | 2,427               | -1,180            | -1,462            | -2,650            | LMNB1                    | lamin B1                                                                                   | nucleus                | other                  |
| ID395           | LPPRC                | -1,307             | -1,596              | -1,459              | -1,390            | -1,824            | -1,636            | LRPPRC                   | leucine-rich PPR motif-containing protein, mitochondrial                                   | nucleus                | other                  |
| ID1308          | LZTL1, SFRS1         | -2,137             | -1,990              | -1,791              | -1,983            | -1,626            | -1,443            | LZTFL1                   | leucine zipper transcription factor-like 1                                                 | unknown                | other                  |
| ID691           | MAOX, SWP70          | 1,159              | 1,056               | 1,144               | 1,139             | 1,971             | 1,844             | ME1                      | malic enzyme 1, NADP(+)-dependent, cytosolic                                               |                        |                        |
| ID44539         | MARCS                | 1,536              | 1,880               | 1,586               | 1,491             | -1,235            | 1,157             | MARCKS                   | myristoylated alanine-rich protein kinase C substrate                                      | plasma membrane        | other                  |
| ID1355          | MARE1, EFHD2         | -1,634             | -1,800              | -1,446              | -1,321            | -1,350            | -1,255            | MAPRE1                   | microtubule-associated protein, RP/EB family, member 1                                     | cytoplasm              | other                  |
| ID1360          | MARE1, TBCB          | -1,527             | -1,651              | -1,378              | -1,292            | -1,321            | -1,329            | MAPRE1                   | microtubule-associated protein, RP/EB family, member 1                                     | cytoplasm              | other                  |
| ID409           | MATR3                | -1,265             | -1,558              | -1,423              | -1,104            | -1,588            | -1,928            | MATR3                    | Matrin-3                                                                                   | nucleus                | other                  |
| ID3316          | MCM6, 2AAA           | 1,757              | 3,200               | 1,927               | 3,851             | 3,545             | 2,668             | MCM6                     | DNA replication licensing factor MCM6                                                      | nucleus                | enzyme                 |
| ID585           | MD1L1, GELS          | -1,335             | -1,581              | -1,492              | -2,577            | -1,738            | -1,618            | MAD1L1                   | MAD1 mitotic arrest deficient-like 1 (yeast)                                               | nucleus                | other                  |
| ID663           | MEPD, THOP1          | -1,575             | -1,641              | -1,464              | -1,903            | -1,831            | -1,489            | THOP1                    | Thimet oligopeptidase                                                                      |                        |                        |
| ID1647          | MLRM                 | -1,049             | 1,069               | -1,100              | -1,912            | -1,851            | -1,729            | MYL12A                   | myosin regulatory light chain 12A                                                          |                        |                        |
| ID2669          | MLRM                 | -1,121             | -1,046              | -1,068              | -1,636            | -1,582            | -1,299            | MYL12A                   | myosin regulatory light chain 12A                                                          |                        |                        |
| ID1953484       | MLRN                 | 1,065              | 1,372               | 1,061               | -2,053            | -2,193            | -1,609            | MYL9                     | myosin regulatory light polypeptide 9                                                      |                        |                        |
| ID72360         | MLRN                 | -1,560             | -1,122              | -1,299              | -1,521            | -1,352            | -1,152            | MYL9                     | myosin regulatory light polypeptide 9                                                      |                        |                        |
| ID1041          | MP2K2                | -1,364             | -1,586              | -1,358              | -35,809           | -1,533            | -1,484            | MAP2K2                   | mitogen-activated protein kinase 2                                                         | cytoplasm              | kinase                 |
| ID1936868       | MRLC2                | 1,297              | -1,090              | -1,052              | -13,414           | -3,513            | -21,986           | MYL12B                   | myosin regulatory light chain 12B                                                          | cytoplasm              | other                  |
| ID508           | MSH2, GANAB          | -1,895             | -2,182              | -1,978              | -2,046            | -1,880            | -1,916            | MSH2                     | mutS homolog 2, colon cancer, nonpolyposis type 1 (E. coli)                                | nucleus                | enzyme                 |
| ID1630          | MTND, SSRD           | -1,618             | -1,477              | -1,024              | -1,159            | -1,310            | -1,426            | ADI1                     | acireductone dioxygenase 1                                                                 | nucleus                | enzyme                 |
| ID540509        | MVP                  | -1,319             | -1,375              | -1,463              | -1,953            | -1,588            | -1,585            | MVP                      | major vault protein                                                                        | nucleus                | other                  |
| ID487           | MVP                  | -1,505             | -1,738              | -1,899              | -2,011            | -1,700            | -1,626            | MVP                      | major vault protein                                                                        | nucleus                | other                  |
| ID460           | MVP, SYAC            | -2,117             | -2,305              | -2,111              | -2,572            | -1,911            | -1,700            | MVP                      | major vault protein                                                                        | nucleus                | other                  |
| ID7894          | MVP, TIF1B, MVP      | -1,364             | -1,617              | -1,463              | -1,872            | -1,478            | -1,568            | MVP                      | major vault protein                                                                        | nucleus                | other                  |
| ID197182        | MVP, UBA1            | -1,581             | -1,862              | -1,870              | -2,177            | -1,697            | -1,708            | MVP                      | major vault protein                                                                        | nucleus                | other                  |
| ID17545         | MX1                  | 1,001              | 1,557               | 1,237               | 1,308             | 1,296             | -1,849            | MX1                      | myxovirus (influenza virus) resistance 1, interferon-inducible protein p78 (mouse)         | nucleus                | enzyme                 |

Table S-2

| ID <sup>1</sup> | Protein <sup>2</sup> | 0 min <sup>3</sup> | 30 min <sup>3</sup> | 60 min <sup>3</sup> | 24 h <sup>3</sup> | 48 h <sup>3</sup> | 72 h <sup>3</sup> | IPA symbol <sup>14</sup> | Entrez gene name <sup>15</sup>                                                    | location <sup>16</sup> | type(s) <sup>17</sup>   |
|-----------------|----------------------|--------------------|---------------------|---------------------|-------------------|-------------------|-------------------|--------------------------|-----------------------------------------------------------------------------------|------------------------|-------------------------|
| ID379418        | MYG1, SHLB1          | -2,155             | -3,473              | -2,124              | -2,592            | -1,705            | -1,603            | C12ORF10                 | chromosome 12 open reading frame 10                                               | unknown                | other                   |
| ID1755          | MYL6                 | -1,036             | -1,142              | 1,035               | -1,379            | -1,574            | -1,538            | MYL6                     | Myosin light polypeptide 6                                                        | cytoplasm              | other                   |
| ID1205          | NAGK                 | 1,103              | -1,123              | -1,153              | -1,563            | -1,270            | -1,103            | NAGK                     | N-acetyl-D-glucosamine kinase                                                     | cytoplasm              | kinase                  |
| ID405           | NASP                 | -1,277             | -1,879              | -1,439              | -1,529            | -1,328            | -2,147            | NASP                     | nuclear autoantigenic sperm protein (histone-binding)                             | nucleus                | other                   |
| ID1632          | NDKA, COMD1          | -1,792             | -1,691              | -1,498              | -1,265            | -1,277            | -1,090            | NME1                     | non-metastatic cells 1, protein (NM23A) expressed in                              | nucleus                | kinase                  |
| ID659           | NDUS1                | 1,145              | 1,046               | 1,210               | -1,766            | -1,779            | -2,119            | NDUFS1                   | NADH dehydrogenase (ubiquinone) Fe-S protein 1, 75kDa (NADHcoenzyme Q reductase)  | cytoplasm              | enzyme                  |
| ID1432          | NNMT                 | -1,533             | -1,382              | -1,409              | -1,463            | -1,597            | -1,509            | NNMT                     | nicotinamide N-methyltransferase                                                  | cytoplasm              | enzyme                  |
| ID845           | NP1L1                | 1,617              | 2,219               | 1,964               | 2,811             | 2,590             | 1,785             | NP1L1                    | nicotinamide N-methyltransferase                                                  | cytoplasm              | enzyme                  |
| ID926           | NP1L1                | -1,839             | -2,527              | -1,705              | -1,402            | -1,548            | -1,220            | NP1L1                    | nicotinamide N-methyltransferase                                                  | cytoplasm              | enzyme                  |
| ID929           | NP1L1, SYAP1         | -1,944             | -2,662              | -1,751              | -1,405            | -1,345            | -1,069            | NP1L1                    | nicotinamide N-methyltransferase                                                  | cytoplasm              | enzyme                  |
| ID842           | NP1L4                | 1,751              | 2,737               | 2,244               | 3,042             | 3,145             | 2,406             | NP1L4                    | nucleosome assembly protein 1-like 4                                              | nucleus                | other                   |
| ID846           | NP1L4                | 1,615              | 2,450               | 2,027               | 2,826             | 2,886             | 2,165             | NP1L4                    | nucleosome assembly protein 1-like 4                                              | nucleus                | other                   |
| ID2404447       | NP1L4                | 1,486              | 2,182               | 1,714               | 2,111             | 2,309             | 2,000             | NP1L4                    | nucleosome assembly protein 1-like 4                                              | nucleus                | other                   |
| ID1224          | NPM                  | -1,272             | -2,628              | -1,146              | -1,474            | 1,291             | 2,098             | NPM1                     | nucleophosmin (nucleolar phosphoprotein B23, numatrin)                            | nucleus                | transcription regulator |
| ID1225          | NPM, EF1D            | 1,296              | -1,042              | 1,008               | -1,098            | -1,050            | 1,600             | NPM1                     | nucleophosmin (nucleolar phosphoprotein B23, numatrin)                            | nucleus                | transcription regulator |
| ID50273         | NSAP, CALR           | 2,668              | 2,751               | 2,873               | 1,270             | 1,354             | 1,024             | SYNCRIP                  | synaptotagmin binding, cytoplasmic RNA interacting protein                        | nucleus                | other                   |
| ID3227          | NUCB1, VIME          | 1,562              | 2,523               | 1,627               | 2,124             | 1,756             | 1,505             | NUCB1                    | nucleobindin 1                                                                    | cytoplasm              | other                   |
| ID520           | NUCL                 | -1,558             | -2,115              | -1,753              | -1,998            | -1,639            | -1,902            | NCL                      | nucleolin                                                                         | nucleus                | other                   |
| ID1364          | NUDT5, ANXA5         | -1,385             | -1,615              | -1,246              | -1,199            | -1,321            | -1,237            | NUDT5                    | ADP-sugar pyrophosphatase                                                         | nucleus                | other                   |
| ID970           | ODO2                 | -1,675             | -1,804              | -1,508              | -2,817            | -1,823            | -1,907            | DLST                     | dihydrolipoamide S-Ssuccinyltransferase (E2 component of 2-oxo-glutarate complex) | cytoplasm              | enzyme                  |
| ID1255          | ODPB                 | -1,092             | -1,307              | -1,250              | -1,496            | -1,549            | -1,523            | PDHB                     | pyruvate dehydrogenase (lipoamide) beta                                           | cytoplasm              | enzyme                  |
| ID1282          | ODPB, CSN6           | -1,032             | -1,069              | -1,101              | -2,498            | -2,082            | -1,988            | PDHB                     | pyruvate dehydrogenase (lipoamide) beta                                           | cytoplasm              | enzyme                  |
| ID1321          | OTUB1                | -1,651             | -1,868              | -1,671              | -1,150            | -1,275            | -1,071            | OTUB1                    | ubiquitin thioesterase OTUB1                                                      | cytoplasm              | enzyme                  |
| ID1312          | OTUB1                | -1,790             | -2,101              | -1,583              | -1,688            | -1,580            | -1,361            | OTUB1                    | ubiquitin thioesterase OTUB1                                                      | cytoplasm              | enzyme                  |
| ID4295          | P3H1                 | -1,537             | -2,048              | -1,719              | -1,019            | -1,472            | -1,363            | LEPRE1                   | leucine proline-enriched proteoglycan (leprecan) 1                                | nucleus                | enzyme                  |
| ID2818369       | P3H1                 | -1,916             | -2,424              | -2,043              | -1,315            | -1,431            | -1,135            | LEPRE1                   | leucine proline-enriched proteoglycan (leprecan) 1                                | nucleus                | enzyme                  |
| ID558           | P3H3                 | 1,046              | -1,272              | -1,017              | -6,058            | -1,608            | -1,654            | LEPREL2                  | leprecan-like 2                                                                   | nucleus                | enzyme                  |
| ID813           | P4HA1, TCPA          | 1,277              | 1,525               | 1,353               | 1,217             | 1,228             | -1,089            | P4HA1                    | prolyl 4-hydroxylase, alpha polypeptide I                                         | cytoplasm              | enzyme                  |
| ID1412          | PA1B2, PSME1         | -1,271             | -1,496              | -1,187              | -1,377            | -1,388            | -1,308            | PAFAH1B2                 | platelet-activating factor acetylhydrolase IB subunit beta                        | nucleus                | transcription regulator |
| ID1032          | PA2G4, SAHH          | -2,284             | -2,420              | -1,911              | -4235,010         | -1,846            | -1,486            | PA2G4                    | proliferation-associated 2G4, 38kDa                                               | nucleus                |                         |
| ID1511          | PARK7                | -1,752             | -1,958              | -1,645              | -2,009            | -1,378            | -1,393            | PARK7                    | Parkinson disease (autosomal recessive, early onset) 7                            | nucleus                | other                   |
| ID1304          | PCNA                 | -1,524             | -1,898              | -1,456              | -1,470            | -1,547            | -1,746            | PCNA                     | proliferating cell nuclear antigen                                                | nucleus                | other                   |
| ID1328          | PCNA, CX026          | -1,274             | -1,641              | -1,208              | -1,060            | -1,239            | -1,389            | PCNA                     | proliferating cell nuclear antigen                                                | nucleus                | other                   |
| ID230824        | PDI A1               | 1,303              | 1,519               | 1,192               | 1,151             | -1,483            | -1,361            | P4HB                     | prolyl 4-hydroxylase, beta polypeptide                                            | cytoplasm              | enzyme                  |
| ID2239          | PDI A1               | 1,609              | 1,519               | 1,604               | 3,066             | 1,424             | 1,158             | P4HB                     | prolyl 4-hydroxylase, beta polypeptide                                            | cytoplasm              | enzyme                  |
| ID824           | PDI A1               | 1,243              | 1,203               | 1,277               | 1,888             | 1,039             | -1,117            | P4HB                     | prolyl 4-hydroxylase, beta polypeptide                                            | cytoplasm              | enzyme                  |
| ID451640        | PDI A3               | 1,306              | 1,416               | 1,108               | 1,590             | -1,007            | -1,378            | PDI A3                   | protein disulfide-isomerase A3                                                    | cytoplasm              | peptidase               |
| ID854           | PDI A3, HNRPF        | 1,218              | 1,040               | 1,239               | 1,556             | -1,064            | -1,273            | PDI A3                   | protein disulfide-isomerase A3                                                    | cytoplasm              | peptidase               |
| ID17374         | PDI A3, PEPP         | 1,259              | 1,741               | 1,295               | 1,180             | -1,037            | -1,126            | PDI A3                   | protein disulfide-isomerase A3                                                    | cytoplasm              | peptidase               |
| ID836           | PDI A3, TBA1B        | 1,768              | 2,728               | 1,699               | 2,107             | 1,735             | 1,283             | PDI A3                   | protein disulfide-isomerase A3                                                    | cytoplasm              | peptidase               |
| ID370380        | PDI A4               | 1,469              | 1,700               | 1,427               | 1,147             | 1,409             | 1,489             | PDI A4                   | protein disulfide-isomerase A4                                                    | cytoplasm              | enzyme                  |
| ID660           | PDI A4               | 1,258              | 1,538               | 1,351               | 1,708             | 2,889             | 1,490             | PDI A4                   | protein disulfide-isomerase A4                                                    | cytoplasm              | enzyme                  |
| ID22159         | PDI A4, HSP71        | 1,351              | 1,600               | 1,428               | 2,383             | 2,982             | 2,044             | PDI A4                   | protein disulfide-isomerase A4                                                    | cytoplasm              | enzyme                  |
| ID982           | PDI A6               | 1,387              | 1,225               | 1,443               | 1,624             | 1,007             | -1,028            | PDI A6                   | protein disulfide-isomerase A6                                                    | cytoplasm              | enzyme                  |
| ID176254        | PDI A6, F10A1        | -1,337             | -1,588              | -1,303              | -1,230            | -1,303            | -1,298            | PDI A6                   | protein disulfide-isomerase A6                                                    | cytoplasm              | enzyme                  |
| ID1784          | PEA15                | -2,992             | -3,283              | -1,698              | -1,723            | -1,712            | -1,692            | PEA15                    | astrocytic phosphoprotein PEA-15                                                  | cytoplasm              |                         |
| ID1522          | PF3D3                | -1,489             | -1,694              | -1,516              | -1,773            | -1,351            | -1,292            | VBP1                     | von Hippel-Lindau binding protein 1                                               | cytoplasm              | other                   |
| ID1468          | PHB, HSPB1           | 1,340              | 1,423               | 1,385               | -1,237            | -1,423            | -1,721            | PHB                      | prohibitin                                                                        | nucleus                | transcription regulator |
| ID16655         | PHP14                | -1,586             | -1,561              | -1,311              | -1,919            | -1,543            | -1,772            | PHPT1                    | phosphohistidine phosphatase 1                                                    | cytoplasm              | phosphatase             |
| ID798           | PNCB, FKBP4          | -1,549             | -1,793              | -1,580              | -1,491            | -1,424            | -1,230            | NAPRT1                   | nicotinate phosphoribosyltransferase domain containing 1                          | unknown                | enzyme                  |
| ID1443          | PNPO                 | -1,536             | -1,425              | -1,247              | -6,307            | -1,323            | -1,286            | PNPO                     | pyridoxamine 5'-phosphate oxidase                                                 | unknown                | enzyme                  |
| ID1272          | PP1A                 | -1,108             | -1,162              | 1,302               | -4,195            | -1,209            | -1,358            | PPP1CA                   | protein phosphatase 1, catalytic subunit, alpha isozyme                           | cytoplasm              | phosphatase             |
| ID534785        | PP1A                 | -1,790             | -1,848              | -1,680              | -1,461            | -1,294            | -1,286            | PPP1CA                   | protein phosphatase 1, catalytic subunit, alpha isozyme                           | cytoplasm              | phosphatase             |
| ID1030          | PP1R7, IF4A1         | -2,238             | -2,398              | -2,187              | -1,873            | -1,791            | -1,742            | PPP1R7                   | protein phosphatase 1, regulatory (inhibitor) subunit 7                           | nucleus                | phosphatase             |
| ID1316          | PP4C, EF1D           | -1,310             | -1,627              | -1,313              | 1,031             | -1,226            | -1,180            | PPP4C                    | Serine/threonine-protein phosphatase 4 catalytic subunit                          | nucleus                | phosphatase             |
| ID2382844       | PPM1G                | -1,612             | -1,517              | -1,556              | -1,290            | -1,584            | -1,903            | PPM1G                    | protein phosphatase, Mg2+/Mn2+ dependent, 1G                                      | nucleus                | phosphatase             |
| ID1060          | PPME1                | -1,308             | -1,543              | -1,478              | -1,750            | -1,682            | -1,501            | PPME1                    | protein phosphatase methyltransferase 1                                           | unknown                | enzyme                  |
| ID1249          | PPP6                 | -1,496             | -1,527              | -1,466              | -1,163            | -1,119            | -1,096            | PPP6C                    | protein phosphatase 6, catalytic subunit                                          | nucleus                | phosphatase             |
| ID1243          | PPP6, LDHB           | -2,087             | -1,908              | -1,961              | -1,347            | -1,453            | -1,307            | PPP6C                    | protein phosphatase 6, catalytic subunit                                          | nucleus                | phosphatase             |

Table S-2

| ID <sup>1</sup> | Protein <sup>2</sup> | 0 min <sup>3</sup> | 30 min <sup>3</sup> | 60 min <sup>3</sup> | 24 h <sup>3</sup> | 48 h <sup>3</sup> | 72 h <sup>3</sup> | IPA symbol <sup>14</sup> | Entrez gene name <sup>15</sup>                                                 | location <sup>16</sup> | type(s) <sup>17</sup>   |
|-----------------|----------------------|--------------------|---------------------|---------------------|-------------------|-------------------|-------------------|--------------------------|--------------------------------------------------------------------------------|------------------------|-------------------------|
| ID1296          | PPP6, PGP            | -2,082             | -1,635              | -1,930              | -1,499            | -1,746            | -1,683            | PPP6C                    | protein phosphatase 6, catalytic subunit                                       | nucleus                | phosphatase             |
| ID3102815       | PRSGA, TXND5         | -1,088             | -1,407              | -1,385              | -1,070            | -1,481            | -1,654            | PSMC3                    | proteasome (prosome, macropain) 26S subunit, ATPase, 3                         | nucleus                | transcription regulator |
| ID177384        | PRSGA, TXND5         | -1,617             | -2,139              | -2,210              | -1,450            | -1,522            | -1,376            | PSMC3                    | proteasome (prosome, macropain) 26S subunit, ATPase, 3                         | nucleus                | transcription regulator |
| ID1541          | PRDX2, GSTP1         | -2,703             | -2,934              | -2,878              | -1,737            | -1,536            | -1,671            | PRDX2                    | peroxiredoxin 2                                                                | cytoplasm              | enzyme                  |
| ID1510          | PRDX3                | -2,387             | -3,015              | -2,500              | -134,069          | -1,879            | -1,803            | PRDX3                    | peroxiredoxin 3                                                                | cytoplasm              | enzyme                  |
| ID584346        | PRDX3, HSPB1         | -2,842             | -2,555              | -2,003              | -1,607            | -1,397            | -1,384            | PRDX3                    | peroxiredoxin 3                                                                | cytoplasm              | enzyme                  |
| ID3056834       | PRDX4                | -1,772             | -1,379              | -1,325              | 1,465             | 1,153             | 2,154             | PRDX4                    | peroxiredoxin 4                                                                | cytoplasm              | enzyme                  |
| ID1497          | PRDX4                | -2,381             | -1,622              | -1,726              | -1,057            | -1,106            | -1,051            | PRDX4                    | peroxiredoxin 4                                                                | cytoplasm              | enzyme                  |
| ID1802          | PROF2, TR112         | -1,494             | -1,646              | -1,419              | -1,681            | -2,019            | -1,180            | PFN2                     | profilin-2                                                                     | cytoplasm              |                         |
| ID469498        | PRSA, SYWC           | 1,337              | 1,596               | 1,357               | 1,132             | -1,076            | -1,176            | PSMC1                    | proteasome (prosome, macropain) 26S subunit, ATPase, 1                         | nucleus                | peptidase               |
| ID1002          | PRSGA                | -1,299             | -1,699              | -1,514              | -1,256            | -1,416            | -1,363            | PSMC3                    | proteasome (prosome, macropain) 26S subunit, ATPase, 3                         | nucleus                | transcription regulator |
| ID997           | PRS7                 | -1,303             | -1,795              | -1,517              | -1,556            | -1,481            | -1,393            | PSMC2                    | 26S proteasome regulatory subunit 7                                            | cytoplasm              |                         |
| ID172969        | PSA3, TPD54          | -1,490             | -1,689              | -1,560              | -1,502            | -1,355            | -1,222            | PSMA3                    | proteasome (prosome, macropain) subunit, alpha type, 3                         | cytoplasm              | peptidase               |
| ID3058865       | PSB6                 | -1,093             | -1,344              | -1,280              | -1,442            | -1,419            | -1,781            | PSMB6                    | proteasome subunit beta type-6                                                 | nucleus                |                         |
| ID1402          | PSB7                 | -1,325             | -1,729              | -1,537              | -1,588            | -1,330            | -1,169            | PSMB7                    | proteasome (prosome, macropain) subunit, beta type, 7                          | cytoplasm              | peptidase               |
| ID1519          | PSD10                | -1,522             | -1,566              | -1,352              | -1,172            | -1,318            | -1,243            | PSMD10                   | 26S proteasome non-ATPase regulatory subunit 10                                | nucleus                |                         |
| ID1140          | PSD13                | -1,553             | -1,845              | -2,149              | -1,650            | -1,709            | -1,617            | PSMD13                   | proteasome (prosome, macropain) 26S subunit, non-ATPase, 13                    | cytoplasm              | peptidase               |
| ID1244          | PSDE                 | -1,251             | -1,582              | -1,417              | -2,482            | -1,390            | -1,386            | PSMD14                   | proteasome (prosome, macropain) 26S subunit, non-ATPase, 14                    | cytoplasm              | peptidase               |
| ID566           | PSMD2                | -1,662             | -2,073              | -1,791              | -1,473            | -1,400            | -1,207            | PSMD2                    | proteasome (prosome, macropain) 26S subunit, non-ATPase, 2                     | cytoplasm              | other                   |
| ID276677        | PSMD4                | -1,046             | -1,978              | -1,440              | -2,848            | -2,184            | -1,321            | PSMD4                    | proteasome (prosome, macropain) 26S subunit, non-ATPase, 4                     | cytoplasm              | other                   |
| ID955           | PSMD5, SH3G1         | -1,905             | -1,702              | -1,213              | -1,939            | -1,688            | -1,731            | PSMD5                    | proteasome (prosome, macropain) 26S subunit, non-ATPase, 5                     | cytoplasm              | other                   |
| ID954           | PSMD5, SH3G1         | -1,647             | -1,869              | -1,732              | -1,982            | -1,714            | -1,521            | PSMD5                    | proteasome (prosome, macropain) 26S subunit, non-ATPase, 5                     | cytoplasm              | other                   |
| ID1433          | PSME1, 6PGL          | -1,083             | -1,131              | -1,074              | 1,516             | -1,048            | -1,229            | PSME1                    | proteasome (prosome, macropain) activator subunit 1 (PA28 alpha)               | cytoplasm              | other                   |
| ID1392          | PSME2                | -1,837             | -2,036              | -1,916              | -1,378            | -1,584            | -1,741            | PSME2                    | proteasome (prosome, macropain) activator subunit 2 (PA28 beta)                | cytoplasm              | peptidase               |
| ID3313934       | PSME2, 1433E         | -1,582             | -1,876              | -1,687              | 1,751             | 1,175             | 1,085             | PSME2                    | proteasome (prosome, macropain) activator subunit 2 (PA28 beta)                | cytoplasm              | peptidase               |
| ID1373          | PSME2, 1433E         | 1,036              | -1,031              | 1,033               | 1,822             | -1,286            | -1,410            | PSME2                    | proteasome (prosome, macropain) activator subunit 2 (PA28 beta)                | cytoplasm              | peptidase               |
| ID1409          | PSME2, CLIC4         | -2,173             | -1,981              | -1,980              | -1,600            | -1,623            | -1,462            | PSME2                    | proteasome (prosome, macropain) activator subunit 2 (PA28 beta)                | cytoplasm              | peptidase               |
| ID1396          | PSME3, GSTO1         | -1,585             | -1,513              | -1,380              | -1,334            | -1,310            | -1,238            | PSME3                    | proteasome (prosome, macropain) activator subunit 2 (PA28 beta)                | cytoplasm              | peptidase               |
| ID458579        | PUR4                 | -1,313             | -1,827              | -1,449              | -2,127            | -1,705            | -1,577            | PFAS                     | proteasome activator complex subunit 3                                         | nucleus                |                         |
| ID3435858       | QCR1                 | -1,664             | -2,568              | -1,787              | -2,026            | 11,944            | 1,390             | UQCRC1                   | phosphoribosylformylglycinamide synthase                                       | cytoplasm              | enzyme                  |
| ID714           | RANB3                | 1,697              | 3,081               | 1,857               | 2,758             | 2,644             | 2,499             | RANBP3                   | ubiquinol-cytochrome c reductase core protein I                                | cytoplasm              | enzyme                  |
| ID1446          | RANG, PSA3           | -1,741             | -1,816              | -1,424              | -1,659            | -1,710            | -1,732            | RANBP3                   | RAN binding protein 3                                                          | nucleus                | other                   |
| ID932           | RBBP4                | 1,181              | -1,041              | 1,067               | -1,718            | -1,453            | -1,579            | RANBP1                   | RAN binding protein 1                                                          | nucleus                | other                   |
| ID1586          | RBMB8A               | 1,020              | -1,239              | -1,167              | -1,649            | -1,359            | -1,509            | RBBP4                    | retinoblastoma binding protein 4                                               | nucleus                | enzyme                  |
| ID1604          | RBMB8A               | -1,296             | -2,048              | -1,673              | -2,254            | -1,868            | -4,104            | RBMB8A                   | RNA binding motif protein 8A                                                   | nucleus                | other                   |
| ID280677        | RCN1                 | 1,131              | 1,252               | 1,300               | 1,997             | 1,140             | -1,108            | RCN1                     | RNA binding motif protein 8A                                                   | nucleus                | other                   |
| ID2687300       | RCN1                 | 1,245              | 1,152               | 1,372               | 2,177             | 1,360             | -1,005            | RCN1                     | reticulocalbin 1, EF-hand calcium binding domain                               | cytoplasm              | other                   |
| ID2662678       | RCN1                 | 1,158              | -1,085              | 1,245               | 1,564             | 1,044             | -1,076            | RCN1                     | reticulocalbin 1, EF-hand calcium binding domain                               | cytoplasm              | other                   |
| ID459           | RCN1                 | -1,560             | -2,420              | -1,772              | -2,173            | -1,424            | -1,502            | RCN1                     | reticulocalbin 1, EF-hand calcium binding domain                               | cytoplasm              | other                   |
| ID1127          | RCN1, SPRC           | -1,117             | 1,006               | -1,054              | 1,176             | -1,365            | -1,662            | RCN1                     | reticulocalbin 1, EF-hand calcium binding domain                               | cytoplasm              | other                   |
| ID2680471       | RCN1, SPRC           | 1,034              | -1,006              | 1,138               | 1,552             | -1,073            | -1,283            | RCN1                     | reticulocalbin 1, EF-hand calcium binding domain                               | cytoplasm              | other                   |
| ID935           | RD23A                | -1,998             | -2,415              | -1,724              | -1,847            | -2,116            | -1,842            | RAD23A                   | RAD23 homolog A (S. cerevisiae)                                                | nucleus                | other                   |
| ID3128108       | RD23B                | 2,070              | 4,470               | 2,249               | 3,360             | 3,881             | 2,705             | RAD23B                   | UV excision repair protein RAD23 homolog B                                     | nucleus                | other                   |
| ID94683         | RD23B                | 1,315              | 1,522               | 1,278               | 1,318             | -1,093            | -1,497            | RAD23B                   | UV excision repair protein RAD23 homolog B                                     | nucleus                | other                   |
| ID1375          | RFA2                 | -1,494             | -1,793              | -1,527              | -2,399            | -2,043            | -1,959            | RP2A                     | replication protein A2, 32kDa                                                  | nucleus                | other                   |
| ID1146          | RFC2                 | -1,616             | -2,186              | -1,798              | -3733,614         | -1,335            | -1,505            | RFC2                     | replication factor C (activator 1) 2, 40kDa                                    | nucleus                | other                   |
| ID851           | RHG01                | 1,657              | 2,295               | 2,005               | 2,519             | 2,570             | 1,865             | ARRHGAP1                 | Rho GTPase activating protein 1                                                | cytoplasm              | other                   |
| ID922           | RHG01, HNRH2         | -1,500             | -1,910              | -1,774              | -9,964            | -1,665            | -1,624            | ARRHGAP1                 | Rho GTPase activating protein 1                                                | cytoplasm              | other                   |
| ID1005          | RINI                 | -3,040             | -2,924              | -2,110              | -2,586            | -2,028            | -1,445            | RNH1                     | ribonuclease/angiogenin inhibitor 1                                            | cytoplasm              | other                   |
| ID1156          | RSSA, SET            | -1,199             | -1,412              | -1,093              | -1,154            | -1,374            | -1,709            | RPSA                     | ribosomal protein SA                                                           | plasma membrane        | transmembrane receptor  |
| ID357613        | SAE1, ACTG           | -1,374             | -1,775              | -1,663              | -1,501            | -1,443            | -1,413            | SAE1                     | SUMO-activating enzyme subunit 1                                               | nucleus                |                         |
| ID1042          | SAHH                 | -1,920             | -2,027              | -1,546              | -1,708            | -1,521            | -1,307            | AHCY                     | adenosylhomocysteinase                                                         | cytoplasm              | enzyme                  |
| ID3228910       | SAKS1, SAE1          | -1,681             | -1,758              | -1,430              | 1,021             | -1,083            | 1,084             | UBXN1                    | UBX domain-containing protein 1                                                | cytoplasm              |                         |
| ID703           | SCFD1                | 1,279              | 1,419               | 1,226               | 3,165             | 1,503             | 1,227             | SCFD1                    | sec1 family domain containing 1                                                | cytoplasm              | transporter             |
| ID1093          | SCMC1, ILEU          | -2,121             | -2,521              | -1,807              | -1664,897         | -1,582            | -1,603            | SLC25A24                 | solute carrier family 25 (mitochondrial carrier; phosphate carrier), member 24 | cytoplasm              | other                   |
| ID418384        | SCMC1, TADBP         | -1,015             | -1,260              | -1,020              | -1,152            | -2,059            | -1,829            | SLC25A24                 | solute carrier family 25 (mitochondrial carrier; phosphate carrier), member 24 | cytoplasm              | other                   |
| ID937           | SCRN1                | -2,138             | -2,467              | -1,729              | -2,551            | -1,882            | -1,643            | SCRN1                    | secernin 1                                                                     | cytoplasm              | other                   |
| ID697           | SDC10, AGM1          | 1,424              | 1,565               | 1,426               | 1,833             | 2,571             | 1,815             | CWC27                    | spliceosome-associated protein CWC27 homolog                                   | nucleus                |                         |
| ID921           | SEPT8, HNRH1         | -1,247             | -1,605              | -1,498              | -1,813            | -1,846            | -1,684            | SEPT8                    | septin 8                                                                       | extracellular space    | other                   |

Table S-2

| ID <sup>1</sup> | Protein <sup>2</sup> | 0 min <sup>3</sup> | 30 min <sup>3</sup> | 60 min <sup>3</sup> | 24 h <sup>3</sup> | 48 h <sup>3</sup> | 72 h <sup>3</sup> | IPA symbol <sup>14</sup> | Entrez gene name <sup>15</sup>                                         | location <sup>16</sup> | type(s) <sup>17</sup>   |
|-----------------|----------------------|--------------------|---------------------|---------------------|-------------------|-------------------|-------------------|--------------------------|------------------------------------------------------------------------|------------------------|-------------------------|
| ID279386        | SET                  | -1,323             | -1,572              | -1,507              | -1,420            | -1,252            | -1,338            | SET                      | SET nuclear oncogene                                                   | nucleus                | phosphatase             |
| ID1142          | SET                  | -1,372             | -1,875              | -1,639              | -1,593            | -1,152            | -1,438            | SET                      | SET nuclear oncogene                                                   | nucleus                | phosphatase             |
| ID1157          | SET                  | -1,603             | -2,273              | -1,512              | -1,646            | -1,631            | -1,658            | SET                      | SET nuclear oncogene                                                   | nucleus                | phosphatase             |
| ID90190         | SET                  | -2,221             | -6,412              | -3,373              | -1,646            | -1,165            | -1,405            | SET                      | SET nuclear oncogene                                                   | nucleus                | phosphatase             |
| ID1052          | SET, ADRM1           | -2,342             | -2,025              | -2,396              | -1,838            | -1,554            | -1,407            | SET                      | SET nuclear oncogene                                                   | nucleus                | phosphatase             |
| ID2906459       | SET, HDGF            | -1,483             | -1,610              | -1,807              | -2,423            | -1,378            | -1,407            | SET                      | SET nuclear oncogene                                                   | nucleus                | phosphatase             |
| ID306795        | SET, HDGF            | -3,190             | -3,540              | -3,118              | -5,583            | -2,151            | -1,558            | SET                      | SET nuclear oncogene                                                   | nucleus                | phosphatase             |
| ID92002         | SET, SPSY            | -3,877             | -2,284              | -3,046              | -1,512            | -1,487            | -1,342            | SET                      | SET nuclear oncogene                                                   | nucleus                | phosphatase             |
| ID3760549       | SF3A3                | -1,001             | -1,200              | -1,529              | -1,461            | -1,537            | -1,531            | SF3A3                    | splicing factor 3A subunit 3                                           | nucleus                | other                   |
| ID9421          | SF3B2                | -1,237             | 1,022               | -1,063              | 1,879             | -1,007            | -1,322            | SF3B2                    | splicing factor 3b, subunit 2, 145kDa                                  | nucleus                | other                   |
| ID354           | SF3B2                | -1,550             | -2,097              | -2,136              | -5,397            | -1,717            | -1,982            | SF3B2                    | splicing factor 3b, subunit 2, 145kDa                                  | nucleus                | other                   |
| ID355           | SF3B2                | -1,573             | -2,160              | -2,096              | -4,251            | -1,868            | -2,046            | SF3B2                    | splicing factor 3b, subunit 2, 145kDa                                  | nucleus                | other                   |
| ID2995227       | SFRS1                | -1,002             | -1,171              | -1,103              | -2,282            | -1,476            | -1,555            | SRSF1                    | serine/arginine-rich splicing factor 1                                 | nucleus                | other                   |
| ID1565          | SFRS3                | 1,036              | -1,182              | -1,360              | -1,510            | -1,677            | -1,817            | SFRS3                    | serine/arginine-rich splicing factor 3                                 | nucleus                | other                   |
| ID1572          | SFRS3                | 1,207              | -1,332              | -1,129              | -29,426           | -2,104            | -3,219            | SFRS3                    | serine/arginine-rich splicing factor 3                                 | nucleus                | other                   |
| ID2287478       | SFRS3                | -1,345             | -1,469              | -1,306              | -3,871            | -2,315            | -2,129            | SFRS3                    | serine/arginine-rich splicing factor 3                                 | nucleus                | other                   |
| ID1536          | SFRS3                | -2,333             | -2,110              | -1,844              | -1,349            | -1,688            | -1,503            | SFRS3                    | serine/arginine-rich splicing factor 3                                 | nucleus                | other                   |
| ID1267          | SGTA, HDGF           | -1,768             | -2,532              | -2,038              | -1,273            | -1,160            | -1,173            | SGTA                     | small glutamine-rich tetratricopeptide repeat-containing protein alpha | nucleus                | other                   |
| ID972           | SHLB2                | -1,581             | -1,845              | -1,420              | -2,128            | -1,769            | -1,875            | SH3GLB2                  | SH3-domain GRB2-like endophilin B2                                     | cytoplasm              | other                   |
| ID950           | SHLB2, AL9A1         | 1,098              | -1,039              | -1,141              | -1,743            | -1,427            | -1,099            | SH3GLB2                  | SH3-domain GRB2-like endophilin B2                                     | cytoplasm              | other                   |
| ID408351        | SHLB2, AL9A1         | -1,756             | -1,692              | -1,555              | -1,608            | -1,592            | -1,731            | SH3GLB2                  | SH3-domain GRB2-like endophilin B2                                     | cytoplasm              | other                   |
| ID1628          | SKP1                 | -1,097             | -1,278              | -1,103              | -1,060            | -1,369            | -1,733            | SKP1                     | S-phase kinase-associated protein 1                                    | cytoplasm              | other                   |
| ID1305          | SNAA, SFRS1          | -1,306             | -1,329              | -1,203              | -1,715            | -1,843            | -1,655            | SNAA                     | alpha-soluble NSF attachment protein                                   |                        |                         |
| ID956           | SNX6, HNRH1          | -1,694             | -2,045              | -1,673              | -2,030            | -1,646            | -1,488            | SNX6                     | sorting nexin 6                                                        | cytoplasm              | transporter             |
| ID508072        | SODC                 | -1,726             | -1,632              | -1,353              | -2,160            | -1,789            | -2,070            | SOD1                     | superoxide dismutase 1, soluble                                        | cytoplasm              | enzyme                  |
| ID1651          | SODC                 | -1,488             | -1,680              | -1,168              | -1,337            | -1,190            | -1,502            | SOD1                     | superoxide dismutase 1, soluble                                        | cytoplasm              | enzyme                  |
| ID30752         | SODC                 | -2,400             | -2,568              | -1,708              | -1,824            | -1,875            | -1,772            | SOD1                     | superoxide dismutase 1, soluble                                        | cytoplasm              | enzyme                  |
| ID1589          | SORCN                | 1,107              | -1,076              | -1,066              | -2,058            | -1,636            | -1,658            | SRI                      | sorcin                                                                 | cytoplasm              | transporter             |
| ID2666660       | SPRC                 | 1,062              | -1,231              | 1,214               | 1,363             | -1,246            | -1,676            | SPARC                    | SPARC                                                                  | extracellular space    | other                   |
| ID278067        | SPRC                 | -1,011             | -1,479              | 1,365               | 1,046             | -1,533            | -1,875            | SPARC                    | SPARC                                                                  | extracellular space    | other                   |
| ID1083          | SPS1                 | -1,873             | -2,245              | -1,900              | -1,651            | -1,471            | -1,583            | SEPHS1                   | selenophosphate synthetase 1                                           | unknown                | enzyme                  |
| ID1121          | SPSY, ARSA1          | -2,367             | -1,988              | -2,088              | -1,874            | -1,737            | -1,455            | SMS                      | spermine synthase                                                      | unknown                | enzyme                  |
| ID557           | SRC8                 | -1,593             | -2,231              | -1,653              | -2,059            | -1,717            | -1,639            | CTTN                     | cortactin                                                              | plasma membrane        | other                   |
| ID1638          | SSRD                 | 1,069              | 1,416               | 1,742               | -1,881            | -1,730            | 1,022             | SSR4                     | translocon-associated protein subunit delta                            | cytoplasm              | other                   |
| ID1660          | SSRD                 | -1,087             | -1,482              | -1,092              | 1,737             | -1,020            | 1,027             | SSR4                     | translocon-associated protein subunit delta                            | cytoplasm              | other                   |
| ID853           | STABP                | 1,792              | 3,068               | 2,070               | 2,966             | 3,182             | 2,400             | STAMBP                   | STAM binding protein                                                   | nucleus                | enzyme                  |
| ID1553          | STAM1, PSB9          | -1,339             | -1,742              | -1,853              | -1,119            | -1,428            | -1,441            | STAM                     | signal transducing adaptor molecule (SH3 domain and ITAM motif) 1      | cytoplasm              | other                   |
| ID1119          | STML2, ACTG          | 1,422              | 1,249               | 1,362               | 2,050             | 1,170             | 1,052             | STOML2                   | stomatatin (EPB72)-like 2                                              | plasma membrane        | other                   |
| ID1695          | STMN1                | -1,292             | -1,711              | -1,107              | -1,582            | -1,355            | -1,749            | STMN1                    | stathmin 1                                                             | cytoplasm              | other                   |
| ID1689          | STMN1                | -1,480             | -1,905              | -1,241              | -2,067            | -1,842            | -2,258            | STMN1                    | stathmin 1                                                             | cytoplasm              | other                   |
| ID1161          | STRAP                | -1,989             | -2,206              | -1,933              | -1,859            | -1,550            | -1,292            | STRAP                    | serine/threonine kinase receptor associated protein                    | plasma membrane        | other                   |
| ID1058          | SUCB1, IF34          | -1,476             | -1,774              | -1,370              | -2,335            | -2,200            | -1,821            | SUCLA2                   | succinate-CoA ligase, ADP-forming, beta subunit                        | cytoplasm              | enzyme                  |
| ID1214          | SUGT1                | -1,797             | -2,352              | -1,812              | -1,382            | -1,420            | -1,245            | SUGT1                    | protein SGT1 homolog                                                   | nucleus                | other                   |
| ID144537        | SUGT1, NUBP1         | -1,598             | -1,590              | -1,260              | -1,847            | -1,842            | -1,626            | SUGT1                    | protein SGT1 homolog                                                   | nucleus                | other                   |
| ID974           | SYDC                 | -1,451             | -1,745              | -1,370              | -1,483            | -1,228            | -1,051            | DARS                     | aspartyl-tRNA synthetase                                               | cytoplasm              | enzyme                  |
| ID934           | SYDC, HNRH1          | -1,313             | -1,702              | -1,572              | -116,442          | -1,581            | -1,677            | DARS                     | aspartyl-tRNA synthetase                                               | cytoplasm              | enzyme                  |
| ID28319         | SYG, CALD1           | -1,312             | -1,195              | -1,367              | 2,222             | -1,581            | -1,173            | GARS                     | glycyl-tRNA synthetase                                                 | cytoplasm              | enzyme                  |
| ID673           | SYG, DPYL2           | -1,716             | -1,719              | -1,670              | 2,686             | -1,409            | -1,275            | GARS                     | glycyl-tRNA synthetase                                                 | cytoplasm              | enzyme                  |
| ID908           | SYHC                 | -1,390             | -1,392              | -1,387              | -2,288            | -1,735            | -1,530            | HARS                     | histidyl-tRNA synthetase                                               | cytoplasm              | enzyme                  |
| ID377849        | SYHC, VATB2          | -1,113             | -1,287              | -1,136              | -1,470            | -1,566            | -1,661            | HARS                     | histidyl-tRNA synthetase                                               | cytoplasm              | enzyme                  |
| ID683           | SYK, TRFL            | 1,495              | 2,130               | 1,624               | 2,642             | 2,158             | 1,648             | KARS                     | lysyl-tRNA ligase                                                      | cytoplasm              | enzyme                  |
| ID885           | SYWC                 | -1,792             | -1,739              | -1,581              | -1,778            | -1,490            | -1,435            | WARS                     | tryptophanyl-tRNA synthetase                                           | cytoplasm              | enzyme                  |
| ID29100         | TADBP, ACY1          | -1,688             | -1,653              | -1,700              | -2,163            | -2,252            | -1,915            | TARDBP                   | TAR DNA binding protein                                                | nucleus                | transcription regulator |
| ID1084          | TADBP, PPME1         | -1,685             | -2,324              | -1,676              | -2,124            | -1,963            | -1,521            | TARDBP                   | TAR DNA binding protein                                                | nucleus                | transcription regulator |
| ID1270          | TALDO                | 1,192              | 1,057               | -1,051              | -3,619            | 1,010             | -1,128            | TALDO1                   | transaldolase 1                                                        | cytoplasm              | enzyme                  |
| ID1234          | TALDO, PP1B          | -1,582             | -1,633              | -1,533              | -1,260            | -1,204            | -1,099            | TALDO1                   | transaldolase 1                                                        | cytoplasm              | enzyme                  |
| ID890           | TBA1B                | -1,836             | -1,919              | -1,672              | -1,661            | -1,768            | -1,615            | TUBA1B                   | tubulin, alpha 1b                                                      | cytoplasm              | other                   |
| ID402687        | TBA1B                | -2,077             | -3,308              | -1,938              | -2,069            | -2,688            | -2,378            | TUBA1B                   | tubulin, alpha 1b                                                      | cytoplasm              | other                   |
| ID904           | TBA1B, TBB5          | -1,102             | 1,169               | -2,446              | -1,493            | -1,553            | -1,022            | TUBA1B                   | tubulin, alpha 1b                                                      | cytoplasm              | other                   |

Table S-2

| ID <sup>1</sup> | Protein <sup>2</sup> | 0 min <sup>3</sup> | 30 min <sup>3</sup> | 60 min <sup>3</sup> | 24 h <sup>3</sup> | 48 h <sup>3</sup> | 72 h <sup>3</sup> | IPA symbol <sup>14</sup> | Entrez gene name <sup>15</sup>                          | location <sup>16</sup> | type(s) <sup>17</sup>   |
|-----------------|----------------------|--------------------|---------------------|---------------------|-------------------|-------------------|-------------------|--------------------------|---------------------------------------------------------|------------------------|-------------------------|
| ID906           | TBA1C, PTRF          | -1,145             | 1,033               | -1,452              | -1,705            | -1,618            | -1,326            | TUBA1C                   | tubulin, alpha 1c                                       | cytoplasm              | other                   |
| ID2200          | TBA3                 | 1,755              | 2,616               | 2,151               | 2,745             | 3,052             | 2,244             | TUBA1A                   | tubulin alpha-1A chain                                  | cytoskeleton           | other                   |
| ID15904         | TBAK                 | 1,452              | 1,271               | -1,066              | -1,068            | -1,388            | -1,544            | TUBA1B                   | tubulin, alpha 1b                                       | cytoplasm              | other                   |
| ID876           | TBAK                 | -2,146             | -1,833              | -2,055              | -1,671            | -1,757            | -1,748            | TUBA1B                   | tubulin, alpha 1b                                       | cytoplasm              | other                   |
| ID3111980       | TBB2C                | -2,161             | -1,848              | -1,825              | -1,474            | -1,516            | -1,661            | TUBB2C                   | tubulin, beta 2C                                        | cytoplasm              | other                   |
| ID875           | TBB2C, TBB3          | -1,898             | -1,538              | -1,460              | -1,839            | -1,523            | -1,401            | TUBB2C                   | tubulin, beta 2C                                        | cytoplasm              | other                   |
| ID3104          | TBB2C, TBB6          | -1,692             | -1,660              | -1,495              | -1,542            | -1,240            | -1,336            | TUBB2C                   | tubulin, beta 2C                                        | cytoplasm              | other                   |
| ID3150          | TBB3, TBB2C          | -1,834             | -1,714              | -1,624              | -1,189            | -1,208            | -1,337            | TUBB3                    | tubulin, beta 3                                         | cytoplasm              | other                   |
| ID93790         | TBB5, TBB2C          | -1,085             | -1,312              | -1,085              | -2,286            | -2,339            | -1,958            | TUBB                     | tubulin, beta                                           | cytoplasm              | other                   |
| ID1780          | TBCA                 | -1,599             | -1,843              | -1,315              | -1,207            | -1,190            | -1,180            | TBCA                     | tubulin-specific chaperone A                            | cytoskeleton           | other                   |
| ID973           | TBG1, MPPB           | -1,399             | -1,605              | -1,513              | -2,000            | -1,377            | -1,458            | TUBG1                    | tubulin, gamma 1                                        | cytoplasm              | other                   |
| ID29990         | TCPA                 | 1,469              | 2,113               | 1,591               | -1,007            | 1,258             | 1,057             | TCPA                     | t-complex 1                                             | cytoplasm              | other                   |
| ID793           | TCPA                 | -1,664             | -1,922              | -1,658              | -1,683            | -1,400            | -1,173            | TCPA                     | t-complex 1                                             | cytoplasm              | other                   |
| ID888           | TCPB, RUVB1          | -1,429             | -1,655              | -1,482              | -2,786            | -1,355            | -1,234            | CCT2                     | chaperonin containing TCP1, subunit 2 (beta)            | cytoplasm              | kinase                  |
| ID804           | TCPE                 | -1,058             | -1,498              | -1,341              | -1,221            | -1,188            | -1,234            | CCT5                     | chaperonin containing TCP1, subunit 5 (epsilon)         | cytoplasm              | other                   |
| ID405373        | TCPE, FKBP4          | -1,213             | -1,506              | -1,411              | -1,338            | -1,138            | -1,228            | CCT5                     | chaperonin containing TCP1, subunit 5 (epsilon)         | cytoplasm              | other                   |
| ID847           | TCPE, HNRPK          | -1,192             | -1,548              | -1,374              | -1,459            | -1,367            | -1,545            | CCT5                     | chaperonin containing TCP1, subunit 5 (epsilon)         | cytoplasm              | other                   |
| ID771           | TCPG                 | -1,080             | -1,133              | -1,099              | -13,343           | -1,222            | -1,193            | CCT3                     | chaperonin containing TCP1, subunit 3 (gamma)           | cytoplasm              | other                   |
| ID760           | TCPG                 | -1,354             | -1,578              | -1,441              | -2,265            | -1,407            | -1,342            | CCT3                     | chaperonin containing TCP1, subunit 3 (gamma)           | cytoplasm              | other                   |
| ID796           | TCPQ, HNRPK          | 1,012              | -1,564              | -1,640              | -1,591            | -1,367            | -1,444            | CCT8                     | chaperonin containing TCP1, subunit 8 (theta)           | cytoplasm              | enzyme                  |
| ID1576          | TCTP                 | -1,088             | -1,360              | -1,198              | -1,557            | -1,433            | -1,452            | TPT1                     | tumor protein, translationally controlled 1             | cytoplasm              | other                   |
| ID1501          | TCTP, CBX1           | -1,257             | -1,564              | -1,241              | -1,163            | -1,236            | -1,089            | TPT1                     | tumor protein, translationally controlled 1             | cytoplasm              | other                   |
| ID1610          | TEBP                 | -1,615             | -1,654              | -1,655              | -2,095            | -1,585            | -2,546            | PTGES3                   | prostaglandin E synthase 3 (cytosolic)                  | cytoplasm              | enzyme                  |
| ID2310          | TEBP                 | -1,683             | -1,734              | -1,764              | -2,314            | -1,489            | -2,108            | PTGES3                   | prostaglandin E synthase 3 (cytosolic)                  | cytoplasm              | enzyme                  |
| ID540           | TERA                 | -1,366             | -1,557              | -1,527              | -2,055            | -1,632            | -1,282            | VCP                      | valosin-containing protein                              | cytoplasm              | enzyme                  |
| ID542           | TERA                 | -1,288             | -1,664              | -1,376              | -1,581            | -1,309            | -1,354            | VCP                      | valosin-containing protein                              | cytoplasm              | enzyme                  |
| ID9875          | TERA                 | -1,567             | -2,076              | -1,744              | -2,208            | -1,772            | -1,533            | VCP                      | valosin-containing protein                              | cytoplasm              | enzyme                  |
| ID1821          | THIO, RFA3, LEG1     | -1,496             | -1,454              | -1,281              | 1,712             | -1,041            | 1,981             | TXN                      | thioredoxin                                             | nucleus                |                         |
| ID1115          | THOC3                | -1,249             | -1,355              | -1,195              | -1,590            | -1,235            | -1,517            | THOC3                    | THO complex 3                                           | nucleus                | other                   |
| ID607           | THOP1                | 1,073              | -1,311              | -1,043              | -1,423            | -1,382            | -1,663            | THOP1                    | thimet oligopeptidase                                   | unknown                |                         |
| ID488           | TIF1B                | -1,397             | -2,674              | -2,446              | -2,990            | -1,898            | -1,879            | TRIM28                   | tripartite motif-containing 28                          | nucleus                | transcription regulator |
| ID1419          | TIF1B, 1433G         | -1,686             | -1,744              | -1,678              | -1,325            | -1,461            | -1,427            | TRIM28                   | tripartite motif-containing 28                          | nucleus                | transcription regulator |
| ID479           | TIF1B, HNRPU         | -1,848             | -2,248              | -2,037              | -5,236            | -2,168            | -1,668            | TRIM28                   | tripartite motif-containing 28                          | nucleus                | transcription regulator |
| ID774           | TM1L2                | 1,827              | 3,277               | 1,740               | 3,835             | 3,222             | 2,408             | TOM1L2                   | TOM1-like protein 2                                     | unknown                | transporter             |
| ID3085623       | TMOD3                | -1,702             | -1,873              | -1,553              | -1,042            | -1,063            | -1,403            | TMOD3                    | tropomodulin-3                                          | unknown                |                         |
| ID1315          | TPM1                 | 1,033              | -1,207              | -1,030              | -1,519            | -2,130            | -1,927            | TPM1                     | tropomyosin 1 (alpha)                                   | cytoplasm              | other                   |
| ID55610         | TPM1, TPM2           | 1,051              | -1,360              | -1,086              | -2,038            | -2,705            | -2,380            | TPM1                     | tropomyosin 1 (alpha)                                   | cytoplasm              | other                   |
| ID87491         | TPM2                 | -1,739             | -1,394              | -1,462              | -1,094            | -1,480            | 1,048             | TPM2                     | tropomyosin 2 (beta)                                    | cytoplasm              | other                   |
| ID1210          | TPM2                 | -1,018             | -1,432              | -1,156              | -1,512            | -1,496            | -1,185            | TPM2                     | tropomyosin 2 (beta)                                    | cytoplasm              | other                   |
| ID56308         | TPM2                 | -1,375             | -1,667              | -1,428              | -1,631            | -1,516            | -1,318            | TPM2                     | tropomyosin 2 (beta)                                    | cytoplasm              | other                   |
| ID1372          | TPM3, TPM4           | -1,567             | -1,784              | -1,518              | -1,738            | -1,489            | -1,339            | TPM3                     | tropomyosin 3                                           | cytoplasm              | other                   |
| ID1369          | TPM4                 | -1,227             | -1,507              | -1,328              | -1,540            | -1,516            | -1,410            | TPM4                     | tropomyosin 4                                           | cytoplasm              | other                   |
| ID1153          | TRA2B, CSN4          | -2,079             | -2,494              | -1,890              | -1,503            | -1,425            | -1,367            | TRA2B                    | transformer-2 protein homolog beta                      | nucleus                |                         |
| ID688           | TRFL                 | 1,665              | 2,537               | 1,932               | 1,743             | 2,541             | 2,003             | LTF                      | lactotransferrin                                        | extracellular space    | peptidase               |
| ID751           | TRXR1                | 1,901              | 3,635               | 1,900               | 3,353             | 3,520             | 2,715             | TXNRD1                   | thioredoxin reductase 1                                 | cytoplasm              | enzyme                  |
| ID837           | TRXR1                | -1,190             | -1,094              | -1,174              | -7,868            | -1,008            | 1,086             | TXNRD1                   | thioredoxin reductase 1                                 | cytoplasm              | enzyme                  |
| ID849           | TRXR1                | -1,377             | -1,450              | -1,371              | -4,368            | -1,193            | -1,063            | TXNRD1                   | thioredoxin reductase 1                                 | cytoplasm              | enzyme                  |
| ID1335          | TSNAX                | 1,271              | 1,429               | 1,332               | -1,118            | 1,518             | 1,168             | TSNAX                    | translin-associated factor X                            | nucleus                | transporter             |
| ID203683        | TXND5, ACL6A         | 1,179              | 1,329               | 1,223               | 2,696             | 1,369             | 1,680             | TXNDC5                   | thioredoxin domain containing 5 (endoplasmic reticulum) | cytoplasm              | enzyme                  |
| ID992           | TXND5, ACL6A         | 1,091              | 1,040               | 1,028               | -1,746            | -1,934            | -1,472            | TXNDC5                   | thioredoxin domain containing 5 (endoplasmic reticulum) | cytoplasm              | enzyme                  |
| ID977           | TXND5, HNRPF         | 1,346              | 1,143               | 1,305               | 1,156             | -1,392            | -1,519            | TXNDC5                   | thioredoxin domain containing 5 (endoplasmic reticulum) | cytoplasm              | enzyme                  |
| ID13083         | TXND5, SH3G1         | -2,650             | -2,873              | -1,740              | -1,759            | -1,771            | -1,643            | TXNDC5                   | thioredoxin domain containing 5 (endoplasmic reticulum) | cytoplasm              | enzyme                  |
| ID1269          | TXNL1, ANXA2         | -1,460             | -1,717              | -1,297              | -1,328            | -1,273            | -1,121            | TXNL1                    | thioredoxin-like protein 1                              | nucleus                |                         |
| ID16669         | TXNL5                | -1,852             | -1,882              | -1,417              | -1,459            | -1,314            | 2,131             | TXNDC17                  | thioredoxin domain containing 17                        | cytoplasm              | enzyme                  |
| ID1358          | UBA1, 3HIDH          | -1,407             | -1,453              | -1,337              | -1,897            | -2,149            | -2,097            | UBA1                     | ubiquitin-like modifier activating enzyme 1             | cytoplasm              | enzyme                  |
| ID478           | UBA1, TIF1B          | -1,643             | -2,179              | -1,969              | -2,487            | -1,874            | -1,787            | UBA1                     | ubiquitin-like modifier activating enzyme 1             | cytoplasm              | enzyme                  |
| ID469           | UBA1, TIF1B          | -1,807             | -2,550              | -2,240              | -2,363            | -1,868            | -1,613            | UBA1                     | ubiquitin-like modifier activating enzyme 1             | cytoplasm              | enzyme                  |
| ID3542          | UBA5                 | -1,372             | -1,823              | -1,545              | -3,009            | -1,991            | -1,834            | UBA5                     | ubiquitin-like modifier activating enzyme 5             | cytoplasm              | enzyme                  |
| ID1116          | UBCP1                | -1,718             | -1,920              | -1,619              | -3,108            | -1,272            | -1,322            | UBLCP1                   | ubiquitin-like domain containing CTD phosphatase 1      | unknown                | phosphatase             |

Table S-2

| ID <sup>1</sup> | Protein <sup>2</sup> | 0 min <sup>3</sup> | 30 min <sup>3</sup> | 60 min <sup>3</sup> | 24 h <sup>3</sup> | 48 h <sup>3</sup> | 72 h <sup>3</sup> | IPA symbol <sup>4</sup> | Entrez gene name <sup>5</sup>                                   | location <sup>6</sup> | type(s) <sup>7</sup> |
|-----------------|----------------------|--------------------|---------------------|---------------------|-------------------|-------------------|-------------------|-------------------------|-----------------------------------------------------------------|-----------------------|----------------------|
| ID554833        | UBE1                 | -1,924             | -2,603              | -2,309              | -3,087            | -2,068            | -1,788            | UBA1                    | ubiquitin-like modifier activating enzyme 1                     | cytoplasm             | enzyme               |
| ID466           | UBE1, MVP, UBA1      | -2,128             | -2,435              | -2,096              | -2,666            | -1,815            | -1,562            | UBA2                    | ubiquitin-like modifier activating enzyme 2                     | cytoplasm             | enzyme               |
| ID818           | UBP14                | -1,884             | -2,057              | -1,777              | -1,463            | -1,428            | -1,260            | USP14                   | ubiquitin specific peptidase 14 (tRNA-guanine transglycosylase) | cytoplasm             | peptidase            |
| ID545           | UBP5                 | -2,267             | -2,503              | -1,967              | -1,739            | -1,551            | -1,388            | USP5                    | ubiquitin specific peptidase 5 (isopeptidase T)                 | cytoplasm             | peptidase            |
| ID550           | UBP5, P3H1           | -2,314             | -2,584              | -2,106              | -2,026            | -1,722            | -1,609            | USP5                    | ubiquitin specific peptidase 5 (isopeptidase T)                 | cytoplasm             | peptidase            |
| ID764           | UBQL1                | 1,817              | 3,644               | 2,037               | 4,243             | 4,269             | 3,136             | UBQLN1                  | ubiquilin 1                                                     | cytoplasm             | other                |
| ID1491          | UCHL1                | -1,286             | -1,335              | -1,164              | -1,509            | -1,309            | -1,132            | UCHL1                   | ubiquitin carboxyl-terminal hydrolase isozyme L1                | cytoplasm             | enzyme               |
| ID809           | ULA1                 | -1,828             | -2,181              | -2,238              | -1,844            | -1,627            | -1,454            | NAE1                    | NEDD8 activating enzyme E1 subunit 1                            | cytoplasm             | enzyme               |
| ID201269        | UQCRC1, HNRPK        | -6,335             | -6,081              | -6,065              | -2,112            | -2,464            | -2,063            | UQCRC1                  | ubiquinol-cytochrome c reductase core protein I                 | cytoplasm             | enzyme               |
| ID1031          | VAT1                 | -1,261             | -1,610              | -1,595              | -38,976           | -1,528            | -1,344            | VAT1                    | vesicle amine transport protein 1 homolog (T. californica)      | plasma membrane       | transporter          |
| ID1044          | VIME                 | 2,021              | 1,445               | 2,325               | 1,193             | 1,354             | 1,489             | VIM                     | vimentin                                                        | cytoplasm             | other                |
| ID975           | VIME                 | 1,611              | 1,116               | 1,345               | 1,054             | -1,002            | 1,344             | VIM                     | vimentin                                                        | cytoplasm             | other                |
| ID432           | VINC                 | -1,387             | -1,696              | -1,471              | -2,091            | -1,565            | -1,502            | VCL                     | vinculin                                                        | plasma membrane       | enzyme               |
| ID431           | VINC                 | -1,251             | -1,719              | -1,659              | -2,122            | -1,815            | -1,784            | VCL                     | vinculin                                                        | plasma membrane       | enzyme               |
| ID433           | VINC                 | -1,542             | -1,879              | -1,726              | -483,662          | -1,828            | -1,466            | VCL                     | vinculin                                                        | plasma membrane       | enzyme               |
| ID2117397       | VINC                 | -1,835             | -1,932              | -1,603              | -6,743            | -33,535           | -12,949           | VCL                     | vinculin                                                        | plasma membrane       | enzyme               |
| ID1325          | WDR61, ANXA5         | -1,056             | -1,133              | -1,139              | -1,358            | -1,541            | -1,666            | WDR61                   | WD repeat-containing protein 61                                 | nucleus               | other                |
| ID3403522       |                      | 4,392              | 43,135              | 3,884               | -5,293            | 1,110             | 1,102             |                         |                                                                 |                       |                      |
| ID140457        |                      | 5,832              | 28,192              | 3,773               | -1,660            | -1,688            | -1,427            |                         |                                                                 |                       |                      |
| ID2728784       |                      | 9,852              | 19,044              | 5,490               | 1,229             | 2,525             | 1,248             |                         |                                                                 |                       |                      |
| ID1623          |                      | 1,753              | 18,442              | 4,971               | -29,164           | -10,264           | -1,846            |                         |                                                                 |                       |                      |
| ID2722863       |                      | 13,379             | 18,382              | 9,646               | -16,672           | 1,388             | -9,593            |                         |                                                                 |                       |                      |
| ID3763473       |                      | 2,705              | 17,130              | 3,716               | -1,665            | 1,470             | 1,054             |                         |                                                                 |                       |                      |
| ID1915149       |                      | 14,907             | 14,980              | 8,517               | -2,318            | 35,333            | 1,354             |                         |                                                                 |                       |                      |
| ID582           |                      | 8,367              | 13,063              | 16,629              | 3,516             | 3,185             | -2,027            |                         |                                                                 |                       |                      |
| ID1721          |                      | 1,580              | 12,368              | 2,232               | -1,700            | 1,700             | 3,906             |                         |                                                                 |                       |                      |
| ID1814025       |                      | 99,866             | 9,002               | 3,374               | 3,308             | n.d.              | -2,634            |                         |                                                                 |                       |                      |
| ID343050        |                      | 2,206              | 8,228               | 2,982               | -1,624            | -1,082            | 1,163             |                         |                                                                 |                       |                      |
| ID1212          |                      | 3,914              | 7,686               | 6,210               | 1,494             | 4,287             | 2,379             |                         |                                                                 |                       |                      |
| ID1719          |                      | 2,516              | 7,627               | 2,281               | -1,330            | -1,035            | -1,543            |                         |                                                                 |                       |                      |
| ID1987569       |                      | 2,566              | 7,326               | 5,327               | -3,432            | -1,582            | 3,597             |                         |                                                                 |                       |                      |
| ID581           |                      | 3,083              | 7,272               | 3,438               | 3,641             | 3,983             | -4,728            |                         |                                                                 |                       |                      |
| ID2142601       |                      | 4,095              | 6,712               | 2,015               | 1,392             | -1,054            | -13,536           |                         |                                                                 |                       |                      |
| ID1811207       |                      | 7,264              | 6,416               | 4,375               | 1,747             | 10,757            | 2,179             |                         |                                                                 |                       |                      |
| ID2202941       |                      | 8,074              | 5,849               | 9,939               | -2,139            | 1,225             | -2,080            |                         |                                                                 |                       |                      |
| ID730           |                      | 1,666              | 5,695               | 1,855               | 2,252             | 1,851             | 6,437             |                         |                                                                 |                       |                      |
| ID1846930       |                      | 2,438              | 5,619               | 6,523               | 1,961             | -1,232            | 1,926             |                         |                                                                 |                       |                      |
| ID3549612       |                      | 2,715              | 5,178               | 3,080               | 4,840             | 4,092             | 3,675             |                         |                                                                 |                       |                      |
| ID1559          |                      | 6,268              | 4,953               | 7,207               | 2,480             | 1,540             | 1,206             |                         |                                                                 |                       |                      |
| ID337908        |                      | 1,359              | 4,877               | 1,857               | 2,206             | 3,360             | 2,010             |                         |                                                                 |                       |                      |
| ID587           |                      | 4,752              | 4,670               | 7,982               | 2,106             | 1,997             | -1,632            |                         |                                                                 |                       |                      |
| ID3091679       |                      | 13,220             | 4,566               | -1,008              | 2,050             | -1,027            | -1,556            |                         |                                                                 |                       |                      |
| ID2729506       |                      | 2,059              | 4,563               | 2,031               | 6,326             | 5,512             | 3,242             |                         |                                                                 |                       |                      |
| ID42780         |                      | 1,936              | 4,549               | 2,026               | 3,993             | 3,365             | 3,392             |                         |                                                                 |                       |                      |
| ID750           |                      | 1,988              | 4,352               | 1,950               | 2,805             | 3,342             | 4,007             |                         |                                                                 |                       |                      |
| ID43156         |                      | 2,030              | 4,334               | 2,340               | 5,660             | 3,806             | 2,934             |                         |                                                                 |                       |                      |
| ID132415        |                      | 2,158              | 4,057               | 2,440               | 4,151             | 4,233             | 3,634             |                         |                                                                 |                       |                      |
| ID1082          |                      | 8,338              | 3,962               | 2,583               | 1,273             | -1,064            | -1,424            |                         |                                                                 |                       |                      |
| ID754           |                      | 2,015              | 3,928               | 2,154               | 3,090             | 3,136             | 2,923             |                         |                                                                 |                       |                      |
| ID1802534       |                      | 1,631              | 3,896               | 1,610               | 1,803             | 1,754             | -1,489            |                         |                                                                 |                       |                      |
| ID3479720       |                      | 2,427              | 3,892               | 3,617               | 4,202             | 7,588             | 2,626             |                         |                                                                 |                       |                      |
| ID742           |                      | 1,640              | 3,887               | 2,055               | 1,783             | 1,312             | 2,025             |                         |                                                                 |                       |                      |
| ID776           |                      | 1,832              | 3,881               | 2,042               | 4,819             | 4,482             | 3,459             |                         |                                                                 |                       |                      |
| ID1739          |                      | 1,267              | 3,825               | 1,861               | -10,252           | -1,492            | -3,014            |                         |                                                                 |                       |                      |
| ID1338          |                      | 1,930              | 3,773               | 2,116               | -5,356            | 5,338             | 2,847             |                         |                                                                 |                       |                      |
| ID135817        |                      | 2,166              | 3,733               | 1,881               | -1,378            | -1,226            | 1,128             |                         |                                                                 |                       |                      |
| ID3179          |                      | 1,695              | 3,710               | 2,061               | 3,484             | 3,226             | 2,696             |                         |                                                                 |                       |                      |
| ID2158110       |                      | 3,651              | 3,602               | 9,767               | 1,119             | -1,165            | -1,208            |                         |                                                                 |                       |                      |
| ID1475          |                      | 2,317              | 3,562               | 2,237               | 1,560             | 1,164             | 1,590             |                         |                                                                 |                       |                      |

Table S-2

| ID <sup>1</sup> | Protein <sup>2</sup> | 0 min <sup>3</sup> | 30 min <sup>3</sup> | 60 min <sup>3</sup> | 24 h <sup>3</sup> | 48 h <sup>3</sup> | 72 h <sup>3</sup> | IPA symbol <sup>4</sup> | Entrez gene name <sup>5</sup> | location <sup>6</sup> | type(s) <sup>7</sup> |
|-----------------|----------------------|--------------------|---------------------|---------------------|-------------------|-------------------|-------------------|-------------------------|-------------------------------|-----------------------|----------------------|
| ID29087         |                      | 1,828              | 3,552               | 1,952               | 3,993             | 3,804             | 2,723             |                         |                               |                       |                      |
| ID40401         |                      | 1,752              | 3,439               | 1,991               | 3,933             | 3,284             | 2,931             |                         |                               |                       |                      |
| ID41097         |                      | 1,805              | 3,348               | 2,012               | 4,297             | 3,560             | 1,919             |                         |                               |                       |                      |
| ID749           |                      | 2,015              | 3,308               | 1,978               | 2,237             | 2,361             | 2,211             |                         |                               |                       |                      |
| ID756           |                      | 1,853              | 3,280               | 1,991               | 2,817             | 2,871             | 2,339             |                         |                               |                       |                      |
| ID147614        |                      | 7,479              | 3,278               | 1,231               | 1,107             | 1,051             | -2,016            |                         |                               |                       |                      |
| ID1799192       |                      | 1,633              | 3,235               | 1,789               | 2,325             | 1,962             | -1,386            |                         |                               |                       |                      |
| ID578           |                      | 2,545              | 3,188               | 3,045               | 1,024             | -1,229            | -1,385            |                         |                               |                       |                      |
| ID1720          |                      | -2,343             | 3,126               | 1,115               | -6,148            | -31,562           | -52,177           |                         |                               |                       |                      |
| ID237648        |                      | 1,723              | 3,078               | 1,736               | 3,113             | 3,162             | 1,251             |                         |                               |                       |                      |
| ID1800806       |                      | -4,605             | 3,060               | -1,694              | n.d.              | -168,126          | -4,456            |                         |                               |                       |                      |
| ID713           |                      | 1,623              | 3,048               | 1,775               | 3,185             | 3,287             | 2,489             |                         |                               |                       |                      |
| ID17707         |                      | 1,338              | 3,004               | 1,722               | 2,386             | 2,164             | 1,090             |                         |                               |                       |                      |
| ID719           |                      | 1,767              | 2,993               | 1,812               | 2,512             | 2,139             | 2,399             |                         |                               |                       |                      |
| ID1761          |                      | 1,350              | 2,958               | 1,037               | 2,203             | 1,242             | -1,686            |                         |                               |                       |                      |
| ID785           |                      | 1,916              | 2,954               | 2,348               | 3,782             | 3,821             | 2,551             |                         |                               |                       |                      |
| ID732           |                      | 1,527              | 2,948               | 1,902               | 1,782             | 1,346             | -1,905            |                         |                               |                       |                      |
| ID782           |                      | 1,737              | 2,945               | 1,695               | 2,956             | 3,084             | 2,361             |                         |                               |                       |                      |
| ID266132        |                      | 1,719              | 2,942               | 1,744               | 1,642             | 1,821             | 2,232             |                         |                               |                       |                      |
| ID2889441       |                      | 3,990              | 2,898               | 4,331               | 1,368             | 1,573             | -1,314            |                         |                               |                       |                      |
| ID102094        |                      | 1,422              | 2,860               | 1,544               | 4,351             | 3,326             | 2,716             |                         |                               |                       |                      |
| ID866           |                      | 2,086              | 2,857               | 1,957               | -2,070            | 1,692             | 1,620             |                         |                               |                       |                      |
| ID3761682       |                      | 1,332              | 2,850               | 2,055               | -1,020            | 1,675             | -1,739            |                         |                               |                       |                      |
| ID769           |                      | 1,722              | 2,847               | 1,844               | 3,764             | 3,634             | 2,757             |                         |                               |                       |                      |
| ID731           |                      | 1,577              | 2,835               | 1,636               | 1,581             | 1,125             | -2,224            |                         |                               |                       |                      |
| ID1843456       |                      | 2,317              | 2,826               | 2,086               | -2,778            | 1,777             | 8,005             |                         |                               |                       |                      |
| ID416           |                      | 1,687              | 2,816               | 1,802               | 2,024             | 3,426             | 1,286             |                         |                               |                       |                      |
| ID773           |                      | 1,614              | 2,783               | 1,549               | 2,739             | 2,585             | 2,093             |                         |                               |                       |                      |
| ID916           |                      | 1,953              | 2,772               | 2,169               | 3,850             | 3,682             | 2,689             |                         |                               |                       |                      |
| ID841           |                      | 1,984              | 2,760               | 2,222               | 4,307             | 4,020             | 2,805             |                         |                               |                       |                      |
| ID2150207       |                      | 3,835              | 2,735               | 3,040               | -1,519            | 2,237             | -2,693            |                         |                               |                       |                      |
| ID7425          |                      | 1,811              | 2,684               | 1,786               | 1,945             | 2,101             | 1,118             |                         |                               |                       |                      |
| ID2183          |                      | 1,739              | 2,664               | 1,991               | 2,508             | 2,795             | 2,172             |                         |                               |                       |                      |
| ID1466          |                      | 2,751              | 2,655               | 3,516               | 2,020             | 1,820             | 1,521             |                         |                               |                       |                      |
| ID759           |                      | 1,675              | 2,642               | 2,113               | 3,467             | 3,413             | 2,409             |                         |                               |                       |                      |
| ID1566          |                      | 1,402              | 2,626               | 2,628               | 1,028             | 1,871             | 1,337             |                         |                               |                       |                      |
| ID124300        |                      | 1,409              | 2,607               | 1,517               | 3,086             | 2,491             | 1,780             |                         |                               |                       |                      |
| ID858           |                      | 1,680              | 2,582               | 1,936               | 2,696             | 2,651             | 2,043             |                         |                               |                       |                      |
| ID413           |                      | 1,648              | 2,575               | 1,732               | 3,035             | 3,111             | 1,675             |                         |                               |                       |                      |
| ID748           |                      | 1,711              | 2,572               | 2,095               | 3,674             | 3,848             | 2,716             |                         |                               |                       |                      |
| ID352255        |                      | 1,758              | 2,567               | 1,856               | 1,735             | 2,491             | 2,279             |                         |                               |                       |                      |
| ID407           |                      | 1,774              | 2,562               | 1,823               | 2,296             | 2,142             | 1,272             |                         |                               |                       |                      |
| ID2148299       |                      | 3,260              | 2,553               | 2,344               | -1,531            | 1,753             | -3,077            |                         |                               |                       |                      |
| ID3483954       |                      | 1,666              | 2,486               | 2,100               | 2,486             | 2,359             | 1,869             |                         |                               |                       |                      |
| ID41789         |                      | 1,531              | 2,480               | 1,722               | 2,332             | 1,897             | -1,020            |                         |                               |                       |                      |
| ID1844173       |                      | 2,203              | 2,477               | 2,683               | 2,209             | 2,664             | 2,303             |                         |                               |                       |                      |
| ID1683          |                      | 23,914             | 2,470               | 8,518               | 3,232             | 7,080             | 6,128             |                         |                               |                       |                      |
| ID265686        |                      | 1,477              | 2,462               | 1,350               | 1,838             | 2,493             | 3,473             |                         |                               |                       |                      |
| ID1841741       |                      | 1,535              | 2,453               | 1,580               | 1,238             | 2,699             | 5,453             |                         |                               |                       |                      |
| ID775           |                      | 1,514              | 2,430               | 1,437               | 2,817             | 2,394             | 1,883             |                         |                               |                       |                      |
| ID2033833       |                      | 1,908              | 2,387               | 1,905               | 2,231             | 2,363             | -1,655            |                         |                               |                       |                      |
| ID1464          |                      | -1,572             | 2,373               | -1,422              | -4,499            | 1,013             | 2,351             |                         |                               |                       |                      |
| ID246907        |                      | 1,023              | 2,362               | -1,317              | 16,713            | 2,678             | 1,857             |                         |                               |                       |                      |
| ID3485928       |                      | 2,168              | 2,361               | 2,062               | 3,493             | 1,673             | 1,242             |                         |                               |                       |                      |
| ID747           |                      | 1,621              | 2,349               | 1,923               | 3,694             | 3,944             | 2,731             |                         |                               |                       |                      |
| ID3477702       |                      | 1,711              | 2,348               | 2,109               | 3,873             | 4,575             | 2,653             |                         |                               |                       |                      |
| ID7589          |                      | 1,724              | 2,336               | 1,594               | 2,236             | 1,795             | -1,004            |                         |                               |                       |                      |
| ID509563        |                      | -1,675             | 2,304               | 1,314               | n.d.              | -2,201            | -1,103            |                         |                               |                       |                      |
| ID412           |                      | 1,491              | 2,298               | 1,588               | 2,754             | 2,453             | 1,358             |                         |                               |                       |                      |

Table S-2

| ID <sup>1</sup> | Protein <sup>2</sup> | 0 min <sup>3</sup> | 30 min <sup>3</sup> | 60 min <sup>3</sup> | 24 h <sup>3</sup> | 48 h <sup>3</sup> | 72 h <sup>3</sup> | IPA symbol <sup>4</sup> | Entrez gene name <sup>5</sup> | location <sup>6</sup> | type(s) <sup>7</sup> |
|-----------------|----------------------|--------------------|---------------------|---------------------|-------------------|-------------------|-------------------|-------------------------|-------------------------------|-----------------------|----------------------|
| ID1814782       |                      | -1,067             | 2,274               | 2,279               | 3,383             | 3,541             | 2,763             |                         |                               |                       |                      |
| ID1490          |                      | -1,558             | 2,271               | -3,098              | -1,680            | 1,189             | 3,727             |                         |                               |                       |                      |
| ID802           |                      | 1,643              | 2,251               | 2,069               | 2,905             | 2,149             | 1,373             |                         |                               |                       |                      |
| ID108562        |                      | 1,535              | 2,247               | 1,521               | 1,823             | 1,702             | 2,240             |                         |                               |                       |                      |
| ID419           |                      | 1,503              | 2,237               | 1,532               | 3,009             | 2,780             | 1,315             |                         |                               |                       |                      |
| ID1178          |                      | 1,054              | 2,226               | -1,345              | 1,073             | 2,756             | 1,213             |                         |                               |                       |                      |
| ID2108161       |                      | -1,391             | 2,193               | -1,281              | -2,333            | -10,038           | -3,816            |                         |                               |                       |                      |
| ID238040        |                      | 1,347              | 2,180               | 1,591               | 1,878             | 1,927             | 1,313             |                         |                               |                       |                      |
| ID2330          |                      | 2,279              | 2,175               | 2,390               | -1,231            | 1,529             | 1,638             |                         |                               |                       |                      |
| ID2209869       |                      | 2,330              | 2,151               | 2,032               | 1,130             | -1,322            | -1,191            |                         |                               |                       |                      |
| ID2997219       |                      | 1,358              | 2,136               | 1,584               | -1,875            | 1,058             | -1,435            |                         |                               |                       |                      |
| ID722           |                      | 1,650              | 2,130               | 1,786               | 3,789             | 4,180             | 2,727             |                         |                               |                       |                      |
| ID3762296       |                      | 1,538              | 2,121               | 1,829               | 2,369             | 2,677             | 1,896             |                         |                               |                       |                      |
| ID1532          |                      | -1,115             | 2,109               | -1,215              | -18,491           | -2,625            | -13,015           |                         |                               |                       |                      |
| ID3761695       |                      | 3,580              | 2,096               | 4,576               | -1,464            | 1,414             | -1,913            |                         |                               |                       |                      |
| ID1451          |                      | 1,058              | 2,079               | 1,128               | -11,287           | -2,711            | -77,659           |                         |                               |                       |                      |
| ID418           |                      | 1,461              | 2,077               | 1,545               | 2,966             | 3,036             | 1,503             |                         |                               |                       |                      |
| ID268600        |                      | 5,843              | 2,076               | 4,300               | 1,512             | 1,097             | -2,462            |                         |                               |                       |                      |
| ID1193          |                      | 6,969              | 2,072               | -1,138              | -4,526            | 1,324             | 1,810             |                         |                               |                       |                      |
| ID2035512       |                      | -1,032             | 2,042               | -1,342              | -1,250            | 1,513             | -2,684            |                         |                               |                       |                      |
| ID185509        |                      | 1,805              | 2,039               | 1,824               | -1,308            | -1,426            | -1,801            |                         |                               |                       |                      |
| ID267419        |                      | 1,570              | 2,036               | -1,065              | 1,125             | 1,248             | 2,183             |                         |                               |                       |                      |
| ID394           |                      | 1,405              | 2,016               | 1,587               | 2,099             | 1,745             | 1,140             |                         |                               |                       |                      |
| ID3413662       |                      | 1,862              | 2,009               | 1,020               | 1,013             | -1,185            | -2,054            |                         |                               |                       |                      |
| ID3078712       |                      | 1,982              | 1,987               | 2,964               | 1,208             | 1,199             | 1,548             |                         |                               |                       |                      |
| ID2880272       |                      | 3,348              | 1,974               | 2,597               | 1,706             | -1,138            | -2,471            |                         |                               |                       |                      |
| ID1871260       |                      | -1,129             | 1,913               | -1,828              | -2,807            | 1,339             | -1,031            |                         |                               |                       |                      |
| ID1470          |                      | 1,037              | 1,884               | -1,524              | -7,285            | -6,953            | -14,322           |                         |                               |                       |                      |
| ID1867746       |                      | 1,024              | 1,883               | -1,050              | -1,053            | 2,823             | 1,606             |                         |                               |                       |                      |
| ID2340727       |                      | -1,071             | 1,857               | -1,073              | -1,822            | 1,199             | 1,273             |                         |                               |                       |                      |
| ID2037342       |                      | 1,532              | 1,839               | 1,322               | 1,061             | 1,114             | -2,165            |                         |                               |                       |                      |
| ID43845         |                      | 1,495              | 1,814               | 1,749               | 2,082             | 1,147             | -1,003            |                         |                               |                       |                      |
| ID1094          |                      | 1,483              | 1,813               | -2,530              | 1,065             | -1,731            | -2,011            |                         |                               |                       |                      |
| ID392           |                      | 1,298              | 1,811               | 1,527               | 1,847             | 1,648             | 1,038             |                         |                               |                       |                      |
| ID3763073       |                      | 1,664              | 1,782               | 1,790               | -1,044            | -1,170            | -2,099            |                         |                               |                       |                      |
| ID2990527       |                      | 1,475              | 1,780               | 1,571               | -1578,241         | -19972,176        | n.d.              |                         |                               |                       |                      |
| ID1840030       |                      | 1,254              | 1,770               | 1,304               | 1,798             | 2,428             | 8,817             |                         |                               |                       |                      |
| ID39482         |                      | 1,447              | 1,754               | 1,368               | 2,098             | 2,339             | 1,145             |                         |                               |                       |                      |
| ID1989367       |                      | 1,502              | 1,751               | 1,596               | 1,626             | -1,019            | 1,887             |                         |                               |                       |                      |
| ID423           |                      | 1,212              | 1,704               | 1,382               | 1,825             | 1,581             | 1,125             |                         |                               |                       |                      |
| ID3762817       |                      | 1,290              | 1,700               | 1,066               | 1,116             | 1,303             | -1,292            |                         |                               |                       |                      |
| ID1795          |                      | 1,155              | 1,685               | -1,114              | 1,234             | -1,338            | -1,661            |                         |                               |                       |                      |
| ID9044          |                      | 1,207              | 1,676               | 1,344               | 1,930             | 1,754             | 1,122             |                         |                               |                       |                      |
| ID987           |                      | -2,996             | 1,668               | 1,172               | -1,930            | -1,348            | -1,303            |                         |                               |                       |                      |
| ID258601        |                      | 1,268              | 1,616               | 2,231               | -2,363            | -1,812            | -1,485            |                         |                               |                       |                      |
| ID729           |                      | 1,561              | 1,614               | 1,348               | 1,856             | 1,501             | 1,355             |                         |                               |                       |                      |
| ID1520          |                      | 1,581              | 1,603               | 1,997               | 1,104             | -1,003            | -1,147            |                         |                               |                       |                      |
| ID12822         |                      | 1,141              | 1,595               | 1,245               | -1,554            | 1,059             | 1,384             |                         |                               |                       |                      |
| ID3497145       |                      | 1,418              | 1,540               | 1,317               | -2,990            | -4,855            | -18,080           |                         |                               |                       |                      |
| ID49585         |                      | 1,407              | 1,528               | 1,636               | 1,633             | 1,815             | 1,456             |                         |                               |                       |                      |
| ID3762592       |                      | 1,820              | 1,523               | 1,318               | -1,117            | -1,140            | -1,159            |                         |                               |                       |                      |
| ID45562         |                      | 1,487              | 1,515               | 1,332               | 1,284             | 1,428             | 1,081             |                         |                               |                       |                      |
| ID181505        |                      | 1,440              | 1,514               | 1,251               | 1,378             | 1,094             | 1,151             |                         |                               |                       |                      |
| ID3499167       |                      | 1,411              | 1,501               | 1,278               | n.d.              | n.d.              | n.d.              |                         |                               |                       |                      |
| ID1410          |                      | -1,051             | 1,492               | -1,294              | -1,403            | -2,018            | -2,271            |                         |                               |                       |                      |
| ID2214          |                      | 1,202              | 1,488               | 1,272               | -2,119            | -1,471            | -1,807            |                         |                               |                       |                      |
| ID3170569       |                      | 1,660              | 1,480               | 1,429               | 1,160             | -1,173            | -1,166            |                         |                               |                       |                      |
| ID898           |                      | 1,206              | 1,471               | 1,357               | 1,785             | 1,594             | 1,289             |                         |                               |                       |                      |
| ID1814733       |                      | 1,090              | 1,458               | 1,466               | 2,797             | -1,305            | -2,191            |                         |                               |                       |                      |

Table S-2

| ID <sup>1</sup> | Protein <sup>2</sup> | 0 min <sup>3</sup> | 30 min <sup>3</sup> | 60 min <sup>3</sup> | 24 h <sup>3</sup> | 48 h <sup>3</sup> | 72 h <sup>3</sup> | IPA symbol <sup>4</sup> | Entrez gene name <sup>5</sup> | location <sup>6</sup> | type(s) <sup>7</sup> |
|-----------------|----------------------|--------------------|---------------------|---------------------|-------------------|-------------------|-------------------|-------------------------|-------------------------------|-----------------------|----------------------|
| ID3062814       |                      | 1,183              | 1,456               | 1,115               | -1,112            | -1,789            | -1,675            |                         |                               |                       |                      |
| ID1600          |                      | 1,017              | 1,454               | 1,053               | -1,565            | -1,556            | -1,086            |                         |                               |                       |                      |
| ID715           |                      | 1,446              | 1,449               | 1,278               | 2,978             | 3,232             | 2,431             |                         |                               |                       |                      |
| ID589226        |                      | 1,260              | 1,424               | 1,516               | 1,264             | 1,803             | 1,331             |                         |                               |                       |                      |
| ID406           |                      | 1,305              | 1,379               | 1,282               | 1,238             | 1,565             | 1,171             |                         |                               |                       |                      |
| ID1570          |                      | 1,078              | 1,377               | 1,267               | -4,577            | 1,823             | 1,097             |                         |                               |                       |                      |
| ID437           |                      | 1,061              | 1,376               | 1,137               | 1,580             | 1,572             | 1,016             |                         |                               |                       |                      |
| ID307           |                      | 1,848              | 1,366               | n.d.                | n.d.              | -1,645            | -3,182            |                         |                               |                       |                      |
| ID11611         |                      | 2,381              | 1,343               | 3,269               | -1,235            | -2,506            | -6,119            |                         |                               |                       |                      |
| ID1187          |                      | 1,519              | 1,336               | 1,237               | 1,049             | 1,107             | 1,181             |                         |                               |                       |                      |
| ID3432480       |                      | -1,034             | 1,330               | 1,024               | 2,429             | 2,097             | 1,878             |                         |                               |                       |                      |
| ID3763695       |                      | 5,514              | 1,330               | 9,614               | 1,979             | 1,421             | 2,549             |                         |                               |                       |                      |
| ID57776         |                      | 1,337              | 1,329               | 1,369               | 2,070             | 1,216             | -1,034            |                         |                               |                       |                      |
| ID431675        |                      | 1,905              | 1,329               | 2,193               | 4,011             | 1,649             | 1,438             |                         |                               |                       |                      |
| ID1985723       |                      | 2,107              | 1,323               | 1,146               | -2,818            | -2,297            | -1,886            |                         |                               |                       |                      |
| ID3765751       |                      | 1,138              | 1,322               | -1,142              | -1,217            | -1,546            | -1,311            |                         |                               |                       |                      |
| ID2354041       |                      | 1,248              | 1,312               | 1,337               | 1,689             | 1,005             | -1,005            |                         |                               |                       |                      |
| ID1980208       |                      | 1,117              | 1,309               | 1,582               | -8,343            | -1,028            | -2,075            |                         |                               |                       |                      |
| ID1821608       |                      | 1,172              | 1,306               | 1,203               | 1,697             | 1,426             | -1,145            |                         |                               |                       |                      |
| ID1313          |                      | 1,161              | 1,301               | 1,445               | -8,502            | -8,577            | -65,885           |                         |                               |                       |                      |
| ID1782          |                      | -1,364             | 1,267               | -1,383              | 1,596             | -1,892            | -1,807            |                         |                               |                       |                      |
| ID1994828       |                      | 1,404              | 1,251               | 1,227               | -2,373            | 1,301             | 6,608             |                         |                               |                       |                      |
| ID74132         |                      | 1,133              | 1,243               | -1,036              | 2,841             | -1,044            | -1,115            |                         |                               |                       |                      |
| ID3163353       |                      | 1,910              | 1,234               | 1,233               | -1,144            | -1,365            | -1,462            |                         |                               |                       |                      |
| ID500           |                      | -1,637             | 1,228               | -1,181              | -1,610            | -2,134            | -2,278            |                         |                               |                       |                      |
| ID92901         |                      | 1,523              | 1,227               | 1,235               | 2,116             | -1,168            | 1,037             |                         |                               |                       |                      |
| ID1059          |                      | 1,269              | 1,221               | 1,423               | 1,128             | -2,543            | -3,069            |                         |                               |                       |                      |
| ID546917        |                      | -1,031             | 1,214               | -1,100              | 1,578             | 1,061             | -1,482            |                         |                               |                       |                      |
| ID1026          |                      | 1,524              | 1,211               | 1,677               | -2,444            | -3,045            | -3,937            |                         |                               |                       |                      |
| ID2091139       |                      | 1,140              | 1,205               | 1,237               | -1,585            | -1,053            | 1,671             |                         |                               |                       |                      |
| ID2649893       |                      | 1,254              | 1,196               | 1,332               | -1,223            | -1,340            | -1,805            |                         |                               |                       |                      |
| ID1654          |                      | 1,269              | 1,177               | 1,239               | -1,885            | -1,271            | -1,285            |                         |                               |                       |                      |
| ID1499          |                      | 1,114              | 1,172               | -1,208              | -2,337            | -1,778            | -1,266            |                         |                               |                       |                      |
| ID2617667       |                      | -1,182             | 1,165               | -1,247              | -1,101            | -2,310            | -1,012            |                         |                               |                       |                      |
| ID61022         |                      | 1,454              | 1,164               | 1,597               | -1,302            | 1,183             | 1,276             |                         |                               |                       |                      |
| ID1096          |                      | -1,047             | 1,148               | -1,163              | -1,277            | -1,297            | -1,794            |                         |                               |                       |                      |
| ID2152149       |                      | 1,557              | 1,137               | 1,476               | -1,137            | -1,074            | -1,402            |                         |                               |                       |                      |
| ID1816422       |                      | -2,229             | 1,130               | 1,638               | 1,941             | -4,945            | -4,296            |                         |                               |                       |                      |
| ID3668269       |                      | 1,381              | 1,127               | 1,255               | -1,723            | -1,738            | -2,914            |                         |                               |                       |                      |
| ID71445         |                      | 1,142              | 1,126               | 1,296               | 3,880             | 2,761             | 2,765             |                         |                               |                       |                      |
| ID281947        |                      | -1,025             | 1,116               | 2,345               | 1,235             | 1,165             | -1,105            |                         |                               |                       |                      |
| ID3763800       |                      | -1,103             | 1,113               | -1,017              | -9,536            | -5,009            | -19,511           |                         |                               |                       |                      |
| ID1590          |                      | 1,037              | 1,105               | -1,013              | -2,592            | -1,059            | 1,481             |                         |                               |                       |                      |
| ID2740977       |                      | 1,236              | 1,100               | 1,102               | 2,018             | 1,339             | 1,057             |                         |                               |                       |                      |
| ID27793         |                      | -1,189             | 1,095               | -1,126              | -2,368            | -1,628            | -1,202            |                         |                               |                       |                      |
| ID996           |                      | 1,970              | 1,094               | 2,296               | -1,404            | -2,139            | -1,362            |                         |                               |                       |                      |
| ID3275754       |                      | 1,602              | 1,082               | -1,050              | -7,637            | -2,563            | -7,580            |                         |                               |                       |                      |
| ID1819121       |                      | -1,020             | 1,078               | 1,159               | 2,596             | 1,517             | -1,281            |                         |                               |                       |                      |
| ID1028          |                      | -1,847             | 1,060               | 1,209               | 1,417             | 1,163             | 1,104             |                         |                               |                       |                      |
| ID1983973       |                      | 1,135              | 1,056               | 1,352               | 1,125             | -1,342            | -1,846            |                         |                               |                       |                      |
| ID1707          |                      | -1,041             | 1,056               | -1,123              | -35,643           | -1,619            | -5,869            |                         |                               |                       |                      |
| ID1564          |                      | -3,532             | 1,049               | -5,837              | -8,203            | -4,039            | -10,298           |                         |                               |                       |                      |
| ID733           |                      | 1,700              | 1,049               | 3,042               | -5,507            | 1,089             | -2,196            |                         |                               |                       |                      |
| ID193389        |                      | 1,476              | 1,045               | 1,484               | 1,258             | -1,079            | -1,531            |                         |                               |                       |                      |
| ID24119         |                      | 1,018              | 1,044               | -1,020              | -1,525            | -1,443            | -2,133            |                         |                               |                       |                      |
| ID1514          |                      | -1,089             | 1,033               | -1,014              | -2,063            | 1,314             | -1,006            |                         |                               |                       |                      |
| ID351055        |                      | 1,480              | 1,027               | 1,210               | 1,730             | 1,002             | -1,509            |                         |                               |                       |                      |
| ID444662        |                      | 1,080              | 1,004               | -1,011              | 3,536             | 1,413             | 1,886             |                         |                               |                       |                      |
| ID3763676       |                      | 1,069              | 1,004               | 1,661               | -2,489            | -2,097            | -2,973            |                         |                               |                       |                      |

Table S-2

| ID <sup>1</sup> | Protein <sup>2</sup> | 0 min <sup>3</sup> | 30 min <sup>3</sup> | 60 min <sup>3</sup> | 24 h <sup>3</sup> | 48 h <sup>3</sup> | 72 h <sup>3</sup> | IPA symbol <sup>4</sup> | Entrez gene name <sup>5</sup> | location <sup>6</sup> | type(s) <sup>7</sup> |
|-----------------|----------------------|--------------------|---------------------|---------------------|-------------------|-------------------|-------------------|-------------------------|-------------------------------|-----------------------|----------------------|
| ID576672        |                      | 1,005              | -1,010              | -1,296              | -3,383            | -2,042            | 1,048             |                         |                               |                       |                      |
| ID595           |                      | -1,096             | -1,013              | -1,006              | -2,067            | 2,911             | 2,125             |                         |                               |                       |                      |
| ID401246        |                      | -1,025             | -1,024              | 1,209               | 1,679             | 1,562             | -1,199            |                         |                               |                       |                      |
| ID1847793       |                      | -1,053             | -1,025              | 1,210               | -1,988            | -4,699            | -3,599            |                         |                               |                       |                      |
| ID200032        |                      | 1,219              | -1,026              | 1,287               | 1,028             | -1,222            | -1,587            |                         |                               |                       |                      |
| ID2100931       |                      | -1,427             | -1,026              | -1,248              | 7,736             | 3,043             | 1,448             |                         |                               |                       |                      |
| ID211213        |                      | -1,032             | -1,030              | -1,037              | 2,544             | -1,045            | 1,100             |                         |                               |                       |                      |
| ID112515        |                      | 1,039              | -1,030              | -1,138              | -2,567            | -2,181            | -1,887            |                         |                               |                       |                      |
| ID16882         |                      | 1,046              | -1,033              | 1,172               | -1,092            | -1,231            | -1,519            |                         |                               |                       |                      |
| ID3763684       |                      | -1,250             | -1,040              | -1,117              | -1,185            | -1,301            | -1,633            |                         |                               |                       |                      |
| ID1135          |                      | -1,202             | -1,044              | -1,624              | -1,491            | -1,482            | -1,420            |                         |                               |                       |                      |
| ID3046761       |                      | -1,160             | -1,046              | -1,146              | -1,339            | -1,843            | -1,399            |                         |                               |                       |                      |
| ID1935188       |                      | 1,261              | -1,053              | 1,119               | -1,188            | -1,219            | 2,088             |                         |                               |                       |                      |
| ID1197          |                      | 1,141              | -1,053              | -1,121              | -1,841            | -1,267            | -1,399            |                         |                               |                       |                      |
| ID62715         |                      | 1,087              | -1,056              | 1,071               | -1,561            | -1,304            | -1,414            |                         |                               |                       |                      |
| ID473357        |                      | -1,299             | -1,066              | -1,193              | -4,971            | 1,291             | 1,335             |                         |                               |                       |                      |
| ID1461          |                      | -1,069             | -1,068              | 1,036               | -1,983            | -1,018            | -1,641            |                         |                               |                       |                      |
| ID568037        |                      | -1,003             | -1,069              | -1,165              | -1,599            | -1,744            | -1,125            |                         |                               |                       |                      |
| ID290046        |                      | 1,509              | -1,070              | 1,057               | -1,479            | 1,120             | -1,487            |                         |                               |                       |                      |
| ID196961        |                      | -1,230             | -1,070              | -1,353              | -1,748            | -1,529            | -1,715            |                         |                               |                       |                      |
| ID1864541       |                      | -1,721             | -1,075              | -1,267              | -2,750            | -6,661            | -3,245            |                         |                               |                       |                      |
| ID2068580       |                      | 1,104              | -1,077              | -1,018              | 1,367             | -1,329            | -1,977            |                         |                               |                       |                      |
| ID3022983       |                      | 1,070              | -1,078              | -1,003              | -1,448            | -4,418            | -4,177            |                         |                               |                       |                      |
| ID1837103       |                      | 1,043              | -1,081              | -1,272              | 1,811             | 1,766             | 5,773             |                         |                               |                       |                      |
| ID320752        |                      | 1,177              | -1,083              | -1,197              | -1,697            | -1,381            | -1,289            |                         |                               |                       |                      |
| ID7106          |                      | 1,075              | -1,088              | 1,078               | 2,255             | 1,371             | -1,360            |                         |                               |                       |                      |
| ID323167        |                      | 1,055              | -1,088              | -1,331              | -1,576            | -1,548            | -1,573            |                         |                               |                       |                      |
| ID2115505       |                      | -1,033             | -1,093              | -1,345              | -1,980            | -1,324            | -2,785            |                         |                               |                       |                      |
| ID543746        |                      | 1,191              | -1,096              | -1,290              | -1,673            | -1,375            | -1,362            |                         |                               |                       |                      |
| ID2350362       |                      | -1,024             | -1,098              | -1,008              | 1,227             | -1,358            | -1,831            |                         |                               |                       |                      |
| ID1664          |                      | -1,061             | -1,099              | -1,156              | 1,253             | -1,287            | -1,513            |                         |                               |                       |                      |
| ID2102478       |                      | -1,249             | -1,099              | -1,030              | 2,699             | -1,845            | -1,390            |                         |                               |                       |                      |
| ID157378        |                      | 1,102              | -1,114              | 1,036               | -1,515            | -1,442            | -1,067            |                         |                               |                       |                      |
| ID1486          |                      | -1,522             | -1,121              | -1,339              | -2,032            | 1,244             | 2,417             |                         |                               |                       |                      |
| ID523641        |                      | -1,217             | -1,140              | -1,188              | -1,694            | 1,118             | -1,119            |                         |                               |                       |                      |
| ID1286          |                      | 1,192              | -1,144              | -1,238              | -1,152            | -1,308            | -1,534            |                         |                               |                       |                      |
| ID3261240       |                      | -1,055             | -1,147              | -1,040              | -1,840            | -1,401            | -1,522            |                         |                               |                       |                      |
| ID1229          |                      | -1,005             | -1,148              | 1,019               | -1,717            | -1,415            | -1,008            |                         |                               |                       |                      |
| ID426           |                      | 1,006              | -1,153              | 1,061               | -1,622            | 1,042             | -1,266            |                         |                               |                       |                      |
| ID1036          |                      | -1,102             | -1,154              | -1,262              | 1,088             | -1,677            | -1,517            |                         |                               |                       |                      |
| ID1978481       |                      | 1,410              | -1,156              | -1,213              | 1,515             | 1,782             | 1,131             |                         |                               |                       |                      |
| ID11367         |                      | -1,040             | -1,157              | -1,017              | -1,516            | -1,712            | -1,866            |                         |                               |                       |                      |
| ID2215889       |                      | 1,026              | -1,157              | -1,269              | -2,569            | -1,793            | -2,046            |                         |                               |                       |                      |
| ID3040913       |                      | -1,243             | -1,158              | -1,962              | -1,608            | -1,273            | 3,112             |                         |                               |                       |                      |
| ID1062          |                      | -2,204             | -1,166              | -4,768              | -2,811            | -1,749            | -2,171            |                         |                               |                       |                      |
| ID52561         |                      | 1,035              | -1,175              | 1,196               | 1,206             | -1,303            | -1,627            |                         |                               |                       |                      |
| ID438739        |                      | -1,119             | -1,179              | 1,129               | -1,282            | -1,045            | -1,651            |                         |                               |                       |                      |
| ID3761685       |                      | 1,395              | -1,179              | 1,597               | 1,309             | 1,029             | -1,295            |                         |                               |                       |                      |
| ID156308        |                      | -1,103             | -1,196              | -1,129              | -2,618            | -1,588            | -1,437            |                         |                               |                       |                      |
| ID3019322       |                      | -2,007             | -1,200              | -1,049              | -2,246            | -1,315            | -3,089            |                         |                               |                       |                      |
| ID3761675       |                      | -1,386             | -1,202              | -1,272              | -1,751            | -1,584            | -1,475            |                         |                               |                       |                      |
| ID482337        |                      | -1,089             | -1,202              | -1,094              | 2,624             | -1,114            | -1,237            |                         |                               |                       |                      |
| ID348           |                      | 1,022              | -1,203              | -1,270              | -1,482            | -1,291            | -1,787            |                         |                               |                       |                      |
| ID527           |                      | -1,656             | -1,208              | -1,526              | -1,478            | -1,659            | -2,116            |                         |                               |                       |                      |
| ID2447768       |                      | -1,673             | -1,208              | -1,221              | 1,355             | 1,021             | -1,942            |                         |                               |                       |                      |
| ID1762          |                      | 1,175              | -1,212              | -1,068              | -1,635            | -1,534            | -1,554            |                         |                               |                       |                      |
| ID35204         |                      | -1,117             | -1,214              | 1,061               | -4,458            | -1,259            | -1,060            |                         |                               |                       |                      |
| ID463           |                      | -1,884             | -1,216              | -1,646              | -1,093            | 1,315             | -1,004            |                         |                               |                       |                      |
| ID2318312       |                      | -1,970             | -1,218              | 1,178               | -1,263            | -1,605            | -2,600            |                         |                               |                       |                      |

Table S-2

| ID <sup>1</sup> | Protein <sup>2</sup> | 0 min <sup>3</sup> | 30 min <sup>3</sup> | 60 min <sup>3</sup> | 24 h <sup>3</sup> | 48 h <sup>3</sup> | 72 h <sup>3</sup> | IPA symbol <sup>4</sup> | Entrez gene name <sup>5</sup> | location <sup>6</sup> | type(s) <sup>7</sup> |
|-----------------|----------------------|--------------------|---------------------|---------------------|-------------------|-------------------|-------------------|-------------------------|-------------------------------|-----------------------|----------------------|
| ID2016883       |                      | 1,009              | -1,222              | 1,127               | -1,255            | -1,148            | -2,082            |                         |                               |                       |                      |
| ID1819877       |                      | -2,041             | -1,222              | 1,446               | 1,573             | -2,251            | -2,662            |                         |                               |                       |                      |
| ID169541        |                      | 1,134              | -1,223              | -1,134              | -1,208            | -1,865            | -1,959            |                         |                               |                       |                      |
| ID8503          |                      | -1,161             | -1,229              | -1,535              | -1,795            | -1,560            | -1,609            |                         |                               |                       |                      |
| ID364919        |                      | -1,646             | -1,231              | -1,518              | -1,388            | -1,767            | -2,083            |                         |                               |                       |                      |
| ID1793947       |                      | -1,720             | -1,231              | -1,341              | -2,004            | -1,480            | -1,889            |                         |                               |                       |                      |
| ID139104        |                      | -1,024             | -1,232              | -1,207              | -1,178            | -1,294            | -2,045            |                         |                               |                       |                      |
| ID1164          |                      | -1,297             | -1,234              | -1,247              | -1,002            | -1,487            | -1,555            |                         |                               |                       |                      |
| ID516           |                      | -1,299             | -1,237              | -1,134              | -1,305            | -1,635            | -2,291            |                         |                               |                       |                      |
| ID2048120       |                      | -1,012             | -1,240              | 1,150               | 2,463             | -2,321            | -2,026            |                         |                               |                       |                      |
| ID2437          |                      | 1,369              | -1,240              | 2,034               | -2,204            | -1,621            | -1,692            |                         |                               |                       |                      |
| ID1964508       |                      | 1,037              | -1,241              | -1,153              | -1,350            | -1,106            | 2,940             |                         |                               |                       |                      |
| ID121837        |                      | 1,288              | -1,242              | 1,538               | -1,620            | 1,272             | -1,666            |                         |                               |                       |                      |
| ID543455        |                      | -1,298             | -1,243              | -1,249              | 1,621             | -1,259            | -1,586            |                         |                               |                       |                      |
| ID421481        |                      | -1,829             | -1,247              | -2,013              | 1,003             | -1,422            | -1,569            |                         |                               |                       |                      |
| ID1717          |                      | -1,448             | -1,249              | -1,413              | -4,821            | -2,424            | -1,771            |                         |                               |                       |                      |
| ID1298          |                      | -1,029             | -1,251              | -1,107              | -11,917           | -1,433            | -1,322            |                         |                               |                       |                      |
| ID1933424       |                      | 1,111              | -1,253              | 1,082               | -1,130            | -1,330            | 2,708             |                         |                               |                       |                      |
| ID344430        |                      | -1,191             | -1,255              | 1,060               | 1,518             | -1,294            | -1,061            |                         |                               |                       |                      |
| ID339           |                      | -1,073             | -1,256              | -1,370              | -2,077            | -1,687            | -1,527            |                         |                               |                       |                      |
| ID3763685       |                      | -1,800             | -1,256              | -1,444              | -1,402            | -1,305            | 1,138             |                         |                               |                       |                      |
| ID1665          |                      | -1,358             | -1,260              | -1,840              | 1,035             | -1,312            | -1,132            |                         |                               |                       |                      |
| ID142473        |                      | -1,431             | -1,263              | -1,200              | -2,346            | -1,416            | -2,106            |                         |                               |                       |                      |
| ID948           |                      | 1,112              | -1,264              | -1,148              | -1,785            | -1,429            | -1,366            |                         |                               |                       |                      |
| ID75950         |                      | -1,066             | -1,267              | -1,033              | -2,086            | -1,494            | -1,542            |                         |                               |                       |                      |
| ID371           |                      | -1,132             | -1,278              | -1,271              | -2,072            | -1,295            | -1,706            |                         |                               |                       |                      |
| ID470           |                      | -1,223             | -1,283              | -1,093              | -1,169            | -1,196            | -1,640            |                         |                               |                       |                      |
| ID15367         |                      | -1,130             | -1,287              | -1,365              | -4,818            | -4,789            | -7,873            |                         |                               |                       |                      |
| ID141431        |                      | 1,272              | -1,300              | 21,895              | -1,954            | -2,946            | -2,389            |                         |                               |                       |                      |
| ID538           |                      | -1,074             | -1,306              | -1,109              | -2,877            | -1,698            | -1,623            |                         |                               |                       |                      |
| ID1379          |                      | -1,384             | -1,307              | -1,314              | -2,103            | -1,981            | -2,471            |                         |                               |                       |                      |
| ID1866181       |                      | -16,813            | -1,311              | -1,016              | -2,638            | -24,008           | -13791,834        |                         |                               |                       |                      |
| ID3761658       |                      | -4,447             | -1,311              | -1,559              | -2,573            | -2,211            | -1,723            |                         |                               |                       |                      |
| ID373664        |                      | -1,245             | -1,312              | -1,273              | -2,142            | -1,819            | -1,597            |                         |                               |                       |                      |
| ID523           |                      | -1,349             | -1,312              | -1,416              | -1,513            | -1,571            | -1,916            |                         |                               |                       |                      |
| ID137923        |                      | -1,165             | -1,320              | -1,490              | 1,016             | -1,181            | -1,621            |                         |                               |                       |                      |
| ID66151         |                      | 1,138              | -1,327              | -1,476              | 1,643             | 1,377             | 2,807             |                         |                               |                       |                      |
| ID1219          |                      | -1,494             | -1,331              | -1,502              | -1,499            | -1,333            | -1,182            |                         |                               |                       |                      |
| ID1299          |                      | 2,257              | -1,335              | -5,526              | -23,781           | -3,945            | -2,808            |                         |                               |                       |                      |
| ID639           |                      | -1,228             | -1,336              | -1,020              | -1,405            | -1,576            | -1,217            |                         |                               |                       |                      |
| ID449534        |                      | -1,237             | -1,341              | -1,254              | -1,455            | -1,591            | -1,408            |                         |                               |                       |                      |
| ID1652          |                      | -1,183             | -1,351              | -1,181              | -9,002            | -1,208            | 1,003             |                         |                               |                       |                      |
| ID1655          |                      | -1,425             | -1,352              | -1,121              | 1,966             | -1,129            | 1,032             |                         |                               |                       |                      |
| ID1538          |                      | 1,140              | -1,354              | 1,121               | -1,220            | -1,362            | -1,576            |                         |                               |                       |                      |
| ID1648          |                      | -1,305             | -1,354              | -1,053              | -1,830            | -1,526            | -3,609            |                         |                               |                       |                      |
| ID2329037       |                      | -1,183             | -1,356              | -1,099              | 1,002             | -1,362            | -1,583            |                         |                               |                       |                      |
| ID294218        |                      | -1,323             | -1,361              | -1,133              | -1,460            | -1,663            | -1,222            |                         |                               |                       |                      |
| ID1100          |                      | 1,428              | -1,362              | -1,663              | -3,618            | -1,568            | -1,712            |                         |                               |                       |                      |
| ID1398          |                      | -1,314             | -1,380              | -1,472              | 1,628             | -1,007            | -1,637            |                         |                               |                       |                      |
| ID3395583       |                      | -1,636             | -1,382              | -1,574              | 1,113             | -1,664            | -1,131            |                         |                               |                       |                      |
| ID315205        |                      | -1,145             | -1,387              | -1,274              | -1,558            | -1,634            | -1,402            |                         |                               |                       |                      |
| ID2292906       |                      | -1,414             | -1,392              | -1,369              | -1,426            | -2,073            | -1,497            |                         |                               |                       |                      |
| ID1785527       |                      | -1,781             | -1,393              | -1,515              | -270,070          | -1,533            | -13,691           |                         |                               |                       |                      |
| ID1820          |                      | -1,265             | -1,394              | -1,177              | -1,636            | -1,041            | 1,873             |                         |                               |                       |                      |
| ID2021577       |                      | -1,289             | -1,398              | -1,168              | -1,133            | -1,514            | -1,612            |                         |                               |                       |                      |
| ID221306        |                      | -1,228             | -1,401              | -1,651              | 1,131             | -1,478            | -1,324            |                         |                               |                       |                      |
| ID145564        |                      | -1,316             | -1,402              | -1,817              | -1,468            | -1,295            | -1,296            |                         |                               |                       |                      |
| ID1750          |                      | -1,273             | -1,403              | -1,469              | -1,117            | -1,764            | -1,736            |                         |                               |                       |                      |
| ID296837        |                      | -1,382             | -1,405              | -1,536              | -1,030            | -1,385            | -1,340            |                         |                               |                       |                      |

Table S-2

| ID <sup>1</sup> | Protein <sup>2</sup> | 0 min <sup>3</sup> | 30 min <sup>3</sup> | 60 min <sup>3</sup> | 24 h <sup>3</sup> | 48 h <sup>3</sup> | 72 h <sup>3</sup> | IPA symbol <sup>4</sup> | Entrez gene name <sup>5</sup> | location <sup>6</sup> | type(s) <sup>7</sup> |
|-----------------|----------------------|--------------------|---------------------|---------------------|-------------------|-------------------|-------------------|-------------------------|-------------------------------|-----------------------|----------------------|
| ID1175          |                      | -1,299             | -1,405              | -1,448              | -1,834            | -1,324            | -1,319            |                         |                               |                       |                      |
| ID16755         |                      | -1,454             | -1,413              | -1,142              | 1,008             | -1,829            | -2,302            |                         |                               |                       |                      |
| ID457100        |                      | -1,041             | -1,416              | -1,319              | -1,537            | -1,548            | -1,602            |                         |                               |                       |                      |
| ID1009          |                      | -1,122             | -1,418              | -1,188              | -1,349            | -1,416            | -1,617            |                         |                               |                       |                      |
| ID2522          |                      | -1,177             | -1,418              | -1,155              | 2,080             | 1,031             | 1,024             |                         |                               |                       |                      |
| ID855           |                      | -1,247             | -1,420              | -1,197              | -7,167            | -1,237            | -1,068            |                         |                               |                       |                      |
| ID3184881       |                      | -1,425             | -1,427              | -1,370              | 1,051             | 2,060             | -1,021            |                         |                               |                       |                      |
| ID1301          |                      | -1,272             | -1,435              | -1,341              | -8,119            | -24,618           | -123,019          |                         |                               |                       |                      |
| ID2019749       |                      | -3,211             | -1,440              | -3,139              | -1,112            | -1,183            | -1,285            |                         |                               |                       |                      |
| ID1228          |                      | 1,235              | -1,444              | -1,514              | 1,126             | 1,149             | 1,683             |                         |                               |                       |                      |
| ID2439918       |                      | -1,174             | -1,453              | -1,541              | 1,353             | -1,592            | -1,221            |                         |                               |                       |                      |
| ID2039001       |                      | 1,040              | -1,458              | -1,035              | -1,580            | 1,013             | -1,492            |                         |                               |                       |                      |
| ID1931678       |                      | -1,270             | -1,459              | -1,385              | 1,012             | -1,260            | 2,038             |                         |                               |                       |                      |
| ID17878         |                      | -1,446             | -1,461              | -1,375              | -2,087            | -1,653            | -1,158            |                         |                               |                       |                      |
| ID1506          |                      | -1,686             | -1,463              | -1,328              | -1,541            | -1,226            | -1,029            |                         |                               |                       |                      |
| ID1864524       |                      | -1,314             | -1,464              | -2,571              | 1,564             | -1,218            | -2,479            |                         |                               |                       |                      |
| ID315424        |                      | -1,165             | -1,468              | -1,263              | -1,664            | -1,487            | -1,321            |                         |                               |                       |                      |
| ID2087348       |                      | -1,212             | -1,473              | -1,378              | -4,338            | -3,015            | -1,704            |                         |                               |                       |                      |
| ID1340          |                      | 1,415              | -1,479              | -1,400              | 2,004             | -1,445            | 1,092             |                         |                               |                       |                      |
| ID325           |                      | -1,018             | -1,481              | 1,021               | 1,533             | -1,092            | -1,061            |                         |                               |                       |                      |
| ID1437          |                      | -1,356             | -1,481              | -1,206              | -1,587            | -1,412            | -1,970            |                         |                               |                       |                      |
| ID594301        |                      | -1,050             | -1,483              | -1,103              | 1,789             | 1,004             | 1,094             |                         |                               |                       |                      |
| ID129210        |                      | -1,527             | -1,486              | -1,413              | 1,012             | -1,243            | -1,459            |                         |                               |                       |                      |
| ID1692          |                      | -1,342             | -1,490              | -1,250              | -24,094           | -1,357            | -1,213            |                         |                               |                       |                      |
| ID1759          |                      | -1,234             | -1,495              | -1,490              | -1,253            | -1,199            | -1,237            |                         |                               |                       |                      |
| ID1730          |                      | -1,271             | -1,504              | -1,063              | -1,351            | -1,341            | -1,649            |                         |                               |                       |                      |
| ID1383          |                      | -1,397             | -1,506              | -1,251              | -1,658            | -1,369            | -1,350            |                         |                               |                       |                      |
| ID2023391       |                      | -1,284             | -1,512              | -1,174              | -1,469            | -1,438            | -1,664            |                         |                               |                       |                      |
| ID80360         |                      | -1,342             | -1,514              | -1,511              | -2,180            | -1,846            | -1,620            |                         |                               |                       |                      |
| ID1792282       |                      | -1,809             | -1,516              | -1,593              | -3,862            | -2,824            | -3,601            |                         |                               |                       |                      |
| ID411894        |                      | 1,066              | -1,521              | -1,355              | -1,690            | -1,153            | -1,273            |                         |                               |                       |                      |
| ID567           |                      | -1,590             | -1,528              | -1,209              | -1,108            | -1,180            | -1,167            |                         |                               |                       |                      |
| ID1575          |                      | -1,353             | -1,532              | -1,411              | 1,066             | 1,047             | -1,019            |                         |                               |                       |                      |
| ID31044         |                      | -1,000             | -1,538              | -1,166              | -1,494            | 1,042             | -1,146            |                         |                               |                       |                      |
| ID2302886       |                      | -1,461             | -1,540              | -1,343              | -1,710            | -10,130           | 1,857             |                         |                               |                       |                      |
| ID341           |                      | -1,322             | -1,545              | -1,497              | -1,132            | -1,486            | -1,915            |                         |                               |                       |                      |
| ID2040831       |                      | -1,050             | -1,545              | -1,086              | -2,239            | -1,176            | -1,798            |                         |                               |                       |                      |
| ID1303          |                      | -1,807             | -1,556              | -1,756              | -1,592            | -1,697            | -1,214            |                         |                               |                       |                      |
| ID3711681       |                      | -1,299             | -1,557              | -1,481              | -2,033            | -1,772            | 1,023             |                         |                               |                       |                      |
| ID1457          |                      | -1,528             | -1,561              | -1,550              | -1,467            | -1,400            | -1,432            |                         |                               |                       |                      |
| ID2042668       |                      | -1,156             | -1,561              | -1,098              | -3,653            | -1,595            | -2,273            |                         |                               |                       |                      |
| ID149908        |                      | -1,364             | -1,562              | -1,227              | -1,478            | -1,268            | -1,324            |                         |                               |                       |                      |
| ID1544          |                      | -1,372             | -1,566              | -1,203              | -1,427            | -1,484            | -1,538            |                         |                               |                       |                      |
| ID186642        |                      | -1,143             | -1,575              | -1,144              | 1,131             | -1,241            | -1,832            |                         |                               |                       |                      |
| ID1537          |                      | -1,431             | -1,580              | 3,206               | -92,685           | -1,711            | -58,747           |                         |                               |                       |                      |
| ID210320        |                      | -1,388             | -1,582              | -1,621              | -1,303            | -1,498            | -1,473            |                         |                               |                       |                      |
| ID216132        |                      | -1,828             | -1,583              | -1,884              | -1,421            | -1,028            | -1,180            |                         |                               |                       |                      |
| ID1574          |                      | -1,143             | -1,587              | -6,755              | -1,846            | -1,184            | 1,739             |                         |                               |                       |                      |
| ID1736          |                      | -1,209             | -1,592              | -1,341              | -1,343            | -1,061            | 1,068             |                         |                               |                       |                      |
| ID1602          |                      | 1,043              | -1,593              | -1,274              | -1,939            | 1,065             | -1,279            |                         |                               |                       |                      |
| ID1705          |                      | -1,288             | -1,594              | -1,295              | -1,061            | 1,281             | -1,108            |                         |                               |                       |                      |
| ID1593          |                      | -1,271             | -1,594              | -1,161              | -1,140            | -1,115            | -1,669            |                         |                               |                       |                      |
| ID2974603       |                      | -1,334             | -1,595              | -1,302              | -1,601            | -1,152            | -1,494            |                         |                               |                       |                      |
| ID1788919       |                      | -1,650             | -1,597              | -1,453              | -6,677            | -2,710            | -3,912            |                         |                               |                       |                      |
| ID3068832       |                      | -1,221             | -1,598              | -1,471              | -1,387            | -1,178            | -1,185            |                         |                               |                       |                      |
| ID440482        |                      | -1,266             | -1,601              | -1,395              | -1,719            | 2,054             | 1,762             |                         |                               |                       |                      |
| ID113114        |                      | -2,085             | -1,602              | -1,432              | -1,398            | -1,568            | -1,576            |                         |                               |                       |                      |
| ID566208        |                      | -1,248             | -1,603              | -1,674              | -1,884            | -1,403            | -1,493            |                         |                               |                       |                      |
| ID1911469       |                      | -1,595             | -1,607              | -1,229              | 1,172             | 1,182             | 1,622             |                         |                               |                       |                      |

Table S-2

| ID <sup>1</sup> | Protein <sup>2</sup> | 0 min <sup>3</sup> | 30 min <sup>3</sup> | 60 min <sup>3</sup> | 24 h <sup>3</sup> | 48 h <sup>3</sup> | 72 h <sup>3</sup> | IPA symbol <sup>4</sup> | Entrez gene name <sup>5</sup> | location <sup>6</sup> | type(s) <sup>7</sup> |
|-----------------|----------------------|--------------------|---------------------|---------------------|-------------------|-------------------|-------------------|-------------------------|-------------------------------|-----------------------|----------------------|
| ID574393        |                      | -1,659             | -1,610              | -1,527              | -1,844            | -1,727            | -1,938            |                         |                               |                       |                      |
| ID349           |                      | -1,077             | -1,614              | -1,501              | -3,297            | -1,758            | -2,235            |                         |                               |                       |                      |
| ID65305         |                      | -1,495             | -1,616              | -1,333              | -1,839            | -1,270            | -1,225            |                         |                               |                       |                      |
| ID1182          |                      | -1,815             | -1,619              | -2,307              | -2,248            | -2,505            | -2,095            |                         |                               |                       |                      |
| ID154183        |                      | -1,795             | -1,622              | -1,567              | -1,225            | -1,136            | -1,291            |                         |                               |                       |                      |
| ID3763682       |                      | -1,069             | -1,623              | -1,328              | 1,291             | 1,308             | -1,274            |                         |                               |                       |                      |
| ID3597623       |                      | -1,726             | -1,624              | -1,552              | -1,182            | -1,408            | -1,040            |                         |                               |                       |                      |
| ID119751        |                      | -1,681             | -1,630              | -1,676              | -1,797            | -1,669            | -1,873            |                         |                               |                       |                      |
| ID2308652       |                      | -1,295             | -1,642              | -1,855              | -4,251            | -2,851            | -2,568            |                         |                               |                       |                      |
| ID380           |                      | -1,425             | -1,642              | -1,594              | -2,044            | -1,554            | -1,630            |                         |                               |                       |                      |
| ID1960958       |                      | -1,625             | -1,643              | -1,213              | 1,621             | -1,079            | -1,428            |                         |                               |                       |                      |
| ID2055531       |                      | -1,262             | -1,648              | -1,369              | -1,024            | -1,295            | -1,576            |                         |                               |                       |                      |
| ID320497        |                      | -1,630             | -1,648              | -1,766              | -1,807            | -1,864            | -2,842            |                         |                               |                       |                      |
| ID83942         |                      | -1,589             | -1,653              | -1,406              | -1,632            | -1,547            | -1,487            |                         |                               |                       |                      |
| ID1709          |                      | -1,506             | -1,656              | -1,257              | -1,532            | -1,598            | -1,590            |                         |                               |                       |                      |
| ID6678          |                      | -1,203             | -1,659              | -1,040              | 1,565             | -1,361            | -1,325            |                         |                               |                       |                      |
| ID1998321       |                      | 1,063              | -1,659              | 1,082               | -3,219            | -1,953            | -3,281            |                         |                               |                       |                      |
| ID125371        |                      | 1,295              | -1,660              | -1,216              | -2,110            | -1,808            | -1,840            |                         |                               |                       |                      |
| ID1339          |                      | -1,562             | -1,661              | -1,589              | -1,926            | -1,541            | -1,650            |                         |                               |                       |                      |
| ID1571          |                      | -1,408             | -1,668              | -1,303              | -1,645            | -1,482            | -1,480            |                         |                               |                       |                      |
| ID33115         |                      | -1,112             | -1,676              | -1,166              | -159,784          | -1,678            | -1,696            |                         |                               |                       |                      |
| ID23159         |                      | -1,195             | -1,676              | -1,540              | -1,105            | -1,556            | -1,328            |                         |                               |                       |                      |
| ID2008587       |                      | -1,509             | -1,677              | -1,022              | -1,593            | -3,275            | -1,916            |                         |                               |                       |                      |
| ID1151          |                      | -1,227             | -1,677              | -1,180              | -1,073            | -1,152            | -1,420            |                         |                               |                       |                      |
| ID2788379       |                      | -1,440             | -1,685              | -1,530              | -1,596            | -1,632            | -1,667            |                         |                               |                       |                      |
| ID1359          |                      | -1,578             | -1,692              | -1,786              | -1,211            | -1,257            | -1,243            |                         |                               |                       |                      |
| ID1545          |                      | -1,451             | -1,694              | -1,245              | -1,171            | -1,482            | -1,663            |                         |                               |                       |                      |
| ID1129          |                      | -1,510             | -1,694              | -1,395              | -1,609            | -1,332            | -1,529            |                         |                               |                       |                      |
| ID2742902       |                      | -1,198             | -1,695              | -1,327              | 1,392             | 1,128             | -1,056            |                         |                               |                       |                      |
| ID131133        |                      | -1,485             | -1,699              | -1,674              | -1,502            | -1,599            | -1,803            |                         |                               |                       |                      |
| ID2723          |                      | -1,741             | -1,701              | -1,493              | -1,274            | -1,307            | -1,160            |                         |                               |                       |                      |
| ID524           |                      | -2,125             | -1,702              | -2,399              | -2,770            | -2,562            | -2,530            |                         |                               |                       |                      |
| ID3352574       |                      | -1,354             | -1,703              | -1,559              | -1,650            | -1,557            | -1,471            |                         |                               |                       |                      |
| ID1190          |                      | 1,191              | -1,703              | -1,617              | -1,317            | -1,033            | 1,105             |                         |                               |                       |                      |
| ID1081          |                      | -1,802             | -1,705              | -2,192              | -2,127            | -1,596            | -1,823            |                         |                               |                       |                      |
| ID1394          |                      | -1,821             | -1,705              | -1,472              | 1,580             | -1,072            | -1,158            |                         |                               |                       |                      |
| ID1125          |                      | -1,459             | -1,715              | -2,096              | -1,904            | -1,493            | -1,386            |                         |                               |                       |                      |
| ID350           |                      | -1,174             | -1,715              | -1,463              | -2,481            | -1,800            | -1,767            |                         |                               |                       |                      |
| ID1283          |                      | -1,534             | -1,728              | -1,385              | -1,293            | -1,281            | -1,335            |                         |                               |                       |                      |
| ID114983        |                      | -2,151             | -1,728              | -1,272              | -2,490            | -1,168            | -1,727            |                         |                               |                       |                      |
| ID2051821       |                      | -1,545             | -1,734              | -1,515              | 1,025             | -1,617            | -1,635            |                         |                               |                       |                      |
| ID2057395       |                      | -1,501             | -1,737              | -1,557              | -1,519            | -1,750            | -2,424            |                         |                               |                       |                      |
| ID1608          |                      | 1,341              | -1,737              | -1,537              | -4,644            | -1,374            | -1,575            |                         |                               |                       |                      |
| ID2060826       |                      | -1,424             | -1,748              | -1,492              | -1,434            | -1,664            | -2,756            |                         |                               |                       |                      |
| ID529           |                      | -1,432             | -1,750              | -1,381              | -2,385            | -1,747            | -1,584            |                         |                               |                       |                      |
| ID453           |                      | -1,776             | -1,752              | -2,422              | -17,256           | -1,721            | -1,654            |                         |                               |                       |                      |
| ID2294          |                      | -1,239             | -1,754              | -1,132              | -1,524            | -1,266            | -1,082            |                         |                               |                       |                      |
| ID83022         |                      | -1,572             | -1,756              | -1,609              | -1,279            | -1,432            | -1,565            |                         |                               |                       |                      |
| ID3759858       |                      | -1,254             | -1,759              | -1,002              | 1,177             | -6,433            | -2,869            |                         |                               |                       |                      |
| ID1772          |                      | -1,448             | -1,759              | -1,470              | -1,071            | -1,149            | -1,025            |                         |                               |                       |                      |
| ID3762560       |                      | -1,403             | -1,759              | -1,612              | -1,400            | -1,797            | -1,266            |                         |                               |                       |                      |
| ID356           |                      | -1,422             | -1,766              | -1,568              | -2,459            | -2,026            | -1,837            |                         |                               |                       |                      |
| ID1676          |                      | 1,789              | -1,767              | -3,150              | 2,016             | 1,163             | -1,089            |                         |                               |                       |                      |
| ID6662          |                      | -1,335             | -1,769              | -1,138              | 1,422             | -1,591            | -1,554            |                         |                               |                       |                      |
| ID91144         |                      | -1,552             | -1,770              | -1,470              | -1,485            | -1,284            | -1,873            |                         |                               |                       |                      |
| ID1669          |                      | -1,719             | -1,777              | -1,551              | -1,111            | -1,339            | -1,063            |                         |                               |                       |                      |
| ID464690        |                      | -1,445             | -1,777              | -1,447              | -4,812            | -1,744            | -1,813            |                         |                               |                       |                      |
| ID398           |                      | -1,532             | -1,781              | -1,593              | -1,708            | -1,644            | -1,724            |                         |                               |                       |                      |
| ID167310        |                      | -1,857             | -1,786              | -1,479              | -1,646            | -1,619            | -1,358            |                         |                               |                       |                      |

Table S-2

| ID <sup>1</sup> | Protein <sup>2</sup> | 0 min <sup>3</sup> | 30 min <sup>3</sup> | 60 min <sup>3</sup> | 24 h <sup>3</sup> | 48 h <sup>3</sup> | 72 h <sup>3</sup> | IPA symbol <sup>4</sup> | Entrez gene name <sup>5</sup> | location <sup>6</sup> | type(s) <sup>7</sup> |
|-----------------|----------------------|--------------------|---------------------|---------------------|-------------------|-------------------|-------------------|-------------------------|-------------------------------|-----------------------|----------------------|
| ID283779        |                      | -1,267             | -1,787              | -1,425              | -1,430            | -1,682            | -1,929            |                         |                               |                       |                      |
| ID3130260       |                      | -1,313             | -1,790              | -1,472              | -3,324            | -2,353            | -1,803            |                         |                               |                       |                      |
| ID463195        |                      | -1,337             | -1,801              | -1,450              | -23,557           | -2,414            | -1,978            |                         |                               |                       |                      |
| ID1982157       |                      | -1,693             | -1,804              | -1,447              | -3,520            | -3,612            | -3,863            |                         |                               |                       |                      |
| ID414           |                      | -1,337             | -1,806              | -1,744              | -1,683            | -1,807            | -1,966            |                         |                               |                       |                      |
| ID57056         |                      | -1,286             | -1,806              | -1,213              | -1,439            | -1,291            | -1,133            |                         |                               |                       |                      |
| ID2275539       |                      | -1,659             | -1,806              | -1,379              | -2979,089         | -1,406            | -1,773            |                         |                               |                       |                      |
| ID1716          |                      | -1,028             | -1,810              | -1,242              | -2,178            | -1,465            | -1,086            |                         |                               |                       |                      |
| ID938           |                      | -1,411             | -1,810              | -2,712              | -4,837            | -3,815            | -1,693            |                         |                               |                       |                      |
| ID1568          |                      | -2,036             | -1,818              | -1,548              | -1,443            | -1,304            | 1,022             |                         |                               |                       |                      |
| ID483           |                      | -1,203             | -1,824              | -1,472              | -2,379            | -1,706            | -1,585            |                         |                               |                       |                      |
| ID4923          |                      | 1,043              | -1,827              | -1,257              | -2,143            | -1,696            | -1,646            |                         |                               |                       |                      |
| ID136093        |                      | -1,405             | -1,842              | -1,806              | -1,419            | -1,412            | -1,203            |                         |                               |                       |                      |
| ID1281          |                      | -1,073             | -1,842              | -2,218              | -1,107            | -1,149            | -1,614            |                         |                               |                       |                      |
| ID2113599       |                      | -1,392             | -1,850              | -2,337              | -2,310            | -2,474            | -2,492            |                         |                               |                       |                      |
| ID362785        |                      | -1,377             | -1,854              | -1,711              | -1,639            | -1,279            | -1,333            |                         |                               |                       |                      |
| ID313877        |                      | -1,652             | -1,856              | -1,695              | -3,315            | -1,662            | -1,261            |                         |                               |                       |                      |
| ID2140633       |                      | -1,729             | -1,856              | -1,363              | -11,402           | -1,904            | -20,604           |                         |                               |                       |                      |
| ID1556          |                      | 1,024              | -1,859              | -3,441              | -2,791            | -1,338            | -1,949            |                         |                               |                       |                      |
| ID311244        |                      | -1,561             | -1,861              | -1,813              | -2,049            | -1,089            | -1,623            |                         |                               |                       |                      |
| ID1136          |                      | -2,112             | -1,866              | -1,949              | -1,266            | -1,214            | -1,221            |                         |                               |                       |                      |
| ID2290995       |                      | -2,082             | -1,869              | -1,734              | -1,672            | -14,586           | -32,510           |                         |                               |                       |                      |
| ID2083630       |                      | -1,313             | -1,871              | -1,731              | -5,493            | -2,157            | -2,944            |                         |                               |                       |                      |
| ID1787194       |                      | -1,543             | -1,873              | -1,454              | -10,943           | -3,574            | -13,988           |                         |                               |                       |                      |
| ID461679        |                      | -1,328             | -1,875              | -1,759              | -1,273            | -1,903            | -2,431            |                         |                               |                       |                      |
| ID1505          |                      | -1,915             | -1,880              | -1,571              | -1,257            | -1,436            | -1,302            |                         |                               |                       |                      |
| ID2221628       |                      | -1,713             | -1,884              | -1,686              | -4,283            | -1,758            | -2,131            |                         |                               |                       |                      |
| ID1233          |                      | -1,744             | -1,887              | -1,531              | -1,468            | -1,591            | -1,294            |                         |                               |                       |                      |
| ID3763666       |                      | -1,813             | -1,888              | -1,933              | -1,983            | -1,859            | -1,789            |                         |                               |                       |                      |
| ID476           |                      | -1,524             | -1,894              | -1,740              | -1,639            | -1,280            | -1,187            |                         |                               |                       |                      |
| ID314           |                      | -1,745             | -1,898              | -1,693              | 1,026             | -1,808            | -1,490            |                         |                               |                       |                      |
| ID5909          |                      | 1,050              | -1,911              | -1,794              | -3,173            | -1,952            | -2,288            |                         |                               |                       |                      |
| ID1007          |                      | -1,505             | -1,919              | -2,791              | -2,711            | -2,196            | -1,316            |                         |                               |                       |                      |
| ID82135         |                      | -1,548             | -1,926              | -1,484              | -1,301            | -1,290            | 1,128             |                         |                               |                       |                      |
| ID1017          |                      | -1,726             | -1,928              | -1,833              | 1,073             | -1,252            | -1,334            |                         |                               |                       |                      |
| ID519           |                      | -1,549             | -1,929              | -1,834              | -2,371            | -1,758            | -2,072            |                         |                               |                       |                      |
| ID525           |                      | -1,773             | -1,947              | -1,864              | -3,023            | -1,775            | -2,033            |                         |                               |                       |                      |
| ID3762259       |                      | -2,563             | -1,955              | -1,955              | -1,311            | -1,819            | -1,503            |                         |                               |                       |                      |
| ID440           |                      | -1,951             | -1,964              | -2,677              | -5,244            | -1,980            | -2,003            |                         |                               |                       |                      |
| ID16834         |                      | -1,995             | -1,968              | -1,701              | -1,689            | -1,468            | -1,521            |                         |                               |                       |                      |
| ID158651        |                      | -2,003             | -1,975              | -2,520              | -1,929            | -1,946            | -1,883            |                         |                               |                       |                      |
| ID328907        |                      | -1,284             | -1,975              | 1,174               | -2,374            | -1,819            | -2,143            |                         |                               |                       |                      |
| ID182136        |                      | 1,313              | -2,004              | -2,647              | -1,835            | -2,021            | -1,216            |                         |                               |                       |                      |
| ID386066        |                      | -1,134             | -2,004              | -1,601              | -1,090            | -1,353            | -1,487            |                         |                               |                       |                      |
| ID2081733       |                      | -1,203             | -2,006              | -1,598              | -7,546            | -2,117            | -3,471            |                         |                               |                       |                      |
| ID586           |                      | -2,459             | -2,030              | -1,887              | -1,253            | 1,563             | -6,155            |                         |                               |                       |                      |
| ID57837         |                      | -2,199             | -2,034              | -1,905              | -2,256            | -1,447            | -1,127            |                         |                               |                       |                      |
| ID1582          |                      | -1,675             | -2,040              | -1,024              | 1,082             | 1,799             | 1,527             |                         |                               |                       |                      |
| ID130985        |                      | -1,623             | -2,064              | -2,001              | -1,668            | -1,572            | -1,577            |                         |                               |                       |                      |
| ID257339        |                      | -1,668             | -2,065              | -1,641              | -1,421            | -1,753            | -1,648            |                         |                               |                       |                      |
| ID1631          |                      | -1,489             | -2,068              | -1,150              | -1,719            | -1,468            | -1,157            |                         |                               |                       |                      |
| ID5884          |                      | -2,643             | -2,087              | -2,032              | -2,212            | -1,304            | 1,041             |                         |                               |                       |                      |
| ID9000          |                      | -2,999             | -2,096              | -2,818              | -2,335            | -1,093            | -1,145            |                         |                               |                       |                      |
| ID51068         |                      | -1,647             | -2,107              | -1,478              | -1,480            | -1,895            | -1,740            |                         |                               |                       |                      |
| ID1617          |                      | -2,808             | -2,107              | -1,835              | -6,842            | -3,602            | -4,069            |                         |                               |                       |                      |
| ID2005865       |                      | -1,764             | -2,109              | -1,196              | -1,458            | -1,901            | -1,110            |                         |                               |                       |                      |
| ID1563          |                      | -2,900             | -2,115              | -1,376              | -1,303            | -1,058            | -1,720            |                         |                               |                       |                      |
| ID242682        |                      | -1,229             | -2,115              | -1,795              | -5,000            | -2,100            | -2,032            |                         |                               |                       |                      |
| ID23217         |                      | -1,562             | -2,116              | -1,785              | -2,724            | -1,824            | -1,868            |                         |                               |                       |                      |

Table S-2

| ID <sup>1</sup> | Protein <sup>2</sup> | 0 min <sup>3</sup> | 30 min <sup>3</sup> | 60 min <sup>3</sup> | 24 h <sup>3</sup> | 48 h <sup>3</sup> | 72 h <sup>3</sup> | IPA symbol <sup>4</sup> | Entrez gene name <sup>5</sup> | location <sup>6</sup> | type(s) <sup>7</sup> |
|-----------------|----------------------|--------------------|---------------------|---------------------|-------------------|-------------------|-------------------|-------------------------|-------------------------------|-----------------------|----------------------|
| ID2784333       |                      | -1,551             | -2,124              | -1,402              | 1,537             | -1,438            | -1,280            |                         |                               |                       |                      |
| ID315           |                      | -2,443             | -2,128              | -8,132              | -3,338            | -2,639            | -18,503           |                         |                               |                       |                      |
| ID2044505       |                      | -1,587             | -2,142              | -1,520              | -3,743            | -2,084            | -2,293            |                         |                               |                       |                      |
| ID240305        |                      | -1,392             | -2,180              | -1,879              | -5,977            | -2,392            | -2,330            |                         |                               |                       |                      |
| ID3231778       |                      | -1,670             | -2,180              | -1,864              | -1,853            | -1,500            | -1,416            |                         |                               |                       |                      |
| ID528           |                      | -1,583             | -2,199              | -1,988              | -2,957            | -2,604            | -1,975            |                         |                               |                       |                      |
| ID165075        |                      | -1,232             | -2,204              | -1,457              | -1,433            | -1,546            | -1,043            |                         |                               |                       |                      |
| ID1521          |                      | -3,804             | -2,207              | -2,283              | -1,357            | -1,317            | -1,240            |                         |                               |                       |                      |
| ID576           |                      | -2,104             | -2,210              | -1,682              | -1,571            | -1,568            | -1,249            |                         |                               |                       |                      |
| ID590           |                      | -1,464             | -2,217              | -1,307              | -17,269           | -2,144            | -2,154            |                         |                               |                       |                      |
| ID306           |                      | -1,059             | -2,221              | -4,553              | -3,528            | -3,961            | -1,568            |                         |                               |                       |                      |
| ID484           |                      | -1,684             | -2,240              | -1,919              | -1,852            | -1,470            | -1,465            |                         |                               |                       |                      |
| ID2028269       |                      | -3,495             | -2,245              | -1,524              | -4,987            | -2,367            | -2,797            |                         |                               |                       |                      |
| ID1535          |                      | -2,146             | -2,247              | -1,461              | -2,906            | -1,694            | -1,845            |                         |                               |                       |                      |
| ID351           |                      | -1,504             | -2,260              | -1,834              | -7,938            | -2,935            | -2,493            |                         |                               |                       |                      |
| ID452           |                      | -2,305             | -2,261              | -2,355              | -21,748           | -1,726            | -1,649            |                         |                               |                       |                      |
| ID218682        |                      | -1,617             | -2,267              | -1,430              | -2,065            | -1,649            | -1,892            |                         |                               |                       |                      |
| ID412768        |                      | -1,168             | -2,276              | -1,989              | -2,126            | -1,487            | -1,954            |                         |                               |                       |                      |
| ID2190755       |                      | -2,820             | -2,300              | -2,146              | -3,805            | -7,151            | -3,371            |                         |                               |                       |                      |
| ID2072345       |                      | -1,271             | -2,302              | -2,123              | -28,864           | -2,311            | -4,307            |                         |                               |                       |                      |
| ID353686        |                      | -2,053             | -2,337              | -1,574              | -2,678            | -1,322            | -1,898            |                         |                               |                       |                      |
| ID309           |                      | -1,396             | -2,339              | -1,698              | -3,414            | -2,319            | -2,084            |                         |                               |                       |                      |
| ID4476          |                      | -2,090             | -2,341              | -1,932              | -1,735            | -1,675            | -1,574            |                         |                               |                       |                      |
| ID2924537       |                      | -1,854             | -2,347              | -2,359              | -1,235            | -1,210            | 1,438             |                         |                               |                       |                      |
| ID393893        |                      | -1,484             | -2,379              | -2,312              | -5,220            | -3,557            | -3,490            |                         |                               |                       |                      |
| ID495           |                      | -1,657             | -2,413              | -2,102              | -1,688            | -1,236            | -1,266            |                         |                               |                       |                      |
| ID25129         |                      | -1,614             | -2,420              | -1,259              | -1,962            | -1,588            | 1,173             |                         |                               |                       |                      |
| ID4489          |                      | -2,051             | -2,425              | -2,001              | -1,413            | -1,508            | -1,494            |                         |                               |                       |                      |
| ID1057          |                      | -2,593             | -2,429              | -2,199              | -1,437            | 1,396             | -2,146            |                         |                               |                       |                      |
| ID2830369       |                      | -1,756             | -2,471              | -1,766              | -1,460            | -1,416            | -1,048            |                         |                               |                       |                      |
| ID2070460       |                      | -1,258             | -2,514              | -2,154              | -875,916          | -6,682            | -12,294           |                         |                               |                       |                      |
| ID2379          |                      | -2,267             | -2,517              | -2,628              | -5,882            | 1,240             | 2,704             |                         |                               |                       |                      |
| ID1533          |                      | -1,969             | -2,520              | -1,785              | -1,800            | -2,261            | -1,846            |                         |                               |                       |                      |
| ID2300514       |                      | -1,876             | -2,523              | -1,515              | 4,173             | 4,363             | 6,119             |                         |                               |                       |                      |
| ID240147        |                      | -1,477             | -2,538              | -2,155              | -6,402            | -2,733            | -3,003            |                         |                               |                       |                      |
| ID2064822       |                      | -2,085             | -2,543              | -2,266              | -2,643            | -3,123            | -3,072            |                         |                               |                       |                      |
| ID3760248       |                      | -2,688             | -2,561              | -2,381              | -1,948            | -1,778            | -1,521            |                         |                               |                       |                      |
| ID1594          |                      | -2,100             | -2,565              | -1,607              | -2,530            | -2,119            | -2,020            |                         |                               |                       |                      |
| ID2068313       |                      | -1,344             | -2,577              | -1,831              | -4,515            | -2,532            | -2,939            |                         |                               |                       |                      |
| ID5273          |                      | -1,614             | -2,577              | -2,018              | -2,136            | -1,236            | -1,676            |                         |                               |                       |                      |
| ID522           |                      | -2,421             | -2,589              | -2,163              | -52,771           | -4,780            | -10,178           |                         |                               |                       |                      |
| ID1540          |                      | 1,888              | -2,634              | -3,626              | -1,803            | 1,935             | 1,190             |                         |                               |                       |                      |
| ID1481          |                      | -1,555             | -2,635              | -1,271              | -2,634            | -1,027            | -1,277            |                         |                               |                       |                      |
| ID2085530       |                      | -1,218             | -2,659              | -1,778              | -4,285            | -1,802            | -3,379            |                         |                               |                       |                      |
| ID2838327       |                      | -2,428             | -2,678              | -2,445              | -1,701            | -1,541            | -1,089            |                         |                               |                       |                      |
| ID2944561       |                      | -2,463             | -2,691              | -1,515              | -1,229            | 1,162             | 1,176             |                         |                               |                       |                      |
| ID2555205       |                      | -1,470             | -2,734              | -2,628              | -2,342            | -3,840            | -4,102            |                         |                               |                       |                      |
| ID1124          |                      | -1,480             | -2,738              | -1,782              | -1,619            | -1,222            | -1,127            |                         |                               |                       |                      |
| ID1045          |                      | -3,818             | -2,743              | -2,272              | -1,124            | 1,005             | -4,829            |                         |                               |                       |                      |
| ID110384        |                      | -1,996             | -2,797              | -2,183              | -2,626            | -1,591            | -1,646            |                         |                               |                       |                      |
| ID2288948       |                      | 2,197              | -2,812              | -1,446              | n.d.              | -2,104            | -100,425          |                         |                               |                       |                      |
| ID2024619       |                      | -1,595             | -2,831              | -1,170              | -6,251            | -85,030           | -5,571            |                         |                               |                       |                      |
| ID114043        |                      | -2,598             | -2,846              | -1,842              | -3,003            | -1,555            | -1,848            |                         |                               |                       |                      |
| ID2062951       |                      | -1,897             | -2,886              | -1,993              | -7,545            | -4,233            | -5,816            |                         |                               |                       |                      |
| ID388           |                      | -1,509             | -2,891              | -3,483              | -8,458            | -4,612            | -4,615            |                         |                               |                       |                      |
| ID109442        |                      | -1,424             | -2,893              | -1,346              | -1,426            | -1,259            | -1,556            |                         |                               |                       |                      |
| ID2204207       |                      | -1,862             | -2,940              | -2,460              | -5,565            | 2,511             | -1,725            |                         |                               |                       |                      |
| ID429069        |                      | -3,646             | -2,940              | -5,175              | 1,091             | -1,103            | -1,224            |                         |                               |                       |                      |
| ID1700          |                      | -2,487             | -2,952              | -1,378              | 2,904             | 1,661             | 1,804             |                         |                               |                       |                      |

Table S-2

| ID <sup>1</sup> | Protein <sup>2</sup> | 0 min <sup>3</sup> | 30 min <sup>3</sup> | 60 min <sup>3</sup> | 24 h <sup>3</sup> | 48 h <sup>3</sup> | 72 h <sup>3</sup> | IPA symbol <sup>4</sup> | Entrez gene name <sup>5</sup> | location <sup>6</sup> | type(s) <sup>7</sup> |
|-----------------|----------------------|--------------------|---------------------|---------------------|-------------------|-------------------|-------------------|-------------------------|-------------------------------|-----------------------|----------------------|
| ID1621          |                      | -2,492             | -2,973              | -1,898              | -1,635            | -2,349            | -1,473            |                         |                               |                       |                      |
| ID2549343       |                      | -1,605             | -2,978              | -2,533              | -2,208            | -1,619            | -1,576            |                         |                               |                       |                      |
| ID1048          |                      | -1,604             | -3,013              | 1,699               | -6,054            | 1,670             | -1,968            |                         |                               |                       |                      |
| ID1101          |                      | -2,801             | -3,074              | -2,582              | -2,387            | -1,848            | -1,665            |                         |                               |                       |                      |
| ID2926520       |                      | -1,537             | -3,199              | -4,382              | -1,224            | 1,232             | 2,963             |                         |                               |                       |                      |
| ID233300        |                      | -1,061             | -3,246              | -1,293              | -1,180            | -1,244            | -1,094            |                         |                               |                       |                      |
| ID305           |                      | -1,528             | -3,259              | -7186,377           | -3,622            | -6,298            | -1,438            |                         |                               |                       |                      |
| ID37898         |                      | -3,128             | -3,283              | -3,531              | -7,742            | -2,159            | -2,079            |                         |                               |                       |                      |
| ID1763758       |                      | -2,021             | -3,319              | -2,551              | -5,920            | -19,024           | -6,999            |                         |                               |                       |                      |
| ID613           |                      | -5,362             | -3,321              | -2,150              | -5,608            | -9,066            | -3,292            |                         |                               |                       |                      |
| ID2194613       |                      | -1,698             | -3,347              | -1,993              | -6,050            | -7,186            | -4,964            |                         |                               |                       |                      |
| ID1025          |                      | -2,057             | -3,382              | -2,043              | -1,505            | -1,544            | 1,017             |                         |                               |                       |                      |
| ID168476        |                      | -1,641             | -3,387              | -2,305              | -2,132            | -2,345            | -1,385            |                         |                               |                       |                      |
| ID642           |                      | -2,524             | -3,393              | -2,119              | -2,147            | -2,792            | -3,488            |                         |                               |                       |                      |
| ID985           |                      | -1,785             | -3,480              | -2,640              | -2,738            | -2,043            | -1,639            |                         |                               |                       |                      |
| ID2030105       |                      | -3,911             | -3,500              | -2,427              | -2,333            | -3,949            | -1,976            |                         |                               |                       |                      |
| ID262545        |                      | -2,159             | -3,507              | -2,599              | -1,637            | -2,125            | -1,529            |                         |                               |                       |                      |
| ID2105992       |                      | -1,854             | -3,621              | -2,493              | -6,934            | -4,514            | -4,272            |                         |                               |                       |                      |
| ID1550          |                      | -1,560             | -3,688              | -1,648              | -2,265            | -1,262            | -1,456            |                         |                               |                       |                      |
| ID389942        |                      | -1,525             | -3,742              | -1,529              | -1,267            | -1,277            | -1,179            |                         |                               |                       |                      |
| ID3763337       |                      | -1,458             | -3,819              | -1,969              | -8,015            | -26,638           | -13,636           |                         |                               |                       |                      |
| ID352           |                      | -1,981             | -3,835              | -2,541              | -19,065           | -3,178            | -2,723            |                         |                               |                       |                      |
| ID1000          |                      | -2,604             | -3,877              | -1,855              | -2,483            | -2,393            | -1,226            |                         |                               |                       |                      |
| ID2031934       |                      | -3,586             | -3,905              | -2,457              | -1,803            | -2,861            | -2,652            |                         |                               |                       |                      |
| ID89291         |                      | 1,069              | -3,990              | -1,360              | -2,132            | -1,547            | -2,397            |                         |                               |                       |                      |
| ID1518          |                      | -2,136             | -4,028              | -3,754              | -1,834            | 1,012             | 1,519             |                         |                               |                       |                      |
| ID1006          |                      | -2,233             | -4,073              | -14,746             | -4,986            | -2,550            | -1,514            |                         |                               |                       |                      |
| ID1557          |                      | -1,127             | -4,138              | -1,514              | -2,268            | -3,799            | -1,920            |                         |                               |                       |                      |
| ID36784         |                      | -2,460             | -4,211              | -6,942              | -85,657           | -2,168            | -1,931            |                         |                               |                       |                      |
| ID1158          |                      | -2,795             | -4,238              | -3,339              | -1,732            | -1,349            | -1,064            |                         |                               |                       |                      |
| ID1130          |                      | -3,021             | -4,277              | -16,098             | -5,981            | -3,627            | 1,282             |                         |                               |                       |                      |
| ID1295          |                      | -1,425             | -4,296              | -1,034              | -2,492            | -9,752            | -13,720           |                         |                               |                       |                      |
| ID1105          |                      | -3,327             | -4,303              | -2,434              | -2,391            | -1,630            | -1,616            |                         |                               |                       |                      |
| ID1534          |                      | -1,868             | -4,375              | -3,089              | -1,883            | -2,688            | -2,081            |                         |                               |                       |                      |
| ID2737054       |                      | -1,575             | -4,590              | -3,593              | -36,586           | -1,448            | -7,756            |                         |                               |                       |                      |
| ID245554        |                      | -2,849             | -4,775              | -1,988              | -3,872            | 1,789             | 1,867             |                         |                               |                       |                      |
| ID1138          |                      | -11,286            | -4,821              | -10,997             | -2,783            | -1,860            | -1,212            |                         |                               |                       |                      |
| ID1266          |                      | 1,024              | -5,049              | -1,230              | -1,436            | -1,014            | 1,079             |                         |                               |                       |                      |
| ID261244        |                      | -1,864             | -5,306              | -2,407              | -1,633            | -4,152            | -2,015            |                         |                               |                       |                      |
| ID24906         |                      | -4,031             | -5,312              | -20,269             | -27,075           | -1,806            | -23,951           |                         |                               |                       |                      |
| ID1366          |                      | -2,311             | -5,496              | -2,778              | -3,101            | -1,424            | -1,047            |                         |                               |                       |                      |
| ID25932         |                      | -3,521             | -5,908              | -3,556              | -7,077            | -3,765            | -2,814            |                         |                               |                       |                      |
| ID1223          |                      | -5,219             | -6,413              | -7,877              | -1,116            | -1,495            | 1,113             |                         |                               |                       |                      |
| ID2917416       |                      | -4,480             | -6,602              | -4,329              | -3,047            | -1,115            | 1,079             |                         |                               |                       |                      |
| ID1797353       |                      | -4,341             | -7,015              | -4,394              | -3,321            | -3,699            | -2,975            |                         |                               |                       |                      |
| ID300154        |                      | -4,114             | -7,377              | -3,251              | -4,223            | -3,968            | -2,176            |                         |                               |                       |                      |
| ID2110071       |                      | -5,866             | -7,704              | -5,202              | -8,260            | -6,699            | -5,815            |                         |                               |                       |                      |
| ID2138752       |                      | 2,173              | -8,361              | 1,583               | 4,390             | 1,579             | 1,005             |                         |                               |                       |                      |
| ID51803         |                      | -2,721             | -9,166              | -2,865              | -23,808           | -3,387            | -1,906            |                         |                               |                       |                      |
| ID1657          |                      | -13,654            | -9,739              | -2,466              | -3,349            | 1,133             | -5,519            |                         |                               |                       |                      |
| ID1327          |                      | -1,092             | -11,077             | 3468,355            | -144,490          | n.d.              | n.d.              |                         |                               |                       |                      |
| ID178566        |                      | -11,630            | -11,965             | -6,128              | -5,041            | -2,089            | 1,001             |                         |                               |                       |                      |
| ID1785181       |                      | -2,693             | -14,067             | -1,935              | -6,360            | -4,789            | -26,988           |                         |                               |                       |                      |
| ID1763803       |                      | -2,890             | -14,777             | -2,269              | -79,397           | -14,935           | -18,357           |                         |                               |                       |                      |
| ID1543          |                      | -6,094             | -16,824             | -1,789              | -24,539           | -11,049           | -29,354           |                         |                               |                       |                      |
| ID2106278       |                      | -2,500             | -20,869             | -2,380              | -12,788           | -11,369           | -7,042            |                         |                               |                       |                      |
| ID1615          |                      | -3,328             | -21,266             | -1,913              | -23,958           | -1374,679         | -14,475           |                         |                               |                       |                      |
| ID232052        |                      | -1,344             | -21,467             | -3,242              | 1,347             | -1,140            | -1,069            |                         |                               |                       |                      |
| ID2314456       |                      | -5,179             | -22,092             | -17,031             | 3,445             | -1,034            | 1,839             |                         |                               |                       |                      |

Table S-2

| ID <sup>1</sup> | Protein <sup>2</sup> | 0 min <sup>3</sup> | 30 min <sup>3</sup> | 60 min <sup>3</sup> | 24 h <sup>3</sup> | 48 h <sup>3</sup> | 72 h <sup>3</sup> | IPA symbol <sup>4</sup> | Entrez gene name <sup>5</sup> | location <sup>6</sup> | type(s) <sup>7</sup> |
|-----------------|----------------------|--------------------|---------------------|---------------------|-------------------|-------------------|-------------------|-------------------------|-------------------------------|-----------------------|----------------------|
| ID146603        |                      | -1,939             | -34,706             | -1,444              | 1,120             | -1,263            | 1,055             |                         |                               |                       |                      |
| ID183880        |                      | -69,551            | -35,239             | -64,293             | -2,270            | -1,790            | -1,582            |                         |                               |                       |                      |
| ID1780185       |                      | -1,819             | -47,689             | -2,076              | -18,279           | -6,578            | -7,423            |                         |                               |                       |                      |
| ID2977290       |                      | -46,268            | -102,311            | -3,238              | -3,243            | -2,094            | -3,332            |                         |                               |                       |                      |
| ID3464756       |                      | -3,019             | -228,727            | -3,907              | -3,112            | -2,112            | 1,332             |                         |                               |                       |                      |
| ID1302          |                      | 1,488              | -253,707            | 1,356               | -5,395            | -793,377          | 1,047             |                         |                               |                       |                      |
| ID1677          |                      | -1,361             | -634,735            | -1,876              | 4,663             | 4,184             | 3,012             |                         |                               |                       |                      |

**Table S-3: Summary results from network-analysis using Ingenuity Pathway Analysis (IPA) for each time point.**

Spot-lists of MALDI-TOF-MS identified proteins from statistical-analyses of each time point were analysed.

Resulting networks, molecular and cellular functions, as well as “Top Tox Lists” and the respective scores are displayed.

The same categories of “Top Tox Lists” or “molecular and cellular functions” were coloured equally.

Table S-3

|               | rank | Associated Network Functions                                                                | score |
|---------------|------|---------------------------------------------------------------------------------------------|-------|
| <b>0 min</b>  | 1    | Post-translational modification, protein folding, cancer                                    | 46    |
|               | 2    | Cell morphology, cancer, reproductive system disease                                        | 43    |
|               | 3    | Cancer, reproductive system disease, cellular assembly and organization                     | 43    |
|               | 4    | Post-translational modification, protein degradation, cell death                            | 42    |
|               | 5    | Carbohydrate metabolism, small molecule biochemistry, immunological disease                 | 41    |
| <b>30 min</b> | 1    | Cancer, reproductive system disease, cardiovascular disease                                 | 47    |
|               | 2    | Protein synthesis, cancer, RNA post-translational modification                              | 41    |
|               | 3    | DNA replication, recombination and repair, energy production, nucleic acid metabolism       | 40    |
|               | 4    | Cell morphology, genetic disorder, neurological disease                                     | 39    |
|               | 5    | Post-translational modification, protein folding, amino acid metabolism                     | 39    |
| <b>60 min</b> | 1    | Infection mechanism, organismal development, lipid metabolism                               | 52    |
|               | 2    | Cancer, reproductive system disease, cardiovascular disease                                 | 49    |
|               | 3    | Post-translational modification, protein folding, cellular function and maintenance         | 47    |
|               | 4    | Neurological disease, cancer, genetic disorder                                              | 46    |
|               | 5    | Post-translational modification, protein folding, genetic disorder                          | 26    |
| <b>24 h</b>   | 1    | Cancer, reproductive system disease, cardiovascular disease                                 | 42    |
|               | 2    | Gene expression, post-translational modification, cellular assembly and organization        | 40    |
|               | 3    | Amino acid metabolism, post-translational modification, small molecule biochemistry         | 35    |
|               | 4    | Cancer, cellular assembly and organization, small molecule biochemistry                     | 33    |
|               | 5    | Tumor morphology, cell death, DNA replication, recombination and repair                     | 33    |
| <b>48 h</b>   | 1    | Post-translational modification, protein folding, infectious disease                        | 52    |
|               | 2    | Cellular assembly and organization, cancer, reproductive system disease                     | 46    |
|               | 3    | Cell death, neurological disease, organismal injury and abnormalities                       | 33    |
|               | 4    | DNA replication, recombination and repair, cardiovascular disease, infection mechanism      | 31    |
|               | 5    | Protein synthesis, skeletal and muscular system development and function, tissue morphology | 28    |

Table S-3

| 72 h | rank | Associated Network Functions                                                                                   | score |
|------|------|----------------------------------------------------------------------------------------------------------------|-------|
|      | 1    | Cellular assembly and organization, cancer, reproductive system disease                                        | 51    |
|      | 2    | DNA replication, recombination and repair, post-translational modification, protein folding                    | 49    |
|      | 3    | Infection mechanism, infectious disease, amino acid metabolism                                                 | 25    |
|      | 4    | Cell-to-cell signalling and interaction, cellular assembly and organization, cellular function and maintenance | 22    |
|      | 5    | Cell death, infection mechanism, cell cycle                                                                    | 19    |

Table S-3

|               | rank | Top Tox lists                                                                                                                                               | p-value / ratio           |
|---------------|------|-------------------------------------------------------------------------------------------------------------------------------------------------------------|---------------------------|
| <b>0 min</b>  | 1    | 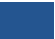 Oxidative stress                                                          | 1.20E-05 / 7/57 (0.123)   |
|               | 2    | 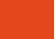 Nrf2 mediated oxidative stress response                                   | 5.28E-04 / 10/205 (0.049) |
|               | 3    | 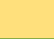 Mitochondrial dysfunction                                                 | 7.42E-03 / 6/125 (0.048)  |
|               | 4    | 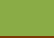 Mechanism of gene regulation by peroxisome proliferators via PPAR alpha   | 4.13E-02 / 4/95 (0.042)   |
|               | 5    | 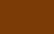 G2/M transition of the cell cycle                                         | 8.24E-02 / 2/35 (0.057)   |
| <b>30 min</b> | 1    |  Nrf2 mediated oxidative stress response                                   | 1.95E-03 / 10/205 (0.049) |
|               | 2    | 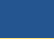 Oxidative stress                                                          | 2.28E-03 / 5/57 (0.088)   |
|               | 3    | 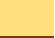 Mitochondrial dysfunction                                                 | 4.31E-03 / 7/125 (0.056)  |
|               | 4    | 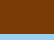 G2/M transition of the cell cycle                                         | 1.89E-02 / 3/35 (0.086)   |
|               | 5    | 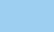 Cholesterol biosynthesis                                                  | 2.71E-02 / 2/16 (0.125)   |
| <b>60 min</b> | 1    | 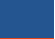 Oxidative stress                                                          | 7.95E-04 / 5/57 (0.088)   |
|               | 2    | 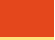 Nrf2 mediated oxidative stress response                                   | 4.93E-03 / 8/205 (0.039)  |
|               | 3    | 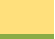 Mitochondrial dysfunction                                                 | 2.22E-02 / 5/125 (0.04)   |
|               | 4    | 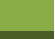 Mechanism of gene regulation by peroxisome proliferators via PPAR alpha   | 1.22E-01 / 3/95 (0.032)   |
|               | 5    | 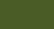 Aryl hydrocarbon receptor signalling                                      | 1.29E-01 / 4/151 (0.026)  |
| <b>24 h</b>   | 1    | 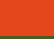 Nrf2 mediated oxidative stress response                                   | 8.63E-05 / 12/205 (0.059) |
|               | 2    | 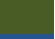 Aryl hydrocarbon receptor signalling                                     | 5.79E-04 / 9/151 (0.06)   |
|               | 3    | 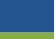 Oxidative stress                                                        | 1.86E-03 / 5/57 (0.088)   |
|               | 4    | 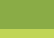 Mechanism of gene regulation by peroxisome proliferators via PPAR alpha | 1.60E-02 / 5/95 (0.053)   |
|               | 5    | 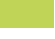 PPAR alpha/RXR alpha activation                                         | 4.46E-02 / 6/166 (0.036)  |
| <b>48 h</b>   | 1    | 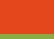 Nrf2 mediated oxidative stress response                                 | 6.69E-03 / 6/205 (0.029)  |
|               | 2    | 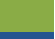 Mechanism of gene regulation by peroxisome proliferators via PPAR alpha | 7.57E-03 / 4/95 (0.042)   |
|               | 3    | 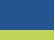 Oxidative stress                                                        | 1.12E-02 / 3/57 (0.053)   |
|               | 4    | 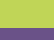 PPAR alpha/RXR alpha activation                                         | 4.59E-02 / 4/166 (0.024)  |
|               | 5    | 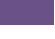 PXR/RXR activation                                                      | 1.06E-01 / 2/68 (0.029)   |

Table S-3

| 72 h | rank | Top Tox lists                                                                                                                                             | p-value / ratio          |
|------|------|-----------------------------------------------------------------------------------------------------------------------------------------------------------|--------------------------|
|      | 1    | 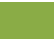 Mechanism of gene regulation by peroxisome proliferators via PPAR alpha | 3.94E-03 / 4/95 (0.042)  |
|      | 2    | 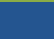 Oxidative stress                                                        | 6.77E-03 / 3/57 (0.053)  |
|      | 3    |  Nrf2 mediated oxidative stress response                                 | 1.28E-02 / 5/205 (0.024) |
|      | 4    | 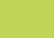 PPAR alpha/RXR alpha activation                                         | 2.63E-02 / 4/166 (0.024) |
|      | 5    | 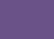 PXR/RXR activation                                                      | 7.76E-02 / 2/68 (0.029)  |

Table S-3

|               | rank | Molecular and cellular functions                                                                                              | p-value / molecules       |
|---------------|------|-------------------------------------------------------------------------------------------------------------------------------|---------------------------|
| <b>0 min</b>  | 1    |  cell death                                  | 3.26E-11 - 2.71E-02 / 101 |
|               | 2    |  post-translational modification             | 3.26E-11 - 2.71E-02 / 55  |
|               | 3    |  protein folding                             | 4.65E-11 - 2.71E-02 / 43  |
|               | 4    |  cellular growth and proliferation           | 2.32E-08 - 1.59E-02 / 40  |
|               | 5    |  cellular function and maintainance          | 2.32E-08 - 1.37E-02 / 15  |
| <b>30 min</b> | 1    |  post-translational modification             | 8.29E-14 - 2.71E-02 / 42  |
|               | 2    | 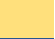 protein folding                             | 8.29E-14 - 1.62E-02 / 16  |
|               | 3    | 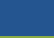 cell death                                  | 4.05E-13 - 2.73E-02 / 110 |
|               | 4    | 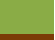 cellular growth and proliferation           | 1.18E-07 - 1.46E-02 / 67  |
|               | 5    | 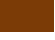 cellular function and maintainance          | 2.71E-07 - 2.70E-02 / 35  |
| <b>60 min</b> | 1    | 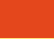 post-translational modification             | 1.95E-15 - 2.54E-02 / 37  |
|               | 2    | 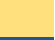 protein folding                             | 1.95E-15 - 1.28E-02 / 16  |
|               | 3    | 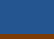 cell death                                  | 7.86E-10 - 2.63E-02 / 86  |
|               | 4    | 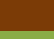 cellular function and maintainance          | 2.89E-08 - 2.54E-02 / 31  |
|               | 5    | 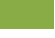 cellular growth and proliferation           | 1.77E-07 - 2.54E-02 / 52  |
| <b>24 h</b>   | 1    | 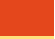 post-translational modification             | 1.11E-11 - 2.48E-02 / 40  |
|               | 2    | 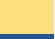 protein folding                            | 1.11E-11 - 2.88E-04 / 14  |
|               | 3    |  cell death                                | 1.14E-10 - 2.86E-02 / 96  |
|               | 4    | 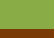 cellular growth and proliferation         | 1.43E-10 - 2.25E-02 / 67  |
|               | 5    | 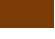 cellular function and maintainance        | 1.50E-08 - 2.48E-02 / 31  |
| <b>48 h</b>   | 1    | 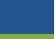 cell death                                | 1.90E-06 - 4.01E-02 / 49  |
|               | 2    | 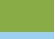 cellular growth and proliferation         | 2.41E-06 - 3.22E-02 / 35  |
|               | 3    | 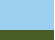 cellular assembly and organization        | 2.44E-06 - 4.26E-02 / 35  |
|               | 4    | 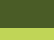 DNA replication, recombination and repair | 7.10E-06 - 3.47E-02 / 21  |
|               | 5    | 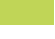 cellular movement                         | 3.79E-05 - 4.01E-02 / 23  |

Table S-3

72 h

|   |                                                                                   |                                           |                          |
|---|-----------------------------------------------------------------------------------|-------------------------------------------|--------------------------|
| 1 | 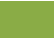 | cellular growth and proliferation         | 6.58E-07 -4.91E-02 / 32  |
| 2 |  | cell death                                | 7.20E-07 - 4.91E-02 / 43 |
| 3 | 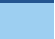 | cellular assembly and organization        | 3.40E-06 - 4.64E-02 / 33 |
| 4 | 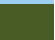 | DNA replication, recombination and repair | 3.40E-06 - 3.87E-02 / 20 |
| 5 | 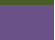 | RNA post-translational modification       | 1.63E-04 - 6.77E-03 / 6  |

Table S-3

**Table S-4: Detailed information on proteins/genes of all ten K-means clusters**

<sup>1</sup> hit ID obtained from Delta2D analysis (Delta2D statistically software version 4.4, Decodon (Germany, Greifswald))

<sup>2</sup> protein identification corresponding to human proteins (UniProt-SwissProt database; Rel. 51.5 restricted to human taxonomy)

<sup>3</sup> mean values of Z-scores of four replicates of each (control, plasma-treated samples, 0, 0.5, 1, 24, 48, 72 h)

Table S-4: cluster 1

| Cluster 1 | Z-score <sup>13</sup> |                       |              |           |           |           |           |           |           |           |           |           |           |           |           |
|-----------|-----------------------|-----------------------|--------------|-----------|-----------|-----------|-----------|-----------|-----------|-----------|-----------|-----------|-----------|-----------|-----------|
|           | ID <sup>1</sup>       | Protein <sup>12</sup> | co_0 min     | co_30 min | co_60 min | co_24 h   | co_48 h   | co_72 h   | PI_0 min  | PI_30 min | PI_60 min | PI_24 h   | PI_48 h   | PI_72 h   |           |
| ID1212    | TCPA<br>2AAA          |                       | -0.424318    | 0.394877  | -1.251199 | -0.215585 | -1.125894 | -0.636255 | 0.700078  | 2.086237  | 0.286998  | 0.057519  | 0.063910  | 0.078012  |           |
| ID337908  |                       |                       | -0.314066    | -0.503743 | -0.171196 | -0.306789 | -1.639089 | -1.056021 | 0.534570  | 2.005223  | 0.786007  | 1.011595  | 0.083715  | -0.177309 |           |
| ID17707   |                       |                       | -0.481389    | -0.931144 | -0.840362 | -1.098343 | -1.370938 | 0.008203  | 0.308428  | 2.003950  | 0.610216  | 1.213270  | 0.730378  | 0.151048  |           |
| ID29990   |                       |                       | -0.237644    | -0.426812 | 0.044905  | -0.464847 | -1.211697 | -0.860936 | 1.108427  | 1.989185  | 1.520625  | -0.432785 | -0.432816 | -0.703801 |           |
| ID801     |                       |                       | 0.328879     | -1.082253 | 0.690083  | -1.170179 | -0.612393 | -0.769382 | -0.023836 | 1.983072  | 0.898672  | 0.605264  | 0.233176  | -0.929787 |           |
| ID1802534 |                       |                       | -0.192365    | -0.450083 | -0.223509 | -0.202945 | -0.458889 | -0.804559 | 0.522840  | 1.884237  | 0.465373  | 0.672573  | 0.391302  | -1.435831 |           |
| ID1799192 |                       |                       | -0.058520    | -0.439814 | -0.213487 | -0.675517 | -0.961821 | -0.971986 | 0.860352  | 1.838554  | 0.975089  | 0.980608  | 0.312842  | -1.401149 |           |
| ID1512    |                       | CATB                  |              | 0.045507  | -0.732217 | -0.175643 | -0.930707 | -1.138316 | -0.998309 | 1.206237  | 1.812000  | 1.500098  | 0.482647  | -0.216759 | -0.733876 |
| ID97395   |                       |                       |              | 0.449251  | -0.279115 | 0.707949  | -0.998109 | -0.775392 | -1.481416 | 0.375060  | 1.767685  | 0.390921  | 0.316068  | 0.340036  | -0.733921 |
| ID825     |                       | GDIA                  | ANXA3, NUCB1 | 0.056478  | -0.720333 | 0.115940  | -1.264369 | -1.182949 | -1.373503 | 0.731834  | 1.748653  | 1.235829  | 0.903903  | 0.348437  | -0.373945 |
| ID848     |                       | 0.220537              |              | -0.421408 | 0.245731  | -0.978766 | -1.096063 | -0.626077 | 0.898598  | 1.744874  | 1.617333  | -0.418083 | -0.871188 | -0.420010 |           |
| ID742     |                       |                       | -0.030712    | -0.836273 | -0.076461 | -1.127388 | -0.085182 | -1.451461 | 0.734442  | 1.736951  | 1.112893  | 0.053485  | 0.163661  | -0.180583 |           |
| ID3227    | NUCB1                 | VIME                  | -0.295595    | -0.851695 | -0.181834 | -1.139240 | -1.127620 | -1.297596 | 0.918562  | 1.731381  | 1.226041  | 0.974006  | 0.429395  | -0.142304 |           |
| ID836     | PDIA3                 | TBA1B                 | 0.053032     | -0.563765 | 0.078625  | -1.289766 | -1.251459 | -1.035296 | 1.335647  | 1.712505  | 1.238349  | 0.254068  | 0.023629  | -0.492053 |           |
| ID238040  |                       |                       | 0.006071     | -0.800709 | -0.301228 | -1.088713 | -1.296255 | -1.161291 | 0.878543  | 1.706118  | 1.123447  | 0.801168  | 0.584649  | -0.251508 |           |
| ID813     | P4HA                  | TCPA, PDIA3, CPNE2    | -0.349540    | -0.375865 | -0.038907 | -0.394431 | -0.975094 | -1.075585 | 0.966801  | 1.701000  | 1.421626  | 0.782203  | 0.028985  | -1.495642 |           |
| ID3406    | IMA7                  |                       |              | -0.333082 | -1.349156 | -0.307276 | -0.605835 | -0.548118 | -0.645820 | 0.297442  | 1.685392  | 0.847637  | 1.304129  | 0.315071  | -0.334353 |
| ID7425    |                       |                       | -0.281229    | -0.899414 | -0.295001 | -1.037609 | -1.572761 | -0.596771 | 1.273792  | 1.668055  | 1.205721  | 0.687386  | 0.341761  | -0.322083 |           |
| ID124300  |                       |                       | -0.219948    | -0.746152 | -0.198008 | -1.393107 | -1.308406 | -1.182152 | 0.612451  | 1.658265  | 0.779508  | 1.186258  | 0.867612  | 0.240244  |           |
| ID266132  |                       |                       | 0.113911     | -0.488887 | 0.145561  | -0.993069 | -0.870598 | -1.796667 | 1.133758  | 1.649396  | 1.268776  | -0.130706 | 0.295331  | -0.359482 |           |
| ID7589    |                       |                       | -0.226846    | -0.780329 | -0.240707 | -1.461114 | -1.382639 | -0.357816 | 1.335007  | 1.616257  | 1.112189  | 0.770709  | 0.194850  | -0.386884 |           |
| ID1502    | CRK                   |                       | 0.281826     | -0.434042 | 0.137063  | -0.651140 | -1.177842 | -1.552867 | 1.186228  | 1.605012  | 1.361212  | 0.622109  | -0.377421 | -0.844610 |           |
| ID407     |                       |                       | -0.178421    | -0.803468 | -0.216164 | -1.298029 | -1.463873 | -0.810840 | 1.223820  | 1.550390  | 1.264759  | 0.716359  | 0.435138  | -0.240582 |           |
| ID828     | GDIA                  | VTDB, 2AAA            | -0.028874    | -0.755763 | -0.032864 | -1.302144 | -1.255093 | -1.465694 | 0.912497  | 1.522687  | 1.210978  | 0.861267  | 0.531189  | 0.017132  |           |
| ID1566    |                       |                       | 0.280451     | -0.593643 | -0.335127 | -0.995199 | -1.122451 | -0.300839 | 0.894555  | 1.520226  | 1.021427  | -0.662210 | 0.090882  | 0.036376  |           |
| ID394     |                       |                       | -0.130831    | -0.830917 | -0.113584 | -1.529694 | -1.363759 | -0.675960 | 0.905595  | 1.515186  | 1.414518  | 0.882182  | 0.452450  | -0.304642 |           |
| ID423     |                       |                       | 0.173682     | -0.630169 | 0.043597  | -1.364992 | -1.375854 | -1.034946 | 0.813657  | 1.497389  | 1.280069  | 0.905380  | 0.495880  | -0.577347 |           |
| ID749     |                       |                       | -0.029211    | -0.774123 | -0.012912 | -1.051619 | -1.232256 | -1.588268 | 1.287859  | 1.490035  | 1.228518  | 0.463473  | 0.384291  | -0.050190 |           |
| ID392     |                       |                       | -0.000845    | -0.774155 | -0.074563 | -1.334440 | -1.395788 | -0.777703 | 0.879853  | 1.487248  | 1.427588  | 0.936565  | 0.430906  | -0.570523 |           |
| ID775     |                       |                       | 0.042198     | -0.674133 | -0.086291 | -1.491527 | -1.378586 | -1.295223 | 0.973104  | 1.482303  | 0.760981  | 0.987662  | 0.723269  | 0.203160  |           |
| ID1114    | ACTB                  |                       | 0.027433     | -0.425219 | 0.090603  | -0.945817 | -1.434845 | -1.685103 | 0.996903  | 1.476822  | 1.092980  | 1.035221  | 0.178817  | -0.148989 |           |
| ID898     |                       |                       | -0.180469    | -0.369897 | -0.420876 | -1.413352 | -1.313611 | -1.134179 | 0.717523  | 1.471557  | 1.038558  | 1.414985  | 0.679022  | -0.135514 |           |
| ID1044    | VIME                  |                       | -0.431599    | 0.610668  | -0.358816 | -0.547889 | -0.708307 | -1.803131 | 1.174836  | 1.464905  | 1.564794  | -0.120613 | -0.061217 | -0.813783 |           |
| ID750     |                       |                       | 0.015082     | -0.632430 | 0.162918  | -0.915139 | -1.208776 | -1.935985 | 0.966564  | 1.462309  | 1.089170  | 0.473780  | 0.533275  | 0.107678  |           |
| ID50273   | NSAP                  | CALR                  | -0.984051    | -1.102674 | -1.101256 | -0.528087 | -0.493707 | -0.394492 | 1.582276  | 1.462069  | 0.072821  | 0.305161  | -0.336654 |           |           |
| ID730     |                       |                       | 0.112514     | -0.462054 | 0.123357  | -0.869185 | -0.337408 | -2.167037 | 0.725495  | 1.442681  | 0.858009  | 0.110650  | 0.469749  | 0.020890  |           |
| ID3179    |                       |                       | -0.059798    | -0.841766 | -0.112797 | -1.314117 | -1.298422 | -1.438491 | 0.857837  | 1.442568  | 1.134209  | 0.857163  | 0.690765  | 0.297140  |           |
| ID713     |                       |                       | 0.303461     | -0.307565 | 0.229983  | -1.324550 | -1.488571 | -1.581637 | 1.058741  | 1.437630  | 1.130516  | 0.472347  | 0.343262  | -0.155531 |           |
| ID773     |                       |                       | 0.070914     | -0.639520 | 0.091555  | -1.335449 | -1.320242 | -1.548457 | 1.084207  | 1.427171  | 1.033086  | 0.699289  | 0.653572  | -0.041303 |           |
| ID802     |                       |                       | 0.019430     | -0.547542 | -0.331658 | -1.479809 | -1.414287 | -0.883093 | 1.132255  | 1.426670  | 1.345289  | 0.876236  | 0.300521  | -0.224953 |           |
| ID370380  | PDIA4                 |                       | -0.903423    | -0.955459 | -0.448436 | -0.404508 | -0.839655 | -1.549562 | 0.933327  | 1.426016  | 1.211079  | 0.303612  | 0.721531  | 0.581380  |           |
| ID858     |                       |                       | 0.011491     | -0.560169 | -0.165595 | -1.242965 | -1.393547 | -1.491416 | 1.078184  | 1.407996  | 1.180517  | 0.844307  | 0.575854  | -0.033580 |           |
| ID29087   |                       |                       | -0.091882    | -0.703374 | -0.016956 | -1.046145 | -1.560352 | -1.406536 | 0.861322  | 1.400934  | 1.081902  | 1.161323  | 0.661749  | 0.238678  |           |
| ID719     |                       |                       | 0.152083     | -0.594269 | 0.190451  | -1.229114 | -1.122979 | -1.697505 | 1.145868  | 1.400105  | 1.287755  | 0.451834  | 0.352273  | -0.223544 |           |
| ID2183    |                       |                       | 0.064492     | -0.537649 | -0.111600 | -1.184458 | -1.461016 | -1.521066 | 1.143368  | 1.399003  | 1.213705  | 0.639115  | 0.522723  | -0.006839 |           |
| ID853     | STABP                 |                       | 0.108637     | -0.515177 | -0.033019 | -1.232607 | -1.461830 | -1.527553 | 1.107612  | 1.398929  | 1.210857  | 0.655232  | 0.485883  | -0.033156 |           |
| ID1559    |                       |                       | -1.003147    | -0.812659 | -1.012889 | -0.659428 | -0.654471 | -0.568134 | 1.522434  | 1.397402  | 1.723026  | 0.583328  | -0.049117 | -0.320513 |           |
| ID782     |                       |                       | 0.123914     | -0.557183 | 0.073696  | -1.230177 | -1.465371 | -1.581325 | 1.124921  | 1.391985  | 1.039323  | 0.714530  | 0.562156  | -0.017835 |           |
| ID751     | TRXR1                 |                       | 0.061769     | -0.653710 | 0.064303  | -1.258639 | -1.409264 | -1.556086 | 1.095376  | 1.389117  | 1.092846  | 0.683730  | 0.607537  | 0.053954  |           |
| ID352255  |                       |                       | -0.281105    | -0.860215 | -0.338992 | -0.744217 | -1.431880 | -1.454841 | 1.041382  | 1.388892  | 1.134991  | 0.567685  | 0.724256  | 0.395967  |           |
| ID42780   |                       |                       | 0.092786     | -0.546944 | 0.148293  | -1.484763 | -1.081628 | -1.559331 | 0.943590  | 1.385020  | 1.133029  | 0.581000  | 0.539427  | -0.005229 |           |
| ID688     | TRFL                  |                       | 0.013914     | -0.690200 | -0.117602 | -1.238142 | -1.391221 | -1.351294 | 1.139124  | 1.384077  | 1.356496  | -0.004811 | 0.709391  | 0.189066  |           |
| ID41789   |                       |                       | -0.064645    | -0.987928 | -0.029485 | -1.671607 | -1.354419 | -0.172294 | 1.088178  | 1.382414  | 1.387693  | 0.293327  | 0.436224  | -0.234127 |           |
| ID45562   |                       |                       | -0.137145    | -0.706259 | -0.217832 | -1.111327 | -1.447368 | -0.732091 | 1.787961  | 1.377955  | 1.197916  | 0.066761  | 0.241520  | -0.303401 |           |
| ID3483954 |                       |                       | 0.007966     | -0.632750 | -0.426460 | -1.219266 | -1.209416 | -1.471652 | 1.153961  | 1.371646  | 1.217959  | 0.869336  | 0.605865  | -0.049855 |           |
| ID754     |                       |                       | 0.101660     | -0.612958 | 0.118678  | -1.196333 | -1.380543 | -1.514765 | 1.134777  | 1.371110  | 1.248776  | 0.605316  | 0.430736  | -0.155124 |           |
| ID43156   |                       |                       | 0.050024     | -0.547026 | 0.017744  | -1.515339 | -1.193995 | -1.466306 | 0.966216  | 1.368458  | 1.135044  | 0.880304  | 0.467573  | 0.057381  |           |

Table S-4: cluster 1

| ID <sup>1</sup> | Protein <sup>12</sup> |             | co_0 min  | co_30 min | co_60 min | co_24 h   | co_48 h   | co_72 h   | PI_0 min  | PI_30 min | PI_60 min | PI_24 h   | PI_48 h   | PI_72 h   |
|-----------------|-----------------------|-------------|-----------|-----------|-----------|-----------|-----------|-----------|-----------|-----------|-----------|-----------|-----------|-----------|
| ID756           | ALDOA                 | NNMT, CLIC4 | 0,130377  | -0,636934 | 0,103914  | -1,254082 | -1,402937 | -1,499638 | 1,179558  | 1,368434  | 1,225646  | 0,582376  | 0,429995  | -0,081115 |
| ID1828633       |                       |             | 0,390420  | -0,501952 | 0,170260  | -1,340836 | -1,397950 | -1,548516 | 1,047548  | 1,362878  | 1,143230  | 0,506946  | 0,477701  | -0,182991 |
| ID9044          |                       |             | 0,136095  | -0,634039 | 0,033701  | -1,451435 | -1,512567 | -0,911809 | 0,810623  | 1,361677  | 1,129367  | 1,092847  | 0,740299  | -0,521548 |
| ID3128108       |                       |             | -0,056971 | -0,773959 | -0,142404 | -1,222867 | -1,354494 | -1,233270 | 1,047704  | 1,356772  | 1,121489  | 0,642093  | 0,574009  | 0,020419  |
| ID714           |                       |             | 0,204615  | -0,542766 | 0,212171  | -1,377503 | -1,275629 | -1,570966 | 1,066309  | 1,353081  | 1,268085  | 0,484918  | 0,421529  | -0,122615 |
| ID2404447       |                       |             | 0,136442  | -0,553728 | -0,092383 | -1,202197 | -1,362957 | -1,650466 | 1,063476  | 1,339245  | 1,213946  | 0,583148  | 0,651601  | 0,019661  |
| ID774           |                       |             | 0,023552  | -0,750875 | -0,000331 | -1,417676 | -1,337118 | -1,418855 | 1,037403  | 1,337101  | 1,014070  | 0,907221  | 0,730915  | 0,101397  |
| ID437           |                       |             | 0,125521  | -0,625877 | 0,125573  | -1,517374 | -1,563679 | -0,594901 | 0,412378  | 1,330949  | 0,910308  | 1,236332  | 1,076353  | -0,606500 |
| ID1478          |                       |             | -0,619418 | -0,134469 | 0,001347  | -1,363818 | -0,814937 | -0,161787 | 0,187644  | 1,323948  | 0,622834  | 2,557703  | -0,351682 | -0,607937 |
| ID2200          |                       |             | 0,132219  | -0,468359 | -0,217526 | -1,235387 | -1,468645 | -1,505381 | 1,191537  | 1,317767  | 1,191010  | 0,686559  | 0,546647  | 0,001200  |
| ID1015          | UBQL1                 | UBQL1, IRGQ | 0,083409  | -0,600092 | -0,148791 | -1,298000 | -1,430219 | -1,428476 | 1,253771  | 1,315444  | 1,178128  | 0,690339  | 0,514604  | 0,042470  |
| ID2729506       |                       |             | 0,033732  | -0,663437 | 0,043766  | -1,491890 | -1,477741 | -1,310912 | 0,952189  | 1,302867  | 0,955074  | 0,943466  | 0,763355  | 0,185398  |
| ID764           |                       |             | -0,028691 | -0,744396 | -0,078405 | -1,330230 | -1,434380 | -1,456792 | 0,907688  | 1,296266  | 1,036353  | 0,898891  | 0,807483  | 0,350935  |
| ID40401         |                       |             | 0,194568  | -0,534625 | 0,202545  | -1,389167 | -1,333228 | -1,610097 | 1,021943  | 1,295456  | 1,215892  | 0,661195  | 0,473480  | -0,032664 |
| ID237648        |                       |             | 0,174473  | -0,741317 | 0,017635  | -1,235239 | -1,888328 | -0,610874 | 1,115315  | 1,294307  | 1,081792  | 0,900923  | 0,347173  | -0,230630 |
| ID41097         |                       |             | 0,112031  | -0,602873 | 0,108911  | -1,546538 | -1,449399 | -1,179440 | 1,036858  | 1,291514  | 1,213573  | 0,852887  | 0,438494  | -0,062797 |
| ID767           |                       |             | -0,131145 | -0,815449 | -0,170898 | -1,397340 | -1,370477 | -1,348800 | 0,840525  | 1,285299  | 0,988381  | 1,011538  | 0,900915  | 0,460335  |
| ID1230          |                       |             | -1,342959 | -1,088603 | -0,711950 | 0,343723  | -1,327994 | -0,348821 | 0,926720  | 1,284402  | 0,902745  | 0,603706  | 0,264487  | 0,645471  |
| ID851           |                       |             | 0,148911  | -0,515702 | -0,261013 | -1,317473 | -1,457905 | -1,379064 | 1,223456  | 1,282259  | 1,234579  | 0,738585  | 0,529011  | -0,041000 |
| ID770           |                       |             | 0,165325  | -0,541379 | 0,134679  | -1,321117 | -1,507991 | -1,566082 | 1,018819  | 1,281315  | 1,082647  | 0,766967  | 0,605257  | 0,073203  |
| ID1178          | TSNAX                 | 2AAA        | 0,104181  | -0,128195 | 0,516689  | -0,558345 | -0,855091 | -1,198346 | -0,083278 | 1,281241  | 0,584900  | -0,436689 | 1,217010  | -0,553250 |
| ID108562        |                       |             | 0,255526  | -0,472497 | 0,121243  | -1,178667 | -0,422986 | -1,968066 | 0,920881  | 1,279872  | 1,073438  | 0,129601  | 0,445417  | -0,151363 |
| ID1335          |                       |             | 0,119638  | -0,106528 | 0,299211  | -1,254097 | -1,124018 | -1,012865 | 1,020493  | 1,277989  | 1,497196  | -1,746881 | 0,604486  | -0,448065 |
| ID776           |                       |             | -0,095253 | -0,832138 | -0,141700 | -1,399576 | -1,361404 | -1,378568 | 0,815086  | 1,265732  | 0,944440  | 1,001078  | 0,929598  | 0,502975  |
| ID3762296       |                       |             | -0,074753 | -0,552880 | -0,258081 | -1,290046 | -1,507248 | -1,328186 | 0,937990  | 1,265313  | 1,222678  | 0,860101  | 0,799332  | 0,140805  |
| ID132415        |                       |             | 0,159226  | -0,476421 | 0,116088  | -1,244317 | -1,453703 | -1,540055 | 1,091521  | 1,264733  | 1,198444  | 0,559075  | 0,510725  | -0,045547 |
| ID842           |                       |             | 0,149924  | -0,525545 | -0,201091 | -1,265567 | -1,465506 | -1,512560 | 1,151374  | 1,257887  | 1,205296  | 0,699834  | 0,608209  | 0,072703  |
| ID1466          |                       |             | -1,051077 | -0,895959 | -0,928217 | -0,785497 | -0,813528 | -0,835110 | 1,128323  | 1,254063  | 1,787144  | 0,751506  | 0,506438  | 0,069791  |
| ID267419        |                       |             | -0,081801 | -0,176838 | 0,578220  | -0,404945 | -0,250941 | -1,959388 | 0,662873  | 1,248324  | 0,571516  | -0,447983 | 0,188587  | -0,541500 |
| ID846           |                       |             | 0,200181  | -0,499884 | -0,179243 | -1,292425 | -1,467001 | -1,505826 | 1,139027  | 1,247381  | 1,212025  | 0,723900  | 0,582378  | 0,020463  |
| ID845           | MCM6                  | 2AAA        | 0,108626  | -0,469441 | -0,276392 | -1,430346 | -1,420433 | -1,337156 | 1,108867  | 1,247198  | 1,216239  | 0,844882  | 0,666683  | -0,047506 |
| ID759           |                       |             | 0,213883  | -0,441607 | -0,126638 | -1,361307 | -1,525676 | -1,469731 | 1,083331  | 1,233165  | 1,173337  | 0,794225  | 0,571904  | 0,053673  |
| ID3316          |                       |             | 0,111486  | -0,629362 | 0,057593  | -1,404578 | -1,450415 | -1,471549 | 1,042238  | 1,232328  | 1,138396  | 0,810157  | 0,632122  | 0,134124  |
| ID785           |                       |             | 0,194611  | -0,427754 | -0,101862 | -1,332644 | -1,563433 | -1,434739 | 1,194963  | 1,230564  | 1,185953  | 0,704452  | 0,502698  | 0,023303  |
| ID1475          |                       |             | 0,755422  | -0,045508 | 0,402102  | -0,933211 | -0,593180 | -1,462109 | 1,374737  | 1,230542  | 1,103550  | -0,553161 | -0,437913 | -0,819562 |
| ID755           |                       |             | 0,202491  | -0,432225 | -0,127419 | -1,326996 | -1,553462 | -1,468729 | 1,166901  | 1,226119  | 1,169166  | 0,704141  | 0,554570  | 0,061477  |
| ID413           |                       |             | 0,169058  | -0,627230 | 0,097099  | -1,272226 | -1,470104 | -1,343889 | 1,159137  | 1,216819  | 1,142593  | 0,782129  | 0,671191  | -0,329046 |
| ID102094        |                       |             | -0,048672 | -0,760897 | -0,045898 | -1,349677 | -1,385184 | -1,416990 | 0,634714  | 1,213480  | 0,855920  | 1,274056  | 0,897411  | 0,450251  |
| ID412           |                       |             | 0,209533  | -0,652613 | 0,068512  | -1,225387 | -1,576372 | -1,042092 | 1,187293  | 1,210177  | 1,161716  | 0,704470  | 0,568633  | -0,437753 |
| ID416           |                       |             | -0,021673 | -0,953352 | -0,118209 | -0,841362 | -1,525669 | -1,075006 | 1,100951  | 1,190600  | 1,122839  | 0,736987  | 0,954463  | -0,386322 |
| ID916           | GRP78                 | TRFL        | 0,112633  | -0,497010 | -0,213149 | -1,308472 | -1,513149 | -1,480887 | 1,180725  | 1,188996  | 1,052696  | 0,925643  | 0,626758  | 0,156628  |
| ID769           |                       |             | 0,137638  | -0,561682 | 0,094175  | -1,357386 | -1,502715 | -1,538648 | 1,047960  | 1,184940  | 1,082330  | 0,838281  | 0,638752  | 0,145927  |
| ID181505        |                       |             | -0,287443 | -1,006664 | 0,080803  | -0,791859 | -0,479695 | -1,387369 | 1,614745  | 1,184320  | 1,113886  | 0,634627  | 0,184442  | -0,701135 |
| ID3763623       |                       |             | -0,177041 | -0,533866 | -0,040323 | -0,434310 | -0,801478 | -1,087709 | 0,956320  | 1,178952  | 1,403758  | 0,447766  | 0,214519  | -1,014647 |
| ID662           |                       |             | -0,619564 | -0,139439 | 0,108500  | -0,656662 | -0,963329 | -1,148933 | -0,399128 | 1,177553  | 0,083716  | 2,966097  | 0,205298  | 0,127415  |
| ID594           |                       |             | -0,576442 | -0,820201 | -0,216369 | -0,781551 | -1,028173 | 0,409619  | 1,203050  | 1,169118  | 1,153571  | 0,506201  | -0,192183 | -0,700089 |
| ID683           |                       |             | -0,193313 | -0,708576 | -0,248869 | -0,776111 | -1,189151 | -1,011670 | 0,790920  | 1,168920  | 0,935017  | 0,465139  | 0,678182  | 0,205795  |
| ID418           |                       |             | 0,343000  | -0,361664 | 0,255471  | -1,399601 | -1,593893 | -1,303391 | 1,124898  | 1,160623  | 1,083534  | 0,572424  | 0,649630  | -0,387925 |
| ID1844173       |                       |             | -0,132014 | -0,643179 | -0,505030 | -0,925802 | -1,386912 | -1,425390 | 1,408441  | 1,158894  | 1,370104  | 0,575913  | 0,493576  | 0,155378  |
| ID841           | K1C9                  | KAP0        | 0,049114  | -0,506739 | -0,324925 | -1,310988 | -1,516691 | -1,437100 | 1,136827  | 1,152684  | 0,968667  | 1,096111  | 0,740505  | 0,246437  |
| ID419           |                       |             | 0,350313  | -0,346157 | 0,256486  | -1,517459 | -1,573225 | -1,126883 | 1,218727  | 1,150507  | 1,098920  | 0,597963  | 0,481911  | -0,441613 |
| ID3078712       |                       |             | -0,039548 | 0,245659  | -0,074846 | -0,470923 | -1,620388 | -0,670338 | 0,857034  | 1,143785  | 1,341638  | -0,167791 | -0,694900 | 0,108672  |
| ID265686        |                       |             | 0,433959  | -0,026746 | 0,500307  | -0,950295 | -1,082695 | -2,032425 | 0,855500  | 1,128254  | 0,937516  | 0,045480  | 0,327339  | -0,124825 |
| ID417           |                       |             | 0,361908  | -0,506228 | 0,221497  | -1,257205 | -1,547369 | -1,325425 | 1,004227  | 1,123651  | 1,033632  | 0,792330  | 0,706645  | -0,409580 |
| ID2076081       |                       |             | -0,017384 | -0,373703 | -0,004795 | -0,157874 | -0,039047 | -1,445490 | 0,536148  | 1,119449  | 1,118362  | 0,211970  | 0,125200  | -1,019845 |
| ID589226        |                       |             | -0,312609 | -0,301509 | -0,483156 | -1,057662 | -1,417516 | -0,738711 | 0,432868  | 1,110728  | 1,146581  | 0,739663  | 0,703548  | 0,362691  |
| ID748           |                       |             | 0,163880  | -0,525364 | -0,182639 | -1,300930 | -1,551878 | -1,508938 | 1,086615  | 1,100571  | 1,051180  | 0,929526  | 0,763802  | 0,206556  |
| ID745           |                       |             | 0,123400  | -0,561357 | -0,185117 | -1,302078 | -1,518948 | -1,462124 | 1,180566  | 1,086276  | 1,174948  | 0,859414  | 0,666701  | 0,153173  |
| ID39482         |                       |             | 0,401458  | -0,424579 | 0,296777  | -1,409892 | -1,728883 | -0,887076 | 1,282131  | 1,083882  | 1,038937  | 0,663153  | 0,341422  | -0,491542 |

Table S-4: cluster 1

| ID <sup>1</sup> | Protein <sup>12</sup> |                    | co_0 min  | co_30 min | co_60 min | co_24 h   | co_48 h   | co_72 h   | PI_0 min  | PI_30 min | PI_60 min | PI_24 h   | PI_48 h   | PI_72 h   |
|-----------------|-----------------------|--------------------|-----------|-----------|-----------|-----------|-----------|-----------|-----------|-----------|-----------|-----------|-----------|-----------|
| ID729           | CPNE1                 | GRP75, PDIA4       | -0,210013 | -0,524211 | -0,219550 | -1,185680 | -1,255215 | -1,240521 | 1,404051  | 1,067167  | 1,262727  | 1,066546  | 0,229890  | -0,128555 |
| ID668           |                       |                    | -0,178457 | 0,126805  | -0,101334 | -0,792066 | -1,957800 | 0,226291  | 0,954580  | 1,057943  | 0,997437  | 1,055733  | -0,503770 | -0,621428 |
| ID57776         |                       |                    | -0,380779 | 0,023237  | -0,413100 | -1,949458 | -0,756423 | -0,333946 | 0,826454  | 1,052364  | 1,002497  | 1,505684  | 0,145323  | -0,345432 |
| ID3479720       |                       |                    | 0,036180  | -0,692903 | -0,389182 | -0,977644 | -1,805944 | -1,073013 | 1,230820  | 1,020911  | 1,181686  | 0,845228  | 0,683778  | 0,151388  |
| ID43845         | PDIA4                 |                    | -0,463542 | -0,776744 | -0,582574 | -0,988304 | -0,800939 | -0,290239 | 0,831649  | 1,020201  | 1,089290  | 2,179064  | -0,317712 | -0,355384 |
| ID660           |                       |                    | 0,296611  | -0,195235 | 0,093785  | -1,297337 | -2,280825 | -0,681453 | 0,916921  | 1,020081  | 0,985132  | 0,160280  | 0,674375  | 0,347736  |
| ID747           |                       |                    | 0,195357  | -0,514842 | -0,180459 | -1,293442 | -1,588822 | -1,523284 | 1,056979  | 1,010542  | 0,946096  | 1,030485  | 0,851059  | 0,267952  |
| ID20414         |                       |                    | -0,296922 | -1,128648 | -0,450060 | -0,742138 | -1,491897 | -0,994312 | 0,583417  | 1,002894  | 0,665285  | 1,157586  | 1,258353  | 0,725838  |
| ID628           | HS90A                 | HS90A              | -0,016201 | -0,578391 | -0,111003 | -1,363913 | -1,663706 | -1,131882 | 1,056513  | 1,000707  | 1,094448  | 0,967619  | 0,816646  | 0,171067  |
| ID1867746       | SDC10                 | AGM1, NDUS1, WDR72 | 0,291550  | -0,030055 | 0,373661  | -0,388093 | -1,036375 | -1,570222 | 1,088980  | 1,000191  | 0,693194  | -0,263628 | 1,247836  | -0,572947 |
| ID1811207       |                       |                    | -0,219877 | -0,531917 | -0,406545 | 0,011453  | -1,995708 | -0,856166 | 1,609767  | 0,997056  | 0,963298  | 0,382573  | 0,239599  | -0,097889 |
| ID697           |                       |                    | -0,015159 | -0,310147 | -0,215831 | -1,441901 | -1,802065 | -1,119743 | 1,155543  | 0,996929  | 0,776987  | 0,359594  | 1,045438  | 0,660253  |
| ID3549612       |                       |                    | -0,276906 | -0,709561 | -1,151986 | -0,871447 | -0,781312 | -0,940930 | 1,014176  | 0,995331  | 0,938438  | 0,789621  | 0,769832  | 0,422150  |
| ID203683        | TXND5                 | ACL6A              | 0,082559  | -0,004359 | 0,368571  | -1,203443 | -1,234896 | -1,674754 | 0,492551  | 0,975845  | 0,997281  | 1,979858  | -0,230621 | -0,053625 |
| ID49585         |                       |                    | -0,467553 | -0,825675 | -0,802098 | -0,802419 | -1,501253 | -1,072547 | 0,960325  | 0,975171  | 1,205418  | 1,283909  | 0,936069  | 0,431630  |
| ID3762281       |                       |                    | 0,278271  | -0,516944 | -0,000305 | -0,099197 | -0,749779 | -1,357675 | 1,036391  | 0,946931  | 1,280323  | 0,759051  | -0,172156 | -1,215148 |
| ID1187          |                       |                    | -0,477885 | -1,065440 | -0,365943 | 0,236184  | -0,737791 | -0,703611 | 1,391486  | 0,906584  | 0,497698  | 0,370697  | -0,255652 | 0,296347  |
| ID3477702       | GELS                  |                    | 0,177167  | -0,576922 | -0,230421 | -1,208607 | -1,646608 | -1,396702 | 1,088631  | 0,900799  | 0,907946  | 1,086916  | 0,942049  | 0,227479  |
| ID17482         |                       |                    | 0,040060  | -0,874507 | -0,231494 | -1,969921 | -0,923549 | 0,913135  | 0,686311  | 0,889361  | 1,303638  | 0,241142  | 0,656939  | -0,670830 |
| ID717           |                       |                    | -0,264289 | -0,938518 | -0,278773 | -1,209997 | -1,569558 | -1,125475 | 0,995499  | 0,878662  | 0,822534  | 1,247301  | 1,068435  | 0,686003  |
| ID627           |                       |                    | -0,441274 | -1,069828 | -0,470449 | -0,745703 | -1,581884 | -0,844675 | 0,819740  | 0,870661  | 1,149115  | 1,150941  | 1,094202  | 0,356889  |
| ID722           | HS90A                 | MRE11, FETA        | 0,195126  | -0,540884 | -0,141222 | -1,275305 | -1,641662 | -1,479983 | 1,093288  | 0,862310  | 0,859510  | 1,108950  | 0,921582  | 0,315527  |
| ID1915149       |                       |                    | -0,294499 | -0,650827 | -0,039786 | -0,224859 | -1,271054 | -0,402454 | 1,247283  | 0,861979  | 1,284538  | -0,602528 | 0,341202  | -0,399626 |
| ID3432480       |                       |                    | -0,024743 | -0,199281 | -0,004439 | -0,582014 | -0,946338 | -1,444945 | -0,103087 | 0,860939  | 0,049926  | 1,606557  | 1,009379  | 0,179684  |
| ID866           |                       |                    | -0,198115 | -0,812088 | 0,497162  | -0,691901 | -0,906955 | -0,621828 | 1,003235  | 0,846430  | 1,459664  | -0,931718 | 0,018976  | 0,104208  |
| ID380472        | DCTN1                 |                    | -0,208175 | -0,946275 | -0,264976 | -0,772155 | -1,404563 | -1,689537 | 0,932503  | 0,842356  | 0,984073  | 1,076385  | 1,009982  | 0,709479  |
| ID2174          | CALR                  |                    | 0,051877  | 0,554703  | 0,059484  | -2,001405 | -1,497724 | -0,043838 | 0,391683  | 0,824401  | 1,116346  | 1,579877  | 0,085933  | -0,726367 |
| ID74132         | STML2                 | ACTG               | 0,242845  | 0,095946  | 1,044330  | -2,066225 | -0,383287 | -0,572654 | 0,732828  | 0,800799  | 0,964382  | 0,894673  | -0,578523 | -0,951446 |
| ID1119          |                       |                    | -0,566440 | -0,298743 | -0,156058 | -0,968145 | -1,047588 | -0,929875 | 1,038252  | 0,760737  | 1,231883  | 2,417327  | -0,210290 | -0,666731 |
| ID1814782       |                       |                    | 1,046915  | 0,010336  | -1,180253 | -0,871546 | -0,801523 | -0,973443 | 0,736028  | 0,721694  | 0,682649  | 0,351133  | 0,373470  | -0,007678 |
| ID22159         |                       |                    | -0,297366 | -0,571073 | -0,375830 | -1,084509 | -1,684081 | -1,203869 | 0,577578  | 0,715427  | 0,636425  | 1,392130  | 1,396348  | 0,846853  |
| ID406           | GRP75                 | PDIA4, HSP71       | -0,051827 | -0,997425 | -0,203662 | -0,221364 | -1,463288 | -1,140570 | 1,263562  | 0,640631  | 1,268625  | 0,599457  | 0,832866  | -0,377141 |
| ID715           |                       |                    | -0,002296 | -0,289550 | -0,150858 | -1,242506 | -1,913824 | -1,265196 | 0,922546  | 0,636680  | 0,474561  | 1,369334  | 0,926600  | 0,876843  |
| ID1841741       | RCN1                  |                    | 0,183485  | -0,434620 | 0,263366  | -0,707233 | -0,926939 | -2,148283 | 0,929072  | 0,623348  | 1,005159  | -0,038959 | 0,629717  | 0,816196  |
| ID1821608       |                       |                    | 0,264857  | 0,028092  | 0,237457  | 0,155629  | -1,860496 | -0,226301 | 0,770833  | 0,583121  | 0,569931  | 1,446366  | -1,093542 | -0,514356 |
| ID1843456       |                       |                    | -0,055463 | -0,382704 | -0,016922 | 0,783913  | -0,333169 | -2,393663 | 0,841167  | 0,576252  | 0,825643  | -0,338385 | 0,253906  | 0,206436  |
| ID2687300       |                       |                    | -0,551568 | -0,117402 | -0,458858 | -2,169156 | -1,175312 | 0,624434  | 0,465780  | 0,527705  | 0,997925  | 1,624825  | 0,222999  | 0,414834  |
| ID691           | MAOX                  | SWP70, PDIA3       | 0,142448  | -0,084226 | -0,360552 | -0,910077 | -1,615458 | -1,246145 | 0,850878  | 0,251823  | 0,278774  | -0,418714 | 1,500114  | 1,506458  |
| ID443           |                       |                    | 0,278178  | -0,538730 | 0,395021  | -1,990047 | -1,025715 | 1,374878  | -0,179205 | 0,163948  | 0,407496  | 0,599602  | 1,078897  | -0,414423 |
| ID1840030       | RCN1                  |                    | 0,208893  | -0,399138 | 0,308887  | -0,814702 | -0,855481 | -2,083886 | 0,578644  | 0,161827  | 0,781773  | 0,271008  | 0,405655  | 1,504272  |
| ID2662678       |                       |                    | -0,731202 | 0,570370  | -0,511123 | -1,686911 | -0,646888 | 0,140730  | 0,444615  | 0,058048  | 1,335605  | 2,136276  | -0,087487 | -0,487964 |
| ID401246        |                       |                    | 0,265826  | -0,035797 | 0,413791  | -0,610452 | -1,729785 | 0,038523  | 0,067969  | 0,017501  | 1,325156  | 1,271707  | 0,057863  | -0,764374 |
| ID693           |                       |                    | 0,084141  | 0,008373  | -0,284709 | -0,679870 | -2,143035 | -0,925571 | 0,734443  | -0,107078 | -0,012143 | 0,687190  | 1,374461  | 1,435597  |
| ID580           | CH60                  | HNRPK, ACTB, TBAK  | 0,075308  | 0,048952  | -0,845567 | -0,294356 | -0,508326 | -1,395892 | 0,549290  | -0,115742 | 0,877287  | 2,095180  | 0,154317  | -0,116657 |
| ID444662        |                       |                    | -0,177649 | -0,151608 | 0,077789  | -0,572239 | -0,742190 | -1,416680 | 0,018832  | -0,190586 | -0,036739 | 3,115427  | 0,249872  | 0,604628  |
| ID1683          |                       |                    | -0,887195 | -0,801006 | -0,502811 | -0,291966 | -0,405383 | -0,687885 | 1,187068  | -0,500318 | 1,100036  | 0,669786  | 0,953010  | 0,334108  |

Table S-4: cluster 2

| Cluster 2       |                       | Z-score <sup>13</sup> |           |           |           |           |           |           |           |           |          |           |           |
|-----------------|-----------------------|-----------------------|-----------|-----------|-----------|-----------|-----------|-----------|-----------|-----------|----------|-----------|-----------|
| ID <sup>1</sup> | Protein <sup>12</sup> | co_0 min              | co_30 min | co_60 min | co_24 h   | co_48 h   | co_72 h   | PI_0 min  | PI_30 min | PI_60 min | PI_24 h  | PI_48 h   | PI_72 h   |
| ID824           | PDIA1                 | -1,161790             | -0,796705 | -0,824941 | -0,680127 | -0,068859 | 0,352550  | 0,171206  | 0,254227  | 0,607868  | 3,122829 | 0,116008  | -0,311557 |
| ID431675        |                       | -0,867080             | -0,684028 | -1,165192 | -0,274875 | -0,642079 | -0,612647 | 0,624346  | 0,109390  | 0,643140  | 2,879720 | 0,469380  | 0,239853  |
| ID661           | GRP78                 | -1,093735             | -0,686442 | -0,400916 | -0,407371 | -0,769975 | -0,501842 | -0,406720 | 0,262389  | -0,124723 | 2,869278 | 0,941311  | 1,036065  |
| ID2111          | GLU2B                 | -1,057631             | -0,258775 | -1,030801 | 0,297765  | -0,827119 | 0,182188  | -0,211071 | -0,593630 | 0,641507  | 2,833903 | 0,319307  | 0,412833  |
| ID2239          | PDIA1                 | -1,330555             | -1,203592 | -1,005480 | -0,172862 | -0,109590 | 0,271340  | -0,018601 | -0,108087 | 0,113980  | 2,810114 | 0,796577  | 0,659285  |
| ID280677        | RCN1                  | -0,790352             | -0,420589 | -0,835915 | -1,464612 | -0,773972 | 0,785915  | -0,081255 | 0,765764  | 0,630455  | 2,591490 | 0,061658  | 0,179286  |
| ID7106          |                       | -0,760148             | -0,542449 | -0,695061 | -0,357462 | -0,302040 | 1,547827  | -0,672813 | -0,801212 | -0,517205 | 2,553799 | 0,722692  | 0,462522  |
| ID351055        |                       | -1,211569             | -0,782630 | -1,157768 | 0,555068  | 0,260266  | 1,316291  | 0,134575  | -0,630919 | -0,487013 | 2,518835 | 0,259034  | -0,144461 |
| ID982           | PDIA6                 | -1,610032             | -0,912071 | -1,046421 | -0,395639 | -0,187053 | 0,382693  | 0,419165  | 0,309059  | 1,039428  | 2,502389 | -0,139144 | 0,263221  |
| ID3760          | GRP78                 | -1,311318             | -0,897379 | -0,611853 | -0,246064 | -0,506827 | -0,169374 | -0,378203 | -0,052264 | -0,150377 | 2,418678 | 1,098909  | 1,410742  |
| ID92901         |                       | -1,586898             | -0,847773 | -0,815954 | 0,509914  | 0,821452  | 0,412517  | -0,521558 | -0,254713 | -0,424127 | 2,416390 | 0,380934  | 0,513912  |
| ID3485928       |                       | -1,387413             | -1,529101 | -1,146786 | 0,102861  | 0,021986  | 0,436940  | -0,045610 | 0,038244  | 0,074423  | 2,337018 | 0,868767  | 0,812925  |
| ID2740977       |                       | -1,156788             | -1,181089 | -0,595869 | 0,086536  | 0,034692  | 0,806955  | -0,466014 | -0,940152 | -0,185056 | 2,322394 | 0,947693  | 0,907295  |
| ID3616          |                       | -1,013204             | -1,094160 | -0,892029 | -0,795899 | -0,352828 | 0,229479  | 0,274320  | 1,232740  | 0,656862  | 2,219612 | 0,567206  | -0,477197 |
| ID864           | PDIA3                 | -1,263975             | -0,966387 | -0,959346 | 0,596354  | 0,581174  | 1,529880  | -0,116672 | -0,804632 | -0,433958 | 2,194944 | 0,186992  | 0,004364  |
| ID71445         |                       | -1,051772             | -0,471800 | -0,381339 | -0,388641 | -0,893719 | -0,552486 | -0,666859 | -0,026242 | 0,087178  | 2,178840 | 1,243960  | 1,467590  |
| ID2845794       | GRP78                 | -0,960223             | -1,524584 | -0,661458 | 0,179850  | 0,146642  | 0,626318  | -0,241127 | 1,244573  | -0,296148 | 2,128819 | 0,015416  | -0,125873 |
| ID827           | CH60                  | -1,391783             | -0,873379 | -1,005551 | -0,528177 | -0,558934 | -0,078398 | -0,160607 | -0,204127 | 1,380922  | 2,098363 | 1,039882  | 0,806378  |
| ID723           | HSP71                 | -1,656556             | -0,591632 | -0,901945 | 0,014589  | -0,048563 | 0,826486  | 1,072830  | -0,522149 | -0,286474 | 2,066098 | 0,783251  | -0,239410 |
| ID122740        | DP13B                 | -0,959009             | -0,676984 | -0,700237 | 0,634135  | 0,237716  | 0,882766  | -1,110150 | -0,858481 | -0,906139 | 2,047431 | 0,721924  | 1,198885  |
| ID787           | HNRPK                 | -1,431187             | -1,151964 | -1,044926 | 0,833210  | 0,042227  | -0,184375 | -0,580582 | 0,258516  | -0,272709 | 2,015931 | 1,427906  | 0,591937  |
| ID19644         | TTL12                 | -0,385210             | -1,081983 | -0,611818 | 0,699317  | -1,202986 | -0,924509 | -0,243158 | 0,727516  | 0,063300  | 1,810378 | 1,042129  | 0,559620  |
| ID535941        |                       | -0,212856             | 0,010225  | -0,262119 | -0,685589 | -0,113913 | 0,295547  | -0,865848 | -0,588931 | -0,477869 | 1,749561 | 1,040380  | 0,548804  |
| ID562964        |                       | -0,200793             | -0,524720 | -0,083709 | 0,229725  | -1,696112 | 0,747299  | -0,226086 | 0,485235  | 0,089847  | 1,684991 | 0,823113  | -0,907541 |
| ID2354041       |                       | -1,575757             | -0,974258 | -0,971856 | -0,136614 | 0,694364  | 1,067769  | -0,822643 | -0,133110 | -0,123400 | 1,682574 | 0,701724  | 1,011850  |
| ID444           |                       | -0,245657             | -0,831524 | 0,021779  | -0,940934 | -0,618847 | 1,014918  | -0,505556 | -0,248726 | -0,230168 | 1,677865 | 1,634769  | -0,308453 |
| ID86593         |                       | -1,532790             | -0,786303 | -0,961170 | 0,991277  | 0,087746  | 1,340766  | -0,645381 | -0,467515 | -0,274860 | 1,634500 | 0,702712  | 0,319643  |
| ID138687        |                       | -0,745369             | -1,401360 | -1,241053 | -0,088626 | 0,196350  | 1,757328  | -0,190907 | 0,753109  | -0,201407 | 1,625375 | 0,272516  | -0,329973 |
| ID694           | HSP7C                 | -1,386032             | -1,112147 | -1,025922 | 1,000932  | 0,529395  | 1,428604  | -0,089321 | -0,897003 | -0,743371 | 1,517293 | 0,681416  | 0,475480  |
| ID1345          | ANXA5                 | -1,568492             | -1,536176 | -0,842175 | -0,706978 | -0,349605 | 0,674438  | 0,793936  | 0,820254  | 0,858464  | 1,481328 | 0,602625  | 0,142714  |
| ID1761          |                       | -1,365537             | -1,084511 | -0,550999 | -0,408461 | -0,219512 | 1,704587  | -0,768430 | 1,255207  | -0,397632 | 1,463768 | 0,360471  | 0,376991  |
| ID672           | GRP78                 | -1,028770             | -1,582243 | -1,081194 | 0,636128  | 0,869090  | 0,958393  | 0,297801  | -0,120323 | -0,319624 | 1,431116 | 0,225970  | 0,071434  |
| ID826           | CH60                  | -1,361622             | -1,789609 | -0,894443 | -0,117941 | -0,410639 | 0,325896  | 0,807200  | 0,792463  | 1,329319  | 1,421914 | 0,397180  | -0,144238 |
| ID1251          | EF1D                  | -0,728700             | -0,007527 | -0,731919 | 1,560372  | 0,388047  | -0,697658 | 0,253067  | -0,659646 | -0,474413 | 1,411521 | -0,039818 | 0,079552  |
| ID603           | HS90A                 | -1,358367             | -0,788269 | -0,793262 | 0,698590  | 0,533437  | 1,286602  | -0,331946 | -0,924256 | -0,300552 | 1,404035 | 0,893054  | 0,031944  |
| ID596190        | HS90A                 | -1,136497             | -1,134501 | -0,462641 | 0,295115  | 0,382825  | 1,722841  | -0,599360 | -1,038911 | -0,758592 | 1,331710 | 0,764747  | 0,966192  |
| ID193389        |                       | -1,268006             | -0,697860 | -1,415414 | 0,218982  | 0,399461  | 1,188918  | 1,105989  | -0,541901 | 0,166707  | 1,302139 | 0,205767  | -0,339247 |
| ID3763695       |                       | -0,527880             | -0,360055 | -1,443300 | 0,253844  | -0,040967 | -0,911551 | 0,982306  | -0,538281 | 1,026812  | 1,300692 | 0,304329  | 0,279225  |
| ID1978481       |                       | -1,261859             | -0,682243 | -0,686154 | 0,617130  | 0,451055  | 0,915336  | -0,704101 | -0,860560 | -0,941085 | 1,299049 | 1,079029  | 1,099166  |
| ID1073          | ACTG                  | -1,544467             | -1,371092 | -1,140403 | 1,135285  | 0,720399  | 1,494302  | -0,108743 | -0,394912 | -0,384265 | 1,245362 | 0,284211  | 0,375665  |
| ID1055          | ACTG                  | -0,961770             | -0,880139 | -1,442083 | 1,406817  | -0,017124 | -0,478872 | -0,775300 | 0,503251  | 0,658512  | 1,244200 | 0,791213  | 0,262345  |
| ID883           |                       | -1,023766             | -1,370637 | -1,450093 | 0,873243  | 0,849663  | 1,300983  | -0,175368 | 0,548579  | 0,595069  | 1,203188 | -0,214858 | -0,835206 |
| ID556498        | KBP                   | -1,201483             | -1,166364 | -0,804632 | 0,804764  | 0,184603  | 2,126115  | -0,015303 | -0,855465 | -0,652650 | 1,190671 | 0,407193  | 0,280220  |
| ID897           | CALR                  | -0,818983             | -0,042810 | -0,919975 | -0,677454 | 0,551574  | 2,268502  | -0,914064 | -0,979204 | -0,266014 | 1,168947 | 0,243015  | 0,678703  |
| ID2889441       |                       | -1,708776             | -1,193289 | -1,590044 | -0,475705 | -0,088060 | 0,773387  | 0,490601  | 0,464275  | 0,507159  | 1,107100 | 0,655113  | 0,383604  |
| ID254557        |                       | -0,299959             | -0,955300 | -0,371440 | -1,039180 | -0,245505 | 1,179168  | -1,019478 | 0,973092  | 0,100823  | 1,099186 | 1,375461  | -0,522071 |
| ID450085        | PEPD                  | -0,997249             | -0,404108 | -1,139894 | 0,831381  | 0,099149  | 1,970825  | -0,284099 | -1,314470 | -0,528573 | 1,042384 | 0,825226  | 0,160023  |
| ID1082          |                       | -1,815328             | -1,300657 | -1,307281 | 0,836728  | 0,562234  | 0,983923  | 0,168217  | 0,017068  | -0,042560 | 1,040515 | 0,526914  | 0,590356  |
| ID2100931       |                       | 0,030507              | 0,106260  | 0,042688  | -2,115234 | -0,308876 | 0,399355  | -0,752084 | -0,174939 | -0,411384 | 0,992228 | 1,337187  | 0,752471  |
| ID66151         |                       | -0,955092             | -0,795814 | -0,425142 | 0,198198  | 0,831599  | -0,049029 | -0,721039 | -1,061703 | -0,803432 | 0,990201 | 1,315762  | 1,723042  |
| ID587           |                       | -1,344632             | -1,284523 | -1,494395 | 0,011168  | -0,718720 | 1,264715  | 0,494399  | 0,532480  | 1,050575  | 0,966024 | 0,110605  | 0,653807  |
| ID147614        |                       | -1,638300             | -1,025354 | -0,870252 | 0,584285  | 1,071039  | -0,091340 | -0,373168 | -0,412760 | 0,910190  | 0,612834 | 0,598908  |           |
| ID1795          |                       | -1,172989             | -1,060981 | -0,795935 | 0,379162  | 0,983747  | 1,455321  | -0,839151 | 0,198005  | -1,035132 | 0,872251 | 0,209697  | 1,024069  |
| ID808           | CPNE3                 | -1,468988             | -1,091227 | -0,757794 | 1,182430  | 0,664742  | 1,208280  | -0,480453 | -0,154130 | -0,122117 | 0,858416 | 0,662242  | -0,286795 |
| ID582           |                       | -0,975980             | -1,503693 | -1,264091 | -0,364986 | -0,945679 | 0,980028  | 0,758247  | 0,940483  | 1,272360  | 0,850982 | 0,111371  | 0,353704  |
| ID3091679       |                       | -1,540914             | -1,263534 | -0,836924 | 0,492773  | 0,367292  | 0,855301  | 0,207707  | 0,038457  | -0,080687 | 0,843745 | 0,483721  | 0,643999  |
| ID3062814       |                       | -0,590262             | -1,453695 | -0,238255 | 0,570846  | 1,162827  | 1,199203  | 0,076179  | 0,073142  | -0,232094 | 0,840238 | -0,373414 | -0,824655 |

Table S-4: cluster 2

| ID <sup>1</sup> | Protein <sup>12</sup> |               | co_0 min  | co_30 min | co_60 min | co_24 h   | co_48 h   | co_72 h   | PI_0 min  | PI_30 min | PI_60 min | PI_24 h   | PI_48 h   | PI_72 h   |
|-----------------|-----------------------|---------------|-----------|-----------|-----------|-----------|-----------|-----------|-----------|-----------|-----------|-----------|-----------|-----------|
| ID899           | K2C8                  | SET           | -1.639164 | -1.820062 | -1.331968 | 0.640234  | 0.620716  | 1.050564  | 0.301883  | -0.056275 | 0.244543  | 0.786410  | 0.712775  | 0.686945  |
| ID14770         | ACTG                  |               | -1.576538 | -1.072335 | -1.345141 | 1.330532  | 0.971400  | 1.393588  | -0.122559 | -0.581357 | 0.710452  | 0.254532  | 0.399865  |           |
| ID1846930       |                       |               | -1.692906 | -0.870808 | -0.935607 | -0.140787 | 0.881732  | 0.180376  | -0.704714 | 0.644484  | 0.736850  | 0.675950  | 0.669991  | 0.724425  |
| ID2649893       |                       |               | -0.702398 | -0.833545 | -0.913408 | 1.436382  | 0.465269  | 1.382214  | 0.215675  | 0.039998  | 0.624241  | 0.672210  | -1.024278 | -1.194308 |
| ID581           |                       | MLRM<br>PDIA4 | -0.650727 | -1.194296 | -0.305537 | -0.589529 | -1.372089 | 1.594932  | 0.277607  | 0.691159  | 1.096379  | 0.662723  | -0.145956 | 0.101014  |
| ID2037342       |                       |               | -1.102044 | -1.318839 | -0.590207 | 0.439899  | -0.267816 | 2.229526  | -0.421428 | -0.334166 | -0.108263 | 0.655714  | 0.211223  | 0.770328  |
| ID1706          | MRL                   |               | -1.785253 | -0.784614 | -0.920631 | 0.929147  | 0.177835  | 0.905596  | 1.445279  | 0.124838  | 0.639651  | 0.581859  | -0.486112 | -0.682130 |
| ID120878        | GRP78                 |               | -1.043505 | -0.818182 | -1.186487 | 1.032561  | 0.538694  | 1.380507  | 0.737286  | -0.825670 | -0.309414 | 0.547104  | 0.276060  | -0.192178 |
| ID185058        |                       |               | -1.341989 | -0.868082 | -1.077716 | 0.371356  | 0.674788  | 1.407457  | 1.408696  | -0.258370 | 0.070141  | 0.534494  | 0.006070  | -0.793221 |
| ID3761695       |                       |               | -1.918702 | -0.586808 | -1.012507 | 0.800462  | 0.186424  | 0.881069  | 0.031691  | -0.069857 | 0.426408  | 0.529453  | 0.526326  | 0.338403  |
| ID288865        |                       |               | -0.773357 | -0.570625 | -1.333615 | 0.169610  | 0.497711  | 0.339728  | -0.599239 | 1.047820  | -0.606036 | 0.525785  | 0.449044  | 0.984621  |
| ID2035512       |                       |               | -0.573416 | -0.925991 | -0.115988 | 0.649323  | -0.373023 | 2.039989  | -1.103695 | -0.392075 | -0.593860 | 0.495686  | 0.247937  | 0.769034  |
| ID1302          |                       | ENPL          | -0.887439 | -0.853709 | 0.393435  | 0.485349  | 0.476892  | 0.477717  | -0.228826 | -0.909379 | -0.239198 | 0.445533  | 0.402989  | 0.401765  |
| ID132924        |                       |               | -1.366272 | -0.722936 | -1.720218 | 1.155855  | 0.912111  | 1.114700  | 0.338603  | -0.742321 | 0.634700  | 0.442028  | 0.045059  | 0.019198  |
| ID1542          |                       |               | -0.359063 | -1.686299 | -1.005629 | 0.477161  | 0.480971  | 0.488070  | -0.313748 | 0.325497  | 0.382522  | 0.438867  | 0.442599  | 0.438768  |
| ID720           | HSP71                 |               | -1.060705 | -1.100765 | -1.159064 | 1.154054  | 1.435559  | -0.166077 | 0.582735  | -0.487028 | -0.673562 | 0.389316  | 0.979281  | 0.203585  |
| ID2138752       |                       |               | -1.555446 | 0.138243  | -0.073490 | 0.197309  | 0.175986  | 0.175743  | 0.180400  | -0.017771 | 0.113705  | 0.346571  | 0.206249  | 0.199143  |
| ID1615          |                       |               | 0.373764  | -0.326070 | -1.090171 | 0.430524  | 0.436081  | 0.406641  | 0.353673  | 0.323463  | -0.353945 | 0.344617  | -1.126638 | 0.314216  |
| ID2099065       |                       |               | -0.746912 | -0.731410 | -0.704250 | 1.659517  | 0.397080  | -0.118620 | -1.373243 | 0.247759  | -0.874119 | 0.317808  | 1.521044  | 0.484797  |
| ID2330          |                       |               | -1.113903 | -1.282002 | -1.236868 | 0.336930  | -0.289009 | 0.416569  | 0.536373  | 0.626935  | 0.306049  | 0.281311  | 0.347788  | 1.140155  |
| ID1094          |                       | MARCS         | -1.042086 | -1.429392 | 0.198087  | 0.247377  | 0.241969  | 0.279985  | 0.166999  | 0.173649  | 0.163207  | 0.255744  | 0.218016  | 0.233032  |
| ID2202941       |                       |               | 0.200272  | -0.773973 | -1.777507 | 0.271871  | 0.258268  | 0.264154  | 0.290813  | 0.287705  | 0.289400  | 0.254586  | 0.261975  | 0.236083  |
| ID429069        |                       |               | 0.081483  | 0.095424  | -1.611401 | 0.253833  | 0.239612  | 0.238645  | 0.063400  | 0.002217  | -0.011336 | 0.254453  | 0.230732  | 0.226551  |
| ID12822         |                       |               | -0.955310 | -1.156825 | -1.415286 | 1.315552  | 0.764028  | 0.454097  | -0.714590 | 0.076885  | -0.521077 | 0.237837  | 0.893959  | 1.080190  |
| ID44539         |                       | TADBP         | -0.697584 | -1.302411 | -0.733598 | -0.397560 | -0.388969 | 0.879899  | 0.623400  | 0.638233  | 0.864900  | 0.210463  | -0.792258 | 1.148101  |
| ID3329884       | ARP3                  |               | -0.036091 | 0.070904  | -1.571724 | 0.146288  | 0.133651  | 0.139501  | 0.248326  | 0.216035  | 0.206550  | 0.175334  | 0.160755  | 0.154304  |
| ID15904         | TBAK                  |               | -1.119401 | -0.529518 | -0.731832 | 0.214373  | 1.075835  | 1.814919  | 0.724164  | 0.721931  | -1.106329 | 0.107307  | -0.427319 | -0.717303 |
| ID2148299       |                       |               | -0.705510 | -0.718430 | -0.803080 | 0.419588  | -0.810060 | 1.015437  | 0.895312  | 0.488464  | 0.918363  | 0.077274  | -0.014335 | -0.743705 |
| ID3413662       |                       |               | -1.448990 | -1.046274 | -0.385931 | 0.025170  | 0.362648  | 1.950327  | 0.628458  | 0.754148  | -0.003450 | 0.052116  | -0.174044 | -0.701150 |
| ID140457        |                       |               | -1.014657 | -1.719992 | -0.450693 | 0.479557  | 0.422352  | 0.182419  | 0.877896  | 0.616677  | 0.506228  | 0.031572  | 0.137580  | -0.061046 |
| ID200032        |                       |               | -1.135615 | -0.545042 | -0.354957 | -0.243067 | 1.060627  | 1.584078  | -0.132111 | -0.427466 | 1.168753  | 0.016540  | -0.021710 | -0.965894 |
| ID892           | K2C8                  |               | -1.721537 | -1.376848 | -1.224211 | 0.164619  | 0.478974  | 1.443342  | 1.064572  | 0.799248  | 0.809924  | 0.002316  | -0.177976 | -0.261844 |
| ID1650          |                       |               | -0.695441 | -0.050353 | -0.743204 | 0.190993  | 0.831996  | 1.259641  | -1.642407 | 1.868930  | -0.989171 | -0.004776 | 0.257422  | -0.284823 |
| ID47508         |                       |               | -1.553781 | -0.978508 | -1.194148 | 1.537183  | 1.366449  | 1.296520  | 0.264453  | -0.392386 | -0.293600 | -0.059996 | 0.007781  | -0.014965 |
| ID129069        |                       |               | -0.850040 | -1.242357 | -0.537493 | 0.727637  | 1.137500  | 2.073128  | 0.286106  | -0.093094 | -0.447807 | -0.064382 | -0.303662 | -0.701631 |
| ID235608        | COR1B                 |               | -0.946221 | -1.458733 | -1.213801 | -0.299966 | 0.415698  | 1.672449  | 1.070008  | 0.309385  | 0.010340  | -0.176783 | 1.067416  | -0.493988 |
| ID61022         |                       |               | -1.689689 | -0.689682 | -1.397576 | 0.730709  | 0.272599  | -0.104232 | 0.014549  | -0.072171 | 0.950541  | -0.200909 | 1.139637  | 0.996000  |
| ID3163353       |                       |               | -1.366256 | -1.298710 | -0.953662 | 0.351644  | 1.226882  | 1.627397  | 1.357889  | -0.484317 | -0.190759 | -0.263805 | -0.015292 | -0.056961 |
| ID1989367       |                       |               | -0.759511 | -1.155698 | -0.756396 | -1.565540 | 0.672419  | 0.066960  | 0.250891  | 0.476378  | 0.570167  | -0.290071 | 0.596173  | 1.821711  |
| ID17545         | MX1                   |               | -0.031203 | -1.034900 | -0.354199 | -1.506540 | -0.269046 | 2.001076  | 0.051539  | 0.962335  | 0.452063  | -0.319063 | 0.883022  | -0.914850 |
| ID3763473       |                       |               | -1.194950 | -1.465314 | -0.960445 | 0.250267  | 0.384297  | 0.469019  | -0.117763 | 1.666427  | 0.607293  | -0.336332 | 0.766767  | -0.153351 |
| ID595           |                       |               | -0.565275 | -0.526821 | -0.378324 | 0.376141  | 0.567469  | -0.395053 | -0.818103 | -0.627062 | -0.431626 | -0.336437 | 2.470522  | 0.580460  |
| ID1490          |                       |               | -0.649155 | -0.612302 | -0.184487 | 0.191021  | 0.681107  | -0.373250 | -0.951835 | 0.711670  | -0.627256 | -0.356757 | 0.915609  | 1.166445  |
| ID1933424       |                       |               | -0.704930 | -0.566660 | -0.833043 | -0.432968 | 1.061739  | 0.737056  | -0.496084 | -0.820521 | -0.657916 | -0.402344 | 0.566802  | 2.448285  |
| ID1935188       |                       |               | -0.872011 | -0.389031 | -0.339018 | -0.772963 | 0.991361  | 0.131530  | -0.327699 | -0.615229 | -0.296869 | -0.453541 | 0.437768  | 2.392316  |
| ID3762592       |                       |               | -1.676157 | -1.344182 | -1.095019 | -0.055962 | 0.383433  | 1.350788  | 1.415935  | 0.832841  | 0.387234  | -0.500835 | -0.179754 | 0.356469  |
| ID121837        |                       |               | -0.533516 | 0.204156  | -0.800621 | 0.778830  | -0.657176 | 1.135144  | -0.097699 | -0.330304 | 0.804694  | -0.536949 | 0.194167  | -0.294962 |
| ID1654          |                       |               | -0.972929 | -0.923826 | -0.907657 | 1.231698  | 1.261294  | 1.148175  | -0.229092 | -0.304762 | -0.127055 | -0.673291 | 0.235884  | 0.093237  |
| ID483852        |                       |               | -0.444549 | -1.124195 | -1.035568 | 0.534399  | -0.600689 | 0.300432  | -0.336264 | 0.590853  | -0.400269 | -0.677095 | 2.250869  | 0.772804  |
| ID1994828       |                       |               | -0.578754 | -0.472995 | -0.318739 | 0.241603  | -0.178965 | -0.221664 | -0.163340 | -0.137750 | 0.000608  | -0.885289 | 0.194559  | 3.260432  |
| ID290046        |                       |               | -1.072439 | -0.070946 | -1.037173 | 0.609524  | 0.184578  | 1.880625  | 1.096086  | -0.459540 | -0.771907 | -1.357735 | 0.833971  | -0.174477 |

Table S-4: cluster 3

| Cluster 3       |                       | Z-score <sup>13</sup>                 |           |           |           |           |           |           |           |           |           |           |           |
|-----------------|-----------------------|---------------------------------------|-----------|-----------|-----------|-----------|-----------|-----------|-----------|-----------|-----------|-----------|-----------|
| ID <sup>1</sup> | Protein <sup>12</sup> | co_0 min                              | co_30 min | co_60 min | co_24 h   | co_48 h   | co_72 h   | PI_0 min  | PI_30 min | PI_60 min | PI_24 h   | PI_48 h   | PI_72 h   |
| ID376           | HYOU1                 | -0.682113                             | -0.114028 | -0.238009 | -0.583871 | -0.454718 | 0.629152  | -0.395685 | -0.385885 | 0.048431  | 3.497170  | -0.030543 | -0.415609 |
| ID482337        |                       | -0.419584                             | -0.330757 | -0.433454 | 0.374246  | 0.138109  | 0.442937  | -0.611321 | -0.816345 | -0.664648 | 3.394501  | -0.141428 | -0.083631 |
| ID211213        |                       | -0.740160                             | -0.489291 | -0.482426 | 0.109191  | 0.285855  | 0.029006  | -0.872581 | -0.437135 | -0.567158 | 3.249910  | 0.362945  | 0.364321  |
| ID3737          | ATPB                  | -0.027307                             | 0.586098  | -0.171628 | -0.256554 | -0.235577 | -0.002926 | -0.974208 | -0.921806 | 0.021032  | 3.205411  | -0.114563 | -0.306620 |
| ID658           | GRP78                 | -0.564444                             | -0.630420 | -0.423998 | 0.303187  | 0.231778  | -0.642790 | 0.368837  | -0.070073 | -0.102734 | 3.202358  | -0.332415 | -0.538697 |
| ID2522          |                       | -0.442667                             | 0.123526  | 0.204894  | 0.415185  | 0.183491  | -0.254611 | -1.000001 | -1.233507 | -0.427327 | 3.181302  | 0.223829  | -0.178789 |
| ID594301        |                       | -0.383024                             | 0.258418  | -0.365593 | 0.546862  | 0.138334  | -0.146502 | -0.620406 | -1.502312 | -0.697192 | 3.023984  | 0.122799  | 0.380628  |
| ID673           | SYG                   | 0.041329                              | 0.217918  | 0.122692  | 0.416898  | 0.370466  | 0.526268  | -1.259262 | -1.069098 | -1.088482 | 2.942558  | -0.427790 | -0.057857 |
| ID854           | PDIA3                 | HNRPF, VATB2                          | -1.146338 | -0.565011 | -0.993779 | -0.315253 | 0.085405  | 1.206453  | 0.278475  | -0.287360 | 0.471103  | 2.903679  | -0.346206 |
| ID325           |                       |                                       | -0.124958 | 0.439594  | -0.302873 | 0.662178  | 0.235357  | -0.120455 | -0.239682 | -1.733035 | -0.110051 | 2.847197  | -0.174685 |
| ID9421          | SF3B2                 |                                       | 0.074335  | -0.277232 | 0.031493  | -1.010045 | 0.137133  | 1.163784  | -1.107459 | -0.161003 | -0.345590 | 2.788676  | -0.070558 |
| ID1433          | PSME1                 | 6PGL, ERP29                           | 0.229130  | 0.884715  | 0.706377  | -0.627165 | -0.752765 | 0.347797  | -0.410589 | -0.124819 | 0.085167  | 2.777781  | -1.095060 |
| ID274688        | ENPL                  |                                       | -0.609945 | -0.328620 | -0.545800 | -0.347265 | -0.880492 | 0.183231  | 0.164287  | 1.095042  | 0.485802  | 2.770275  | -0.501398 |
| ID3762278       |                       |                                       | -0.460783 | 0.008776  | 0.354719  | 0.310103  | -0.273256 | 0.820839  | -0.304505 | 0.235230  | -1.361092 | 2.677408  | -0.219096 |
| ID1037          | CALU                  | ACTG                                  | -0.605903 | 1.083832  | -0.596194 | -0.561682 | 0.146655  | 0.263655  | 0.143425  | -1.384669 | 0.842091  | 2.635858  | -0.822712 |
| ID10509         | LG3BP                 |                                       | -0.424498 | 0.322287  | -0.464287 | -0.686155 | -0.346705 | 0.337241  | -0.736289 | -0.830920 | -0.519959 | 2.598696  | 1.009928  |
| ID6678          |                       |                                       | -0.156348 | 0.312952  | -0.435789 | 0.877398  | 0.769139  | 0.551810  | -0.809275 | -1.577511 | -0.521227 | 2.563620  | -0.274106 |
| ID543455        |                       |                                       | 0.258511  | 0.134841  | 0.259410  | -0.082826 | 0.836027  | 0.976028  | -0.971619 | -0.938610 | -0.769597 | 2.562312  | -0.303681 |
| ID625           | EZRI                  | CALD1, SYK<br>1433E                   | -0.232128 | 0.024604  | -0.017983 | 0.751288  | 0.447759  | 0.625510  | -1.047103 | -1.241922 | -0.876201 | 2.559498  | -0.265988 |
| ID1373          | PSME2                 |                                       | 0.067351  | 0.283399  | 0.532166  | -0.625861 | -0.242545 | 0.188856  | 0.234268  | 0.097358  | 0.740930  | 2.539775  | -1.587447 |
| ID16921         |                       |                                       | 0.225392  | 0.642914  | 0.737566  | 1.111596  | 0.050964  | -0.408335 | -0.423229 | -1.192696 | -0.854766 | 2.462580  | -0.458355 |
| ID2680471       | RCN1                  | SPRC                                  | -0.336860 | 0.499883  | -0.313602 | -1.025741 | -0.702289 | 1.113358  | -0.100760 | 0.499930  | 0.632701  | 2.406988  | -1.247664 |
| ID9232          |                       |                                       | 0.463691  | 0.407091  | 0.494715  | 0.167891  | 0.852477  | 0.222905  | -0.571095 | -1.216602 | -1.002047 | 2.394110  | -0.294149 |
| ID710           | HSP7C                 |                                       | -1.206980 | 0.098621  | -0.712948 | 0.392157  | -0.503313 | 1.322294  | 0.395700  | -0.568009 | -0.654031 | 2.366497  | 0.025645  |
| ID989           | KAP0                  | TXND5                                 | 0.156964  | 0.971065  | 0.493017  | 0.223557  | 0.371018  | 0.637389  | -1.083921 | -1.058284 | -0.765794 | 2.332085  | -0.830002 |
| ID364           | HYOU1                 |                                       | 0.218409  | 1.002231  | 0.624823  | -0.265214 | -0.162868 | 0.200642  | -0.608399 | 0.122354  | 0.243270  | 2.291821  | -1.367719 |
| ID546917        |                       |                                       | -0.202314 | -0.879010 | -0.199240 | -0.635668 | -0.104010 | 1.529247  | -0.497803 | 0.594050  | -0.715729 | 2.245539  | 0.171430  |
| ID195754        | ITA3                  | CALD1                                 | 0.178838  | 0.293174  | 0.184257  | 0.203251  | 1.108849  | 1.035137  | -0.700117 | -0.997203 | 0.866071  | 2.225893  | -0.698966 |
| ID6662          |                       |                                       | 0.080096  | 0.534060  | -0.262500 | 0.940893  | 0.900834  | 0.757582  | -0.897459 | -1.444066 | -0.597248 | 2.211151  | -0.748809 |
| ID28319         | SYG                   |                                       | -0.213971 | -0.108382 | -0.131719 | 0.531568  | 0.324053  | 0.237766  | -0.702746 | -0.319635 | -0.697397 | 2.182322  | -0.524700 |
| ID462           | ENPL                  | PLOD3                                 | 0.949723  | 0.451476  | -0.160949 | -0.595258 | 1.281255  | -0.106039 | 0.092282  | -0.478279 | -0.628495 | 2.157434  | -0.199950 |
| ID25674         |                       |                                       | -0.251668 | 0.070381  | 0.128612  | -0.567083 | -0.379814 | 1.146307  | 0.627350  | -0.352126 | 0.747311  | 2.135513  | -1.687486 |
| ID1663          |                       |                                       | -0.216159 | 0.282781  | -0.483227 | 1.443308  | -0.863583 | -0.321289 | -0.998974 | -0.260015 | 2.031071  | 0.325437  | -1.485404 |
| ID1024          | CALU                  | ITA3                                  | -0.713702 | 0.509780  | -0.696541 | -0.226636 | 0.144047  | 2.058213  | -0.196383 | -0.910921 | 0.180561  | 1.994297  | -1.302917 |
| ID420           | ACTG                  |                                       | 0.138769  | 0.538739  | 0.343606  | 0.270551  | 0.740577  | 1.255038  | -0.336923 | -1.293077 | -0.868212 | 1.944290  | -1.008574 |
| ID408           | ITA3                  |                                       | 0.437265  | 0.486019  | 0.497623  | 0.635990  | 1.053072  | 0.360301  | -0.481326 | -1.164128 | -0.974419 | 1.890399  | -0.643678 |
| ID1664          |                       |                                       | -0.525747 | -0.237101 | 0.204760  | 0.663364  | 0.762732  | 1.373549  | -0.970092 | -0.907564 | -0.241614 | 1.846967  | -0.597489 |
| ID810           | PEPD                  | PDIA3, TBA1B<br>PDIA6, TXND4<br>ANXA2 | 0.238360  | 0.370833  | -0.828117 | -0.007325 | 1.431192  | -0.018746 | 0.709991  | -0.257206 | -0.591259 | 1.788388  | -1.011201 |
| ID957           | F10A1                 |                                       | 0.144175  | 1.036939  | 0.746499  | -0.461128 | -0.319110 | 0.005697  | 0.165403  | 0.427001  | 0.471596  | 1.775326  | -1.718343 |
| ID1254          | NACA                  |                                       | 0.400186  | 1.300202  | 0.484183  | 0.889057  | -0.057438 | -1.410777 | -0.322670 | -1.592954 | -0.582199 | 1.774048  | -0.198149 |
| ID55507         | RCN1                  | ACTG                                  | -0.896373 | -0.020777 | -0.920388 | 0.181019  | -0.059914 | 1.362277  | 0.364065  | 0.122933  | 1.126109  | 1.716327  | -1.216923 |
| ID53317         | CALU                  |                                       | -0.780621 | 0.101411  | -0.652700 | -0.271944 | 0.214550  | 2.464816  | -0.327865 | -0.503355 | -0.068515 | 1.681824  | -0.960976 |
| ID1027          | CALU                  |                                       | -0.366867 | 0.609675  | -0.247683 | -1.168935 | -0.096374 | 2.225364  | -0.218290 | -0.207183 | 0.263221  | 1.623115  | -1.376977 |
| ID2068580       |                       | ACTG, PRS6B                           | -0.386167 | -0.059346 | -0.409364 | 0.952249  | 0.352731  | 0.755615  | -0.050502 | -0.318303 | -0.375446 | 1.586584  | -0.022299 |
| ID1033          | TXND4                 |                                       | -0.811263 | 0.276063  | -0.071626 | 0.745945  | 1.460095  | 1.152232  | -0.927162 | -0.425152 | -0.021793 | 1.535083  | -1.379293 |
| ID820           | PDIA1                 |                                       | -0.607052 | 0.006046  | -0.437879 | 0.155420  | 1.423498  | 0.327571  | 0.579819  | 0.001206  | 0.303952  | 1.504562  | -0.726622 |
| ID535           | GLU2B                 | IMMT, HS90B                           | 0.208543  | 1.074909  | 0.505648  | -0.594850 | -0.218291 | 0.147332  | 0.294853  | 0.071808  | 0.916847  | 1.474619  | -1.438110 |
| ID3761685       |                       |                                       | -0.548277 | -0.309705 | -0.551336 | 0.630440  | 0.484069  | 0.314284  | 0.262042  | -1.779732 | 0.355422  | 1.472331  | 0.418896  |
| ID630           | PLOD3                 |                                       | -0.043995 | 0.410675  | 0.513233  | 0.377940  | 0.339566  | -0.121865 | 0.849853  | -0.808284 | 0.942295  | 1.420047  | -1.647883 |
| ID52561         |                       | SPRC                                  | -0.435668 | 0.526804  | -0.512306 | 0.039518  | 0.101261  | 2.112906  | -0.156124 | -0.531725 | 0.590134  | 1.390282  | -1.579804 |
| ID1127          | RCN1                  |                                       | 0.104889  | 0.549787  | 0.233922  | 0.028587  | 0.361906  | 1.427530  | -0.631093 | 0.528165  | -0.020532 | 1.328291  | -1.667166 |
| ID925           | CALR                  |                                       | -0.066553 | 1.271407  | -0.193812 | -0.726807 | 0.090306  | 1.707569  | -0.874675 | -0.346420 | 0.318216  | 1.238183  | -1.529230 |
| ID963           |                       | CPNE1                                 | -0.966740 | 0.136444  | -1.051399 | -0.441740 | 0.731128  | 2.421832  | -0.411089 | -0.749825 | -0.016670 | 1.190659  | -0.630284 |
| ID54018         | CALU                  |                                       | -0.511462 | 0.255737  | -0.523592 | 0.211335  | 0.436950  | 2.119378  | -0.109281 | -0.215019 | 0.437185  | 1.182499  | -1.524161 |
| ID812           | P4HA2                 |                                       | -0.645828 | 0.183679  | -0.192183 | 1.740522  | 1.032006  | 0.906088  | -0.766040 | -0.712982 | 0.044299  | 1.130430  | -1.192623 |
| ID18275         | GRP75                 | PDIA4                                 | 0.210159  | 0.622982  | -0.363906 | -0.118721 | 1.210361  | 0.465701  | -0.089405 | -1.205226 | -0.792373 | 1.126603  | -0.343207 |
| ID1061          | RCN1                  | ACTG                                  | 0.262210  | 1.495974  | 0.438542  | -0.466201 | 0.121604  | -0.052866 | 0.005366  | -0.330013 | 1.099348  | 1.085655  | -1.648423 |

Table S-4: cluster 3

| ID <sup>1</sup> | Protein <sup>12</sup> | co_0 min  | co_30 min | co_60 min | co_24 h   | co_48 h   | co_72 h   | PI_0 min  | PI_30 min | PI_60 min | PI_24 h  | PI_48 h   | PI_72 h   |
|-----------------|-----------------------|-----------|-----------|-----------|-----------|-----------|-----------|-----------|-----------|-----------|----------|-----------|-----------|
| ID16614         | GRP78<br>SPRC         | 0,651043  | 0,914792  | 1,282376  | -0,187392 | -0,629512 | 0,675663  | -1,050405 | -1,493375 | 0,491329  | 1,079539 | -0,277278 | -1,186895 |
| ID10719         |                       | -0,448500 | 0,373683  | -0,386014 | -0,528403 | 0,452391  | -0,646824 | 0,810364  | -2,089344 | 1,637155  | 0,985292 | 0,208655  | -0,122132 |
| ID278067        |                       | -0,044829 | 0,717364  | -0,390960 | 0,639890  | 0,502577  | 1,286908  | -0,070908 | -1,093669 | 0,924987  | 0,945366 | -1,550788 | -1,629598 |
| ID574883        |                       | -0,720039 | -0,417199 | -0,190551 | 1,540755  | 0,307235  | 0,598262  | -0,378390 | -0,457386 | 1,073101  | 0,943373 | -1,708600 | -0,354719 |
| ID2350362       |                       | -0,470983 | 0,184551  | -0,316627 | -0,382250 | 0,450873  | 2,828357  | -0,629224 | -0,336791 | -0,482908 | 0,620806 | -1,077996 | -0,232606 |
| ID2352301       |                       | -0,411922 | 0,813246  | -0,009026 | -0,202669 | 0,579633  | 2,357463  | -0,591028 | 0,009074  | -0,824739 | 0,587007 | -1,334022 | -0,826265 |

Table S-4: cluster 4

| Cluster 4       |                       | Z-score <sup>13</sup> |           |           |           |           |           |           |           |           |           |           |           |           |
|-----------------|-----------------------|-----------------------|-----------|-----------|-----------|-----------|-----------|-----------|-----------|-----------|-----------|-----------|-----------|-----------|
| ID <sup>1</sup> | Protein <sup>12</sup> |                       | co_0 min  | co_30 min | co_60 min | co_24 h   | co_48 h   | co_72 h   | PI_0 min  | PI_30 min | PI_60 min | PI_24 h   | PI_48 h   | PI_72 h   |
| ID589630        |                       |                       | 0,146398  | 0,147199  | 0,145347  | 0,178095  | 0,178232  | 0,182979  | 0,128322  | 0,112356  | 0,130739  | -6,557567 | 0,145394  | 0,144332  |
| ID1298          |                       |                       | 0,029488  | 0,184245  | 0,231592  | 0,712976  | 0,780460  | 0,536694  | -0,055250 | -0,443824 | -0,054792 | -5,923574 | -0,167049 | -0,273643 |
| ID36428         | U2AF2                 | IMMT                  | 0,205332  | 0,206978  | 0,207511  | 0,213912  | 0,209873  | 0,224758  | 0,210476  | 0,213517  | 0,209125  | -4,639083 | 0,211578  | 0,206482  |
| ID624           | CALD1                 |                       | 0,209230  | 0,210980  | 0,209903  | 0,220025  | 0,219612  | 0,223345  | 0,209796  | 0,196862  | 0,209167  | -4,639024 | 0,203826  | 0,206765  |
| ID855           |                       |                       | 0,236048  | 0,364620  | 0,436508  | 0,420355  | 0,267114  | 0,193618  | -0,079260 | -0,138733 | 0,173160  | -3,882646 | -0,044152 | 0,112044  |
| ID811           | U2AF2                 |                       | 0,255227  | 0,254841  | 0,256009  | 0,265266  | 0,259466  | 0,259823  | 0,256014  | 0,262834  | 0,258668  | -3,788726 | 0,255616  | 0,257781  |
| ID1393          | GSTO1                 |                       | 0,260320  | 0,266571  | 0,264575  | 0,261984  | 0,263463  | 0,263348  | 0,243678  | 0,254362  | 0,253259  | -3,788671 | 0,253021  | 0,256921  |
| ID1592          |                       |                       | 0,253209  | 0,269993  | 0,252175  | 0,269675  | 0,261590  | 0,273783  | 0,244089  | 0,253621  | 0,258015  | -3,788588 | 0,254022  | 0,251267  |
| ID511           |                       |                       | 0,265909  | 0,266521  | 0,269258  | 0,267551  | 0,272991  | 0,273838  | 0,251753  | 0,239276  | 0,248254  | -3,788452 | 0,243141  | 0,242848  |
| ID27152         |                       |                       | 0,267803  | 0,268113  | 0,277163  | 0,254323  | 0,266104  | 0,272255  | 0,259840  | 0,242921  | 0,256071  | -3,788427 | 0,240710  | 0,236017  |
| ID401           |                       |                       | 0,262490  | 0,267909  | 0,265444  | 0,275722  | 0,276667  | 0,275863  | 0,246656  | 0,238522  | 0,233044  | -3,788337 | 0,249081  | 0,249857  |
| ID402           |                       |                       | 0,264500  | 0,268533  | 0,265294  | 0,276617  | 0,276993  | 0,275745  | 0,243657  | 0,235261  | 0,236292  | -3,788313 | 0,248629  | 0,249715  |
| ID361           |                       | CTNA1                 | 0,263905  | 0,267887  | 0,271537  | 0,273391  | 0,272495  | 0,273674  | 0,252098  | 0,241612  | 0,239646  | -3,788294 | 0,241404  | 0,243571  |
| ID403           |                       |                       | 0,266860  | 0,271247  | 0,266987  | 0,277953  | 0,277738  | 0,275291  | 0,242510  | 0,234160  | 0,230679  | -3,788199 | 0,247061  | 0,248663  |
| ID466049        |                       |                       | 0,258538  | 0,264690  | 0,264283  | 0,279075  | 0,281256  | 0,286472  | 0,251026  | 0,237314  | 0,227940  | -3,788129 | 0,244771  | 0,245732  |
| ID26959         |                       |                       | 0,262092  | 0,266840  | 0,272124  | 0,286441  | 0,281429  | 0,283669  | 0,240012  | 0,236131  | 0,233130  | -3,787972 | 0,233155  | 0,245955  |
| ID377           |                       |                       | 0,265790  | 0,273005  | 0,273750  | 0,285077  | 0,287246  | 0,287848  | 0,234875  | 0,238372  | 0,218699  | -3,787262 | 0,241310  | 0,234475  |
| ID1443          | PNPO                  |                       | 0,300777  | 0,414699  | 0,349929  | 0,482065  | 0,381834  | 0,402358  | -0,348154 | -0,107122 | 0,014522  | -3,755445 | -0,035048 | 0,021863  |
| ID2288948       |                       |                       | 0,300081  | 0,298500  | 0,307637  | 0,255486  | 0,274882  | 0,268417  | 0,302110  | 0,249361  | 0,298584  | -3,557192 | 0,234247  | -1,712987 |
| ID1146          | RFC2                  |                       | 0,168273  | 0,174705  | 0,177609  | 0,171225  | 0,169122  | 0,175166  | 0,137355  | 0,123428  | 0,140251  | -3,460720 | 0,151030  | 0,142196  |
| ID1032          | PA2G4                 | SAHH, ILEU            | 0,172181  | 0,174101  | 0,174056  | 0,182649  | 0,181433  | 0,177317  | 0,120523  | 0,118398  | 0,133602  | -3,458275 | 0,142693  | 0,152186  |
| ID2275539       |                       | HNRH1, PTN1, BLMH     | 0,160206  | 0,165738  | 0,167740  | 0,186188  | 0,175445  | 0,177005  | 0,126210  | 0,125128  | 0,147705  | -3,447567 | 0,154146  | 0,138273  |
| ID934           | SYDC                  |                       | 0,159201  | 0,167763  | 0,164251  | 0,166117  | 0,164437  | 0,171902  | 0,141399  | 0,134832  | 0,135755  | -3,359335 | 0,133240  | 0,140770  |
| ID1692          |                       |                       | 0,150451  | 0,154532  | 0,152227  | 0,167587  | 0,167541  | 0,164071  | 0,131420  | 0,129508  | 0,138181  | -3,310519 | 0,147698  | 0,152043  |
| ID894           | AL1B1                 |                       | 0,143955  | 0,149752  | 0,150494  | 0,168910  | 0,162412  | 0,163592  | 0,132772  | 0,122413  | 0,138274  | -3,287451 | 0,153314  | 0,157839  |
| ID1087          | GALK1                 |                       | 0,148970  | 0,155982  | 0,153691  | 0,148456  | 0,145207  | 0,148211  | 0,152191  | 0,150074  | 0,154391  | -3,269274 | 0,140168  | 0,137295  |
| ID1352          | ECH1                  |                       | 0,148522  | 0,151510  | 0,153397  | 0,142229  | 0,152181  | 0,161475  | 0,153190  | 0,150384  | 0,155323  | -3,238619 | 0,131267  | 0,119831  |
| ID1067          | ACTG                  |                       | 0,286858  | 0,292436  | -0,200308 | -0,275295 | 1,406065  | -0,429870 | 0,181735  | 0,215451  | 0,235270  | -3,222783 | 0,092247  | 0,612497  |
| ID488759        | CALD1                 |                       | 0,147086  | 0,151249  | 0,149815  | 0,170436  | 0,174098  | 0,164829  | 0,121944  | 0,115058  | 0,133605  | -3,153470 | 0,120066  | 0,128551  |
| ID2212082       | CHP1                  |                       | -0,041872 | 0,381423  | -0,028152 | 0,967046  | 0,845228  | 1,042474  | 0,347794  | -0,257843 | -0,056175 | -3,144641 | -0,099648 | -0,741794 |
| ID509563        |                       | ECHM                  | 0,233083  | 0,201689  | 0,202743  | 0,244917  | 0,213777  | 0,200246  | 0,207277  | 0,245470  | 0,214148  | -3,115284 | 0,175948  | 0,197164  |
| ID1453          | HSPB1                 |                       | 0,225784  | 0,374684  | 0,281711  | 0,661885  | 0,515781  | 0,524655  | -0,204401 | -0,467389 | 0,027855  | -3,097728 | 0,233747  | 0,148984  |
| ID565           | CSDE1                 |                       | 0,209127  | 0,220076  | 0,211649  | 0,243542  | 0,231150  | 0,220585  | 0,194738  | 0,191136  | 0,200158  | -3,084546 | 0,198467  | 0,192781  |
| ID501           |                       |                       | 0,221330  | 0,222759  | 0,227561  | 0,218514  | 0,224287  | 0,220086  | 0,200484  | 0,184953  | 0,201990  | -3,071415 | 0,191492  | 0,190106  |
| ID1367          | RFA2                  |                       | 0,211203  | 0,213618  | 0,215427  | 0,207509  | 0,212467  | 0,215607  | 0,204400  | 0,203405  | 0,206804  | -3,070063 | 0,207321  | 0,204786  |
| ID479360        | CAP2                  |                       | 0,204846  | 0,208202  | 0,213218  | 0,207107  | 0,209724  | 0,209922  | 0,212931  | 0,210692  | 0,218417  | -3,066307 | 0,201015  | 0,203656  |
| ID31086         |                       |                       | 0,211708  | 0,217605  | 0,214873  | 0,226824  | 0,217679  | 0,209392  | 0,191833  | 0,195492  | 0,200996  | -3,060818 | 0,194671  | 0,214540  |
| ID31063         | MYH13                 |                       | 0,212329  | 0,216842  | 0,217102  | 0,222654  | 0,225403  | 0,226243  | 0,184763  | 0,190314  | 0,194428  | -3,057112 | 0,198906  | 0,203851  |
| ID1166          | GIPC1                 |                       | 0,209134  | 0,215558  | 0,214771  | 0,220221  | 0,214827  | 0,214909  | 0,194363  | 0,190040  | 0,197994  | -3,056763 | 0,208043  | 0,212712  |
| ID1492          | HSPB1                 | PIMT                  | 0,211020  | 0,215605  | 0,213573  | 0,217801  | 0,216747  | 0,220908  | 0,192552  | 0,190592  | 0,195315  | -3,046869 | 0,204327  | 0,206712  |
| ID1590          |                       | SEPT15, ACTY, OAT     | 0,171422  | 0,192952  | 0,754918  | -0,188780 | 0,002780  | -0,451483 | 0,482346  | 0,609961  | 0,611916  | -2,949516 | -0,377449 | 0,403555  |
| ID538           |                       |                       | 0,030362  | 0,390289  | 0,167577  | 0,634783  | 1,044813  | 1,343076  | -0,186696 | -0,390119 | -0,164527 | -2,938031 | -0,503045 | -0,162990 |
| ID35204         |                       |                       | 0,012995  | 0,222827  | 0,023963  | 0,594949  | 0,485818  | 0,519876  | -0,175065 | -0,093974 | 0,143533  | -2,927669 | 0,050221  | 0,410610  |
| ID1763762       |                       |                       | 0,341870  | 0,353708  | 0,333715  | 0,363343  | -0,421746 | 0,346248  | 0,322216  | 0,344701  | 0,332940  | -2,831155 | -0,444745 | 0,331672  |
| ID922           | RHG01                 |                       | 0,344021  | 0,465519  | 0,512201  | 0,804599  | 0,641063  | 0,723426  | -0,293212 | -0,519295 | -0,372753 | -2,768734 | -0,193107 | -0,035910 |
| ID307           |                       |                       | 0,361878  | 0,362486  | 0,356196  | 0,387941  | 0,391525  | 0,372202  | 0,378299  | 0,345897  | -1,672952 | -2,686385 | 0,350575  | 0,321665  |
| ID452           |                       |                       | 0,376241  | 0,465829  | 0,384934  | 0,681779  | 0,690266  | 0,729884  | -0,509328 | -0,463994 | -0,574401 | -2,670374 | 0,065274  | 0,156297  |
| ID453           |                       |                       | 0,357882  | 0,373962  | 0,306993  | 0,624969  | 0,575984  | 0,562943  | -0,177490 | -0,101533 | -0,746814 | -2,656084 | 0,090118  | 0,125048  |
| ID1809464       |                       |                       | 0,188120  | 0,238160  | 0,242700  | 0,301477  | 0,255369  | 0,315323  | #DIV/0!   | 0,174098  | #DIV/0!   | -2,627440 | 0,204863  | 0,259875  |
| ID1608          |                       | TCPB                  | -0,218537 | 0,812453  | 0,538652  | 0,684495  | 0,458220  | 0,786404  | 0,461292  | -0,744698 | -0,519910 | -2,624954 | -0,117197 | -0,172457 |
| ID1272          | PP1A                  |                       | -0,240157 | 0,325276  | -0,646098 | 1,538982  | 0,542824  | 0,844618  | -0,350758 | -0,119882 | 0,190439  | -2,609066 | -0,133734 | 0,005289  |
| ID586647        | DC1L2                 |                       | 0,121632  | 0,205744  | 0,174018  | 0,263902  | 0,579525  | 0,449215  | -0,083601 | -0,117864 | -0,095535 | -2,573170 | 0,022108  | 0,050734  |
| ID523641        |                       |                       | 0,375580  | 0,350349  | 0,451704  | 0,064100  | -0,004422 | 0,039146  | 0,097871  | 0,171311  | 0,209525  | -2,554334 | 0,196562  | -0,035977 |
| ID1707          |                       |                       | -0,550318 | -0,448473 | -0,186534 | 1,002700  | 0,959150  | 1,571801  | -0,358237 | -0,379261 | -0,383711 | -2,506478 | 0,537878  | 0,114863  |
| ID686           | HSP7C                 |                       | -0,077704 | 0,048720  | -0,728300 | 0,447910  | 2,104866  | -0,010912 | 0,386658  | -0,554945 | -0,414890 | -2,459952 | 0,089274  | 0,554286  |
| ID3763800       |                       |                       | 0,027539  | 0,073285  | 0,125294  | 0,458828  | 1,097515  | 1,006439  | 0,014702  | 0,105884  | 0,137503  | -2,449652 | -0,092020 | -1,117730 |
| ID765           | LMNA                  |                       | -0,819569 | -0,605425 | -0,467034 | 0,868381  | 0,641257  | 1,570935  | 0,726393  | 0,436459  | 0,586981  | -2,384491 | -0,606680 | -0,543331 |

Table S-4: cluster 4

| ID <sup>1</sup> | Protein <sup>12</sup> |                   | co_0 min  | co_30 min | co_60 min | co_24 h   | co_48 h   | co_72 h   | PI_0 min  | PI_30 min | PI_60 min | PI_24 h   | PI_48 h   | PI_72 h   |
|-----------------|-----------------------|-------------------|-----------|-----------|-----------|-----------|-----------|-----------|-----------|-----------|-----------|-----------|-----------|-----------|
| ID1270          | TALDO                 |                   | -0.345028 | -0.100219 | -0.260001 | 0.908604  | 0.502811  | 0.657758  | -0.042447 | -0.209289 | -0.230031 | -2.312391 | 0.507725  | 0.344409  |
| ID433           | VINC                  |                   | 0.165767  | 0.172968  | 0.169040  | 0.172968  | 0.180284  | 0.172318  | 0.136912  | 0.133050  | 0.134557  | -2.309766 | 0.143156  | 0.148185  |
| ID1093          | SCMC1                 | ILEU              | 0.167039  | 0.173106  | 0.173533  | 0.180272  | 0.181783  | 0.180951  | 0.118729  | 0.114756  | 0.135091  | -2.304787 | 0.152264  | 0.151065  |
| ID33115         |                       |                   | 0.166096  | 0.171981  | 0.177781  | 0.165395  | 0.169530  | 0.154971  | 0.158594  | 0.136277  | 0.168571  | -2.302476 | 0.136349  | 0.121311  |
| ID2070460       |                       |                   | 0.165610  | 0.174162  | 0.164350  | 0.209481  | 0.197373  | 0.268579  | 0.154300  | 0.099033  | 0.113355  | -2.281235 | 0.081725  | 0.082958  |
| ID1473          | ECHM                  |                   | 0.067829  | 0.282142  | 0.213130  | 0.467229  | 0.373995  | 0.506890  | -0.457776 | -0.372613 | -0.192360 | -2.275627 | 0.490077  | 0.328176  |
| ID1461          |                       |                   | -0.307825 | -0.046527 | -0.154253 | 0.698756  | 0.402395  | 1.346790  | -0.499379 | -0.145799 | -0.062674 | -2.261542 | 0.385607  | 0.079066  |
| ID1510          | PRDX3                 |                   | 0.169554  | 0.178383  | 0.177473  | 0.178998  | 0.180057  | 0.183245  | 0.114432  | 0.108668  | 0.119308  | -2.260810 | 0.139820  | 0.145669  |
| ID1572          | SFRS3                 |                   | 0.159366  | 0.168879  | 0.158305  | 0.179482  | 0.168547  | 0.168835  | 0.169480  | 0.151937  | 0.149346  | -2.243535 | 0.114943  | 0.093533  |
| ID36784         |                       |                   | 0.178545  | 0.185609  | 0.179715  | 0.199118  | 0.196333  | 0.192050  | 0.117341  | 0.092065  | 0.025255  | -2.220036 | 0.148069  | 0.150926  |
| ID1041          | MP2K2                 |                   | 0.156541  | 0.162633  | 0.162732  | 0.161399  | 0.164678  | 0.163278  | 0.136391  | 0.133474  | 0.142798  | -2.214973 | 0.137338  | 0.139968  |
| ID771           | TCPG                  |                   | 0.146235  | 0.151799  | 0.149115  | 0.162524  | 0.159677  | 0.163274  | 0.140923  | 0.143923  | 0.143097  | -2.213837 | 0.147474  | 0.152338  |
| ID778           | DPYL2                 | LKHA4             | 0.147841  | 0.157606  | 0.150182  | 0.174405  | 0.166988  | 0.162779  | 0.134497  | 0.130366  | 0.134726  | -2.212907 | 0.148173  | 0.152117  |
| ID490428        | LMNA                  | AGM1              | 0.131799  | 0.133084  | 0.133478  | 0.165271  | 0.164103  | 0.156847  | 0.159755  | 0.151795  | 0.151648  | -2.211412 | 0.153992  | 0.156788  |
| ID590           |                       |                   | 0.152904  | 0.158616  | 0.154656  | 0.177596  | 0.185025  | 0.182477  | 0.129453  | 0.110648  | 0.137116  | -2.210876 | 0.135431  | 0.134235  |
| ID837           | TRXR1                 |                   | 0.150503  | 0.159792  | 0.157445  | 0.157237  | 0.148002  | 0.143375  | 0.138063  | 0.157479  | 0.147636  | -2.210708 | 0.148221  | 0.150278  |
| ID463195        |                       |                   | 0.149798  | 0.156204  | 0.151602  | 0.172742  | 0.189129  | 0.183036  | 0.130831  | 0.123469  | 0.127403  | -2.210398 | 0.134363  | 0.139224  |
| ID1139          | ILEU                  | SCMC1, ROAA       | 0.154214  | 0.159062  | 0.161119  | 0.161668  | 0.156818  | 0.169155  | 0.148766  | 0.129464  | 0.131959  | -2.207671 | 0.141663  | 0.141865  |
| ID1338          |                       |                   | 0.158681  | 0.124456  | 0.157170  | 0.097586  | 0.077888  | 0.088415  | 0.200515  | 0.205878  | 0.202310  | -2.206345 | 0.185878  | 0.155982  |
| ID558           | P3H3                  |                   | 0.144871  | 0.154578  | 0.145871  | 0.159421  | 0.166397  | 0.171754  | 0.146743  | 0.140062  | 0.143038  | -2.199221 | 0.135928  | 0.140752  |
| ID473357        |                       |                   | 0.150813  | 0.155655  | 0.158044  | 0.152221  | 0.142054  | 0.142033  | 0.132427  | 0.150613  | 0.146303  | -2.198383 | 0.158544  | 0.160080  |
| ID893           | DD19A                 | TBG1, PPP5        | 0.154233  | 0.157651  | 0.160915  | 0.165583  | 0.160636  | 0.157919  | 0.133425  | 0.131356  | 0.137283  | -2.192707 | 0.139439  | 0.146091  |
| ID1652          |                       |                   | 0.141833  | 0.144428  | 0.145057  | 0.176988  | 0.165600  | 0.159061  | 0.130387  | 0.127166  | 0.134880  | -2.186194 | 0.154878  | 0.159368  |
| ID1408          | GSTO1                 | ERP29             | 0.147006  | 0.154295  | 0.150359  | 0.155764  | 0.156414  | 0.158765  | 0.146772  | 0.144187  | 0.153906  | -2.185431 | 0.138297  | 0.133308  |
| ID1031          | VAT1                  |                   | 0.158489  | 0.160548  | 0.165293  | 0.164489  | 0.158318  | 0.153979  | 0.143418  | 0.130341  | 0.136875  | -2.184446 | 0.131106  | 0.135479  |
| ID2995227       | SFRS1                 |                   | -0.033852 | 0.196700  | 0.150364  | 0.655706  | 1.768863  | 0.066541  | -0.042691 | -0.235629 | -0.108085 | -2.179931 | 0.286067  | -1.069037 |
| ID471051        | HNRH1                 | TIF1B             | 0.155677  | 0.162170  | 0.157949  | 0.164456  | 0.156489  | 0.158531  | 0.143848  | 0.138029  | 0.137015  | -2.178135 | 0.127748  | 0.131687  |
| ID1514          |                       |                   | 0.152930  | 0.154956  | 0.158655  | 0.121136  | 0.139693  | 0.142228  | 0.147452  | 0.154528  | 0.157830  | -2.173219 | 0.158709  | 0.141800  |
| ID902           | DD19A                 | MPPA              | 0.148796  | 0.155888  | 0.152385  | 0.169953  | 0.166270  | 0.166169  | 0.137780  | 0.134687  | 0.140667  | -2.171033 | 0.126070  | 0.129610  |
| ID849           | TRXR1                 |                   | 0.153336  | 0.155094  | 0.160664  | 0.157951  | 0.153116  | 0.149580  | 0.133186  | 0.132547  | 0.141828  | -2.166789 | 0.141499  | 0.146291  |
| ID464690        |                       |                   | 0.141681  | 0.144068  | 0.141137  | 0.179866  | 0.178929  | 0.191896  | 0.118803  | 0.110978  | 0.115855  | -2.162229 | 0.143489  | 0.154970  |
| ID2194613       |                       |                   | 0.178966  | 0.191355  | 0.186027  | 0.197583  | 0.187129  | 0.168516  | 0.138583  | 0.110422  | 0.141232  | -2.160216 | 0.047507  | 0.072843  |
| ID1116          | UBCP1                 |                   | 0.152858  | 0.157671  | 0.158844  | 0.164309  | 0.164564  | 0.163183  | 0.118405  | 0.116076  | 0.128342  | -2.158615 | 0.148502  | 0.146208  |
| ID1137          | GALK1                 | ILEU, DNJBB, ROAA | 0.142932  | 0.151804  | 0.146330  | 0.160381  | 0.157801  | 0.166252  | 0.153424  | 0.141035  | 0.136488  | -2.152450 | 0.126731  | 0.131160  |
| ID1535          |                       |                   | 0.150673  | 0.160283  | 0.151650  | 0.175357  | 0.177280  | 0.177826  | 0.100309  | 0.109939  | 0.126799  | -2.148224 | 0.143501  | 0.137550  |
| ID1064          | ACTG                  | ACTB              | 0.157505  | -0.136266 | -0.742481 | -0.666455 | 2.023743  | -0.885419 | 0.429750  | 0.475315  | 0.500597  | -2.139658 | -0.101648 | 0.550103  |
| ID467907        | AGM1                  |                   | 0.134997  | 0.139436  | 0.137649  | 0.160161  | 0.138815  | 0.166667  | 0.138960  | 0.146809  | 0.148201  | -2.129076 | 0.142984  | 0.142128  |
| ID1776          | OAT                   |                   | 0.156367  | 0.156309  | 0.155230  | 0.163395  | 0.151093  | 0.127411  | 0.136849  | 0.134898  | 0.137910  | -2.125901 | 0.135973  | 0.138790  |
| ID639           |                       |                   | 0.136729  | 0.144512  | 0.138403  | 0.173785  | 0.161737  | 0.159869  | 0.124358  | 0.124979  | 0.137548  | -2.108918 | 0.131987  | 0.147781  |
| ID703           | SCFD1                 |                   | 0.139233  | 0.135640  | 0.141126  | 0.134113  | 0.128062  | 0.127198  | 0.154896  | 0.157759  | 0.153003  | -2.087063 | 0.153694  | 0.140572  |
| ID644           | DPYL2                 | ZYX, EZRI, CALD1  | 0.133034  | 0.138274  | 0.140323  | 0.169595  | 0.157657  | 0.164485  | 0.120039  | 0.114562  | 0.121238  | -2.077052 | 0.143742  | 0.154839  |
| ID3591281       | IF1AX                 | SORCN             | -0.173512 | -0.019157 | -0.032575 | 0.519033  | 0.866487  | 1.034157  | -0.428172 | -0.373853 | -0.323027 | -2.072082 | 0.636225  | -0.151545 |
| ID1463          | ERP29                 | TPIS, ETHE1       | 0.235740  | 0.325089  | 0.277091  | 0.350104  | 0.319626  | 0.272520  | -0.235726 | -0.105145 | -0.050116 | -2.048703 | 0.090953  | 0.056390  |
| ID1464          |                       |                   | -0.054236 | -0.132419 | 0.560570  | 0.603609  | -0.164862 | -0.447045 | -0.561921 | 0.120662  | -0.012302 | -2.012302 | -0.312943 | 1.074920  |
| ID1980208       |                       |                   | 0.672384  | 0.016361  | 0.193388  | 0.007142  | -0.121183 | 0.397717  | 0.596611  | 0.335360  | 0.420753  | -1.966710 | 0.196256  | -1.239756 |
| ID1800806       |                       |                   | 0.337677  | 0.337213  | 0.338296  | 0.348214  | 0.356852  | 0.335988  | -0.536905 | 0.371892  | 0.335190  | -1.947469 | -0.860518 | 0.244290  |
| ID152055        | CATD                  | CLIC1             | -0.149694 | 0.396069  | 0.389972  | -1.424322 | 1.144783  | 1.957356  | -0.424791 | -0.269706 | 0.368915  | -1.934149 | -0.214171 | -0.323800 |
| ID1723          | CTO77                 |                   | -0.654957 | -0.273663 | -0.492622 | 0.996593  | 1.164817  | 0.916005  | -0.334328 | -0.549268 | -0.041988 | -1.924734 | 0.399962  | 0.312999  |
| ID2379          |                       |                   | 0.191607  | 0.493203  | 0.512445  | 0.422136  | 0.577087  | -0.293026 | -0.819892 | -0.786549 | -0.806266 | -1.812110 | 0.708497  | 1.159840  |
| ID2340727       |                       |                   | 0.190053  | -0.165039 | 0.588655  | 0.376050  | -0.786456 | -0.489159 | -0.277704 | 1.158603  | 0.702733  | -1.698201 | -0.029477 | 0.005391  |
| ID553           | HS90A                 |                   | 1.093562  | 0.840329  | -0.078226 | -0.212631 | 0.633924  | -0.599567 | 0.002018  | -1.273287 | -0.256328 | -1.065097 | 0.461532  | 0.187496  |
| ID258601        |                       |                   | -0.424205 | -0.087470 | -0.899105 | 0.745106  | -0.128866 | 1.414409  | -0.093066 | 0.663888  | 0.597729  | -0.989063 | -1.317539 | 0.270916  |
| ID4106          | HS90B                 | HS90A             | 0.061879  | -0.133240 | -0.698407 | -0.735994 | 0.919539  | -0.736954 | 0.644641  | 0.021036  | 0.439163  | -0.881173 | 0.210335  | 0.668881  |
| ID3270147       | CBX5                  | CATB              | -0.060143 | 0.657171  | -0.021796 | -1.536594 | -0.931686 | 1.051922  | 0.592973  | -0.458557 | -0.511358 | -0.661423 | 1.323830  | 0.390306  |

Table S-4: cluster 5

| Cluster 5       |                       | Z-score <sup>13</sup> |           |           |          |           |           |           |           |           |           |           |           |
|-----------------|-----------------------|-----------------------|-----------|-----------|----------|-----------|-----------|-----------|-----------|-----------|-----------|-----------|-----------|
| ID <sup>1</sup> | Protein <sup>12</sup> | co_0 min              | co_30 min | co_60 min | co_24 h  | co_48 h   | co_72 h   | PI_0 min  | PI_30 min | PI_60 min | PI_24 h   | PI_48 h   | PI_72 h   |
| ID146603        | SET                   | 0.234821              | 0.268989  | 0.107065  | 0.646779 | 0.592468  | 0.391407  | -0.310274 | -2,842435 | -0.520993 | 0.736283  | 0.423044  | 0.456917  |
| ID1804168       |                       | 0.221427              | 0.231039  | 0.226198  | 0.218491 | 0.196811  | 0.207457  | 0.365080  | -2,756645 | #DIV/0!   | 0.241235  | 0.234331  | 0.259534  |
| ID90190         |                       | 0.286358              | 0.062995  | 0.493796  | 0.608336 | 0.787264  | 0.947516  | -0.843133 | -2,485886 | -0.901856 | -0.067513 | 0.604970  | 0.490273  |
| ID1677          | BASP                  | 0.205423              | 0.213447  | 0.195210  | 0.213462 | 0.199660  | 0.205670  | 0.185467  | -2,311546 | 0.166299  | 0.279186  | 0.260052  | 0.257467  |
| ID48368         |                       | 0.228438              | 0.251258  | 0.224974  | 0.245880 | 0.247898  | 0.258269  | 0.156938  | -2,296510 | 0.114525  | 0.197075  | 0.214722  | 0.205802  |
| ID233300        |                       | -0.376617             | 0.005956  | -0.521989 | 1,156967 | 0.883969  | 0.755430  | -0.400017 | -2,219903 | -0.945878 | 0.713701  | 0.531806  | 0.595001  |
| ID1404          | SPEE                  | -0.821359             | -0.612491 | -0.229764 | 0.476610 | 1,085822  | 0.804603  | -1.018401 | -2,144533 | 0.131547  | 1,263666  | 0.362512  | 1,017704  |
| ID386066        |                       | -0.325321             | -0.057291 | 0.242484  | 0.73759  | 0.757064  | 1,227065  | -0.617041 | -2,111281 | -1,178452 | 1,161323  | -0.057603 | 0.005626  |
| ID2549343       |                       | 0.088696              | 0.054446  | 0.634300  | 0.162245 | 0.862299  | 0.821375  | -0.519168 | -2,094292 | -0.419587 | -0.691752 | 0.385302  | 0.543197  |
| ID10923         | HS90A                 | 0.337621              | 0.526198  | 0.000329  | 1,440148 | 1,073386  | 0.820524  | -0.845123 | -2,047555 | -1,399528 | 0.229517  | -0.248418 | 0.170281  |
| ID2742902       |                       | -0.341142             | -0.076760 | 0.275580  | 0.417644 | 0.179285  | 0.902153  | -1.077296 | -2,046174 | -0.818402 | 1,703897  | 0.736719  | 0.570471  |
| ID1142          |                       | 0.121232              | 0.189693  | 0.387370  | 1,218260 | 0.768001  | 1,397259  | -0.988551 | -1,997570 | -1,374388 | -0.146719 | 0.257973  | 1,130760  |
| ID3841          | HS90A                 | -0.548004             | -0.494635 | 0.225453  | 0.770283 | 0.749122  | 1,250953  | -0.894346 | -1,977226 | -1,121747 | 1,027300  | 0.726195  | 0.543478  |
| ID1173          |                       | -0.732285             | -0.049285 | -1,118728 | 1,246477 | 1,047304  | 1,134899  | -0.065332 | -1,975314 | 0.596668  | 0.986044  | -0.401880 | -0.352957 |
| ID89291         |                       | -0.129232             | 0.294976  | -0.417862 | 1,441904 | 0.736940  | 0.864932  | 0.227567  | -1,971541 | -0.663209 | 0.076208  | 0.029150  | -0.470783 |
| ID389942        | FSTL1                 | 0.093299              | 0.466944  | -0.530919 | 0.854359 | 0.786219  | 0.817039  | -0.702473 | -1,961687 | -1,346641 | 0.785615  | 0.296984  | 0.637665  |
| ID1190          |                       | -0.060223             | -0.034196 | 0.052607  | 1,253151 | 0.425041  | 0.002986  | 0.716603  | -1,959125 | -1,550996 | 0.385365  | 0.265626  | 0.599503  |
| ID57056         |                       | -0.238142             | 0.283824  | -0.171740 | 1,301278 | 1,067062  | 0.742250  | -1,186458 | -1,958084 | -0.757281 | 0.413008  | 0.137516  | 0.470018  |
| ID546           | EF2                   | -0.320868             | -0.144583 | -0.029512 | 0.937514 | 1,060274  | 1,575375  | -0.795362 | -1,956123 | -1,290022 | 0.005957  | 0.434557  | 0.524283  |
| ID1547          |                       | -0.432417             | -0.194371 | -0.205180 | 1,244852 | 1,029219  | 1,023474  | -0.676446 | -1,945718 | -1,317593 | 0.364310  | 0.488482  | 0.712465  |
| ID1328          |                       | -0.281109             | -0.229518 | -0.258030 | 0.759023 | 1,296887  | 1,424970  | -1,120369 | -1,942786 | -0.916543 | 0.667627  | 0.633655  | 0.133100  |
| ID5273          | PCNA                  | -0.082460             | -0.098595 | -0.066306 | 1,228325 | 0.792906  | 1,423245  | -0.936174 | -1,916970 | -1,276222 | -0.060813 | 0.436824  | 0.541035  |
| ID790           |                       | -0.160878             | 0.680650  | 0.301753  | 1,672874 | 0.757675  | 0.026408  | -0.318402 | -1,912673 | -1,586356 | 1,019081  | 0.117165  | -0.342527 |
| ID1550          |                       | -0.432417             | 0.078052  | -0.250593 | 1,185587 | 0.822918  | 1,251179  | -1,177127 | -1,890927 | -0.780239 | 0.107881  | 0.428770  | 0.683886  |
| ID3313934       | PSME2                 | 0.154853              | 0.001490  | 0.381210  | 0.287121 | 0.236800  | 0.385152  | -1,298462 | -1,889138 | -1,203947 | 1,981372  | 0.711487  | 0.747405  |
| ID1009          |                       | -0.315352             | 0.003195  | 0.106809  | 1,392257 | 1,214958  | 1,301720  | -0.654448 | -1,866186 | -0.554967 | -0.036691 | -0.072320 | -0.528148 |
| ID495           |                       | 0.045378              | 0.303564  | 0.241911  | 1,113442 | 0.830859  | 1,173354  | -1,255109 | -1,849110 | -1,513991 | -0.164210 | 0.409635  | 0.623224  |
| ID1780          | TBCA                  | 0.189177              | 0.744558  | 0.168435  | 1,041233 | 0.880095  | 0.917352  | -1,832841 | -1,846870 | -0.982127 | 0.370354  | 0.164659  | 0.278563  |
| ID3255127       |                       | 0.583582              | 0.331105  | 0.366239  | 1,071951 | -0.419648 | 0.379185  | -0.294368 | -1,841335 | -1,135333 | 1,498984  | -0.612290 | 0.446674  |
| ID847           |                       | -0.028377             | 0.133484  | 0.160857  | 1,262144 | 1,036981  | 1,753760  | -0.749663 | -1,815392 | -1,218112 | -0.283625 | -0.250823 | -0.072141 |
| ID983           | DNJA2                 | -0.162963             | -0.025076 | -0.135095 | 1,025175 | 0.896893  | 0.882880  | -0.290798 | -1,807260 | -0.538575 | 0.072739  | 0.045234  | 0.055031  |
| ID804           |                       | -0.489265             | -0.047403 | -0.175007 | 1,244160 | 1,063179  | 1,399943  | -0.760200 | -1,801370 | -1,476300 | 0.416214  | 0.307821  | 0.422280  |
| ID1364          |                       | 0.007503              | 0.453868  | 0.031979  | 1,194550 | 1,244790  | 1,141484  | -1,550911 | -1,800189 | -1,048472 | 0.311639  | -0.039368 | 0.131036  |
| ID1411          | NUDT5                 | -0.477461             | -0.305698 | -0.031210 | 0.526372 | 1,352811  | 1,812887  | -1,110710 | -1,797460 | -0.904743 | 0.423255  | 0.327404  | 0.290366  |
| ID31044         |                       | -0.527256             | -0.157067 | -0.448401 | 1,118190 | 0.759859  | 1,095636  | -0.593998 | -1,796497 | -0.855461 | -0.429063 | 0.876764  | 0.742760  |
| ID3464756       |                       | 0.284883              | 0.287810  | 0.286953  | 0.276118 | 0.278591  | 0.257404  | 0.243749  | -1,785782 | -0.753346 | 0.233855  | 0.243687  | 0.268894  |
| ID14100         | CH60                  | -0.435057             | 0.437880  | 0.096595  | 1,464714 | 0.483329  | 1,016629  | -1,216399 | -1,783851 | -0.973335 | 0.772633  | 0.270968  | 0.059052  |
| ID1695          |                       | -0.340860             | -0.049459 | -0.321945 | 1,068701 | 1,220309  | 1,892692  | -1,124322 | -1,782436 | -0.618390 | -0.328425 | 0.233214  | 0.068813  |
| ID1577          |                       | -0.585548             | -0.376512 | -0.613093 | 1,412489 | 0.408675  | 0.726023  | -0.080495 | -1,775502 | -0.898185 | 1,372143  | 0.453351  | 0.299691  |
| ID2294          | STMN1                 | -0.183453             | 0.576763  | -0.596104 | 1,550594 | 1,018411  | 0.811238  | -0.799823 | -1,767338 | -0.784673 | -0.327465 | -0.010088 | 0.430072  |
| ID82135         |                       | -0.253101             | 0.108193  | -0.030749 | 1,091440 | 1,263611  | 0.550191  | -1,522363 | -1,763384 | -1,150439 | 0.308337  | 0.611630  | 0.863719  |
| ID2784333       |                       | 0.162585              | 0.357474  | -0.101819 | 1,002523 | 0.762692  | 0.488029  | -1,009008 | -1,755042 | -0.969404 | 1,805742  | 0.007252  | -0.299589 |
| ID30752         | SODC                  | 0.225632              | 0.221576  | 0.170584  | 1,508264 | 1,183380  | 1,080033  | -1,604520 | -1,719448 | -0.934368 | 0.168705  | -0.121612 | -0.136049 |
| ID542           |                       | 0.002774              | 0.397836  | 0.055618  | 1,167861 | 1,233293  | 1,485634  | -1,010032 | -1,714049 | -1,294609 | -0.793073 | 0.088427  | 0.182052  |
| ID617           |                       | 0.309642              | 0.491616  | 0.026831  | 1,522175 | 1,083524  | 0.818745  | -1,306902 | -1,698233 | -1,445552 | 0.193271  | -0.156854 | 0.210057  |
| ID1651          | SODC                  | 0.052509              | 0.503965  | -0.071159 | 1,021912 | 0.705180  | 1,888416  | -1,621685 | -1,697765 | -0.724076 | -0.222924 | -0.039822 | 0.149717  |
| ID66993         |                       | -0.643712             | -0.236866 | -0.369721 | 1,210436 | 0.871797  | 0.787768  | -1,290562 | -1,690272 | -0.922137 | 0.755787  | 0.860765  | 0.855664  |
| ID1476          |                       | 0.103303              | 0.290209  | 0.245061  | 0.937660 | 1,231339  | 1,258956  | -1,215144 | -1,682566 | -1,652119 | 0.072487  | -0.018925 | 0.447861  |
| ID209100        | ACTG                  | 0.188636              | 0.178987  | 0.194551  | 0.175588 | 0.166909  | 0.176839  | 0.101995  | -1,679778 | 0.078610  | 0.163994  | 0.147871  | 0.146795  |
| ID4489          |                       | -0.095226             | 0.055977  | -0.028082 | 0.998807 | 1,078462  | 1,327671  | -1,477180 | -1,676828 | -1,317043 | 0.455866  | 0.270619  | 0.520925  |
| ID2575          |                       | -0.666368             | 0.231312  | 0.094012  | 1,180595 | 1,329909  | 0.905765  | -1,338585 | -1,668038 | -0.751825 | 0.736304  | 0.364281  | -0.233286 |
| ID68693         | TBB2C                 | -0.295461             | 0.140688  | 0.066162  | 1,316962 | 1,422552  | -0.027421 | -1,054269 | -1,648643 | -0.922960 | 0.977029  | -0.045957 | 0.315575  |
| ID3104          |                       | 0.096564              | 0.172672  | 0.201782  | 1,251778 | 1,035154  | 1,296323  | -1,683558 | -1,629089 | -1,152021 | -0.211023 | 0.268325  | 0.300337  |
| ID315424        |                       | 0.096950              | -0.299960 | -0.062776 | 1,014181 | 1,443992  | 1,385974  | -0.561891 | -1,623125 | -0.908653 | -0.632581 | 0.043324  | -0.053580 |
| ID59353         | EF1B                  | -0.727680             | -0.420469 | -0.639449 | 1,367733 | 1,213612  | 1,011310  | -1,075847 | -1,620896 | -0.813299 | 0.578198  | 0.522043  | 0.749294  |
| ID261244        |                       | 0.155084              | 0.176020  | 0.156300  | 0.160909 | 0.217931  | 0.182228  | 0.113414  | -1,618739 | 0.101676  | 0.122617  | 0.128042  | 0.135174  |
| ID405373        |                       | -0.030104             | 0.611583  | 0.358398  | 1,121949 | 0.716803  | 1,480800  | -1,250899 | -1,614606 | -1,529357 | -0.190733 | -0.014233 | 0.292715  |

Table S-4: cluster 5

| ID <sup>1</sup> | Protein <sup>12</sup> |                   | co_0 min  | co_30 min | co_60 min | co_24 h   | co_48 h   | co_72 h   | PI_0 min  | PI_30 min | PI_60 min | PI_24 h   | PI_48 h   | PI_72 h   |           |
|-----------------|-----------------------|-------------------|-----------|-----------|-----------|-----------|-----------|-----------|-----------|-----------|-----------|-----------|-----------|-----------|-----------|
| ID1224          | NPM                   |                   | -0.033842 | 0.819917  | -0.256164 | 1.453914  | 0.213905  | -1.022810 | -0.464310 | -1.611248 | -0.682116 | 0.015895  | 0.802313  | 0.768522  |           |
| ID1299          |                       |                   | 0.063840  | 0.000598  | 0.125135  | 0.336693  | 0.372565  | 0.252482  | 0.073600  | -1.609078 | 0.033768  | 0.100961  | 0.217328  | 0.057348  |           |
| ID1414          |                       |                   | -0.208350 | -0.023100 | 0.413490  | 0.174010  | 1.123051  | 1.997994  | -1.283189 | -1.605846 | -0.072397 | 0.898549  | -0.815024 | -0.374552 |           |
| ID1226          |                       |                   | 0.103602  | 0.758176  | 0.156749  | 1.642823  | 0.459261  | 0.484637  | -1.236143 | -1.605041 | -1.288129 | 1.104823  | -0.163740 | -0.140812 |           |
| ID2140633       |                       |                   | 0.178394  | 0.169342  | 0.179592  | 0.200245  | 0.199740  | 0.197819  | 0.138370  | -1.572773 | 0.158447  | 0.023156  | 0.147201  | -0.013744 |           |
| ID1736          |                       |                   | -0.436570 | 0.292141  | -0.018453 | 0.935627  | 0.913168  | 0.798689  | -1.255118 | -1.564424 | -1.393775 | 0.225237  | 0.508111  | 1.051677  |           |
| ID245554        |                       |                   | -0.006840 | 0.477190  | 0.048910  | 1.514023  | 0.226973  | -0.023627 | -1.341669 | -1.563998 | -0.725302 | -0.149033 | 0.933543  | 0.742802  |           |
| ID1143          | SPB6                  |                   | 0.161642  | 0.298308  | 0.283125  | 0.720388  | 0.919611  | 1.256077  | -1.268449 | -1.557694 | -1.247228 | 1.649322  | -0.567159 | -0.235613 |           |
| ID1136          |                       |                   | 0.214275  | 0.219776  | 0.786242  | 0.714830  | 0.825113  | 1.146755  | -1.985196 | -1.554267 | -1.130984 | 0.083303  | 0.196686  | 0.504294  |           |
| ID16864         |                       | PRDX4             | -0.894419 | -0.491936 | -0.627797 | 1.338592  | 0.638544  | 1.159552  | -0.782022 | -1.549229 | -0.575016 | 1.094284  | 0.399879  | 0.563137  |           |
| ID566208        |                       |                   | -0.176858 | -0.121828 | -0.053698 | 1.271606  | 1.268065  | 1.294508  | -0.740220 | -1.548908 | -1.227064 | -0.581761 | 0.299439  | 0.171279  |           |
| ID1521          |                       |                   | 0.191647  | -0.030312 | -0.043920 | 0.993486  | 0.946305  | 0.725360  | -1.675673 | -1.530557 | -0.862231 | 0.482974  | 0.488908  | 0.434757  |           |
| ID60178         |                       |                   | -0.868703 | -0.441384 | -0.974499 | 1.679392  | 0.795000  | 1.165161  | -0.626088 | -1.515784 | -0.871061 | 0.798924  | 0.369527  | 0.689247  |           |
| ID1621          |                       |                   | 0.183868  | 0.385360  | 0.152254  | 1.449231  | 0.948792  | 0.722802  | -1.472603 | -1.512573 | -1.022592 | 1.073333  | -0.620733 | -0.018806 |           |
| ID87491         | TPM2                  |                   | 0.164378  | -0.301413 | 0.295089  | 1.258656  | 1.035996  | 0.409668  | -1.568214 | -1.511649 | -0.833805 | 0.901643  | -0.114348 | 0.489411  |           |
| ID652           |                       |                   | -0.561791 | -0.393246 | -0.663021 | 1.357138  | 0.561937  | 0.850378  | -0.949710 | -1.510051 | -0.881949 | 1.559658  | 0.058718  | 0.961855  |           |
| ID2314456       |                       |                   | 0.338987  | 0.375757  | 0.177239  | 0.035057  | 0.555902  | 0.355247  | -0.424558 | -1.504643 | -1.920860 | 0.975574  | 0.526515  | 0.753677  |           |
| ID2977290       |                       |                   | 0.332298  | 0.347422  | 0.307319  | 0.336573  | 0.313572  | 0.318571  | -1.501389 | -1.497905 | 0.263650  | 0.293488  | 0.284272  | 0.275501  |           |
| ID821           | UBP14                 | IMA2              | 0.107756  | 0.180917  | 0.419041  | 1.077479  | 1.003179  | 0.971836  | -1.768078 | -1.495118 | -1.201319 | 0.173630  | 0.225213  | 0.348871  |           |
| ID1394          |                       |                   |           | -0.244810 | -0.076016 | -0.015145 | 0.637479  | 0.698661  | 0.988253  | -1.835278 | -1.493162 | -1.028807 | 1.703174  | 0.513571  | 0.577874  |
| ID1540          |                       |                   |           | -0.650211 | -0.501525 | -0.591076 | 1.067165  | 0.630893  | 0.878676  | -0.269273 | -1.489866 | -1.590833 | 0.530699  | 1.109473  | 1.008552  |
| ID913           |                       |                   | K2C8      | PSMD5     | -0.783269 | -0.843086 | -0.517513 | 1.933865  | 0.309299  | -0.317325 | -0.151845 | -1.488629 | -0.288927 | 0.254103  | 0.989693  |
| ID362785        |                       | -0.203823         |           |           | 0.035513  | 0.310195  | 1.362446  | 0.709903  | 0.892657  | -1.068942 | -1.478516 | -1.357394 | 0.839983  | 0.043836  | 0.124138  |
| ID1452          |                       | -0.536625         |           |           | 0.034195  | 0.733182  | 1.138853  | 0.937636  | 1.338100  | -1.524986 | -1.477434 | -0.815399 | 0.258334  | -0.099339 | 0.078068  |
| ID1716          |                       | -0.700365         |           |           | -0.050289 | -0.367670 | 0.919523  | 1.081172  | 1.438100  | -0.742795 | -1.477112 | -0.845269 | -0.730936 | 0.069332  | 1.223576  |
| ID91144         |                       |                   | -0.091425 | 0.141315  | -0.125835 | 0.966835  | 0.974119  | 1.867086  | -1.352373 | -1.474513 | -1.152909 | -0.130821 | 0.064092  | 0.281724  |           |
| ID680           | HSP7C                 | HSP71, LMNB2      | 0.226560  | 0.314302  | -0.064546 | 1.428395  | 1.064156  | 1.051889  | -0.408527 | -1.469283 | -1.811522 | -0.448067 | 0.161686  | -0.157059 |           |
| ID145564        |                       |                   |           | 0.225162  | -0.131594 | 0.442521  | 1.500602  | 0.723535  | 1.257961  | -0.754271 | -1.460209 | -1.771428 | -0.099748 | -0.196906 | 0.239437  |
| ID182136        |                       |                   |           | -0.781459 | 0.498260  | 0.720229  | 0.949957  | 1.023838  | 0.807065  | -0.444542 | -1.451260 | -0.932685 | -0.358058 | -0.435781 | 0.314922  |
| ID1562          |                       |                   |           | -0.168603 | 0.317794  | 0.170916  | 0.731164  | 0.628423  | 1.633882  | -1.110987 | -1.450127 | -1.242496 | 0.995139  | 0.146078  | -0.402398 |
| ID1200          | NPM                   |                   | 0.250826  | 0.528463  | 0.232507  | 1.189299  | 0.995580  | -0.136030 | -0.328187 | -1.448349 | -2.126473 | 0.346045  | 0.061796  | 0.521036  |           |
| ID317853        |                       |                   | -0.155643 | -0.559721 | -0.371352 | 0.466939  | 1.298598  | 1.903704  | -0.527558 | -1.442357 | -0.754012 | 0.021454  | 0.018260  | 0.107051  |           |
| ID2437          |                       |                   | -1.112307 | -0.709250 | -0.610472 | 1.039943  | 1.050664  | 1.103711  | -0.280800 | -1.441800 | 0.609878  | -0.179155 | 0.229792  | 0.255008  |           |
| ID124470        |                       |                   | -0.116889 | -0.034767 | -0.509105 | 0.850512  | 1.053140  | 1.979935  | -1.192508 | -1.426660 | -0.861744 | 0.013044  | 0.269160  | -0.020857 |           |
| ID1602          |                       |                   | -0.587438 | 0.359590  | -0.397286 | 1.248728  | 0.765109  | 1.189944  | -0.798660 | -1.416431 | -0.853087 | -1.038128 | 0.890733  | 0.377396  |           |
| ID682           | VINC                  | CAZA1, LDHB, RLA0 | -0.205984 | -0.021652 | -0.340153 | 1.035126  | 0.941935  | 1.259964  | -1.677386 | -1.393740 | -1.278071 | 0.599504  | 0.382690  | 0.847642  |           |
| ID1259          |                       |                   | DDAH1     | 0.083361  | 0.185413  | 0.468854  | 0.664836  | 0.582363  | 0.920245  | -1.324614 | -1.381815 | -1.672279 | 0.977024  | 0.119174  | 0.621694  |
| ID1656          |                       |                   | IF1AX     | -0.129960 | 0.100224  | -0.300773 | 1.726003  | 1.201217  | 0.906173  | -1.424956 | -1.381197 | -1.009605 | 0.256484  | 0.174374  | -0.053863 |
| ID216132        |                       |                   |           | 0.137298  | 0.112546  | 0.793824  | 0.021242  | 0.619426  | 1.412785  | -1.600393 | -1.380877 | -1.027847 | -0.883377 | 0.715478  | 0.859052  |
| ID1131          | TMOD3                 |                   | -0.403775 | -0.009528 | -0.593617 | 1.599067  | 1.440639  | 1.461233  | -0.834293 | -1.369602 | -1.111698 | 0.405361  | -0.254009 | -0.228438 |           |
| ID186642        |                       |                   | -0.284226 | -0.143858 | -0.571425 | 0.417528  | 0.646494  | 1.984111  | -0.370392 | -1.343534 | -0.971137 | 0.767026  | -0.058433 | 0.119602  |           |
| ID1395          |                       |                   | -0.481919 | -0.294551 | -0.081004 | 1.065872  | 1.331276  | 1.088707  | -1.669431 | -1.339533 | -1.193495 | 0.499843  | 0.688794  | 0.510402  |           |
| ID341707        |                       | APT               |           | 0.090506  | 0.080545  | 0.198735  | 1.495642  | 0.623222  | 0.541736  | -1.921274 | -1.307869 | -1.013437 | 0.304053  | 0.475982  | 0.508174  |
| ID636           |                       |                   | -0.384570 | -0.033422 | -0.339436 | 1.853031  | 1.011751  | 1.420239  | -1.117131 | -1.304895 | -0.584599 | 0.571571  | -0.837907 | -0.111739 |           |
| ID567           |                       |                   | 0.096506  | 0.503444  | 0.034729  | 1.130088  | 0.553816  | 1.248211  | -2.114218 | -1.302635 | -0.782772 | 0.600797  | -0.353478 | 0.535712  |           |
| ID65305         |                       |                   | 0.034381  | 0.237841  | -0.163505 | 0.965480  | 1.156395  | 1.350587  | -1.477784 | -1.286767 | -1.029257 | -1.007944 | 0.305573  | 0.663013  |           |
| ID1129          |                       |                   | 0.114874  | 0.410716  | 0.009403  | 1.584044  | 0.812104  | 1.343440  | -1.451072 | -1.285953 | -1.234079 | 0.022157  | -0.209000 | -0.111096 |           |
| ID1181          |                       |                   | 0.136023  | -0.036033 | 0.397136  | 1.597692  | 0.961530  | 1.225308  | -1.668360 | -1.278947 | -0.943035 | -0.259716 | -0.488560 | 0.292034  |           |
| ID1666          |                       |                   | -0.756285 | -0.685634 | -0.902441 | 1.093813  | 1.092681  | 1.704729  | -1.121059 | -1.278832 | -0.636140 | 0.575302  | 0.543498  | 0.514192  |           |
| ID1047          | ADRM1                 | ACTG, TMOD3, ATPB | -0.211057 | 0.211657  | 0.140805  | 1.637557  | 1.259509  | 0.854971  | -0.834743 | -1.251990 | -1.636340 | 0.224351  | -0.251316 | -0.087316 |           |
| ID303936        |                       |                   |           | -0.223863 | -0.536181 | -0.107018 | 0.238073  | 0.522203  | 1.153796  | -1.479573 | -1.246776 | -1.162225 | 1.507054  | 1.041600  | 0.669672  |
| ID1557          |                       |                   |           | -0.155729 | 0.561521  | -0.246365 | 1.047230  | 0.323062  | 0.536374  | 0.210562  | -1.244750 | -0.828321 | 0.805505  | -0.223807 | -0.583905 |
| ID16669         |                       |                   | TXNL5     | -0.102679 | 0.150387  | -0.109480 | 0.114105  | 1.218550  | 0.512629  | -1.472283 | -1.240447 | -0.834238 | -0.688552 | 0.505197  | 1.774674  |
| ID314           |                       | 0.112488          |           | 0.356558  | -0.140483 | 1.350699  | 1.181594  | 0.621375  | -1.281422 | -1.231269 | -1.347016 | 1.523149  | -0.333596 | -0.431290 |           |
| ID1931678       |                       | -0.573738         |           | -0.426221 | -0.308535 | 0.055644  | 0.941953  | 0.787053  | -1.008859 | -1.228360 | -0.985711 | 0.080251  | 0.401401  | 2.285184  |           |
| ID2055531       |                       | 0.042722          |           | 0.282496  | -0.243479 | 1.584533  | 0.600887  | 0.614759  | -0.646571 | -1.212930 | -1.111002 | 1.185084  | 0.003198  | -0.803426 |           |
| ID1911469       |                       |                   | 0.024511  | 0.502803  | -0.006542 | 0.312170  | 0.446067  | -0.764080 | -1.757712 | -1.197760 | -0.749686 | 0.964519  | 1.195783  | 1.271056  |           |
| ID327583        | DC112                 |                   | -0.029918 | 0.588863  | -0.104544 | 0.765229  | 1.245867  | 1.592474  | -0.693369 | -1.185897 | -1.152825 | 0.837129  | -0.725514 | -0.928212 |           |
| ID2329037       |                       |                   | -0.118773 | 0.427572  | -0.179414 | 0.574232  | 0.733365  | 2.323280  | -1.019613 | -1.183825 | -0.804338 | 0.618010  | -1.018267 | -0.197725 |           |

Table S-4: cluster 5

| ID <sup>1</sup> | Protein <sup>12</sup> |                     | co_0 min  | co_30 min | co_60 min | co_24 h   | co_48 h  | co_72 h   | PI_0 min  | PI_30 min | PI_60 min | PI_24 h   | PI_48 h   | PI_72 h   |
|-----------------|-----------------------|---------------------|-----------|-----------|-----------|-----------|----------|-----------|-----------|-----------|-----------|-----------|-----------|-----------|
| ID1655          |                       |                     | -0.613441 | -0.615289 | -0.795470 | 0.792359  | 1.186782 | 0.463429  | -1.137011 | -1.179878 | -0.996753 | 1.888281  | 0.941338  | 0.537722  |
| ID154183        |                       |                     | -0.234971 | 0.336209  | 0.102596  | 0.790295  | 1.023440 | 1.322782  | -1.981698 | -1.174021 | -1.229992 | -0.108378 | 0.616218  | 0.510426  |
| ID623           | HS90A                 |                     | -0.473376 | -0.199970 | -0.340537 | 1.459740  | 1.239518 | 1.780192  | -1.056516 | -1.170314 | -1.151149 | -0.192573 | 0.054861  | 0.001980  |
| ID204237        | M6PBP                 | IF35, HNRPF         | -0.632968 | 0.189420  | 0.270925  | 1.467488  | 1.008132 | 0.341305  | -1.009719 | -1.167393 | -1.383365 | 1.821842  | -0.448234 | -0.001972 |
| ID344430        |                       |                     | -0.708225 | -0.633359 | -0.705527 | 0.465540  | 1.241819 | 0.961712  | -1.412168 | -1.162292 | -0.505294 | 1.617286  | 0.534510  | 0.710321  |
| ID57837         |                       |                     | 0.136661  | 0.160616  | 0.120706  | 0.577928  | 0.911501 | 1.513029  | -1.348815 | -1.139130 | -1.081307 | -0.866043 | 0.211709  | 0.586635  |
| ID3763670       |                       |                     | 0.549104  | -0.563309 | -0.021626 | 0.616768  | 0.594249 | 0.617903  | -0.561407 | -1.136019 | -1.688927 | 0.567353  | 0.582322  | 0.585426  |
| ID2051821       |                       |                     | -0.052741 | 0.197788  | -0.293917 | 1.443855  | 1.057743 | 0.701090  | -1.153751 | -1.128024 | -1.311818 | 1.593387  | -0.081722 | -0.573543 |
| ID674           |                       |                     | -0.505558 | -0.367647 | -0.260630 | 0.877956  | 0.510069 | 0.895645  | -1.071473 | -1.108124 | -0.831324 | 2.448517  | -0.156247 | 0.180945  |
| ID20028         | NEBU                  |                     | 0.059538  | 0.016780  | -0.061665 | 1.524981  | 0.930093 | 0.715079  | -1.184794 | -1.096712 | -1.510422 | -0.038828 | 0.461395  | 0.174847  |
| ID1820          |                       |                     | -0.713827 | -0.461932 | -0.571040 | 0.937422  | 1.226008 | -0.022442 | -1.145449 | -1.087054 | -0.892714 | 0.328120  | 1.277566  | 1.207372  |
| ID5884          |                       |                     | 0.185626  | 0.067062  | 0.129149  | 0.432422  | 0.743011 | 1.438901  | -1.401977 | -1.086338 | -1.050064 | -0.753500 | 0.331378  | 0.775954  |
| ID440482        |                       |                     | -0.551149 | -0.306037 | -0.263997 | 0.365856  | 0.453958 | 0.703507  | -0.957853 | -1.083874 | -0.959384 | -0.746997 | 1.560597  | 1.598626  |
| ID870           | TBA1B                 | VIME, TBB3          | -0.368620 | -0.396521 | -0.191453 | 0.946113  | 1.040560 | 1.722525  | -1.674419 | -1.083517 | -1.082661 | 0.779641  | 0.313733  | 0.189530  |
| ID1053          | ACTG                  | M6PBP               | -0.405215 | -0.695573 | -0.479801 | 1.091488  | 1.295966 | 1.899800  | -0.826184 | -1.081086 | -1.192939 | 0.219344  | 0.049022  | 0.180014  |
| ID309937        | GRAP1                 | GANAB               | 0.224287  | 0.232476  | 0.214901  | 0.255641  | 0.239642 | 0.238414  | -1.038064 | -1.075816 | 0.123315  | 0.206479  | 0.211682  | 0.218663  |
| ID663           | MEPD                  | THOP1               | -0.075076 | 0.430906  | -0.134892 | 1.437767  | 1.566366 | 1.154161  | -1.415967 | -1.074375 | -1.281858 | -0.558671 | -0.140691 | -0.047338 |
| ID1998321       |                       |                     | -0.528771 | -0.451520 | -0.625081 | 1.435269  | 1.195944 | 1.742662  | -0.440451 | -1.072336 | -0.456071 | -1.092382 | 0.070755  | -0.051112 |
| ID1821          | THIO                  | RFA3, LEG1, COX5A   | -0.239074 | 0.125063  | -0.098817 | -0.400469 | 0.664673 | -0.165817 | -1.512435 | -1.065732 | -0.897227 | 1.234760  | 0.592185  | 2.071580  |
| ID1759          |                       |                     | -0.033313 | 0.608729  | 0.347992  | 1.198956  | 0.598957 | 0.858668  | -0.905736 | -1.034028 | -1.570201 | 0.240821  | -0.290098 | 0.039459  |
| ID1993029       |                       |                     | -0.376246 | -0.119949 | -0.152603 | 0.261282  | 3.245711 | 0.972896  | -0.535353 | -1.028502 | -0.636848 | 1.071859  | #DIV/0!   | #DIV/0!   |
| ID1960958       |                       |                     | -0.178754 | -0.028375 | -0.133445 | 0.884430  | 0.747345 | -0.006064 | -1.154435 | -1.001040 | -0.507103 | 1.254558  | 0.458024  | -0.021503 |
| ID1964508       |                       |                     | -0.794245 | -0.502357 | -0.647224 | 0.728297  | 0.983546 | -0.281556 | -0.643555 | -0.902927 | -0.964140 | 0.265313  | 0.678861  | 2.233684  |
| ID637           | EZRI                  |                     | -0.031799 | 0.132462  | 0.064577  | 1.592357  | 1.059741 | 0.275186  | -1.578226 | -0.988411 | -0.826667 | 1.751660  | -0.565824 | -0.447141 |
| ID3759858       |                       |                     | -0.482852 | -0.004423 | -0.759488 | 0.945639  | 1.375913 | 1.205323  | -0.727488 | -0.984287 | -0.612601 | 1.113163  | -0.513998 | -0.405110 |
| ID470           |                       |                     | -0.622960 | -0.170415 | -0.848823 | 0.839007  | 0.979150 | 1.683414  | -1.069267 | -0.982383 | -1.019106 | 0.549634  | 0.290400  | 0.290400  |
| ID3763000       | CHM4B                 | RPB3                | -0.636697 | -0.256289 | -1.029827 | 1.395953  | 1.798614 | 0.949104  | -0.130808 | -0.976958 | -1.046921 | 0.174391  | 0.165435  | -0.362400 |
| ID426           |                       |                     | 0.052499  | -0.279406 | -0.997927 | 1.350838  | 0.444045 | -0.089925 | -0.922483 | -0.800835 | -1.281172 | 0.765226  | 0.257704  | 0.257704  |
| ID485827        |                       |                     | -0.222546 | -0.060912 | -0.766287 | 1.458899  | 0.962298 | 0.853154  | -1.305300 | -0.913444 | -1.369354 | 0.524995  | 0.319228  | 0.650517  |
| ID3763682       |                       |                     | -0.384613 | 0.217988  | -0.976627 | 0.636121  | 0.089553 | 0.952247  | -0.553711 | -0.896807 | -1.572024 | 1.774165  | 0.615679  | 0.541570  |
| ID341           |                       |                     | -0.086614 | 0.020449  | -0.225332 | 0.853415  | 0.442117 | 1.818745  | -0.696321 | -0.890178 | -0.979698 | 0.402466  | -0.249982 | -0.308451 |
| ID2846419       | GRP78                 |                     | -0.287099 | -0.864439 | -0.131072 | 0.609634  | 1.024727 | 1.471017  | -0.170200 | -0.884211 | -1.360816 | 0.701555  | 0.148467  | -0.082175 |
| ID1045          |                       |                     | 0.061955  | 0.253869  | 0.041936  | 0.551957  | 0.283459 | 1.489943  | -1.445545 | -0.853179 | -0.783877 | -0.095546 | 0.529913  | -0.058772 |
| ID16655         | PHP14                 |                     | -0.115072 | 0.188273  | -0.087215 | -0.037931 | 1.292633 | 0.824696  | -1.231228 | -0.853073 | -0.708120 | -1.294454 | 0.119321  | 1.578556  |
| ID1645          | NDKA                  | BT3L4               | -0.176925 | 0.314087  | 0.225099  | 0.922754  | 1.322614 | 1.626950  | -1.225491 | -0.835193 | -1.729147 | -0.230029 | -0.153817 | -0.118410 |
| ID113114        |                       |                     | 0.069689  | 0.466280  | -0.303724 | 1.094137  | 1.138036 | 1.298633  | -1.939402 | -0.832770 | -1.276959 | 0.251074  | -0.043945 | 0.141720  |
| ID464           | HNRPU                 | HNRH1               | -0.358461 | 0.014134  | -0.438501 | 0.853848  | 1.051281 | 1.366452  | -1.183828 | -0.818802 | -1.459281 | -0.390312 | 0.701462  | 0.564431  |
| ID157378        |                       |                     | -0.505487 | 0.005376  | -0.783309 | 2.235782  | 1.279778 | -0.164655 | 0.160614  | -0.767892 | -0.520819 | 0.185143  | -0.584894 | -0.493353 |
| ID1630          | MTND                  | SSRD                | 0.159428  | 0.625662  | -0.217628 | 1.085942  | 0.898341 | 0.928440  | -1.664182 | -0.757019 | -0.207066 | -0.346270 | -0.118744 | -0.473471 |
| ID2998          | TBB2C                 | TFG                 | -1.115619 | -0.943873 | -0.894070 | 1.298743  | 0.700077 | 1.477991  | -1.011027 | -0.747814 | -0.767309 | 1.180147  | 0.493219  | 0.624572  |
| ID16938         | PSB4                  |                     | -0.663416 | -0.467852 | -0.718850 | 1.499183  | 0.736134 | 0.767489  | -0.532291 | -0.747376 | -0.920044 | 1.465474  | 0.038264  | -0.090345 |
| ID13655         | IF4A1                 | NDRG3, RBBP7, PDIA6 | -1.225765 | -0.708701 | -0.707401 | 0.994118  | 1.150387 | 2.198200  | -0.395096 | -0.720578 | 0.050611  | -0.350546 | -0.346511 | -0.026356 |
| ID1619          |                       |                     | -0.495690 | -0.884505 | 0.379708  | 1.875551  | 0.766660 | 0.330497  | -0.316402 | -0.708898 | -0.010101 | -1.063306 | -0.690199 | 0.550859  |
| ID1197          |                       |                     | -0.967000 | -0.510951 | -0.526847 | 1.828956  | 0.968129 | 1.666647  | -0.403355 | -0.699456 | -0.965804 | -0.923338 | 0.040251  | 0.261933  |
| ID1074          | ACTG                  |                     | -1.158985 | -1.038484 | -0.530069 | 1.166100  | 1.210721 | 1.620671  | -0.770388 | -0.691274 | -1.096488 | 0.673118  | 0.093525  | 0.689834  |
| ID463           |                       |                     | -0.298758 | -0.123182 | -0.446548 | 0.798287  | 0.408688 | 1.097463  | -1.311579 | -0.687618 | -1.395798 | 0.062328  | 1.046208  | 0.866091  |
| ID1996662       |                       |                     | -0.555937 | -0.162987 | -0.257529 | 1.305267  | #DIV/0!  | 2.168148  | -0.616745 | -0.666774 | -0.919131 | 1.053015  | #DIV/0!   | #DIV/0!   |
| ID1686          | STMN1                 |                     | -0.367223 | 0.544511  | -0.464570 | 1.188114  | 0.621691 | -0.480788 | -2.027602 | -0.657748 | -0.413870 | 1.988515  | 0.238248  | 0.327850  |
| ID2048120       |                       |                     | -0.488726 | -0.331640 | -0.616788 | 0.135051  | 2.204571 | 0.857076  | -0.518101 | -0.656817 | -0.425439 | 1.041922  | -0.194277 | -0.292348 |
| ID58577         |                       |                     | 0.315508  | 0.319603  | 0.293264  | 0.337705  | 0.334662 | 0.326769  | -2.395393 | -0.649156 | 0.233265  | 0.315441  | 0.318622  | 0.328569  |
| ID505           | GRAP1                 | GANAB               | -0.442542 | -0.385091 | -0.582228 | 1.334684  | 0.979065 | 1.993595  | -0.812348 | -0.634858 | -1.148269 | -0.275293 | -0.302686 | 0.207146  |
| ID3761869       |                       |                     | -0.631513 | -0.505670 | -0.879076 | 1.446417  | 0.682802 | 1.004886  | -0.515889 | -0.633207 | -0.348695 | 1.033540  | #DIV/0!   | 0.410395  |
| ID1991205       |                       |                     | -0.345110 | -0.497428 | -0.684016 | 1.140946  | 0.148892 | 0.662846  | -0.800371 | -0.629790 | -0.591902 | -0.283715 | #DIV/0!   | 2.411626  |
| ID4808          |                       |                     | -0.180833 | -0.619308 | -1.276922 | 1.848954  | 0.708733 | 0.821281  | -1.102189 | -0.618629 | -0.206166 | 0.570357  | 0.396815  | -0.199502 |
| ID338842        |                       |                     | -0.807313 | -0.293137 | -0.533709 | 1.355266  | 1.223549 | 0.632369  | -0.470263 | -0.595363 | -1.069493 | 0.428290  | 1.069069  | -0.832194 |
| ID2315592       |                       |                     | -0.971724 | 0.093437  | -0.375904 | 0.291304  | 0.681456 | 0.293104  | 0.112812  | -0.575521 | -0.638748 | -0.572287 | -0.390322 | 0.184046  |
| ID1693          | TXD12                 | STMN1               | -0.878681 | 0.556865  | -0.773994 | 1.460419  | 0.797348 | 0.039947  | -1.345459 | -0.569373 | 0.182203  | 1.130180  | -0.316521 | -0.000389 |
| ID196961        |                       |                     | -0.408235 | -0.416953 | -0.348588 | 1.453684  | 1.121575 | 1.958495  | -1.079680 | -0.534253 | -1.242020 | -0.594108 | -0.231288 | 0.172843  |
| ID1954          |                       |                     | -0.283429 | -0.248924 | -0.224955 | -0.204704 | #DIV/0!  | 2.237610  | -0.650536 | -0.508330 | -0.484667 | 0.017609  | #DIV/0!   | 0.472972  |

Table S-4: cluster 5

| ID <sup>1</sup> | Protein <sup>1,2</sup> |       | co_0 min  | co_30 min | co_60 min | co_24 h   | co_48 h   | co_72 h   | PI_0 min  | PI_30 min | PI_60 min | PI_24 h   | PI_48 h   | PI_72 h   |
|-----------------|------------------------|-------|-----------|-----------|-----------|-----------|-----------|-----------|-----------|-----------|-----------|-----------|-----------|-----------|
| ID425876        | PSMD5                  | TXND5 | -0,470365 | -0,007321 | -1,084767 | 1,727698  | 0,622813  | 0,326883  | -1,041472 | -0,457944 | -0,125974 | -0,176268 | 0,336998  | 0,305651  |
| ID907           |                        |       | -0,918868 | -0,974301 | 0,034454  | 1,022432  | 0,801782  | 2,154774  | -0,088658 | -0,380679 | -0,570100 | 0,317105  | -0,837889 | -0,480773 |
| ID1486          |                        |       | -0,245677 | -0,103785 | 0,024636  | 0,469187  | 0,862954  | -0,037087 | -1,231085 | -0,374641 | -0,689384 | -1,470662 | 1,184434  | 1,243444  |
| ID500           |                        |       | -0,164010 | -0,436651 | -0,544148 | 1,118988  | 1,214300  | 1,866192  | -1,320422 | -0,332608 | -1,049863 | 0,050328  | -0,431739 | 0,042215  |
| ID1048          |                        |       | -0,311490 | 0,321994  | -0,793107 | 1,324491  | -0,274283 | 1,254796  | -0,907455 | -0,320459 | 0,010654  | -0,950876 | 0,292959  | 0,115057  |
| ID2016883       |                        |       | -0,614902 | 0,375373  | -0,969286 | 0,406373  | 0,310004  | 2,275466  | -0,500912 | -0,298166 | -0,223067 | -0,315262 | 0,184376  | -0,708812 |
| ID27793         |                        |       | -0,568556 | -0,512300 | -0,659649 | 1,253714  | 1,696520  | 1,083789  | -1,150925 | -0,296242 | -0,967343 | -1,167454 | 0,345343  | 0,651239  |
| ID3763684       |                        |       | -0,297658 | 0,154697  | -0,322911 | 0,535872  | 1,017503  | 2,288139  | -1,511091 | -0,193041 | -0,995532 | 0,128376  | -0,359139 | -0,413122 |
| ID438739        |                        |       | -0,536521 | 0,527806  | -1,187986 | 0,702840  | -0,032248 | 1,899150  | -1,137490 | -0,169684 | -0,324661 | -0,159916 | 0,158014  | 0,220718  |
| ID3761658       |                        |       | 0,381906  | 0,181682  | -0,428724 | 1,490185  | 1,077886  | 0,894560  | -1,826630 | -0,165269 | -1,217361 | -0,102092 | -0,208439 | -0,103226 |
| ID3661699       | ANXA1                  | DCPS  | -1,175541 | -0,465176 | -0,704449 | 1,916693  | 1,002978  | 1,463139  | 0,111551  | -0,115151 | -0,952392 | 0,339989  | -0,533250 | -0,803395 |
| ID1684          | STMN1                  | PTN1  | -0,915084 | -0,039414 | -1,073307 | 1,289569  | 0,961000  | 0,625612  | -2,204423 | -0,062905 | -0,128480 | 1,384134  | 0,232090  | 0,277240  |
| ID1782          |                        |       | -0,484882 | -0,534304 | -0,298989 | -0,101505 | 1,294182  | 1,000390  | -1,259979 | -0,048690 | -1,153547 | 0,913006  | 0,068330  | 0,834240  |
| ID2318312       |                        |       | -0,142282 | 0,117246  | -1,014335 | 0,356768  | 0,814315  | 1,866161  | -1,407963 | -0,013432 | -0,115474 | -0,152566 | -0,281769 | -0,064809 |
| ID305           |                        |       | 0,139389  | 0,130898  | 0,155550  | 0,217262  | 0,277977  | 0,207905  | 0,115694  | 0,115857  | -2,160516 | 0,137283  | 0,153926  | 0,166906  |
| ID2617667       |                        |       | -0,659090 | -0,461336 | -0,244336 | 0,724801  | 1,980422  | 0,459268  | -1,024529 | 0,138024  | -0,800146 | 0,313923  | -0,403887 | 0,055367  |
| ID183880        |                        |       | 0,292865  | 0,296926  | 0,302210  | 0,288018  | 0,291134  | 0,289186  | -0,842138 | 0,142397  | -1,796350 | 0,258622  | 0,270114  | 0,271671  |
| ID1467          |                        |       | -1,141619 | -0,162479 | 0,234890  | 1,362281  | 1,154275  | 0,798371  | -2,049002 | 0,263703  | -0,878831 | 0,527766  | -0,178895 | 0,201481  |
| ID2912567       |                        |       | 0,156946  | 0,175552  | 0,170336  | 0,172497  | 0,173159  | 0,161285  | -1,249988 | #DIV/0!   | #DIV/0!   | 0,168834  | 0,175997  | 0,189008  |

Table S-4: cluster 6

| Cluster 6       |                       | Z-score <sup>13</sup> |           |           |           |           |           |           |           |           |           |           |           |
|-----------------|-----------------------|-----------------------|-----------|-----------|-----------|-----------|-----------|-----------|-----------|-----------|-----------|-----------|-----------|
| ID <sup>1</sup> | Protein <sup>12</sup> | co_0 min              | co_30 min | co_60 min | co_24 h   | co_48 h   | co_72 h   | PI_0 min  | PI_30 min | PI_60 min | PI_24 h   | PI_48 h   | PI_72 h   |
| ID232052        | SSRD                  | 0,177923              | 0,169317  | 0,201046  | 0,166393  | 0,125181  | 0,142631  | 0,159560  | -1,643747 | 0,070164  | 0,184162  | 0,158458  | 0,134952  |
| ID1785181       |                       | 0,321560              | 0,320422  | 0,321036  | 0,327466  | 0,327466  | 0,327587  | 0,287335  | -1,479481 | 0,298902  | 0,239568  | -0,590704 | -0,648010 |
| ID613           |                       | 0,232215              | 0,235387  | 0,234433  | 0,250937  | 0,245832  | 0,239320  | 0,144160  | -1,417680 | 0,189101  | 0,191899  | 0,137944  | -0,989993 |
| ID1660          |                       | 0,454554              | 0,720451  | 0,899359  | -0,629561 | 0,149751  | -0,257891 | 0,044025  | -1,179862 | 0,435935  | -0,198745 | -0,344657 | -0,143046 |
| ID1705          |                       | 0,600389              | 0,980464  | 0,843559  | 0,409812  | 0,335579  | -1,196145 | -0,366406 | -1,133027 | -0,361486 | -0,061107 | 1,581843  | -1,648753 |
| ID1780185       | CBX3                  | 0,239510              | 0,240565  | 0,240339  | 0,242229  | 0,258342  | 0,256046  | 0,211799  | -1,075116 | 0,206555  | 0,124863  | -1,024667 | 0,147669  |
| ID1543          |                       | 0,263439              | -0,990895 | 0,172144  | 0,277326  | 0,295980  | 0,296551  | 0,183515  | -1,073352 | 0,143695  | 0,145133  | 0,181387  | 0,141360  |
| ID1618          |                       | 0,232135              | 0,247815  | 0,237546  | 0,248852  | 0,212074  | 0,255079  | -1,001749 | -1,025244 | 0,178494  | 0,151850  | 0,194981  | 0,159147  |
| ID1564          |                       | 0,214692              | 0,211360  | 0,301936  | 0,231973  | 0,233923  | 0,287687  | 0,133463  | -1,008937 | 0,179953  | 0,147730  | 0,149096  | -1,045943 |
| ID1819877       |                       | 0,241842              | 0,218926  | 0,216670  | 0,225544  | 0,202629  | 0,210115  | 0,211178  | -0,998113 | 0,230975  | 0,215629  | -1,029397 | 0,168370  |
| ID1785527       | NPM                   | 0,230723              | 0,231530  | 0,231850  | 0,247148  | 0,247912  | 0,241957  | 0,199440  | -0,989045 | 0,213699  | 0,022117  | 0,214347  | -1,086149 |
| ID1225          |                       | -0,326522             | -0,561186 | 0,119095  | 1,440664  | -0,010086 | -1,554846 | 0,837948  | -0,904178 | 0,184751  | 0,785969  | -0,185327 | 0,370211  |
| ID3085623       |                       | 0,901266              | 1,063323  | 0,993527  | 0,295416  | 0,220826  | -0,536268 | -0,698837 | -0,857053 | -0,320850 | 0,177794  | 0,200782  | -1,395477 |
| ID1657          |                       | 1,331529              | 0,989409  | 0,239167  | 0,108978  | 0,159248  | 0,065423  | -0,729109 | -0,808145 | -0,436839 | -0,314979 | 0,507237  | -1,190663 |
| ID2110071       |                       | 0,277891              | 0,283416  | 0,277564  | 0,301174  | 0,290248  | 0,295195  | -0,776248 | -0,783573 | 0,228894  | 0,220159  | -0,782813 | 0,223133  |
| ID1582          | C1QBP                 | 0,607445              | 0,568800  | -0,313954 | -0,393057 | -0,903899 | 0,269977  | -0,405127 | -0,760260 | -0,265769 | -0,170166 | 0,616335  | 1,107135  |
| ID1787194       |                       | 0,268746              | 0,269665  | 0,269259  | 0,284099  | 0,281419  | 0,281993  | 0,253257  | -0,757207 | 0,255078  | 0,194261  | 0,232725  | -1,784730 |
| ID2970570       |                       | -0,102428             | 0,156230  | -0,114767 | 0,045038  | 0,723876  | 0,326052  | 0,619287  | -0,618064 | -1,128500 | -0,143751 | 0,584561  | -0,383472 |
| ID1363          |                       | 0,212075              | 1,359461  | 0,879377  | -0,110284 | -0,518612 | -1,193202 | -0,240447 | -0,606542 | 1,782673  | -0,527210 | -0,688464 | -0,480627 |
| ID1837103       |                       | 0,403905              | 0,022169  | 0,509670  | -0,576590 | -0,484390 | -1,877453 | 0,490232  | -0,531266 | 0,093416  | 0,495469  | 0,423651  | 1,155054  |
| ID1563          | NPM                   | 0,915075              | 0,525933  | 1,211148  | -0,100356 | -0,014687 | 0,009565  | -0,265476 | -0,500979 | -0,383142 | -0,400245 | -0,303087 | -0,793811 |
| ID1209          |                       | -0,429526             | 0,568407  | -0,096088 | 0,928836  | 0,771247  | -0,964509 | 1,301729  | -0,488119 | -1,513679 | -0,026839 | -0,632304 | 0,574135  |
| ID1265          |                       | -0,282654             | 0,590726  | -0,424907 | 0,982088  | -0,092118 | 0,530458  | 0,911298  | -0,460706 | -0,915029 | -1,033179 | -0,213770 | 0,149500  |
| ID2298466       |                       | 0,028866              | 0,189903  | 0,071678  | 1,409942  | 0,237358  | -0,831381 | -0,318835 | -0,458806 | -0,420324 | 0,113471  | -0,532606 | 0,539102  |
| ID3184881       |                       | 0,884173              | 1,274161  | 1,035239  | -0,001580 | -1,775753 | -0,748351 | -0,675604 | -0,339917 | -0,375858 | 0,043059  | 1,031441  | -0,340245 |
| ID2588249       | ANXA2                 | 0,597310              | 1,222507  | -0,025040 | 0,147886  | 0,195698  | 0,647906  | -1,284759 | -0,259745 | 0,075112  | -0,694441 | -0,551518 | -0,244525 |
| ID2000013       | TCTP                  | 0,279419              | 0,604487  | 0,804987  | 1,020296  | -0,368492 | -1,656056 | -0,653580 | -0,111503 | -0,190780 | 1,113938  | 0,099631  | -0,663862 |
| ID1819121       | ID1676                | 0,398432              | 0,071901  | 0,323549  | -0,209676 | -1,570946 | -0,212359 | 0,332534  | -0,091606 | 0,577271  | 2,096721  | -0,491285 | -0,700354 |
| ID1676          |                       | 0,099597              | 0,734210  | 1,335952  | -0,744898 | -0,165032 | -0,385844 | 0,320410  | -0,072621 | 0,179359  | -0,272660 | -0,336638 | -0,760000 |
| ID1864524       |                       | 0,743065              | 0,268087  | 0,915578  | -1,140100 | 0,093461  | 0,818705  | -0,524073 | -0,028501 | -0,504057 | 0,317549  | -0,310745 | -0,569581 |
| ID2300514       |                       | 0,364332              | 0,503722  | 0,347735  | -0,388593 | -0,746600 | -1,848438 | -0,013175 | -0,012838 | 0,108222  | 0,584408  | 0,715132  | 0,532195  |
| ID3056834       |                       | 0,809024              | 1,127921  | 0,896927  | -0,391522 | -0,203885 | -2,186996 | -1,208121 | -0,006182 | -0,054850 | 0,917799  | 0,187099  | 0,342234  |
| ID522           | PRDX4                 | 0,189099              | 0,192066  | 0,193164  | 0,211642  | 0,233703  | 0,202581  | 0,129183  | 0,050843  | 0,143773  | -0,055556 | 0,134655  | -1,626333 |
| ID3435858       |                       | 0,156119              | 0,161757  | 0,140800  | 0,150347  | -2,093173 | 0,128385  | 0,126712  | 0,059234  | 0,103060  | 0,112105  | 0,299155  | 0,160233  |
| ID642           |                       | 0,167827              | 0,170712  | 0,169578  | 0,185608  | 0,180358  | 0,177894  | 0,106674  | 0,080008  | 0,124872  | 0,125397  | 0,107411  | -1,564988 |
| ID306           |                       | 0,138267              | 0,124190  | 0,123558  | 0,216713  | 0,238022  | 0,195968  | 0,153583  | 0,098056  | -2,859515 | 0,157268  | 0,160732  | 0,170545  |
| ID569671        |                       | 0,450070              | 0,851529  | 0,421003  | 0,657845  | 0,272090  | -1,096932 | 0,291619  | 0,100156  | 0,351477  | -0,892515 | -0,145103 | -1,484368 |
| ID9000          | CALU                  | 1,509801              | 1,450733  | 1,450778  | -0,221177 | -0,710737 | -0,038755 | -0,414462 | 0,100503  | -0,683984 | -1,683185 | -0,962856 | -0,217455 |
| ID2033833       |                       | 0,122838              | 0,090184  | 0,104180  | 0,167151  | 0,127803  | -1,533064 | 0,161991  | 0,101769  | 0,154806  | 0,225607  | 0,179657  | 0,153481  |
| ID2006762       |                       | 0,183733              | 0,199550  | 0,175367  | 0,184744  | 0,264432  | 0,202503  | 0,131204  | 0,106448  | 0,141396  | 0,090421  | 0,004576  | -2,037536 |
| ID2204207       |                       | 0,164232              | 0,186378  | 0,179409  | -1,370596 | 0,260532  | 0,165619  | 0,129659  | 0,111574  | 0,127747  | 0,093669  | 0,315041  | 0,091833  |
| ID3763337       |                       | 0,208699              | 0,198654  | 0,207957  | 0,203814  | 0,163188  | 0,188998  | 0,174779  | 0,117870  | 0,154274  | 0,076597  | -1,701339 | 0,025659  |
| ID315           | QCR1                  | 0,173581              | 0,174663  | 0,150247  | 0,204985  | 0,222056  | 0,216093  | 0,185804  | 0,122738  | 0,035419  | 0,127862  | 0,141388  | -1,526956 |
| ID1266          |                       | 0,736975              | 1,694932  | 0,539823  | -0,150002 | -0,445835 | -0,687398 | 0,294760  | 0,134543  | -0,485029 | -0,708932 | -0,609715 | -0,491355 |
| ID1792282       |                       | 0,162208              | 0,165944  | 0,165861  | 0,177117  | 0,179721  | 0,170114  | 0,124213  | 0,136979  | 0,138234  | 0,111935  | 0,101759  | -2,141468 |
| ID1788919       |                       | 0,163497              | 0,167242  | 0,166771  | 0,182952  | 0,180050  | 0,177914  | 0,132192  | 0,139268  | 0,142423  | 0,053337  | 0,108486  | -1,600797 |
| ID1228          |                       | 0,764898              | 0,876263  | 0,914077  | -0,501836 | -0,863510 | -1,300381 | 0,886385  | 0,147873  | 0,218135  | -0,395018 | -0,600699 | -0,244942 |
| ID1816422       | DPOD2                 | 0,205598              | 0,166982  | 0,152104  | 0,173737  | 0,147921  | 0,150748  | 0,147770  | 0,178206  | 0,186747  | 0,181604  | -1,572373 | 0,066859  |
| ID244116        |                       | 0,235343              | 0,241087  | 0,234280  | 0,255423  | 0,258985  | 0,262231  | 0,210537  | 0,184045  | 0,170298  | -1,562495 | -1,055679 | 0,174412  |
| ID1987569       |                       | 0,104863              | 0,080558  | 0,122687  | -2,076626 | 0,172321  | 0,118826  | 0,147995  | 0,185905  | 0,222109  | 0,116098  | 0,131768  | 0,183364  |
| ID24906         |                       | 0,259638              | 0,262884  | 0,260425  | 0,276088  | 0,269112  | 0,258219  | 0,146444  | 0,192299  | -1,016907 | 0,150440  | 0,242094  | -1,341619 |
| ID2596060       |                       | 0,375272              | 1,379010  | 0,065808  | 0,033488  | -0,828059 | -1,526795 | 0,799930  | 0,193627  | 0,202730  | -0,105346 | -0,232126 | -0,383876 |
| ID1866181       | ID228298              | 0,292298              | 0,213022  | 0,228259  | 0,159229  | 0,291315  | 0,183399  | 0,117647  | 0,219967  | 0,155838  | 0,089951  | 0,044883  | -1,843427 |
| ID2728784       |                       | 0,118110              | 0,028171  | 0,123886  | 0,119171  | 0,088563  | -1,559543 | 0,242182  | 0,225229  | 0,230972  | 0,156586  | 0,147416  | 0,118402  |
| ID246907        |                       | 0,204214              | 0,194934  | 0,201673  | -2,235262 | 0,190637  | 0,185915  | 0,205035  | 0,237124  | 0,190336  | 0,232950  | 0,234994  | 0,215686  |
| ID1814733       |                       | 0,031924              | -0,085102 | -0,011261 | 0,332842  | -0,326725 | 0,028422  | 0,197612  | 0,241068  | 0,613754  | 1,420355  | -0,678212 | -1,409588 |
| ID2142601       |                       | 0,226370              | -1,016402 | 0,192510  | 0,199642  | 0,124908  | -1,011580 | 0,295899  | 0,252540  | 0,285586  | 0,235056  | 0,178333  | 0,095901  |

Table S-4: cluster 6

| ID <sup>1</sup> | Protein <sup>12</sup> |      | co_0 min  | co_30 min | co_60 min | co_24 h   | co_48 h   | co_72 h   | PI_0 min  | PI_30 min | PI_60 min | PI_24 h   | PI_48 h   | PI_72 h   |
|-----------------|-----------------------|------|-----------|-----------|-----------|-----------|-----------|-----------|-----------|-----------|-----------|-----------|-----------|-----------|
| ID3040913       | ACTG                  | ACTB | 0,753864  | 0,712502  | 1,314248  | 0,431628  | -0,079138 | -2,416702 | 0,395085  | 0,254275  | 0,283590  | -0,378370 | -0,794707 | -0,570869 |
| ID1313          |                       |      | 0,269022  | 0,274326  | 0,271772  | -1,038598 | 0,271677  | 0,274388  | 0,273923  | 0,284442  | 0,285647  | 0,236719  | -0,784585 | -0,819203 |
| ID338           |                       |      | 0,281330  | 0,286437  | 0,266512  | 0,306628  | -0,618197 | #DIV/0!   | 0,274854  | 0,292850  | 0,291764  | -1,037010 | 0,230018  | -0,692784 |
| ID2094921       |                       |      | 0,354500  | 0,593593  | 0,333224  | 0,138284  | -0,345830 | -1,628573 | 0,577581  | 0,303231  | 0,799029  | 0,394419  | -0,101658 | -1,319196 |
| ID360270        |                       |      | 1,072821  | 0,972601  | 1,446015  | 0,463309  | 0,066091  | -0,395625 | -1,281505 | 0,319539  | -1,425702 | 0,466645  | -0,783761 | -0,803767 |
| ID2447768       |                       |      | 0,587076  | 0,307201  | 0,094573  | -1,155578 | -0,450954 | 1,970987  | -0,577301 | 0,345571  | -0,537315 | -0,492092 | -0,195973 | -0,019219 |
| ID1712          |                       |      | 0,586357  | 1,141883  | 1,071931  | 0,286704  | 0,190969  | -0,952283 | -0,168881 | 0,347506  | 0,214998  | -0,761995 | -1,178761 | -0,968928 |
| ID2102478       |                       |      | 0,257804  | 0,439468  | 0,392120  | -1,455589 | 0,434225  | 0,182738  | -0,110959 | 0,359732  | 0,865696  | 0,527843  | -1,137682 | -0,623435 |
| ID1556          |                       |      | 0,536652  | 1,064015  | 1,449597  | -0,512212 | -0,551026 | -0,193889 | 0,537465  | 0,364854  | 0,247104  | -1,348723 | -1,042192 | -0,888826 |
| ID2108161       |                       |      | 0,311175  | 0,313953  | 0,312736  | -1,383941 | 0,314980  | 0,314213  | 0,301464  | 0,365731  | 0,303406  | 0,295137  | -0,879622 | -0,852669 |
| ID1472          |                       |      | 0,769019  | 1,153929  | 1,140232  | 0,138645  | -0,867921 | -1,460751 | 0,316149  | 0,381201  | 0,439001  | 0,731564  | -1,049350 | -1,508828 |
| ID1398          |                       |      | 0,191253  | 0,497479  | 0,549937  | -1,751959 | 0,423624  | 0,950405  | -0,674809 | 0,447810  | -0,554733 | -0,171183 | 0,308294  | -0,258912 |
| ID1700          |                       |      | -0,080796 | -0,146134 | -0,103117 | -0,142172 | -0,010027 | -0,160430 | -0,832252 | 0,451847  | -0,403896 | 0,840662  | 0,437103  | 0,359377  |
| ID75108         |                       |      | 0,120472  | 1,108755  | 0,804502  | 0,129196  | -0,392188 | -0,961860 | -0,140214 | 0,473511  | 0,669106  | -0,919414 | -0,789916 | -0,331804 |
| ID1135          |                       |      | 0,445480  | 0,299759  | 1,120503  | -0,085598 | -0,063570 | 0,315901  | -0,258379 | 0,474761  | 0,556626  | -1,292011 | -1,118675 | -0,717798 |
| ID1193          |                       |      | -0,425872 | -0,149617 | -0,607475 | 0,247747  | 0,134114  | -0,202793 | 1,464995  | 0,479883  | -0,438413 | -0,900816 | 0,192739  | 0,220247  |
| ID2093028       |                       |      | 0,090793  | 0,211905  | 0,012296  | -0,008110 | -0,222936 | -1,742673 | 0,581064  | 0,482427  | 1,367237  | -0,329029 | 0,337048  | -0,862277 |
| ID2305694       |                       |      | -0,261342 | 1,474095  | 0,381184  | 0,371004  | 0,229555  | -0,129428 | -0,168937 | 0,507680  | -0,798991 | -0,339258 | -0,330474 | -1,019902 |
| ID707           |                       |      | -0,112042 | 0,606786  | 0,282151  | 1,647626  | 0,516515  | -1,484677 | -0,030226 | 0,523410  | 0,309406  | -0,708145 | -0,650773 | -1,077069 |
| ID229688        |                       |      | -0,085347 | 1,170354  | -0,101412 | 0,402330  | -0,774346 | -1,315947 | 1,014706  | 0,652583  | -0,804651 | -0,021064 | 0,138532  | -0,281004 |
| ID1574          |                       |      | 0,410180  | 0,674523  | 1,959455  | -1,054710 | -0,581758 | -0,621294 | 0,217297  | 0,663396  | 0,619424  | -1,149529 | -0,679511 | -0,254992 |
| ID1028          |                       |      | 1,469621  | 0,626926  | 0,599170  | -1,018546 | -0,512931 | -1,376906 | 0,693638  | 0,771941  | 0,672024  | -0,466401 | -0,282199 | -1,292938 |
| ID331           |                       |      | 0,096967  | -0,613781 | 0,029335  | 0,277815  | 0,349236  | -0,989733 | 0,334954  | 0,796610  | 0,492800  | -0,807678 | 1,168558  | -1,337004 |
| ID1339          |                       |      | 0,447453  | 0,217752  | 0,211158  | 0,213729  | 0,091287  | 0,112017  | -0,121998 | 0,815823  | -0,364088 | -1,265780 | -0,365239 | -0,308559 |
| ID2096810       |                       |      | 0,403516  | 0,367724  | 0,233359  | 0,189785  | 0,122716  | -1,633221 | 0,328724  | 0,849303  | 0,421699  | 0,722536  | -0,543968 | -1,281539 |
| ID2439918       |                       |      | 0,027837  | 0,046550  | 0,072674  | 0,064432  | 0,191014  | -0,125467 | -0,236302 | 1,162986  | -0,434850 | -0,180885 | -0,301387 | -0,331824 |
| ID3763685       |                       |      | 0,234102  | 0,062842  | 0,111190  | 0,374921  | 0,342619  | -0,403992 | -0,869825 | 1,189885  | -0,686743 | -0,213312 | -0,021342 | -0,173674 |
| ID1871260       |                       |      | 0,152067  | -0,137078 | 0,713416  | 0,698646  | -0,148592 | -0,961356 | -0,099697 | 1,207755  | -0,018683 | -0,411292 | 0,349862  | -1,447871 |
| ID1340          |                       |      | -0,037142 | 0,002643  | -0,086031 | -0,271873 | 0,012915  | -0,305770 | 0,074650  | 1,246293  | -0,359290 | 0,288975  | -0,368056 | -0,125071 |
| ID3019322       |                       |      | 0,029473  | 0,202600  | 0,446690  | -0,091854 | -0,077915 | 0,489046  | -0,491633 | 1,263988  | 0,073095  | -1,285097 | -0,320694 | -0,558974 |
| ID1499          |                       |      | -0,053353 | 0,102482  | 0,381250  | -0,059597 | -0,052320 | -0,305947 | -0,048547 | 1,641922  | 0,133019  | -0,673222 | -0,433683 | -0,800309 |
| ID105671        | GRP78                 | ENPL | 0,954330  | 0,868652  | 1,220776  | -0,828463 | -0,879091 | -0,694866 | -0,503617 | 1,751938  | -0,530508 | 0,018452  | -1,120678 | -0,252313 |

Table S-4: cluster 7

| Cluster 7       |                       | Z-score <sup>13</sup> |          |           |           |          |           |           |           |           |           |           |           |           |
|-----------------|-----------------------|-----------------------|----------|-----------|-----------|----------|-----------|-----------|-----------|-----------|-----------|-----------|-----------|-----------|
| ID <sup>1</sup> | Protein <sup>12</sup> |                       | co_0 min | co_30 min | co_60 min | co_24 h  | co_48 h   | co_72 h   | PI_0 min  | PI_30 min | PI_60 min | PI_24 h   | PI_48 h   | PI_72 h   |
| ID493           | HNRL2                 | STRAP                 | 0,627728 | 0,703022  | 0,709499  | 1,051606 | 0,667518  | 0,378256  | -0,478784 | -2,343315 | -1,210590 | -0,662781 | 0,216786  | 0,175360  |
| ID305540        | HNRPC                 |                       | 0,668119 | 0,658948  | 0,995748  | 0,683949 | 0,601975  | -0,302383 | -0,844230 | -2,213401 | -1,095287 | 0,953825  | -0,079991 | 0,211185  |
| ID1366          |                       |                       | 0,403784 | 0,644011  | 0,441850  | 0,767723 | 0,878839  | 0,792502  | -0,860805 | -2,192453 | -1,129715 | -1,024480 | 0,337603  | 0,685020  |
| ID2964442       | HNRPC                 | HS90A                 | 0,714575 | 0,691123  | 1,026404  | 0,957198 | 0,599491  | -0,256590 | -1,004996 | -2,191490 | -1,112125 | 0,145956  | 0,149088  | 0,317855  |
| ID3931          | HS90A                 |                       | 1,024181 | 0,985751  | 0,848049  | 0,614785 | 0,304624  | 0,021352  | -1,038179 | -2,149873 | -1,356116 | 0,155700  | 0,574698  | 0,053955  |
| ID1534          |                       |                       | 0,654871 | 0,525784  | 1,350971  | 0,465167 | 0,962918  | 0,590981  | -0,447849 | -2,123196 | -0,300962 | -0,412845 | -0,528941 | -0,840111 |
| ID1267          | SGTA                  | SYAP1                 | 0,684014 | 0,842713  | 0,866538  | 0,804632 | 0,589302  | 0,644716  | -1,176807 | -2,095750 | -1,440975 | 0,103965  | 0,058123  | 0,145520  |
| ID1518          |                       |                       | 0,715873 | 0,614652  | 1,760789  | 0,495398 | -0,089602 | -0,298576 | -0,559900 | -2,075203 | -0,631953 | -0,194394 | -0,099076 | 0,313393  |
| ID929           | NP1L1                 |                       | 0,472365 | 0,908349  | 0,671950  | 1,187082 | 0,683102  | 0,366999  | -1,551640 | -2,068966 | -0,947594 | 0,326643  | -0,204499 | 0,237870  |
| ID1017          |                       | PEPD                  | 0,874991 | 0,561922  | 1,421464  | 0,309534 | 0,234028  | 0,662265  | -0,941201 | -2,057528 | -0,676999 | 0,567751  | -0,380464 | -0,433826 |
| ID3392731       | CNDP2                 |                       | 0,676176 | 0,802531  | 0,851123  | 0,941277 | 0,585051  | 1,219672  | -1,008906 | -2,041969 | -0,989358 | -0,538440 | -0,311511 | -0,320254 |
| ID104582        | ENPL                  |                       | 0,355662 | 1,279399  | 0,819268  | 0,324126 | 0,447755  | 1,013914  | -0,619556 | -2,038112 | -0,057001 | 0,663431  | -0,820457 | -1,202571 |
| ID936           | BASP                  | MPI, BPNT1            | 0,197063 | 0,835250  | 0,254955  | 0,992720 | 1,434359  | 0,920827  | -1,050429 | -2,031439 | -1,084655 | -0,380370 | -0,119374 | -0,063999 |
| ID1099          | CSN4                  |                       | 0,545964 | 0,896894  | 1,077212  | 0,951028 | 0,913250  | 0,422605  | -0,649553 | -2,017944 | -0,807850 | 0,579053  | -0,933634 | -0,832262 |
| ID1382          | EF1B                  |                       | 0,192779 | 0,858346  | 0,126755  | 1,696783 | 0,947324  | 0,189147  | -0,784411 | -1,980088 | -1,264170 | 0,626152  | -0,443032 | -0,009047 |
| ID1019          | IF4A1                 | ACTG, HNRPF, NUDC     | 0,722866 | 0,880364  | 1,095093  | 1,248401 | 0,663950  | -0,219396 | -1,146375 | -1,978949 | -1,035553 | 0,630541  | -0,244824 | -0,458482 |
| ID926           | NP1L1                 |                       | 0,622636 | 1,025689  | 0,746665  | 1,087216 | 0,898214  | 0,133886  | -1,374695 | -1,971618 | -0,974813 | 0,135878  | -0,472674 | -0,102414 |
| ID974           | SYDC                  |                       | 0,327720 | 0,641134  | 0,539564  | 1,697156 | 1,000461  | 0,170879  | -1,355442 | -1,946861 | -0,928316 | -0,216328 | 0,001487  | 0,014464  |
| ID878           | FKBP4                 | HMCS1, HNRPK          | 0,545080 | 1,024110  | 0,688823  | 1,526364 | 0,707379  | 0,380660  | -1,089902 | -1,929021 | -1,229707 | -0,049106 | -0,362822 | -0,224135 |
| ID985           |                       |                       | 0,259764 | 0,544212  | 0,701409  | 1,180323 | 1,352812  | 0,846764  | -0,879162 | -1,917728 | -1,299028 | -0,778152 | -0,072198 | -0,133554 |
| ID3228910       | SAKS1                 |                       | 0,608298 | 0,648070  | 0,595225  | 0,666571 | 0,308735  | 0,250144  | -1,711521 | -1,916799 | -1,056833 | 1,096174  | 0,201360  | 0,584621  |
| ID1312          | OTUB1                 | SAE1                  | 0,374256 | 0,401683  | 0,567452  | 1,143921 | 1,351355  | 0,932233  | -1,456146 | -1,912874 | -0,902731 | -0,497394 | -0,129062 | 0,002958  |
| ID2917416       |                       |                       | 0,432862 | 0,475883  | 0,586910  | 0,874668 | 0,766063  | 0,570529  | -1,356976 | -1,891774 | -1,270426 | -0,616295 | 0,642018  | 0,632466  |
| ID566           | PSMD2                 |                       | 0,497470 | 0,587671  | 0,706933  | 1,263641 | 0,813619  | 0,842948  | -1,284138 | -1,882671 | -1,326437 | -0,077873 | -0,341248 | 0,180615  |
| ID1152          | ARSA1                 | RCN1                  | 0,782641 | 0,800777  | 1,154849  | 0,669051 | 0,924582  | 0,910718  | -1,315410 | -1,875645 | -0,846006 | -0,733209 | -0,282271 | -0,373379 |
| ID1025          |                       |                       | 1,041879 | 1,000348  | 1,329365  | 0,701124 | 0,615921  | -0,495790 | -0,817559 | -1,859036 | -0,387832 | -0,220370 | -0,353727 | -0,609415 |
| ID2924537       |                       |                       | 0,360222 | 0,363995  | 1,070155  | 1,161163 | 0,710657  | -0,310996 | -1,257134 | -1,854951 | -1,389343 | 0,471145  | 0,173812  | 0,619061  |
| ID459           |                       | HNRPK                 | 0,381057 | 0,569151  | 0,350353  | 1,218240 | 1,057459  | 1,145217  | -0,982958 | -1,848300 | -1,284378 | -0,853021 | 0,023739  | 0,010186  |
| ID262545        |                       |                       | 0,621239 | 1,048365  | 1,162080  | 0,429555 | 1,157172  | 0,348698  | -0,677928 | -1,847171 | -0,865339 | -0,465999 | -0,459447 | -0,567724 |
| ID788           |                       |                       | 0,075089 | 0,703616  | 0,450114  | 1,031482 | 0,803292  | 1,416353  | -0,439242 | -1,833113 | -1,775180 | -0,171142 | 0,016573  | -0,320627 |
| ID1631          |                       | SUGT1                 | 0,191276 | 0,861387  | -0,053322 | 1,459567 | 1,276342  | 0,733182  | -1,381814 | -1,830800 | -0,499555 | -0,763232 | -0,207169 | 0,023329  |
| ID1214          |                       |                       | 0,682407 | 1,001028  | 0,627177  | 1,299882 | 0,706970  | 0,484406  | -1,207820 | -1,828141 | -1,391382 | 0,289520  | -0,388494 | -0,203172 |
| ID2816455       | HS90A                 |                       | 0,803786 | 0,863436  | 0,926851  | 0,906379 | 1,075052  | -0,502975 | -1,089294 | -1,821270 | -0,862607 | -0,098226 | -0,194436 | -0,031251 |
| ID1241          | PP2AB                 | CT077                 | 0,225754 | 0,725088  | 0,801043  | 1,633877 | 0,964487  | 0,655992  | -1,030579 | -1,819979 | -1,115046 | -0,408451 | -0,257453 |           |
| ID1203          | HNRPC                 |                       | 0,403104 | 0,509031  | 0,595016  | 1,139930 | 0,520255  | 1,173812  | -1,372046 | -1,819241 | -1,448193 | 0,355436  | -0,204843 | 0,236599  |
| ID2830369       |                       |                       | 0,949802 | 1,385808  | 0,912228  | 1,112177 | 0,533363  | -0,239419 | -0,948673 | -1,817473 | -0,874212 | -0,109445 | -0,577342 | -0,354175 |
| ID1304          | PCNA                  | CSN4                  | 0,364435 | 0,555473  | 0,501602  | 0,988399 | 1,370028  | 1,318715  | -1,188003 | -1,815887 | -0,876117 | -0,421183 | -0,209810 | -0,692947 |
| ID2818369       | P3H1                  |                       | 0,787239 | 0,994265  | 1,114915  | 0,956263 | 0,828269  | 0,089965  | -1,261429 | -1,812472 | -1,134296 | 0,057576  | -0,323789 | -0,282111 |
| ID871           | FKBP4                 |                       | 0,432793 | 0,912608  | 0,634281  | 1,173978 | 0,800662  | 0,921422  | -1,500427 | -1,806698 | -1,242953 | -0,112524 | -0,202620 | -0,038653 |
| ID1153          | TRA2B                 | ANXA2                 | 0,497241 | 0,840377  | 0,735820  | 1,001033 | 0,905369  | 0,875792  | -1,652277 | -1,800788 | -1,127542 | -0,176847 | -0,093363 | -0,049026 |
| ID1269          | TXNL1                 |                       | 0,634081 | 0,950541  | 0,421969  | 1,717879 | 0,863283  | 0,106911  | -1,288316 | -1,794368 | -0,879878 | 0,227145  | -0,362792 | -0,539669 |
| ID476           |                       |                       | 0,367204 | 0,610984  | 0,511194  | 1,353082 | 0,878006  | 0,833309  | -1,087894 | -1,793670 | -1,533736 | -0,374133 | -0,077616 | 0,219736  |
| ID3231778       |                       | PEA15                 | 0,476983 | 0,679976  | 0,651047  | 1,290426 | 0,824801  | 1,055594  | -1,065018 | -1,789489 | -1,293169 | -0,622350 | -0,415555 | 0,051166  |
| ID1784          |                       |                       | 0,625336 | 0,861371  | 0,533631  | 0,978086 | 0,949504  | 0,965896  | -1,864526 | -1,783864 | -0,629667 | -0,306107 | -0,239287 | -0,166899 |
| ID279386        | SET                   |                       | 0,070006 | 0,312854  | 0,485676  | 1,379692 | 1,036754  | 1,164922  | -1,156300 | -1,772729 | -1,351971 | -0,132239 | 0,042234  | -0,107458 |
| ID997           | PRS7                  | SH3G1                 | 0,459247 | 0,809162  | 0,668149  | 1,551122 | 0,945984  | 0,856654  | -0,742596 | -1,774782 | -1,115672 | -0,423596 | -0,762550 | -0,577021 |
| ID1797353       |                       |                       | 0,556658 | 0,707205  | 0,931521  | 0,863104 | 0,763842  | 0,517632  | -0,735039 | -1,764279 | -0,340087 | -0,381244 | -0,678447 | -0,536178 |
| ID13083         | TXND5                 |                       | 0,711830 | 0,920347  | 0,707922  | 0,801653 | 0,995502  | 0,984473  | -1,599898 | -1,759992 | -0,732267 | -0,536233 | -0,354860 | -0,272535 |
| ID435           | DREB                  | CSN4                  | 0,510588 | 0,767868  | 0,492399  | 1,459542 | 0,968520  | 0,915906  | -0,761574 | -1,757421 | -1,210581 | -0,948114 | -0,355457 | -0,318704 |
| ID17270         |                       |                       | 0,690768 | 0,889335  | 0,998869  | 0,750340 | 0,834652  | 1,041366  | -1,090252 | -1,754594 | -1,297446 | -0,738121 | -0,540730 | 0,031284  |
| ID1158          |                       |                       | 0,583231 | 0,776802  | 0,951242  | 1,017028 | 0,642416  | 0,346886  | -1,490478 | -1,748366 | -1,402270 | -0,003719 | 0,110052  | 0,216249  |
| ID428           | ICAL                  | DREB                  | 0,428824 | 0,713273  | 0,173273  | 1,474877 | 1,067572  | 1,078532  | -0,925412 | -1,746144 | -1,182892 | -0,765031 | -0,295604 | -0,174934 |
| ID1523          |                       |                       | 0,316662 | 0,493219  | 1,014868  | 0,946682 | 0,119008  | -1,090249 | -0,704773 | -1,744737 | -0,981414 | 1,976607  | 0,272442  | -0,124163 |
| ID379418        | MYG1                  |                       | 0,478961 | 0,935828  | 0,516016  | 1,182352 | 1,012436  | 0,971670  | -1,189042 | -1,744534 | -1,185933 | -0,847235 | -0,290615 | -0,051712 |
| ID1392          | PSME2                 | SHLB1                 | 0,639896 | 0,548117  | 0,980971  | 0,597345 | 1,155444  | 1,302591  | -1,293837 | -1,744285 | -1,089857 | -0,465757 | -0,299898 | -0,447170 |
| ID1105          |                       |                       | 0,598138 | 0,792909  | 0,631579  | 0,758244 | 0,934879  | 1,030974  | -1,676505 | -1,742497 | -1,006593 | -0,696830 | 0,028458  | 0,173037  |
| ID445851        | DNJA2                 |                       | 0,137967 | 0,647943  | 0,389054  | 1,305846 | 0,657249  | 0,853509  | -0,486057 | -1,734380 | -1,036682 | -0,081738 | -0,284970 | -0,388175 |

Table S-4: cluster 7

| ID <sup>1</sup> | Protein <sup>2</sup> |                     | co_0 min | co_30 min | co_60 min | co_24 h  | co_48 h   | co_72 h   | PI_0 min  | PI_30 min | PI_60 min | PI_24 h   | PI_48 h   | PI_72 h   |
|-----------------|----------------------|---------------------|----------|-----------|-----------|----------|-----------|-----------|-----------|-----------|-----------|-----------|-----------|-----------|
| ID357613        | SAE1                 | ACTG, TMOD3         | 0,754072 | 0,852076  | 0,883150  | 1,154350 | 0,960031  | 0,829986  | -0,666346 | -1,727219 | -1,322963 | -0,588424 | -0,584982 | -0,690838 |
| ID1818          | UBP14                |                     | 0,758152 | 0,870088  | 0,899250  | 1,012440 | 0,848810  | 0,774664  | -1,479367 | -1,726890 | -1,221585 | -0,339268 | -0,418688 | -0,062425 |
| ID1701          | STMN1                | 1433S               | 0,095998 | 0,668823  | 0,579117  | 1,604853 | 1,285645  | 0,727654  | -1,072386 | -1,725161 | -0,843658 | -0,301687 | -0,883980 | -0,210640 |
| ID1412          | PA1B2                | PSME1, DDAH2        | 0,318106 | 0,787583  | 0,683044  | 1,175495 | 1,218882  | 1,134520  | -1,182849 | -1,724245 | -0,459757 | -0,699339 | -0,841508 | -0,584767 |
| ID1268          | CHM4B                | RPB3                | 0,240095 | 0,947644  | 0,520337  | 1,374477 | 1,222893  | 0,569214  | -1,169769 | -1,721924 | -1,245963 | 0,145441  | -0,269764 | -0,576321 |
| ID1157          | SET                  |                     | 0,695495 | 1,035701  | 0,623141  | 1,253798 | 0,997339  | 0,869187  | -0,951440 | -1,716331 | -0,870657 | -0,466843 | -0,707331 | -0,878769 |
| ID485           | HS105                |                     | 0,398600 | 0,702727  | 0,452257  | 1,390898 | 1,020177  | 0,732700  | -1,193529 | -1,714648 | -1,562906 | -0,439798 | -0,068172 | 0,171744  |
| ID949           | RUVB2                | NEMO                | 0,510984 | 1,000116  | 1,103144  | 1,122212 | 0,786104  | 0,906778  | -0,460924 | -1,703116 | -0,776372 | -0,700109 | -1,063806 | -0,900039 |
| ID1769          | COTL1                |                     | 0,766211 | 1,150046  | 1,015078  | 1,035116 | 0,426369  | 0,372531  | -1,721511 | -1,698420 | -0,899980 | 0,077526  | -0,625040 | 0,121456  |
| ID402687        | TBA1B                |                     | 0,685154 | 0,776043  | 0,855367  | 1,001366 | 0,929069  | 1,174159  | -0,838207 | -1,696437 | -0,628786 | -0,478129 | -1,220912 | -0,678219 |
| ID1042          | SAHH                 |                     | 0,399717 | 0,479982  | 0,380349  | 1,134306 | 1,121091  | 1,162889  | -1,661951 | -1,695306 | -0,975736 | -0,567167 | -0,222685 | 0,302719  |
| ID136093        |                      |                     | 0,344319 | 0,378383  | 0,428265  | 1,235412 | 0,822111  | 1,178317  | -1,107851 | -1,693582 | -1,548496 | -0,087217 | -0,404302 | 0,432836  |
| ID575           | HS90A                |                     | 0,322791 | 0,590197  | -0,095027 | 1,540257 | 1,280614  | 0,633036  | -1,181988 | -1,690259 | -1,295069 | 0,144565  | -0,314973 | 0,101997  |
| ID559           | HS90A                | DP13A, SRC8         | 0,745476 | 1,103248  | 0,764141  | 1,227777 | 1,208645  | 0,240000  | -0,856982 | -1,689152 | -1,023877 | -0,423827 | -0,724722 | -0,676684 |
| ID51068         |                      |                     | 0,320851 | 0,883295  | 0,447891  | 0,961366 | 1,541309  | 0,860128  | -1,247197 | -1,686401 | -0,739740 | -0,203083 | -0,381669 | -0,807521 |
| ID545           | UBP5                 |                     | 0,449417 | 0,635266  | 0,457547  | 1,082312 | 1,099259  | 0,954487  | -1,618066 | -1,684291 | -1,220152 | -0,388752 | 0,024996  | 0,110791  |
| ID576           |                      |                     | 0,575424 | 0,503152  | 0,393329  | 1,373615 | 1,007105  | 0,565206  | -1,452621 | -1,684182 | -1,039319 | 0,117703  | -0,291251 | -0,038735 |
| ID2005865       |                      |                     | 0,641942 | 1,050369  | 0,545802  | 0,162945 | 1,365128  | 0,548730  | -1,280813 | -1,683264 | -0,029115 | -0,914828 | -0,614627 | -0,020976 |
| ID1494          | NDUS3                | HSPB1, PSB4         | 0,345819 | 0,859753  | 1,028823  | 1,505266 | 0,866165  | 0,596221  | -0,917295 | -1,681734 | -1,260443 | -0,271394 | -0,595003 | -0,544026 |
| ID798           | TCPE                 | PNCB, TCPQ, HDAC2   | 0,510229 | 0,784062  | 0,595826  | 1,437272 | 1,070769  | 0,676611  | -1,307180 | -1,678261 | -1,318183 | -0,183459 | -0,455418 | -0,178133 |
| ID469           | UBA1                 | TIF1B               | 0,618020 | 0,671381  | 0,584918  | 1,031357 | 1,220648  | 1,054576  | -0,885958 | -1,677660 | -1,393676 | -1,104558 | -0,280790 | -0,114398 |
| ID622           | GSPT1                | HS90A, ERF3B        | 0,607663 | 0,749844  | 0,561847  | 1,420910 | 1,016923  | 0,723101  | -1,326602 | -1,672407 | -1,266812 | -0,633305 | -0,332016 | -0,007473 |
| ID130985        |                      |                     | 0,557544 | 0,509946  | 0,616668  | 1,135271 | 1,068430  | 0,938106  | -0,854947 | -1,669280 | -1,441932 | -0,339739 | -0,277275 | -0,372726 |
| ID1077          | AHSA1                | ACTG, CSN4          | 0,642896 | 0,912737  | 1,036461  | 1,342840 | 0,562773  | 0,437827  | -1,668260 | -1,665237 | -0,874590 | 0,237452  | -0,544917 | -0,360620 |
| ID168476        |                      |                     | 0,006482 | 1,009724  | 0,958398  | 1,176938 | 1,028355  | 0,660516  | -0,953313 | -1,663269 | -0,998679 | -0,366782 | -0,869559 | -0,080506 |
| ID257339        |                      |                     | 0,508031 | 0,950818  | 0,737736  | 0,899481 | 1,225040  | 0,713487  | -1,223138 | -1,660567 | -0,845362 | -0,057702 | -0,473366 | -0,788884 |
| ID809           | ULA1                 |                     | 0,638858 | 0,567883  | 0,846302  | 1,010342 | 1,079452  | 1,009655  | -1,127387 | -1,656953 | -1,492611 | -0,671336 | -0,296238 | -0,075801 |
| ID1669          |                      |                     | 0,540639 | 0,911932  | 1,257733  | 0,630714 | 0,997717  | 0,082959  | -1,837060 | -1,656283 | -0,697069 | 0,288056  | -0,229819 | -0,217504 |
| ID1772          |                      |                     | 0,642930 | 1,370469  | 0,996422  | 0,987940 | 0,183343  | -0,053173 | -1,224799 | -1,648506 | -1,094091 | 0,699015  | -0,377346 | -0,307450 |
| ID484           |                      |                     | 0,476188 | 0,878256  | 0,487872  | 1,268899 | 0,831724  | 1,118821  | -1,074992 | -1,643239 | -1,503889 | -0,561347 | -0,351789 | -0,066841 |
| ID941           | CD2B2                |                     | 0,570502 | 0,107779  | 0,711406  | 0,866684 | 1,264231  | 0,841678  | -0,872314 | -1,641959 | -0,600298 | -0,316613 | -0,951349 | -1,028899 |
| ID1399          | 3HIDH                | PSME1, CDV3         | 0,742539 | 0,855008  | 1,039132  | 0,368676 | 1,098965  | 1,324662  | -1,237516 | -1,641109 | -0,783404 | -0,663458 | -0,538927 | -0,730433 |
| ID1000          |                      |                     | 0,257903 | 0,701229  | 0,269702  | 1,459484 | 1,407768  | 0,440453  | -1,511779 | -1,639631 | -0,933117 | -0,262538 | -0,241235 | -0,013875 |
| ID25129         |                      |                     | 0,191977 | 0,737930  | -0,110965 | 1,889248 | 1,134521  | -0,203242 | -1,101895 | -1,638624 | -0,478558 | -0,075809 | -0,257952 | -0,105583 |
| ID2286          |                      |                     | 0,117067 | 0,759780  | 0,697370  | 1,457241 | 0,808292  | 0,509066  | -0,879167 | -1,638304 | -0,643083 | 0,298587  | -0,736328 | -0,675875 |
| ID571           | HS90A                |                     | 0,857132 | 1,219287  | 0,924669  | 1,064507 | 0,994116  | -0,040819 | -0,914801 | -1,637035 | -0,985072 | -0,284924 | -0,460931 | -0,807361 |
| ID486           | HS105                |                     | 0,420962 | 0,706453  | 0,425241  | 1,523945 | 1,028784  | 0,661780  | -1,255072 | -1,630076 | -1,519802 | -0,359468 | -0,186859 | 0,094246  |
| ID1174          | IDH3A                |                     | 0,754144 | 1,322734  | 0,643621  | 1,237645 | 0,175788  | 0,976385  | -0,906133 | -1,628994 | -1,194918 | -1,101711 | -0,224323 | -0,329668 |
| ID1234          | TALDO                | PP1B, KPYM          | 0,724647 | 1,087263  | 0,910962  | 0,848168 | 0,660772  | 0,624779  | -1,602732 | -1,627301 | -1,269414 | -0,322719 | -0,325457 | 0,210352  |
| ID1359          |                      |                     | 0,426048 | 0,411247  | 0,894205  | 0,385377 | 1,043650  | 1,207187  | -1,530715 | -1,620764 | -1,027220 | -0,402047 | 0,075841  | 0,036678  |
| ID935           | RD23A                |                     | 0,252109 | 0,726269  | 0,419046  | 0,997883 | 1,608214  | 0,999143  | -1,378500 | -1,619155 | -0,913736 | -0,443692 | -0,281577 | -0,476927 |
| ID1402          | PSB7                 |                     | 0,418528 | 1,060886  | 0,948404  | 1,565751 | 0,742449  | 0,528724  | -0,950138 | -1,618481 | -1,126437 | -0,765004 | -0,747825 | -0,248108 |
| ID1106          | CAPG                 |                     | 0,342492 | 1,009323  | 0,705538  | 0,945956 | 1,010081  | 1,349036  | -1,172933 | -1,617635 | -0,820637 | -0,964792 | -0,736548 | -0,291079 |
| ID1167          | GLRX3                | TXNL2, SNAG, CPIN1  | 0,591179 | 0,884556  | 0,641792  | 1,292210 | 0,896487  | 0,931426  | -1,495727 | -1,616788 | -1,119052 | -0,554342 | -0,443447 | -0,146878 |
| ID477           | HS105                | GPIA1               | 0,299375 | 0,575272  | 0,414852  | 1,616015 | 1,080227  | 0,809848  | -1,085031 | -1,606009 | -1,528182 | -0,218610 | -0,371615 | -0,040796 |
| ID490           | HSP74                |                     | 0,319345 | 0,671047  | 0,313364  | 1,140084 | 1,027538  | 1,161472  | -1,388603 | -1,604501 | -1,452359 | -0,651445 | -0,011695 | 0,312892  |
| ID1161          | STRAP                |                     | 0,685239 | 0,824772  | 0,995858  | 1,329553 | 0,865156  | 0,593826  | -1,460590 | -1,600304 | -1,087773 | -0,586492 | -0,498264 | -0,207605 |
| ID1227          | ACTG                 |                     | 0,693354 | 0,995778  | 0,830317  | 1,346224 | 0,016035  | 1,125423  | -1,104468 | -1,598828 | -1,112070 | -0,327934 | -0,432217 | -0,513598 |
| ID172969        | PSA3                 | TPD54               | 0,411117 | 0,769076  | 0,641599  | 1,112480 | 0,916809  | 1,132387  | -1,392467 | -1,586881 | -1,410764 | -0,549246 | -0,338977 | 0,157554  |
| ID879           | HNRPK                | TBL1R, HMCS1, TBA3  | 0,467912 | 0,745880  | 0,494826  | 1,016355 | 1,057089  | 1,540503  | -1,234375 | -1,585841 | -0,739700 | -0,609342 | -0,824100 | -0,481544 |
| ID793           | TCPA                 |                     | 0,509824 | 0,909062  | 0,597757  | 1,408988 | 1,015335  | 0,573268  | -1,459707 | -1,582601 | -1,319709 | -0,496170 | -0,279352 | -0,000738 |
| ID1196          | IF2A                 |                     | 0,551415 | 0,926903  | 0,854586  | 1,467490 | 0,869614  | 0,780475  | -1,043556 | -1,579205 | -1,050558 | -0,741401 | -0,775403 | -0,445710 |
| ID176254        | PDIAB                | F10A1, PABP2, PRS6B | 0,448488 | 1,214205  | 0,648548  | 0,919924 | 1,009795  | 1,039563  | -1,216586 | -1,576322 | -1,085798 | -0,302023 | -0,605933 | -0,569367 |
| ID149908        |                      |                     | 0,178507 | 0,749966  | 0,134293  | 1,265036 | 0,887474  | 1,371909  | -1,456351 | -1,575265 | -0,907433 | -0,436881 | -0,348394 | 0,027918  |
| ID1465          | IF6                  |                     | 0,378340 | 1,011514  | 0,226969  | 1,751426 | 0,688340  | 0,244935  | -1,573401 | -1,570124 | -0,869485 | -0,430923 | -0,409428 | 0,444106  |
| ID1258          | NACA                 |                     | 0,359951 | 0,740493  | 1,014484  | 0,708657 | 0,216510  | -0,348677 | -0,612803 | -1,567537 | -1,065584 | 1,691518  | -0,195130 | -0,519003 |
| ID2926520       |                      |                     | 0,434202 | 0,548275  | 0,982091  | 0,704512 | -0,189514 | -0,711992 | -0,167206 | -1,566016 | -1,686839 | 0,421277  | -0,018102 | 1,354630  |
| ID1430          | 1433Z                |                     | 0,473485 | 0,638927  | 1,075699  | 0,838151 | 0,942268  | 1,289309  | -1,548059 | -1,564505 | -0,785948 | -0,529985 | -0,631184 | -0,330656 |
| ID1355          | MARE1                | EFHD2               | 0,592040 | 1,130689  | 0,969452  | 1,230576 | 0,744012  | 0,504565  | -1,697985 | -1,542941 | -0,758866 | -0,002114 | -0,621796 | -0,548161 |

Table S-4: cluster 7

| ID <sup>1</sup> | Protein <sup>12</sup> |                     | co_0 min  | co_30 min | co_60 min | co_24 h  | co_48 h  | co_72 h   | PI_0 min  | PI_30 min | PI_60 min | PI_24 h   | PI_48 h   | PI_72 h   |
|-----------------|-----------------------|---------------------|-----------|-----------|-----------|----------|----------|-----------|-----------|-----------|-----------|-----------|-----------|-----------|
| ID1125          |                       |                     | 0,700702  | 0,562436  | 1,345976  | 1,089259 | 0,596651 | 0,809839  | -0,667243 | -1,541475 | -1,260666 | -1,204386 | -0,491102 | -0,241088 |
| ID954           | PSMD5                 | SH3G1               | 0,938625  | 0,622875  | 1,366572  | 0,775534 | 1,019775 | 0,655459  | -0,761049 | -1,541367 | -0,553371 | -1,471959 | -0,738804 | -0,680278 |
| ID1002          | PRS6A                 |                     | 0,433778  | 0,994169  | 0,617109  | 1,402992 | 0,950406 | 0,772917  | -0,836732 | -1,537794 | -1,465768 | 0,184258  | -0,742212 | -0,727059 |
| ID23159         |                       |                     | 0,468823  | 0,600590  | 0,410332  | 1,272952 | 1,392393 | 0,369576  | -0,272498 | -1,525951 | -1,458467 | 0,581681  | -0,605568 | -1,084812 |
| ID1165          | CNN3                  |                     | -0,030656 | 0,306818  | 0,283095  | 0,678113 | 1,393133 | 0,792327  | -0,644561 | -1,526549 | -1,639065 | -0,137276 | -0,458817 | -0,050881 |
| ID131133        |                       |                     | 0,397142  | 0,440605  | 0,474424  | 1,190070 | 1,281585 | 1,336707  | -0,904126 | -1,525341 | -1,344724 | -0,391165 | -0,417043 | -0,635926 |
| ID283779        |                       |                     | 0,439315  | 0,716263  | 0,595784  | 1,161291 | 0,799694 | 1,373211  | -0,625863 | -1,524779 | -0,747110 | -0,197741 | -1,245037 | -0,794463 |
| ID890           | TBA1B                 |                     | 0,429447  | 0,573079  | 0,557983  | 0,764732 | 1,151352 | 1,542956  | -1,417302 | -1,522854 | -1,026679 | -0,859645 | -0,529244 | 0,121265  |
| ID534785        | PP1A                  |                     | 0,697427  | 1,047093  | 1,041974  | 0,971123 | 0,625824 | 0,872165  | -1,632956 | -1,514793 | -1,025132 | -0,593023 | -0,438856 | -0,199102 |
| ID508           | MSH2                  | GANAB               | 0,578279  | 0,499826  | 0,567799  | 1,150298 | 1,294283 | 1,235048  | -1,124347 | -1,512322 | -1,260302 | -0,781578 | -0,343880 | -0,498499 |
| ID302775        | DCTN2                 | PABP2, PRS6A        | 0,670011  | 0,920489  | 0,844380  | 1,317667 | 0,847518 | 0,800625  | -1,224270 | -1,512185 | -1,233921 | -0,236275 | -0,684676 | -0,568434 |
| ID1501          | TCTP                  | CBX1                | 0,683735  | 1,515529  | 0,862262  | 1,460095 | 0,430989 | -0,376412 | -0,903024 | -1,510187 | -0,588898 | 0,467813  | -0,962858 | -0,962091 |
| ID1541          | PRDX2                 | GSTP1               | 0,623370  | 0,829641  | 0,680439  | 0,811610 | 0,889636 | 1,103667  | -1,531834 | -1,499943 | -1,609637 | -0,336738 | -0,042635 | -0,001760 |
| ID1536          | SFRS3                 |                     | 0,540825  | 0,654682  | 0,792415  | 0,729543 | 1,195783 | 0,930829  | -1,888990 | -1,498388 | -0,965431 | 0,101730  | -0,307075 | -0,260491 |
| ID4295          | P3H1                  |                     | 0,792578  | 1,230483  | 1,256644  | 0,735421 | 0,573148 | 0,272571  | -0,914838 | -1,497832 | -0,982986 | 0,633423  | -0,962690 | -0,977566 |
| ID940           | GDIB                  |                     | 0,571290  | 0,660771  | 0,729531  | 1,151725 | 1,136931 | 0,973254  | -1,557996 | -1,497025 | -1,116230 | -0,631590 | -0,402120 | -0,176437 |
| ID3760248       |                       |                     | 0,649736  | 0,651985  | 0,792329  | 1,150725 | 1,007557 | 0,856943  | -1,627340 | -1,494042 | -1,276670 | -0,373103 | -0,249222 | -0,182172 |
| ID1360          | MARE1                 | TBCB, ANXA5         | 0,572519  | 1,091482  | 0,878147  | 1,040400 | 0,803976 | 0,960526  | -1,697128 | -1,492993 | -0,804844 | -0,237372 | -0,647992 | -0,526063 |
| ID2788379       |                       |                     | 0,317131  | 0,413271  | 0,208081  | 1,384203 | 1,328738 | 1,304494  | -1,002010 | -1,492874 | -1,333337 | -0,303745 | -0,406595 | -0,493293 |
| ID491           | HSP74                 |                     | 0,625955  | 0,987357  | 0,589018  | 1,283566 | 1,055868 | 0,630285  | -1,341924 | -1,492661 | -1,360425 | -0,858526 | -0,321111 | -0,012032 |
| ID1513          | GDIR1                 | LGUL                | 0,478386  | 0,894908  | 0,732590  | 1,110929 | 0,977630 | 1,042264  | -1,783106 | -1,492374 | -0,805833 | -0,275722 | -0,462250 | -0,486353 |
| ID1283          |                       |                     | 0,435741  | 0,972378  | 0,392196  | 1,236593 | 1,076926 | 0,786404  | -1,351974 | -1,490944 | -1,032876 | -0,339460 | -0,141938 | -0,627911 |
| ID1519          | PSD10                 |                     | 0,347966  | 0,792468  | 0,674642  | 1,078236 | 0,978140 | 0,940780  | -1,794779 | -1,490526 | -0,891860 | 0,020012  | -0,437640 | -0,212437 |
| ID1185          | IF32                  | NPM                 | 0,072169  | 0,881022  | 0,233656  | 1,967594 | 0,590366 | 0,180806  | 0,065826  | -1,489738 | -1,688282 | 0,103866  | -0,800263 | -0,091056 |
| ID1409          | PSME2                 | CLIC4               | 0,596694  | 0,628256  | 0,964203  | 0,883562 | 1,064185 | 1,039902  | -1,730853 | -1,489542 | -1,109362 | -0,467730 | -0,394889 | -0,101358 |
| ID1568          |                       |                     | 0,624237  | 0,843850  | 0,766425  | 0,878012 | 0,632942 | 0,609773  | -2,075217 | -1,483979 | -0,720939 | -0,562974 | -0,297098 | 0,644225  |
| ID165075        |                       |                     | -0,292476 | 1,084889  | 0,301605  | 1,150833 | 1,174689 | 0,396067  | -1,437998 | -1,481245 | -0,880716 | 0,240394  | -0,392942 | 0,196999  |
| ID1005          | RINI                  |                     | 0,502942  | 0,653271  | 0,548346  | 1,188442 | 1,198254 | 0,877037  | -1,786439 | -1,479971 | -0,981373 | -0,780161 | -0,244319 | 0,108931  |
| ID16834         |                       |                     | 0,171634  | 0,526788  | 0,535919  | 1,265750 | 1,004838 | 1,102185  | -1,487425 | -1,479640 | -1,013506 | -0,453045 | -0,127206 | -0,159554 |
| ID550           | UBP5                  | P3H1                | 0,759769  | 0,974594  | 0,809857  | 1,095984 | 0,952131 | 0,852655  | -1,435300 | -1,476889 | -1,123291 | -0,814230 | -0,414556 | -0,384280 |
| ID466           | UBE1                  | MVP, UBA1           | 0,624949  | 0,753311  | 0,582314  | 1,266232 | 1,135110 | 0,927741  | -1,141162 | -1,476433 | -1,284689 | -1,146225 | -0,346723 | -0,180982 |
| ID573           | HS90A                 |                     | 0,559572  | 1,549033  | 0,404105  | 1,216387 | 0,516584 | -0,168961 | -0,859216 | -1,475406 | -0,714799 | -0,074698 | -0,637198 | -0,334076 |
| ID1101          |                       |                     | 0,765858  | 0,858677  | 0,914225  | 0,874117 | 1,012889 | 0,930296  | -1,422577 | -1,473631 | -1,201909 | -1,023674 | -0,308998 | -0,181192 |
| ID1419          | TIF1B                 | 1433G               | 0,731239  | 0,931062  | 1,208893  | 0,730983 | 0,904303 | 0,954577  | -1,497076 | -1,469783 | -0,873276 | -0,462301 | -0,688053 | -0,586143 |
| ID1243          | PPP6                  | LDHB, PDXK          | 1,055931  | 0,926759  | 1,431911  | 0,541892 | 0,609454 | 0,922770  | -1,553557 | -1,467421 | -0,936359 | -0,499963 | -0,674625 | -0,251285 |
| ID1632          | NDKA                  | COMD1, SODC         | 0,571859  | 0,842178  | 0,762620  | 1,323650 | 0,650985 | 0,463894  | -1,987942 | -1,466556 | -1,034405 | 0,319127  | -0,427210 | 0,061580  |
| ID1124          |                       |                     | -0,353721 | 1,454359  | 0,521731  | 0,960475 | 0,354296 | 0,674346  | -1,283626 | -1,461955 | -0,726661 | -0,281400 | -0,291780 | 0,363584  |
| ID1154          | CNN3                  | IDH3A               | 0,736554  | 1,251095  | 0,755502  | 1,323704 | 0,598699 | 0,761148  | -1,030951 | -1,455672 | -1,083673 | -1,351775 | -0,447644 | -0,394931 |
| ID958           | CDC37                 | PRS6B, DCTN2, PDIA6 | 0,630479  | 1,000963  | 0,941831  | 1,210531 | 0,928449 | 0,852458  | -1,173131 | -1,454815 | -1,124977 | -0,717316 | -0,689146 | -0,584654 |
| ID1372          | TPM3                  | TPM4, TPM1, TPM2    | 0,755669  | 1,017263  | 1,042898  | 0,842881 | 1,036623 | 0,748091  | -0,974370 | -1,453969 | -0,778215 | -1,509015 | -0,659008 | -0,446102 |
| ID4476          |                       |                     | 0,871185  | 1,131889  | 0,817965  | 1,071593 | 0,876479 | 0,707290  | -1,275189 | -1,452978 | -1,069460 | -0,597403 | -0,636545 | -0,594175 |
| ID1429          | 1433T                 | 1433Z               | 0,701933  | 0,759051  | 1,041584  | 0,950664 | 0,987414 | 1,063824  | -1,503745 | -1,430113 | -0,898821 | -0,670979 | -0,699377 | -0,469180 |
| ID859           | TBA1B                 | TBA1C, VIME, TBA3   | 0,792958  | 0,559568  | 0,515293  | 0,956610 | 1,080950 | 1,435560  | -1,406289 | -1,426547 | -1,001938 | -0,573669 | -0,593313 | -0,482600 |
| ID1151          |                       |                     | 0,799401  | 1,715774  | 0,674815  | 0,387233 | 0,168161 | 0,701779  | -0,659526 | -1,421335 | -0,220123 | 0,066914  | -0,754221 | -1,442413 |
| ID1083          | SPS1                  |                     | 0,713669  | 1,220812  | 0,967862  | 0,944558 | 0,626987 | 1,008567  | -1,311742 | -1,417263 | -1,180040 | -0,685910 | -0,626138 | -0,432839 |
| ID1571          |                       |                     | 0,171864  | 0,752648  | 0,171480  | 1,514389 | 1,281079 | 1,147936  | -1,295883 | -1,411510 | -0,952450 | -0,544754 | -0,427182 | -0,543806 |
| ID1505          |                       |                     | 0,681706  | 1,042354  | 0,985919  | 1,001600 | 0,823279 | 0,627370  | -1,898638 | -1,410496 | -0,793911 | -0,077094 | -0,607998 | -0,393364 |
| ID574           | HS90A                 | HS90B               | 0,705849  | 1,546983  | 0,802266  | 0,812340 | 0,567688 | 0,104656  | -1,469146 | -1,409309 | -0,981515 | -0,155464 | -0,463414 | -0,099798 |
| ID956           | SNX6                  | HNRH1               | 0,410388  | 0,863024  | 0,537451  | 1,221748 | 1,161872 | 1,115474  | -1,321135 | -1,402771 | -1,133472 | -1,043375 | -0,512594 | -0,157454 |
| ID408351        | SHLB2                 | AL9A1               | 0,360133  | 0,750083  | 0,486143  | 1,104932 | 0,755928 | 1,393015  | -1,364993 | -1,402236 | -0,835881 | -0,240630 | -0,786771 | -0,279879 |
| ID960           | GSHB                  |                     | 0,595033  | 1,106384  | 0,857891  | 0,782259 | 0,905873 | 1,098722  | -1,574625 | -1,392294 | -1,174895 | -0,717186 | -0,408530 | -0,257929 |
| ID1168          | CNN3                  |                     | 0,048243  | 0,507649  | 0,218965  | 1,883351 | 1,187684 | 0,887557  | -0,863934 | -1,392257 | -1,390965 | -0,437178 | -0,590415 | -0,167995 |
| ID1425          | 1433G                 |                     | 0,872272  | 1,101224  | 0,261592  | 0,885532 | 0,782452 | 0,578039  | -1,320411 | -1,391482 | -1,005976 | -0,610824 | -0,835845 | -0,514281 |
| ID1240          | IF31                  | ANXA2, HDGF, TPM2   | 0,981907  | 1,264442  | 1,194078  | 0,872742 | 0,464824 | 0,685742  | -1,329738 | -1,391396 | -1,050267 | -0,430816 | -0,648024 | -0,721199 |
| ID21718         | HS90A                 |                     | 0,474253  | 0,716728  | 0,488029  | 1,525784 | 0,671262 | 0,675858  | -1,266016 | -1,380281 | -1,496653 | 0,122713  | -0,230373 | -0,270626 |
| ID1449          | 1433B                 | 1433G, TIF1B        | 0,946532  | 1,109824  | 1,251995  | 0,536748 | 0,614169 | 1,064472  | -1,209438 | -1,377428 | -0,509046 | -0,658608 | -0,884537 | -1,049336 |
| ID1321          | OTUB1                 |                     | 0,918455  | 1,224811  | 1,297707  | 0,510122 | 0,938980 | -0,279991 | -1,300835 | -1,375188 | -0,783220 | -0,295786 | -0,296220 | -0,632781 |
| ID1300          | IPYR                  |                     | 0,399281  | 0,949485  | 0,516783  | 0,841377 | 0,711401 | 1,500168  | -1,921647 | -1,368231 | -0,677411 | -0,764025 | -0,277994 | -0,100194 |
| ID395           | LPPRC                 |                     | 0,480377  | 0,681538  | 0,660868  | 1,276794 | 1,229224 | 1,058927  | -0,709279 | -1,367795 | -0,965692 | -0,149620 | -1,234397 | -0,988351 |

Table S-4: cluster 7

| ID <sup>1</sup> | Protein <sup>12</sup> |              | co_0 min  | co_30 min | co_60 min | co_24 h  | co_48 h   | co_72 h   | PI_0 min  | PI_30 min | PI_60 min | PI_24 h   | PI_48 h   | PI_72 h   |
|-----------------|-----------------------|--------------|-----------|-----------|-----------|----------|-----------|-----------|-----------|-----------|-----------|-----------|-----------|-----------|
| ID1030          | PP1R7                 | IF4A1        | 0,630265  | 0,926245  | 0,794258  | 0,903414 | 1,116783  | 1,054256  | -1,484200 | -1,358641 | -1,220530 | -0,772142 | -0,396565 | -0,386177 |
| ID643           | FKB10                 | DC112        | 0,714990  | 1,437985  | 0,817208  | 0,946789 | 0,434523  | 0,726984  | -1,356224 | -1,357544 | -1,223833 | 0,156207  | -0,558181 | -0,699853 |
| ID177384        | PR56A                 | TXND5        | 0,660731  | 1,176653  | 1,117196  | 1,008724 | 0,835972  | 0,441342  | -1,104616 | -1,345514 | -1,406025 | -0,234917 | -0,557073 | -0,651202 |
| ID1438          | 1433S                 |              | 0,332834  | 0,629829  | 0,434521  | 1,287889 | 1,312445  | 1,277428  | -1,516540 | -1,344526 | -0,832241 | -0,456996 | -0,594350 | -0,644543 |
| ID1709          |                       |              | 0,420424  | 0,771759  | 0,292764  | 1,312541 | 1,2271561 | 1,277301  | -1,416946 | -1,342507 | -0,729382 | -0,382282 | -0,823394 | -0,697409 |
| ID1641          | COF1                  |              | 0,792181  | 0,853551  | 0,712947  | 1,114161 | 0,997202  | 1,022810  | -1,375781 | -1,342169 | -0,717526 | -0,380057 | -1,001731 | -0,770603 |
| ID83022         |                       |              | 0,990778  | 1,143249  | 1,271976  | 0,473423 | 0,506057  | 1,025734  | -0,975610 | -1,340858 | -0,690288 | -0,572505 | -0,982456 | -0,992626 |
| ID15652         | ENOG                  |              | 0,236551  | 0,625219  | 0,528796  | 0,983870 | 1,091307  | 1,179281  | -1,863743 | -1,332877 | -1,320372 | -0,169967 | 0,033201  | -0,033759 |
| ID518           | ACTN4                 | ERO1A        | 0,698424  | 0,821214  | 0,852061  | 1,268140 | 1,191806  | 0,734137  | -0,976948 | -1,329658 | -1,107674 | -1,169283 | -0,828008 | -0,446532 |
| ID1140          | PSD13                 |              | 1,042932  | 0,853816  | 1,543177  | 0,476588 | 0,668751  | 0,847727  | -0,419176 | -1,322695 | -0,949237 | -1,146037 | -1,105196 | -0,777161 |
| ID1291          | IPYR                  | GBB1, GBB2   | 0,503708  | 0,957403  | 0,520901  | 1,345844 | 0,934988  | 0,715800  | -1,957815 | -1,318690 | -0,871017 | -0,014513 | -0,585243 | -0,234993 |
| ID2944561       |                       |              | 0,745801  | 1,168888  | 0,413288  | 1,137240 | 0,234901  | -0,794058 | -1,359235 | -1,315657 | -0,512724 | 0,368551  | 0,640770  | -0,635628 |
| ID1204          | CAZA1                 | NPM          | 0,133029  | 0,915468  | 0,590962  | 1,798237 | 0,628452  | 0,951012  | -1,044875 | -1,313270 | -1,167323 | -0,225476 | -0,957305 | -0,365279 |
| ID1070          | ACTB                  |              | 0,859210  | 1,029842  | 1,260074  | 1,403655 | 0,026037  | 0,059429  | -1,222364 | -1,313165 | -0,894087 | -0,697453 | -0,248702 | -0,436839 |
| ID3762259       |                       |              | 0,830580  | 0,679926  | 0,646677  | 1,039069 | 0,983321  | 0,733567  | -1,684704 | -1,310388 | -1,277963 | 0,388323  | -0,564155 | -0,367173 |
| ID507           | ACTN4                 | HS105        | 0,834549  | 0,832774  | 0,959275  | 1,188260 | 1,211560  | 0,572606  | -0,995744 | -1,304174 | -1,069723 | -1,157231 | -0,835627 | -0,525833 |
| ID1962730       | LEG1                  |              | 0,155300  | 0,711952  | 0,480398  | 0,992216 | 1,240642  | 0,711006  | -1,180489 | -1,303802 | -1,177407 | -1,436548 | -0,543329 | 0,990925  |
| ID1378          | CLIC1                 |              | 0,701203  | 0,917069  | 1,000174  | 0,995244 | 0,844781  | 0,728771  | -1,954147 | -1,302321 | -0,977520 | -0,228069 | -0,564541 | -0,217661 |
| ID1231          | HDGF                  |              | 0,954990  | 1,145871  | 0,713828  | 1,137481 | 0,429601  | 0,329527  | -1,618900 | -1,295485 | -1,175649 | -0,627865 | -0,097327 | -0,053039 |
| ID638           | MSH2                  |              | 0,223588  | 0,627298  | 0,223588  | 0,348234 | 0,346045  | 1,232310  | -1,099945 | -1,294628 | -0,983166 | -0,385667 | 0,633364  | -0,688958 |
| ID3150          | TBB3                  | TBB2C        | 0,471498  | 0,794169  | 0,481182  | 1,254175 | 0,767744  | 0,773413  | -1,900008 | -1,280155 | -1,376787 | 0,523567  | 0,007215  | -0,385121 |
| ID1457          |                       |              | 0,415516  | 0,706394  | 0,972624  | 0,875712 | 0,910355  | 1,446035  | -1,517528 | -1,279981 | -0,947543 | -0,900093 | -0,643531 | -0,262984 |
| ID875           | TBB2C                 | TBB3, TBB5   | 0,707634  | 0,581108  | 0,356686  | 1,228907 | 1,356474  | 0,821144  | -1,622612 | -1,276776 | -0,918997 | -0,930073 | -0,162378 | -0,373637 |
| ID201269        | UQCR1                 | HNRPK, RUVB2 | 1,036706  | 0,892535  | 1,198351  | 0,673065 | 0,679899  | 0,610417  | -1,537333 | -1,261227 | -1,193691 | -0,267144 | -0,517695 | -0,380669 |
| ID2838327       |                       |              | 0,578486  | 1,479355  | 0,700211  | 1,054744 | 0,509886  | -0,044534 | -1,285120 | -1,260883 | -1,050915 | -0,114690 | -0,427444 | -0,167769 |
| ID300154        |                       |              | 0,530294  | 1,411869  | 0,478112  | 1,183898 | 1,198329  | 0,520331  | -1,204605 | -1,260771 | -1,054766 | -0,720622 | -0,632432 | -0,629793 |
| ID2382844       | PPM1G                 |              | 0,631204  | 0,503867  | 0,678005  | 1,100176 | 1,323879  | 0,981071  | -1,207914 | -1,256171 | -0,899655 | -0,062802 | -0,484923 | -1,322436 |
| ID1223          |                       |              | 0,908389  | 0,994342  | 0,893918  | 0,783569 | -0,338900 | 0,403335  | -1,050051 | -1,227112 | -1,360075 | 0,751165  | -1,072425 | 0,501636  |
| ID3597623       |                       |              | 0,137759  | 0,644878  | 0,638069  | 1,183860 | 0,816688  | 0,639522  | -1,982044 | -1,197787 | -1,144830 | 0,491532  | -0,516352 | 0,411589  |
| ID1735          |                       |              | -0,169483 | 0,386651  | 1,044190  | 0,905869 | 1,393605  | 0,628696  | -1,394363 | -1,196609 | -1,326548 | -0,935261 | 0,032897  | 0,396541  |
| ID409           | MATR3                 |              | 0,293290  | 0,690198  | 0,448186  | 1,033655 | 0,962531  | 1,548516  | -0,754012 | -1,195712 | -1,231729 | 0,474060  | -1,016761 | -1,133707 |
| ID3762560       |                       |              | 0,876715  | 1,096740  | 0,865051  | 1,197829 | 0,788878  | 0,294520  | -0,371203 | -1,183300 | -0,976732 | -0,200178 | -1,669685 | -0,768679 |
| ID1516          | GSTP1                 |              | 0,433259  | 0,831234  | 0,773702  | 0,922838 | 0,965002  | 1,311901  | -1,919695 | -1,179452 | -0,870008 | -0,609505 | -0,556230 | -0,255424 |
| ID1403          | 1433E                 |              | 0,855320  | 1,026177  | 1,175679  | 0,620846 | 0,775629  | 1,115995  | -1,049192 | -1,177895 | -0,511947 | -0,944336 | -1,077337 | -1,045024 |
| ID2723          |                       |              | 0,730716  | 1,339014  | 1,074830  | 0,845970 | 0,547221  | 0,560220  | -1,958155 | -1,176270 | -0,850255 | -0,294627 | -0,712773 | -0,179547 |
| ID1703          | HSB11                 |              | 0,166985  | 0,868734  | 0,547181  | 1,235401 | 0,826666  | 0,589216  | -2,043954 | -1,167377 | -0,965775 | 0,230592  | -0,329921 | 0,099900  |
| ID1351          | ANXA3                 | CAPZB, IPYR  | 0,735185  | 1,086186  | 1,000412  | 1,127337 | 1,027293  | 0,701077  | -1,210231 | -1,160229 | -1,093428 | -1,049402 | -0,873122 | -0,553428 |
| ID1001          | ENOG                  |              | 0,420184  | 0,820743  | 0,628295  | 0,959232 | 1,161099  | 1,290815  | -1,703034 | -1,155745 | -0,943120 | -1,063128 | -0,393526 | -0,287596 |
| ID1121          | SPSY                  | ARSA1        | 0,872182  | 0,929789  | 1,321113  | 0,888462 | 0,842009  | 0,652447  | -1,632613 | -1,149680 | -0,832968 | -0,953669 | -0,756873 | -0,418615 |
| ID1233          |                       |              | 0,917858  | 1,297584  | 0,851944  | 1,361447 | 0,612908  | 0,054542  | -1,138106 | -1,143688 | -0,631506 | 0,046775  | -1,122849 | -1,095216 |
| ID959           | KAP0                  | TXND5        | 0,986582  | 1,379051  | 1,537371  | 0,445136 | 0,383416  | 0,366675  | -0,606174 | -1,139793 | -0,625448 | -0,877790 | -0,981255 | -1,087219 |
| ID1281          |                       |              | 0,655202  | 0,883699  | 0,594658  | 0,742389 | 0,170788  | 0,854152  | 0,397524  | -1,130636 | -2,101630 | 0,148412  | -0,444632 | -0,732822 |
| ID777           | LKHA4                 |              | 0,776295  | 0,652675  | 1,385246  | 0,735656 | 0,614273  | 0,832084  | -1,776791 | -1,129540 | -1,256116 | 0,127489  | -0,231901 | -0,697499 |
| ID1495          | GRB2                  |              | 0,173809  | 0,988286  | 0,378281  | 1,802545 | 0,880035  | 0,481831  | -1,629723 | -1,129509 | -0,510179 | 0,274906  | -0,738796 | -0,902760 |
| ID1308          | LZTL1                 | SFRS1, SPEE  | 0,787997  | 1,036546  | 0,857400  | 1,479394 | 0,703764  | 0,605238  | -1,585743 | -1,121027 | -0,893628 | -0,641395 | -0,826689 | -0,562206 |
| ID4596          | GANAB                 |              | 0,525286  | 0,801116  | 0,109905  | 1,173325 | 0,985526  | 1,321381  | -1,607320 | -1,116980 | -1,319601 | -0,518480 | -0,464263 | -0,019514 |
| ID306795        | SET                   | HDGF         | 0,548646  | 0,856676  | 0,787185  | 0,961714 | 1,288352  | 0,498900  | -1,347174 | -1,101208 | -0,993312 | -1,629628 | 0,040649  | -0,309105 |
| ID955           | PSMD5                 | SH3G1        | 0,513454  | 0,863044  | 0,583833  | 1,244629 | 1,141611  | 0,881659  | -1,651125 | -1,096621 | -0,007284 | -0,985708 | -0,661953 | -1,071965 |
| ID1316          | PP4C                  | EF1D         | 0,859238  | 1,912981  | 0,696257  | 0,234587 | 0,690649  | 1,602225  | -0,699432 | -1,092325 | -0,961739 | 0,191593  | -1,024010 | -0,920126 |
| ID942           | DCTN2                 | PABP2        | 0,684428  | 1,308093  | 0,178625  | 0,805108 | 0,772706  | 0,931667  | -0,955515 | -1,081735 | -1,199374 | -0,453896 | -1,032591 | -0,970990 |
| ID137923        |                       |              | 0,784597  | 0,418916  | 0,311076  | 0,031629 | 0,387031  | 1,866654  | -0,450184 | -1,066515 | -1,604230 | 0,457248  | -0,500089 | -0,521821 |
| ID1401          | CPNS1                 | GDIR         | 0,805812  | 1,165754  | 1,021372  | 0,989827 | 0,739869  | 0,871743  | -1,488503 | -1,056812 | -0,456614 | -0,602739 | -1,148962 | -0,991433 |
| ID1479          | CIO32                 |              | 0,269605  | 0,419802  | 0,852381  | 1,008474 | 1,149470  | 1,186972  | -1,908427 | -1,056789 | -0,994786 | -0,356537 | -0,772661 | 0,113362  |
| ID1446          | RANG                  | PSA3         | 0,676570  | 1,137508  | 0,693911  | 1,054936 | 0,909413  | 1,184596  | -1,348284 | -1,049857 | -0,640118 | -0,896714 | -1,047291 | -0,898848 |
| ID1022          | M6PBP                 | IF35, HNRPF  | 0,439597  | 0,737466  | 0,933654  | 1,376174 | 1,059575  | 0,930444  | -1,541882 | -1,038444 | -0,806205 | -0,409671 | -1,056138 | -0,726988 |
| ID1195          |                       |              | 0,856455  | 1,146402  | 1,367857  | 1,309097 | 0,389678  | -0,483040 | -0,459562 | -1,035851 | -1,514588 | -0,401748 | -0,938508 | -0,336631 |
| ID2031934       |                       |              | 0,363758  | 0,976740  | 0,490764  | 0,607710 | 0,892371  | 1,449185  | -1,614779 | -1,018251 | -1,049913 | -0,252713 | -0,824580 | -0,083470 |
| ID1575          |                       |              | 0,161306  | 0,609731  | 0,514382  | 1,263744 | 0,241001  | -0,548963 | -1,165979 | -1,015595 | -0,422481 | 0,853864  | 0,286680  | -0,564226 |
| ID1458          | IDI1                  | PSB10, EXOS4 | 0,570710  | 0,911426  | 0,960480  | 0,496778 | 1,170369  | 1,278319  | -1,505936 | -1,004080 | -1,010784 | -0,547814 | -0,605655 | -0,795858 |

Table S-4: cluster 7

| ID <sup>1</sup> | Protein <sup>12</sup> |                   | co_0 min  | co_30 min | co_60 min | co_24 h   | co_48 h   | co_72 h   | PI_0 min  | PI_30 min | PI_60 min | PI_24 h   | PI_48 h   | PI_72 h   |
|-----------------|-----------------------|-------------------|-----------|-----------|-----------|-----------|-----------|-----------|-----------|-----------|-----------|-----------|-----------|-----------|
| ID1396          | PSME3                 | GSTO1             | 0,250385  | 1,086590  | 0,816521  | 0,679953  | 0,989131  | 1,113645  | -2,114869 | -0,999765 | -0,874763 | -0,773979 | -0,402036 | 0,035691  |
| ID296837        |                       |                   | 0,219539  | 0,690997  | 0,965621  | 0,534652  | 0,406520  | 1,132395  | -1,187390 | -0,996942 | -1,039007 | 0,495651  | -0,875614 | -0,222508 |
| ID1488          |                       |                   | 0,079917  | 0,586662  | 0,554260  | 1,222581  | 0,683979  | 0,955063  | -1,947054 | -0,990390 | -1,196783 | -0,747430 | 0,187881  | 0,424456  |
| ID169714        | AIBP                  | CI032             | 0,786260  | 0,793888  | 1,234500  | 0,559409  | 1,060526  | 0,999436  | -1,646350 | -0,985984 | -0,929390 | -0,725855 | -0,894262 | -0,433643 |
| ID3296127       | GMFB                  |                   | 0,638681  | 1,461468  | 1,125269  | 0,138809  | -0,184209 | 0,600485  | -0,156454 | -0,985715 | -0,748460 | -2,014700 | -0,272813 | 0,893964  |
| ID3111980       | TBB2C                 |                   | 1,138625  | 1,194283  | 0,966624  | 0,771578  | 0,657216  | 0,859498  | -1,511567 | -0,980576 | -1,027745 | -0,610266 | -0,765424 | -0,844812 |
| ID3068832       |                       |                   | -0,015033 | 1,126307  | 1,025228  | 1,315749  | -0,093936 | 0,632160  | -0,990516 | -0,971586 | -1,035676 | -0,232834 | -0,504944 | -0,313128 |
| ID1697          | IF5A1                 |                   | 0,848347  | 1,270024  | 1,146201  | 1,091211  | 0,710967  | 0,410645  | -1,496390 | -0,965848 | -0,862170 | -1,062667 | -0,957686 | -0,398302 |
| ID167310        |                       |                   | 0,704177  | 1,312766  | 0,903796  | 1,158227  | 0,900611  | 0,473526  | -1,607333 | -0,935137 | -0,595754 | -0,957735 | -0,892208 | -0,704370 |
| ID110384        |                       |                   | 0,788058  | 1,126071  | 0,940075  | 1,476438  | 0,397574  | -0,370332 | -0,648201 | -0,929934 | -0,588954 | -0,341589 | -0,401484 | -1,533118 |
| ID2001699       | CPNS1                 |                   | 0,318280  | 0,530515  | 1,052886  | 0,648193  | 0,451389  | 1,538943  | -1,612552 | -0,920024 | -1,392564 | -0,445354 | -0,424698 | 0,143647  |
| ID129210        |                       |                   | 0,400237  | 0,895921  | 0,179583  | 0,964080  | 0,959327  | 0,865202  | -1,583519 | -0,907343 | -1,403508 | 1,035887  | -0,137107 | -1,009789 |
| ID1138          |                       |                   | 0,958722  | 0,954611  | 1,830480  | 0,408732  | 0,292580  | 1,54749   | -1,805869 | -0,904838 | -0,924115 | -0,687332 | -0,387662 | -0,061891 |
| ID1169          | DJB11                 | ROAA              | 0,484653  | 1,018632  | 1,136189  | 1,310380  | 0,773651  | 0,500767  | -1,142587 | -0,890153 | -1,339169 | -0,196428 | -1,046127 | -0,708023 |
| ID1497          | PRDX4                 |                   | 0,455505  | 0,819550  | 0,800975  | 0,543607  | 0,486816  | 0,614206  | -2,522994 | -0,874155 | -1,068920 | 0,225718  | 0,179381  | 0,396742  |
| ID2304779       |                       |                   | -0,043893 | 0,136748  | 0,666244  | 1,304924  | 0,947253  | 0,308304  | -1,633069 | -0,857480 | -0,055400 | -0,162103 | 0,288641  | -0,940695 |
| ID1545          |                       |                   | 0,288966  | 0,587678  | 0,313395  | 0,981333  | 0,777544  | 0,701019  | -0,727722 | -0,849211 | -0,355504 | 0,308713  | -0,281560 | -1,667473 |
| ID178566        |                       |                   | 1,226079  | 1,451093  | 1,245827  | 0,424864  | 0,282635  | -0,259418 | -1,174125 | -0,841687 | -0,818614 | -1,090213 | -0,419049 | -0,299944 |
| ID1506          |                       |                   | 0,682185  | 1,153230  | 0,944344  | 1,133782  | 0,573920  | 0,304716  | -2,063530 | -0,827627 | -0,599199 | -1,165662 | -0,554485 | 0,126911  |
| ID1296          | PPP6                  | PGP, CAZA2        | 1,129462  | 1,042558  | 1,478936  | 0,477795  | 0,514002  | 0,754204  | -1,219094 | -0,771179 | -0,638484 | -0,810453 | -1,256937 | -0,903423 |
| ID876           | TBAK                  |                   | 1,161065  | 1,108755  | 1,236093  | 0,721632  | 0,658240  | 0,724326  | -1,204533 | -0,749454 | -1,058832 | -0,677595 | -1,067477 | -1,021620 |
| ID1386          | ALBU                  |                   | 0,766090  | 1,093510  | 1,164468  | 0,997640  | 0,860493  | 0,634781  | -1,602475 | -0,745004 | -0,738696 | -0,926571 | -0,771471 | -0,964407 |
| ID1249          | PPP6                  |                   | 0,295277  | 1,646407  | 1,073879  | 0,335957  | 0,127417  | 0,581054  | -1,756682 | -0,741076 | -0,909891 | -0,244408 | -0,560357 | 0,091320  |
| ID2030105       |                       |                   | 0,342517  | 1,200913  | 0,420787  | 0,955347  | 1,063516  | 0,932534  | -1,740036 | -0,704089 | -1,090831 | -0,196137 | -1,026062 | -0,207493 |
| ID1057          |                       |                   | 0,292406  | 0,845701  | 0,668650  | 0,320530  | 0,127911  | 0,951578  | -1,306892 | -0,698539 | -1,512227 | -0,297033 | 0,921863  | -0,388205 |
| ID3711681       |                       |                   | 0,393701  | 0,886694  | 0,413526  | 2,237851  | 0,993546  | -0,658526 | -0,572857 | -0,675221 | -0,980233 | -0,432003 | -1,191682 | -0,522796 |
| ID17458         | TCPA                  | CPNE2             | 0,572664  | 1,007025  | 0,845805  | 1,155214  | 0,935325  | 0,293017  | -1,533505 | -0,673742 | -0,549506 | 0,154098  | -0,341737 | -1,826134 |
| ID1007          |                       |                   | -0,034988 | 0,835926  | 0,436845  | 1,790684  | 1,010699  | 0,263483  | -0,969405 | -0,631784 | -1,493426 | -0,055175 | -0,823361 | -0,343292 |
| ID1006          |                       |                   | 0,061495  | 1,006828  | 0,904747  | 1,204832  | 0,866008  | 0,030036  | -0,836051 | -0,624470 | -1,236616 | -0,486593 | -0,343407 | -0,668458 |
| ID17391         | PAK2                  |                   | 0,043609  | 0,179084  | 0,746877  | 1,129213  | 1,100052  | -0,526543 | -1,009900 | -0,566497 | -0,393200 | -0,322503 | -0,061059 | -0,399759 |
| ID1526          | UBE2K                 | RPE, CBX5, GSTP1  | 0,552664  | 0,726505  | 0,770851  | 0,987724  | 0,613896  | 0,801215  | -2,281455 | -0,536179 | -0,430820 | 0,598250  | -0,674042 | -0,979047 |
| ID371745        | COR1B                 | PLST              | 0,855291  | 0,580312  | 1,077552  | 0,041166  | -0,527375 | 1,204666  | -1,934622 | -0,521748 | -0,922554 | -0,906866 | 0,970702  | -0,143242 |
| ID158651        |                       |                   | 0,879209  | 1,134480  | 0,924621  | 0,665062  | 0,892267  | 0,261396  | -0,632759 | -0,519082 | -1,539497 | -0,718405 | -0,547741 | -0,979153 |
| ID844           | PPP5                  | RHG01             | 0,456013  | 0,758649  | 0,947290  | 0,736003  | 0,300297  | 0,319382  | -1,263791 | -0,497248 | -0,738020 | 0,154515  | -0,689591 | -0,444870 |
| ID3395583       |                       |                   | 0,207031  | 0,019664  | 0,459020  | 0,788903  | 1,357422  | 0,376805  | -1,412978 | -0,478693 | -1,068225 | 1,020748  | -0,850459 | -0,164049 |
| ID829           |                       |                   | -0,184064 | 0,655026  | 0,799922  | 0,074728  | -0,173310 | 1,211333  | -1,636140 | -0,467173 | -0,677059 | -0,444902 | 1,032436  | -0,302021 |
| ID1130          |                       |                   | 0,549760  | 0,440830  | 1,603315  | 0,508175  | 0,716474  | -0,255407 | -0,283644 | -0,458882 | -1,412723 | -1,103883 | -0,474192 | -0,105796 |
| ID421481        |                       |                   | 1,222874  | 0,752967  | 1,876617  | -0,824346 | 0,390736  | 0,861341  | -0,971275 | -0,416255 | -0,729908 | -0,575946 | -0,859384 | -0,871408 |
| ID2019749       |                       |                   | 0,584401  | 0,722622  | 0,724147  | 0,699542  | 0,664836  | 0,264683  | -2,024043 | -0,376996 | -1,691140 | 0,478290  | 0,389621  | -0,316390 |
| ID1052          | SET                   | ADRM1, MYL3       | 0,987818  | 1,538866  | 1,098522  | 0,326743  | 0,466006  | 0,269192  | -1,048864 | -0,286931 | -1,073257 | -1,224536 | -0,721351 | -0,638343 |
| ID221306        |                       |                   | -0,043605 | 1,068324  | 0,836477  | 0,718102  | 0,613717  | 0,436684  | -0,940820 | -0,205232 | -1,361160 | 0,984965  | -0,881719 | -0,979491 |
| ID2003479       | AN32A                 |                   | 0,564800  | 0,710597  | 0,715973  | 0,540314  | 1,151373  | -0,313346 | -2,164612 | -0,201734 | -0,624876 | 0,739745  | -0,495219 | -0,438080 |
| ID3763726       |                       |                   | 0,370185  | 0,564617  | 0,594277  | 0,978055  | 1,005211  | 0,576056  | -1,952831 | -0,015523 | -0,082042 | -0,613527 | -0,025475 | -1,552385 |
| ID92002         | SET                   | SPSY, HSP7C, RSSA | 0,724245  | 1,491220  | 0,993944  | 0,267507  | 0,862193  | -0,044036 | -2,007865 | -0,012659 | -1,177182 | -0,546326 | -0,086270 | -0,601352 |

Table S-4: cluster 8

| Cluster 8       |                       |                  | Z-score <sup>13</sup> |           |           |           |          |          |           |           |           |           |           |           |
|-----------------|-----------------------|------------------|-----------------------|-----------|-----------|-----------|----------|----------|-----------|-----------|-----------|-----------|-----------|-----------|
| ID <sup>1</sup> | Protein <sup>12</sup> |                  | co_0 min              | co_30 min | co_60 min | co_24 h   | co_48 h  | co_72 h  | PI_0 min  | PI_30 min | PI_60 min | PI_24 h   | PI_48 h   | PI_72 h   |
| ID610           | EFG1                  |                  | -0,029935             | 0,108801  | 0,033984  | 1,500188  | 1,175257 | 1,185965 | -0,510628 | -0,968351 | -0,850104 | -2,858073 | -0,196024 | -0,020116 |
| ID352           |                       |                  | 0,695941              | 0,583865  | 0,428216  | 0,888344  | 0,885530 | 0,921341 | -0,086414 | -0,937436 | -0,645562 | -2,769655 | -0,445094 | -0,211489 |
| ID2083630       |                       |                  | 0,357327              | 0,533213  | 0,435209  | 0,884278  | 0,963232 | 1,268485 | -0,169661 | -0,656479 | -0,489788 | -2,722218 | -0,395032 | -0,689119 |
| ID2072345       |                       |                  | 0,222592              | 0,326335  | 0,224143  | 0,836998  | 0,756584 | 1,530892 | 0,007117  | -0,797118 | -0,652741 | -2,663314 | -0,159203 | -0,298113 |
| ID2081733       |                       |                  | 0,331826              | 0,447741  | 0,389042  | 0,859900  | 0,889998 | 1,471298 | -0,027940 | -0,754724 | -0,423645 | -2,656278 | -0,440855 | -0,750431 |
| ID349           |                       |                  | 0,216482              | 0,439768  | 0,297166  | 0,972028  | 0,858517 | 1,328814 | 0,061414  | -0,720097 | -0,617172 | -2,611886 | -0,389424 | -0,488584 |
| ID584           | GELS                  | MX1, HS90A       | 0,108919              | 0,535924  | 0,341208  | 0,939251  | 1,159421 | 1,457379 | -0,599026 | -0,577056 | -0,623625 | -2,602270 | -0,285012 | -0,505680 |
| ID351           |                       |                  | 0,533847              | 0,550971  | 0,347574  | 0,971801  | 0,989479 | 1,201803 | -0,121880 | -0,792819 | -0,648743 | -2,596320 | -0,775632 | -0,309160 |
| ID508072        | SODC                  |                  | 0,379676              | 0,553569  | 0,331171  | 0,755282  | 0,612954 | 0,726363 | -0,611445 | -0,337398 | -0,235587 | -2,545740 | -0,371668 | -0,530047 |
| ID354           | SF3B2                 |                  | 0,329550              | 0,536025  | 0,505805  | 1,096202  | 0,914769 | 1,171158 | -0,476664 | -0,998196 | -0,928133 | -2,519254 | -0,110849 | -0,150229 |
| ID460138        | GANAB                 |                  | 0,308182              | 0,570639  | 0,388766  | 0,999550  | 1,046960 | 1,367759 | 0,009579  | -0,646268 | -0,864041 | -2,502857 | -0,794557 | -0,509425 |
| ID1175          |                       |                  | 0,488482              | 1,163011  | 0,846315  | 0,995879  | 0,585339 | 0,826619 | -0,735695 | -0,360985 | -0,766024 | -2,387844 | -0,736305 | -0,515753 |
| ID242682        |                       |                  | 0,284643              | 0,643446  | 0,391419  | 1,164674  | 0,990941 | 1,198426 | -0,211155 | -0,934079 | -0,755455 | -2,379330 | -0,514707 | -0,473654 |
| ID240305        |                       |                  | 0,392240              | 0,683715  | 0,413592  | 1,235212  | 1,033443 | 1,078813 | -0,291330 | -0,915831 | -0,783582 | -2,366730 | -0,589151 | -0,482073 |
| ID2042668       |                       |                  | 0,174380              | 0,350313  | -0,035329 | 0,525941  | 0,668058 | 1,861282 | -0,240103 | -0,706590 | -0,200525 | -2,344656 | -0,193483 | -0,445454 |
| ID1511          | PARK7                 |                  | 0,431869              | 0,701888  | 0,548798  | 0,756158  | 0,697122 | 0,739903 | -0,946713 | -0,963054 | -0,669325 | -2,248547 | -0,096546 | -0,075828 |
| ID3261240       |                       |                  | -0,229031             | 0,289135  | 0,113731  | 0,892182  | 1,242248 | 1,567371 | -0,535471 | -0,361954 | -0,260172 | -2,242306 | -0,430307 | -0,606002 |
| ID339           |                       |                  | 0,286982              | 0,675852  | 0,352117  | 1,003927  | 1,394390 | 0,713947 | 0,002502  | -0,414798 | -0,888495 | -2,225046 | -0,554522 | -0,903118 |
| ID355           | SF3B2                 |                  | 0,435750              | 0,718846  | 0,641971  | 1,226683  | 1,017301 | 1,065827 | -0,558159 | -1,076574 | -0,943917 | -2,219966 | -0,363354 | -0,499399 |
| ID888           | TCPB                  | RUVB1            | 0,620835              | 1,043889  | 0,752012  | 1,035976  | 0,738231 | 0,574368 | -0,775628 | -0,896950 | -0,755523 | -2,211508 | -0,455009 | -0,223570 |
| ID2221628       |                       |                  | 0,416742              | 0,630554  | 0,530841  | 0,915504  | 0,949784 | 0,991984 | -0,647234 | -0,632908 | -0,523709 | -2,178740 | -0,209246 | -0,788256 |
| ID240147        |                       |                  | 0,435209              | 0,684898  | 0,395819  | 1,217251  | 0,939918 | 1,254172 | -0,239064 | -0,898013 | -0,788215 | -2,160083 | -0,813324 | -0,568589 |
| ID2085530       |                       |                  | 0,254323              | 0,420134  | 0,374360  | 0,955482  | 0,836620 | 1,485026 | -0,061949 | -1,305942 | -0,534978 | -2,137177 | -0,133125 | -0,687067 |
| ID760           | TCPG                  |                  | 0,395289              | 0,964069  | 0,553602  | 1,271556  | 0,844478 | 0,810017 | -0,791215 | -0,826593 | -0,880887 | -2,061465 | -0,485218 | -0,308998 |
| ID585           | MD1L1                 | GELS             | 0,273043              | 0,753390  | 0,584148  | 1,312731  | 1,276017 | 1,045104 | -0,804600 | -0,833422 | -0,841353 | -2,060776 | -0,616022 | -0,603452 |
| ID371           |                       |                  | 0,298760              | 0,180884  | 0,250149  | 1,145010  | 1,008382 | 1,461813 | -0,225172 | -0,877478 | -0,723159 | -2,059485 | -0,127525 | -0,847050 |
| ID2040831       |                       |                  | 0,145524              | 0,475463  | -0,106150 | 0,826671  | 0,729054 | 1,483488 | -0,277715 | -1,318032 | -0,267729 | -2,026861 | 0,308017  | -0,478445 |
| ID908           | SYHC                  |                  | 0,469766              | 0,988585  | 0,748156  | 1,178118  | 0,981297 | 0,915938 | -0,806784 | -0,330611 | -0,557581 | -2,023354 | -1,300981 | -0,768387 |
| ID1481          |                       |                  | 0,191338              | 0,493000  | 0,266254  | 0,929366  | 0,676390 | 0,957908 | -0,851676 | -1,837148 | -0,321525 | -1,988349 | 0,601169  | 0,386185  |
| ID114983        |                       |                  | 0,256204              | 1,143798  | 0,119380  | 0,827347  | 0,231606 | 1,298814 | -1,447354 | -0,328885 | -0,312034 | -1,970174 | -0,175144 | -0,136102 |
| ID350           |                       |                  | 0,294856              | 0,666799  | 0,287776  | 1,068373  | 1,128801 | 1,528021 | -0,261832 | -1,180142 | -0,933897 | -1,965739 | -0,751489 | -0,372960 |
| ID479           | TIF1B                 | HNRPU            | 0,414180              | 0,447553  | 0,399349  | 1,364024  | 1,325004 | 0,886416 | -0,829297 | -1,184036 | -1,006669 | -1,954605 | -0,265604 | -0,084967 |
| ID457           | HNRL2                 |                  | 0,383301              | 0,376652  | 0,377085  | 0,916834  | 1,320028 | 1,414149 | 0,196207  | -1,218100 | -1,136287 | -1,948261 | -0,612462 | -0,556210 |
| ID840           | TBA1B                 | TBAK, TBA3, VIME | 1,316597              | 0,897181  | 0,616765  | -0,007913 | 1,331824 | 0,440339 | 0,167204  | -0,742545 | -1,084315 | -1,928440 | -0,838017 | -0,650789 |
| ID5909          |                       |                  | 0,154414              | 0,127491  | 0,355921  | 0,876085  | 1,191744 | 1,697564 | 0,241909  | -1,346774 | -1,031018 | -1,909380 | -0,472807 | -0,362495 |
| ID51803         |                       |                  | 0,197229              | 0,515290  | 0,119463  | 0,894666  | 1,239447 | 1,137208 | -0,796598 | -1,603931 | -0,897093 | -1,903683 | 0,114507  | 0,507574  |
| ID440           |                       |                  | 0,440641              | 0,417281  | 0,352281  | 0,989250  | 1,075801 | 1,224040 | -0,732321 | -0,755794 | -1,359460 | -1,897169 | -0,214769 | -0,014072 |
| ID388           |                       |                  | 0,422338              | 0,553488  | 0,409664  | 0,939087  | 1,063488 | 1,384194 | -0,046101 | -0,713090 | -1,097926 | -1,894598 | -0,756478 | -0,737715 |
| ID1586          | RBM8A                 |                  | -0,275552             | 0,812449  | 0,120262  | 1,341455  | 1,191143 | 1,439821 | -0,202014 | -0,431188 | -0,900353 | -1,852725 | -0,658425 | -1,048054 |
| ID411894        |                       |                  | 0,036657              | 1,041249  | 0,376920  | 1,128533  | 0,120689 | 1,285999 | 0,413036  | -1,141945 | -1,216445 | -1,852661 | -0,704511 | 0,049313  |
| ID584346        | PRDX3                 | HSPB1            | 0,493077              | 0,666300  | 0,618728  | 0,567673  | 0,638932 | 0,762455 | -1,405874 | -0,956409 | -0,655934 | -1,847641 | 0,052012  | 0,142860  |
| ID2308652       |                       |                  | 0,419935              | 0,289815  | 0,557853  | 1,044613  | 1,564227 | 1,151648 | -0,208563 | -0,780529 | -0,832983 | -1,815629 | -0,808500 | -1,035795 |
| ID313877        |                       |                  | 0,255977              | 0,250312  | 0,110183  | 0,815213  | 1,154185 | 1,426074 | -0,863624 | -1,174217 | -0,970237 | -1,787665 | 0,035398  | 0,301485  |
| ID356           |                       |                  | 0,508058              | 0,797209  | 0,412454  | 1,097823  | 1,210246 | 1,349619 | -0,580855 | -0,980466 | -0,944968 | -1,752299 | -0,965284 | -0,589612 |
| ID13335         | DPOD2                 |                  | -0,409059             | -0,441970 | -0,499844 | 0,989758  | 1,554702 | 1,841358 | -0,377871 | -0,660732 | 0,094214  | -1,744786 | -0,422086 | -0,359880 |
| ID458           | HNRL2                 |                  | 0,504191              | 0,537110  | 0,415044  | 1,090850  | 1,239605 | 1,248872 | -0,015022 | -1,443895 | -1,194259 | -1,731691 | -0,532757 | -0,550970 |
| ID37898         |                       |                  | 0,640412              | 0,712498  | 0,628228  | 0,990896  | 0,932718 | 0,875145 | -0,945467 | -0,874016 | -1,356161 | -1,715797 | -0,188262 | -0,129144 |
| ID3130260       |                       |                  | 0,289140              | 0,738698  | 0,247568  | 1,454197  | 1,350532 | 1,028194 | -0,444653 | -0,890073 | -0,837516 | -1,709275 | -1,072118 | -0,582013 |
| ID80360         |                       |                  | -0,232350             | 0,390501  | 0,880543  | 0,655071  | 1,045052 | 1,189198 | -0,876233 | -0,555924 | -0,337314 | -1,672967 | -0,675254 | -0,228563 |
| ID2105992       |                       |                  | 0,582738              | 0,670454  | 0,489859  | 1,004528  | 0,925067 | 1,303714 | -0,175865 | -0,823938 | -0,786158 | -1,667733 | -1,095945 | -0,843656 |
| ID2906459       | SET                   |                  | 0,587792              | 1,053920  | 1,181457  | 0,976898  | 0,509058 | 0,538802 | -0,894622 | -0,431469 | -1,082585 | -1,645020 | -0,529687 | -0,675800 |
| ID309           |                       |                  | 0,290112              | 0,613938  | 0,321694  | 1,242160  | 1,335038 | 1,282958 | -0,447689 | -1,415603 | -0,894696 | -1,631640 | -0,671896 | -0,432288 |
| ID8247          | ACTN4                 |                  | 0,376440              | 0,522867  | 0,392524  | 1,246934  | 1,493530 | 1,094795 | -0,416783 | -1,319141 | -1,188494 | -1,620622 | -0,479408 | -0,507797 |
| ID393893        |                       |                  | 0,587868              | 0,785838  | 0,606803  | 0,880213  | 0,896125 | 1,346027 | -0,150287 | -0,670922 | -1,006116 | -1,617137 | -1,311120 | -0,751577 |
| ID488           | TIF1B                 |                  | 0,602428              | 0,879891  | 0,668974  | 0,924235  | 1,183969 | 0,927525 | -0,162550 | -1,457597 | -1,450393 | -1,616903 | -0,348519 | -0,555285 |
| ID1183          | BIEA                  | TALDO            | 0,081477              | 0,823701  | 0,516483  | 1,298451  | 1,033412 | 0,858253 | -0,912366 | -0,209182 | -0,721516 | -1,614788 | -0,987590 | -0,570033 |
| ID276677        | PSMD4                 |                  | -0,191686             | 0,706897  | -0,060192 | 1,331270  | 1,594808 | 0,700737 | -0,336932 | -0,884683 | -0,975762 | -1,601103 | -0,574016 | -0,109615 |

Table S-4: cluster 8

| ID <sup>1</sup> | Protein <sup>2</sup> |                   | co_0 min  | co_30 min | co_60 min | co_24 h  | co_48 h   | co_72 h   | PI_0 min  | PI_30 min | PI_60 min | PI_24 h   | PI_48 h   | PI_72 h   |
|-----------------|----------------------|-------------------|-----------|-----------|-----------|----------|-----------|-----------|-----------|-----------|-----------|-----------|-----------|-----------|
| ID1491          | UCHL1                |                   | 0,288051  | 1,286182  | 0,368445  | 1,460352 | 0,675942  | 0,696822  | -1,376696 | -0,639049 | -0,392231 | -1,599602 | -1,050727 | -0,117389 |
| ID1081          |                      |                   | 0,935664  | 0,879072  | 1,300729  | 0,613041 | 0,214876  | 1,131938  | -0,640048 | -0,361973 | -1,035650 | -1,593327 | -1,047093 | -0,795560 |
| ID1913428       | ELOB                 |                   | -0,300182 | -0,206354 | -0,129656 | 0,851847 | 1,185993  | 1,581945  | -0,568358 | -0,677066 | -0,558422 | -1,570868 | -0,023136 | 0,021541  |
| ID2044505       |                      |                   | 0,276816  | 0,268245  | 0,049302  | 0,639937 | 0,879928  | 1,792113  | -0,527505 | -0,971103 | -0,555227 | -1,566187 | -0,233959 | -0,443906 |
| ID478           | UBA1                 | TIF1B             | 0,571239  | 0,714024  | 0,620434  | 0,948849 | 1,248902  | 1,253194  | -0,799543 | -1,373498 | -1,228123 | -1,561052 | -0,447043 | -0,337647 |
| ID835           | TBA1B                | TBAK, TBA3, IFIT3 | 0,819179  | 0,613713  | 0,335175  | 0,664581 | 2,095913  | -0,039621 | -0,615671 | -0,872913 | -0,392092 | -1,550750 | -0,436795 | -1,008406 |
| ID885           | SYWC                 |                   | 0,552775  | 0,688660  | 0,719280  | 0,758106 | 0,976833  | 1,382507  | -1,489518 | -1,252294 | -0,876138 | -1,546849 | -0,437578 | 0,137503  |
| ID64437         | EF1B                 |                   | 0,475473  | 1,158563  | 0,338168  | 1,219152 | 1,040437  | 0,812263  | -0,726204 | -1,169135 | -0,065771 | -1,544966 | -0,842147 | -1,082074 |
| ID353686        |                      |                   | 0,631174  | 0,885265  | 0,530495  | 0,742093 | 0,549341  | 1,249476  | -1,180944 | -1,270570 | -0,519331 | -1,543151 | -0,068644 | -0,390993 |
| ID323167        |                      |                   | 0,146509  | 0,109664  | 0,444481  | 1,040522 | 1,428547  | 1,186225  | 0,420914  | -0,378166 | -0,994604 | -1,537714 | -1,046912 | -1,203894 |
| ID1522          | PFD3                 |                   | 0,424588  | 0,908959  | 0,635754  | 1,222168 | 0,856119  | 0,513479  | -1,126391 | -0,911576 | -0,945464 | -1,533962 | -0,323813 | -0,486842 |
| ID447           | HNRPU                |                   | 0,063157  | 0,356897  | 0,089480  | 1,164532 | 1,182086  | 1,813450  | -0,525430 | -1,090385 | -1,258853 | -1,532027 | -0,301060 | -0,344853 |
| ID483           |                      |                   | 0,401484  | 0,646617  | 0,176219  | 1,400498 | 1,138787  | 1,303299  | -0,287929 | -1,402990 | -1,152469 | -1,530360 | -0,712885 | -0,362861 |
| ID431           | VINC                 |                   | 0,503460  | 0,727191  | 0,614557  | 1,131117 | 1,205434  | 1,175034  | -0,243618 | -1,155213 | -1,181642 | -1,521715 | -0,787395 | -0,847639 |
| ID540509        | MVP                  |                   | 0,364098  | 0,389815  | 0,434082  | 1,292535 | 1,466056  | 1,233461  | -0,739583 | -1,022730 | -1,129424 | -1,519723 | -0,424679 | -0,723840 |
| ID197182        | MVP                  | UBA1              | 0,552895  | 0,620964  | 0,566874  | 0,851529 | 1,213350  | 1,402974  | -0,890930 | -1,318863 | -1,280774 | -1,511908 | -0,385892 | -0,198197 |
| ID410           | DPOD2                |                   | 0,544664  | 0,732278  | 0,462199  | 1,170225 | 1,089667  | 1,213036  | -0,345561 | -1,053371 | -1,465030 | -1,510660 | -0,873665 | -0,341449 |
| ID88373         | HDGF                 |                   | 0,675227  | 1,112460  | 0,861538  | 1,016175 | 0,743634  | 1,161693  | -1,246495 | -1,051009 | -0,819084 | -1,492958 | -0,559607 | -0,774813 |
| ID1793947       |                      |                   | 0,185083  | 0,523060  | 0,605553  | 1,088761 | 0,756067  | 0,816863  | -1,045341 | 0,074262  | -0,180886 | -1,488396 | -0,665213 | -0,852895 |
| ID2068313       |                      |                   | 0,274080  | 0,253300  | 0,087363  | 1,137847 | 1,271966  | 1,664710  | -0,294232 | -1,440716 | -1,062739 | -1,485044 | -0,400115 | -0,377682 |
| ID72360         | MLRN                 |                   | 0,195809  | 0,664703  | 1,054933  | 1,050367 | 0,784857  | 0,277889  | -1,768330 | 0,075883  | -0,015021 | -1,471627 | -0,746765 | -0,470603 |
| ID918           | HNRH1                | CNDP2, SNX6       | 0,230313  | 0,777827  | 0,589018  | 1,283018 | 1,058720  | 1,139220  | 0,120318  | -0,891558 | -1,435563 | -1,466730 | -0,970854 | -0,800411 |
| ID114043        |                      |                   | 0,618004  | 1,153142  | 0,298896  | 0,812926 | 0,714737  | 1,279830  | -1,413354 | -1,103385 | -0,999415 | -1,458725 | -0,234294 | -0,033042 |
| ID5526          | HYOU1                |                   | 0,546856  | 0,724212  | 0,336864  | 1,093148 | 1,330978  | 0,929990  | -0,936908 | -1,648937 | -1,089141 | -1,457952 | -0,143690 | -0,049907 |
| ID3763666       |                      |                   | 1,158441  | 1,091339  | 1,146050  | 0,507029 | 0,650319  | 0,910862  | -0,575609 | -0,830799 | -0,877595 | -1,456123 | -1,259299 | -0,828647 |
| ID381           | DYNA                 |                   | 0,565490  | 0,587786  | 0,509121  | 0,993719 | 1,351996  | 1,285561  | -0,780332 | -1,435264 | -1,105477 | -1,456035 | -0,274465 | -0,606107 |
| ID2062951       |                      |                   | 0,314053  | 0,464334  | 0,250882  | 1,292845 | 1,104505  | 1,526949  | -0,456990 | -0,955107 | -0,704969 | -1,445512 | -0,903685 | -0,848682 |
| ID951           | BLMHLA               | PA2G4             | 0,713995  | 1,135547  | 0,987182  | 1,004419 | 0,716095  | 1,042235  | -1,260235 | -0,821740 | -1,141569 | -1,442187 | -0,758515 | -0,535776 |
| ID29521         | HNRH1                | HNRH2             | 0,286086  | 0,835160  | 0,603626  | 1,312710 | 1,055541  | 1,214303  | -0,265220 | -0,999069 | -1,304518 | -1,436623 | -0,924961 | -0,736190 |
| ID651           | ACPH                 |                   | 0,679909  | 1,240860  | 0,920252  | 0,696760 | 0,828660  | 0,983787  | -1,392961 | -0,035382 | -0,590821 | -1,434110 | -1,043981 | -1,211502 |
| ID373664        |                      |                   | 0,255053  | 0,647220  | 0,638463  | 1,052629 | 1,062960  | 1,194629  | -0,739215 | -0,361320 | -0,377948 | -1,432134 | -1,461982 | -0,836388 |
| ID3760270       | KU86                 |                   | 0,758584  | 0,773231  | 0,806901  | 1,416983 | 0,685429  | 0,776207  | -1,198616 | -1,059165 | -1,059165 | -1,417784 | -0,534208 | -0,891052 |
| ID441           | HNRL2                |                   | 0,488887  | 0,523480  | 0,354551  | 1,215342 | 1,333460  | 1,184615  | -0,131271 | -1,540165 | -1,210869 | -1,413913 | -0,500739 | -0,656856 |
| ID2039001       |                      |                   | -0,164438 | 0,391123  | -0,341831 | 1,140706 | 0,473691  | 1,555089  | -0,221143 | -1,727951 | -0,325162 | -1,398728 | 0,675753  | -0,406790 |
| ID529           |                      |                   | 0,087795  | 0,291710  | -0,010711 | 1,231183 | 1,386554  | 1,433793  | -0,965937 | -1,372670 | -0,983641 | -1,397446 | -0,156477 | 0,106485  |
| ID142473        |                      |                   | 0,362939  | 0,620521  | -0,141267 | 1,243516 | 1,208635  | 1,137628  | -0,884366 | -0,207401 | -0,953534 | -1,396582 | -0,097347 | -1,241887 |
| ID1689          | STMN1                |                   | 0,474214  | 0,848951  | 0,366437  | 0,974885 | 1,071143  | 1,631224  | -0,800136 | -1,245109 | -0,335290 | -1,393226 | -0,920701 | -1,020699 |
| ID1194          | HDGF                 |                   | 0,631456  | 1,027803  | 0,729204  | 0,851293 | 0,935540  | 1,349727  | -1,339072 | -1,074012 | -0,922464 | -1,381607 | -0,562538 | -0,590731 |
| ID1375          | RFA2                 |                   | 0,343607  | 0,693564  | 0,684059  | 1,362673 | 1,188453  | 1,225097  | -0,872265 | -1,135768 | -0,631149 | -1,381303 | -0,985507 | -0,836785 |
| ID3542          | UBA5                 |                   | -0,049013 | 0,334679  | 0,293686  | 1,606500 | 1,410718  | 1,072247  | -0,692880 | -1,091480 | -0,966230 | -1,363379 | -0,408793 | -0,486899 |
| ID557           | SRC8                 |                   | 0,689325  | 0,999286  | 0,676022  | 0,948831 | 1,031918  | 1,142104  | -0,839462 | -1,602976 | -0,934513 | -1,355008 | -0,717364 | -0,376916 |
| ID1084          | TADBP                | PPME1             | 0,589525  | 0,784577  | 0,795964  | 0,813976 | 1,101804  | 1,201421  | -0,909589 | -1,736106 | -0,733760 | -1,353721 | -0,840074 | -0,052448 |
| ID11367         |                      |                   | -0,094993 | 0,410677  | 0,043439  | 0,736357 | 1,489962  | 1,771229  | -0,250856 | -0,437499 | -0,078125 | -1,347757 | -1,217063 | -1,362310 |
| ID2737054       |                      |                   | 0,612389  | 0,577324  | 0,688221  | 0,925344 | -0,141805 | 1,012994  | -0,282288 | -1,314808 | -0,587925 | -1,339386 | -0,297885 | -0,731595 |
| ID650           | DC1I2                |                   | 0,544076  | 0,831076  | 0,492427  | 1,394361 | 1,099498  | 1,123055  | -0,577831 | -0,766712 | -0,757655 | -1,338757 | -1,282147 | -1,096081 |
| ID953           | ENOG                 | RBBP7             | -0,060483 | 0,739740  | 0,020794  | 1,759279 | 1,335875  | 1,064026  | -0,463778 | -0,562344 | -0,585341 | -1,334264 | -0,897072 | -1,349999 |
| ID540           | TERA                 |                   | 0,417371  | 0,577187  | 0,259697  | 1,536489 | 1,476236  | 0,642974  | -0,836834 | -1,324666 | -1,158224 | -1,328995 | -0,506364 | -0,357120 |
| ID3761675       |                      |                   | 0,468643  | 0,598627  | 0,156642  | 1,387992 | 1,228046  | 0,681599  | -0,992533 | 0,260293  | -0,829719 | -1,325745 | -0,937459 | -1,027822 |
| ID23217         |                      |                   | 0,421064  | 0,625418  | 0,360208  | 1,412143 | 1,084107  | 1,337291  | -0,844743 | -1,426980 | -1,089831 | -1,325161 | -0,568925 | -0,315881 |
| ID3348523       | DCUP                 |                   | 0,398081  | 0,857437  | 0,691929  | 1,296166 | 0,444177  | 1,395197  | -1,182114 | -1,517188 | -1,011467 | -1,324397 | -0,230861 | -0,148057 |
| ID629           | KU86                 | HS90A             | 0,577087  | 0,719237  | 0,682173  | 1,077500 | 1,383680  | 0,967312  | -0,776839 | -0,857600 | -1,060041 | -1,324086 | -0,646156 | -1,073288 |
| ID939           | AL9A1                |                   | 0,455772  | 0,688648  | 0,514566  | 1,110833 | 1,139882  | 1,412242  | -1,374320 | -1,278906 | -0,779634 | -1,318791 | -0,531473 | -0,368516 |
| ID442           | DDB1                 |                   | -0,290462 | -0,424843 | 0,306616  | 1,431961 | 1,494664  | 1,379656  | -0,019469 | -0,148382 | -0,618372 | -1,318504 | -0,964905 | -1,157585 |
| ID5403          | HYOU1                |                   | 0,393545  | 0,543840  | 0,243871  | 1,020212 | 1,355245  | 1,067597  | -0,912007 | -1,701422 | -1,198156 | -1,318204 | -0,031781 | 0,207709  |
| ID432           | VINC                 |                   | 0,149751  | 0,473204  | 0,271436  | 1,272419 | 1,353504  | 1,320952  | -1,048708 | -1,360240 | -1,148423 | -1,310060 | -0,193084 | -0,108266 |
| ID460           | MVP                  | SYAC, UBA1        | 0,610075  | 0,717432  | 0,646403  | 1,012267 | 1,186612  | 1,171628  | -1,205922 | -1,392975 | -1,309808 | -0,411673 | -0,147470 | -0,147470 |
| ID1229          |                      |                   | -0,152184 | 0,275968  | -0,521535 | 1,974391 | 1,262162  | 0,190461  | -0,058509 | -0,685093 | -0,366538 | -1,297011 | -0,601469 | -0,344898 |
| ID9875          | TERA                 |                   | 0,573738  | 0,911297  | 0,529487  | 1,248258 | 1,159142  | 1,013244  | -0,838805 | -1,397550 | -1,243686 | -1,288921 | -0,641984 | -0,346447 |
| ID1319          | DNJC9                |                   | 0,376901  | 1,269045  | 0,889724  | 1,276219 | 0,706575  | 0,813525  | -1,354255 | -0,512847 | -1,148989 | -1,287147 | -0,657085 | -0,693453 |

Table S-4: cluster 8

| ID <sup>1</sup> | Protein <sup>12</sup> |                     | co_0 min  | co_30 min | co_60 min | co_24 h  | co_48 h  | co_72 h   | PI_0 min  | PI_30 min | PI_60 min | PI_24 h   | PI_48 h   | PI_72 h   |
|-----------------|-----------------------|---------------------|-----------|-----------|-----------|----------|----------|-----------|-----------|-----------|-----------|-----------|-----------|-----------|
| ID2028269       |                       |                     | 0,127405  | 0,983162  | 0,116627  | 1,350944 | 0,647804 | 1,400465  | -1,655956 | -0,227938 | -0,753518 | -1,284966 | -0,789634 | -0,235637 |
| ID1128          | EI2BL                 | CAPG, ROAA          | 0,444777  | 0,893644  | 0,515782  | 1,040382 | 1,096439 | 1,262710  | -1,360539 | -1,444477 | -0,859920 | -1,281318 | -0,563443 | -0,064367 |
| ID965           | ARP3                  |                     | 0,603560  | 0,707871  | 0,683130  | 1,352064 | 1,188726 | 1,009372  | -0,990442 | -1,403139 | -0,835852 | -1,271016 | -0,826420 | -0,535607 |
| ID475           | ICAL                  |                     | 0,270969  | 0,498940  | 0,141484  | 1,336966 | 1,068207 | 1,405636  | -1,030653 | -1,595871 | -0,975885 | -1,267205 | -0,233813 | 0,064424  |
| ID519           |                       |                     | 0,600738  | 0,880660  | 0,400898  | 1,271280 | 0,860172 | 1,341592  | -0,500729 | -0,999459 | -1,376646 | -1,256310 | -0,800411 | -0,735862 |
| ID970           | ODO2                  |                     | 0,141332  | 0,484250  | 0,407888  | 1,571358 | 0,920028 | 1,499216  | -1,189549 | -1,039152 | -0,690358 | -1,237898 | -0,843343 | -0,333246 |
| ID554833        | UBE1                  |                     | 0,615613  | 0,678701  | 0,659260  | 1,262033 | 1,200254 | 0,890814  | -0,803061 | -1,469282 | -1,309709 | -1,235427 | -0,436493 | -0,361559 |
| ID4923          |                       |                     | 0,005540  | 0,381833  | -0,381534 | 1,137217 | 1,419923 | 1,137217  | 0,134407  | -1,438640 | -1,087720 | -1,228175 | -0,106538 | -0,492729 |
| ID391           | HNRPU                 |                     | 0,381947  | 0,518161  | 0,609963  | 1,173902 | 1,409664 | 1,154084  | -0,293887 | -1,229181 | -0,517539 | -1,227025 | -1,398453 | -0,888390 |
| ID1244          | PSDE                  |                     | 0,425747  | 0,816034  | 0,699110  | 0,745484 | 0,594178 | 0,581349  | -0,368177 | -0,831136 | -0,574151 | -1,220208 | -0,610595 | -0,562685 |
| ID2310          | TEBP                  |                     | 0,643075  | 0,445204  | 1,107684  | 0,854595 | 0,567594 | 1,294346  | -0,994736 | -0,992231 | -0,961878 | -1,206788 | -0,447902 | -0,610661 |
| ID593           |                       |                     | -0,595937 | -0,148283 | -0,385206 | 1,255113 | 1,003646 | 1,578471  | -0,491682 | -0,729051 | -0,178405 | -1,200926 | -0,016243 | -0,391727 |
| ID7894          | MVP                   | TIF1B, MVP          | 0,026143  | 0,264708  | 0,243266  | 1,075193 | 1,254143 | 1,714447  | -1,093122 | -1,455296 | -1,067370 | -1,199614 | -0,177334 | 0,114933  |
| ID1078          | EIF3G                 | ARP3, TADBP, ACTB   | 0,246424  | 0,646652  | 0,557777  | 1,817074 | 1,042559 | 0,835897  | -0,697614 | -0,972224 | -0,559987 | -1,198223 | -1,356425 | -0,661467 |
| ID972           | SHLB2                 |                     | 0,307089  | 0,619724  | 0,356951  | 1,118164 | 1,352581 | 1,455777  | -1,097090 | -1,441127 | -0,795259 | -1,196895 | -0,491560 | -0,487579 |
| ID901           | CNDP2                 | PEPD                | 0,730139  | 0,884580  | 0,878465  | 0,973854 | 1,089784 | 1,132794  | -0,927624 | -1,038541 | -0,651770 | -1,195415 | -1,189683 | -0,985437 |
| ID311244        |                       |                     | 0,612535  | 0,419838  | 0,688508  | 1,062270 | 0,245464 | 1,503594  | -0,775305 | -1,715278 | -1,140038 | -1,192015 | -0,001991 | -0,005585 |
| ID1374          | TPM3                  | TPM4, TPM2, TPM3L   | 0,310184  | 0,811978  | 0,222804  | 1,233690 | 1,251631 | 1,477923  | -0,651795 | -1,293475 | -0,985454 | -1,188399 | -0,958409 | -0,527778 |
| ID937           | SCRN1                 |                     | 0,387143  | 0,707369  | 0,355752  | 1,112070 | 1,234363 | 1,256496  | -1,432108 | -1,467936 | -0,990704 | -1,184686 | -0,301832 | 0,027902  |
| ID1252          | PP2AA                 | ACTG, ANXA2         | -0,130412 | 0,715574  | 1,316118  | 1,155272 | 0,104633 | 1,552772  | -1,296880 | -0,347644 | -0,347644 | -1,171951 | -1,269296 | -0,507371 |
| ID427           | ICAL                  |                     | 0,302944  | 0,476905  | -0,042490 | 1,291150 | 1,247604 | 1,516173  | -1,060443 | -1,473378 | -0,926656 | -1,168403 | -0,128023 | -0,327483 |
| ID1936868       | MRLC2                 |                     | -0,237253 | -0,165551 | -0,179144 | 0,875128 | 0,236732 | 2,292996  | -0,038194 | -0,234047 | -0,244601 | -1,159231 | -1,074631 | -0,362012 |
| ID909           | CNDP2                 | HNRH1               | 0,637771  | 0,843507  | 0,843507  | 1,138774 | 1,209419 | 1,025390  | -0,893336 | -0,800557 | -1,012284 | -1,131175 | -1,145638 | -0,823642 |
| ID294218        |                       |                     | 0,545426  | 0,796614  | 0,676707  | 1,017583 | 1,773520 | 0,101004  | -1,114060 | -0,770555 | -0,048322 | -1,126736 | -1,135004 | -0,997860 |
| ID948           |                       |                     | -0,672543 | 0,398691  | -0,240848 | 1,983199 | 1,540190 | 0,847123  | -0,196885 | -0,813897 | -1,021665 | -1,117500 | -0,283273 | -0,701967 |
| ID525           |                       |                     | 0,166148  | 0,315933  | 0,183525  | 1,297410 | 1,186062 | 1,555152  | -1,033857 | -1,230844 | -1,217476 | -1,111048 | -0,152975 | -0,235793 |
| ID576672        |                       |                     | -0,272321 | -0,670218 | 0,123535  | 2,001767 | 1,906191 | -0,170010 | -0,403827 | -0,741988 | -0,688549 | -1,105583 | -0,109733 | -0,145660 |
| ID921           | SEPT8                 | HNRH1               | 0,412383  | 0,623693  | 0,245026  | 1,198719 | 1,362055 | 1,365457  | -0,628042 | -1,207151 | -1,130477 | -1,103227 | -0,920458 | -0,493787 |
| ID412768        |                       |                     | 0,280014  | 0,635193  | 0,420391  | 1,099218 | 0,739393 | 1,610309  | -0,161029 | -1,672441 | -1,545596 | -1,103040 | -0,356035 | -0,222138 |
| ID971           | HNRH1                 | GDIB, 2ABA          | 0,407302  | 0,649640  | 0,664960  | 1,345561 | 1,103313 | 1,274512  | -1,109936 | -1,266513 | -1,134327 | -1,093937 | -0,628206 | -0,485852 |
| ID1062          |                       |                     | 0,680286  | 0,579410  | 1,196072  | 0,677815 | 0,530268 | 0,988151  | -0,562855 | 0,003982  | -1,990175 | -1,087287 | -0,528894 | -0,668595 |
| ID430           | ICAL                  |                     | 0,715060  | 0,699858  | 0,179784  | 1,419376 | 1,115540 | 1,048311  | -0,778792 | -1,386622 | -1,009353 | -1,084337 | -0,247775 | -0,942133 |
| ID1182          |                       |                     | 0,722101  | 0,154430  | 0,976618  | 1,007659 | 1,299050 | 1,304726  | -0,804849 | -1,052216 | -1,108066 | -1,081469 | -1,065040 | -0,623311 |
| ID796           | TCPQ                  | HNRPK               | 0,325803  | 0,798020  | 0,620678  | 1,081117 | 0,994288 | 1,049314  | 0,368494  | -1,417770 | -1,790258 | -1,080043 | -0,503567 | -0,716086 |
| ID458579        | PUR4                  |                     | 0,374719  | 0,611753  | 0,478146  | 1,557782 | 1,219153 | 1,047190  | -0,746227 | -1,486362 | -0,794639 | -1,074412 | -0,768691 | -0,687015 |
| ID449534        |                       |                     | 0,364768  | 0,680432  | 0,432472  | 1,054670 | 1,078978 | 1,394468  | -0,647070 | -0,932577 | -0,674049 | -1,064951 | -1,392902 | -0,560474 |
| ID1594          |                       |                     | 0,617746  | 0,749909  | 0,594174  | 1,244059 | 1,200734 | 1,085282  | -1,231349 | -1,544448 | -0,585696 | -1,059162 | -0,656730 | -0,679311 |
| ID1058          | SUCB1                 | IF34, ACTB, ACTG    | 0,401258  | 0,698808  | 0,746733  | 1,450154 | 1,163463 | 0,905730  | -0,874069 | -1,103232 | -0,281078 | -1,055441 | -1,263467 | -1,052720 |
| ID380           |                       |                     | 0,264195  | 0,230896  | 0,255735  | 1,276664 | 1,380718 | 1,344189  | -0,892689 | -1,556523 | -1,217688 | -1,055288 | -0,017104 | -0,276927 |
| ID487           | MVP                   |                     | 0,247902  | 0,395314  | 0,384228  | 1,027433 | 1,300814 | 1,511559  | -0,962524 | -1,278558 | -1,580278 | -1,046769 | -0,330835 | 0,070022  |
| ID1211          | HDGF                  |                     | 0,613304  | 1,112945  | 0,662680  | 1,546346 | 0,722024 | 0,855998  | -0,853785 | -1,052225 | -0,756414 | -1,035645 | -0,715793 | -1,358346 |
| ID2113599       |                       |                     | 0,169747  | 0,506637  | 0,182988  | 0,895504 | 1,122563 | 1,810450  | -0,553945 | -0,810070 | -1,618075 | -1,025099 | -0,684213 | -0,252761 |
| ID17135         | CAZA2                 |                     | 0,417258  | 1,194711  | 0,912746  | 1,365234 | 1,139662 | 0,342487  | -0,834335 | -0,881762 | -0,680993 | -1,021578 | -1,096218 | -1,112605 |
| ID213992        | ANXA5                 |                     | 0,559258  | 0,954889  | 0,650092  | 1,162292 | 1,002677 | 1,221014  | -1,520412 | -0,899463 | -0,590088 | -1,006980 | -1,062819 | -1,022205 |
| ID938           |                       |                     | -0,044823 | 0,193521  | 0,359234  | 1,683674 | 1,890605 | 0,103129  | -0,744019 | -0,660924 | -1,108056 | -1,001201 | -0,304245 | -0,617195 |
| ID3670          | KAP2                  | IF4A1               | -0,653728 | -0,241161 | -0,668621 | 1,617581 | 1,728055 | 1,371855  | -0,461223 | -0,870892 | -0,748291 | -0,988970 | -0,183486 | -0,148362 |
| ID1802          | PROF2                 | TR112               | 0,189941  | 0,559608  | 0,637476  | 1,704643 | 0,780178 | 1,289740  | -1,289740 | -1,246753 | -0,832709 | -0,986231 | -0,575606 | 0,394994  |
| ID348           |                       |                     | 0,065872  | 0,171752  | 0,194669  | 1,237438 | 0,877999 | 1,615402  | 0,188174  | -0,714234 | -0,965609 | -0,957916 | -0,507514 | -1,445513 |
| ID528           |                       |                     | 0,347577  | 0,701577  | 0,491785  | 1,492836 | 1,330268 | 0,901458  | -0,682337 | -1,062586 | -1,339707 | -0,956335 | -0,772981 | -0,690639 |
| ID1060          | PPME1                 |                     | 0,495391  | 0,699502  | 1,043821  | 1,448461 | 1,013313 | 0,828921  | -0,687795 | -1,295670 | -0,679957 | -0,953010 | -1,243013 | -0,908215 |
| ID973           | TBG1                  | MPPB                | 0,198868  | 0,460594  | 0,259547  | 1,582925 | 1,067803 | 1,253420  | -1,078369 | -1,437618 | -1,213687 | -0,949335 | -0,224702 | -0,156779 |
| ID496907        | CAPG                  |                     | 0,343902  | 0,641916  | 0,708894  | 1,234859 | 0,985345 | 1,497309  | -1,291077 | -1,175409 | -1,074704 | -0,944003 | -0,471895 | -0,691138 |
| ID17878         |                       |                     | 0,487464  | 0,545753  | 0,365613  | 1,835534 | 1,314468 | 0,077888  | -1,026040 | -0,563535 | -0,959838 | -0,939032 | -0,799665 | -0,573368 |
| ID1730          |                       |                     | -0,129158 | 0,216891  | -0,195130 | 0,568867 | 1,105314 | 2,159486  | -1,064615 | -1,431881 | -0,529447 | -0,924411 | -0,051986 | 0,044968  |
| ID2008587       |                       |                     | 0,211412  | 0,520254  | -0,035103 | 0,190853 | 1,615849 | 0,920896  | -0,557361 | -0,406135 | -0,131265 | -0,922999 | -0,750008 | -0,834290 |
| ID377849        | SYHC                  | VATB2, PDIA3, RUVB2 | -0,077546 | 0,332694  | 0,112091  | 1,156441 | 1,972968 | 1,982130  | -0,631022 | -1,020027 | -0,550501 | -0,917585 | -1,143229 | -0,750810 |
| ID56308         | TPM2                  |                     | 0,256294  | 0,770882  | 0,378597  | 1,107177 | 1,007642 | 1,431337  | -1,178935 | -1,336841 | -1,183145 | -0,906786 | -0,866304 | 0,293386  |
| ID517           | ACTN4                 |                     | 0,298389  | 0,355656  | 0,550035  | 1,263951 | 1,295333 | 1,437738  | -1,031048 | -1,164380 | -1,359214 | -0,903397 | -0,710789 | -0,258123 |
| ID446           | HNRPU                 | PPCE                | 0,613666  | 0,718811  | 0,537216  | 0,996005 | 0,994566 | 1,205964  | -0,396678 | -1,709364 | -0,956830 | -0,901356 | -0,799198 | -0,528141 |

Table S-4: cluster 8

| ID <sup>1</sup> | Protein <sup>12</sup> |       | co_0 min  | co_30 min | co_60 min | co_24 h  | co_48 h  | co_72 h  | PI_0 min  | PI_30 min | PI_60 min | PI_24 h   | PI_48 h   | PI_72 h   |
|-----------------|-----------------------|-------|-----------|-----------|-----------|----------|----------|----------|-----------|-----------|-----------|-----------|-----------|-----------|
| ID1610          | TEBP                  |       | 0,746089  | 0,224446  | 0,551306  | 0,953093 | 0,387915 | 1,827266 | -0,977524 | -0,905823 | -0,685462 | -0,900121 | -0,750845 | -0,695371 |
| ID2974603       |                       |       | 0,078594  | 0,629801  | -0,108608 | 1,089182 | 0,999884 | 1,614820 | -1,312059 | -1,133069 | -1,115882 | -0,873093 | 0,098558  | -0,186401 |
| ID2106278       |                       |       | 0,532574  | 0,694839  | 0,518630  | 1,141909 | 0,896575 | 1,016590 | -0,129314 | -1,747325 | -0,173930 | -0,871579 | -1,459182 | -0,637682 |
| ID125371        |                       |       | -0,356310 | -0,073433 | -0,621225 | 1,232367 | 1,803447 | 0,836629 | 0,304702  | -1,308171 | -1,048377 | -0,870142 | 0,471249  | -0,588271 |
| ID144537        | NUBP1                 |       | 0,598046  | 0,900355  | 0,565859  | 1,599105 | 1,019194 | 0,712479 | -1,225038 | -0,859134 | -0,314132 | -0,853204 | -1,246222 | -1,110609 |
| ID1544          |                       |       | 0,354117  | 0,600544  | 0,194322  | 1,052847 | 0,782319 | 0,981146 | -0,713585 | -0,941827 | -0,463487 | -0,848397 | -0,619228 | -0,590870 |
| ID1210          | TPM2                  |       | 0,227555  | 0,963005  | 0,233490  | 1,684537 | 1,123214 | 0,393909 | 0,057322  | -1,262744 | -0,624649 | -0,844312 | -1,432318 | -0,730087 |
| ID85707         |                       |       | 0,434417  | 0,859381  | 0,594219  | 0,925659 | 1,223357 | 1,225260 | -0,773187 | -1,090068 | -0,667158 | -0,824707 | -1,006821 | -1,106529 |
| ID1596          | BID                   | RBM8A | 0,259878  | 0,794515  | 0,253711  | 1,721525 | 1,081518 | 0,566120 | 0,178271  | -1,056033 | -0,892635 | -0,819746 | -0,415466 | -1,876595 |
| ID618           | KU86                  | HS90A | 0,151320  | 0,326578  | 0,280036  | 1,253258 | 1,408255 | 1,433536 | -0,904597 | -1,487822 | -1,349394 | -0,790372 | -0,112449 | -0,405941 |
| ID2190755       |                       |       | 0,304723  | 0,482400  | 0,441128  | 1,058762 | 1,785973 | 0,821546 | -0,998938 | -0,646049 | -0,640251 | -0,790234 | -1,235151 | -0,781468 |
| ID1369          | TPM4                  |       | 0,227588  | 0,603991  | 0,355814  | 1,384440 | 1,366123 | 1,298336 | -0,849099 | -1,494358 | -1,116736 | -0,774788 | -0,742978 | -0,452031 |
| ID398           |                       |       | 0,356167  | 0,558296  | 0,235092  | 1,111509 | 1,382665 | 1,419780 | -1,029694 | -1,455602 | -1,294807 | -0,767488 | -0,319200 | -0,388589 |
| ID822           | HSP7C                 | AINX  | 0,070982  | 0,680415  | 0,253378  | 1,456491 | 1,253110 | 0,870246 | -0,167232 | -1,429191 | -1,706300 | -0,760553 | -0,660658 | -0,050825 |
| ID8503          |                       |       | -0,266523 | -0,130752 | 0,140598  | 1,463366 | 1,221563 | 1,796391 | -0,839152 | -0,955209 | -1,413530 | -0,750444 | -0,425369 | -0,028551 |
| ID520           | NUCL                  |       | 0,282947  | 0,286309  | 0,234609  | 1,159032 | 1,238644 | 1,514769 | -0,945384 | -1,607696 | -1,296661 | -0,725030 | -0,076597 | -0,246200 |
| ID25932         |                       |       | 0,581620  | 0,574915  | 0,501683  | 1,209853 | 1,101845 | 0,767174 | -0,755009 | -1,401366 | -0,863858 | -0,718023 | -0,277508 | -0,900831 |
| ID2023391       |                       |       | 0,622593  | 1,189999  | 0,476824  | 1,075897 | 0,727224 | 1,262409 | -0,889116 | -0,917907 | -0,357968 | -0,699985 | -1,257876 | -1,407091 |
| ID126195        | ICAL                  |       | 0,325769  | 0,509950  | 0,087460  | 0,972248 | 1,140105 | 1,712379 | -1,391612 | -1,560363 | -0,920038 | -0,695119 | -0,127303 | -0,227256 |
| ID119751        |                       |       | 0,484811  | 0,736574  | 0,026011  | 1,031012 | 1,017214 | 1,669433 | -1,264355 | -0,784226 | -1,486207 | -0,688046 | -0,605050 | -0,309182 |
| ID115953        |                       |       | -0,270426 | 0,756762  | -1,158786 | 0,970237 | 0,774825 | 1,366148 | -1,274630 | -0,135820 | 0,100320  | -0,678836 | -0,259488 | -0,360015 |
| ID1354          | C1QBP                 |       | -0,285745 | 0,683244  | -0,430197 | 1,748955 | 1,094729 | 1,433577 | -0,053943 | -1,017334 | -0,507256 | -0,673147 | -1,149500 | -1,011672 |
| ID328907        |                       |       | 0,185030  | 0,792360  | -1,302818 | 1,070265 | 0,536051 | 1,805408 | -0,467644 | -0,576140 | -0,713950 | -0,672291 | -0,776435 | -0,047908 |
| ID405           | NASP                  |       | 0,164529  | 0,545116  | 0,054625  | 0,838123 | 1,127412 | 1,874707 | -0,702378 | -1,661492 | -1,120262 | -0,671715 | 0,120012  | -0,736605 |
| ID574393        |                       |       | 0,527383  | 0,651847  | 0,419773  | 1,232001 | 1,036275 | 1,402078 | -1,070249 | -1,182343 | -1,135137 | -0,669525 | -0,759382 | -0,620102 |
| ID524           |                       |       | 0,099051  | 0,445433  | 0,298316  | 1,371374 | 1,172558 | 1,416220 | -1,129406 | -0,715720 | -1,434155 | -0,660782 | -0,664712 | -0,363373 |
| ID387435        | FKB10                 |       | 0,132709  | 0,279091  | 0,335575  | 0,832993 | 0,713869 | 2,129766 | -0,296093 | -1,620981 | -1,139659 | -0,642505 | -0,561567 | -0,323825 |
| ID1431          |                       |       | -0,448068 | 0,690792  | 0,137880  | 0,613658 | 1,114184 | 1,787188 | -1,638816 | 0,337728  | -0,131928 | -0,627474 | -1,275595 | -0,716419 |
| ID320497        |                       |       | 0,397896  | 0,613398  | 0,178386  | 0,871667 | 1,170050 | 1,747136 | -0,969928 | -0,896244 | -1,377221 | -0,626506 | -0,334003 | -0,931258 |
| ID1440          | CAPZB                 |       | 0,216656  | 0,899283  | 0,630700  | 0,949267 | 1,069443 | 1,462392 | -1,030983 | -0,949288 | -0,429903 | -0,577353 | -1,122116 | -1,262436 |
| ID1391          | 1433E                 | CLIC1 | 0,046165  | 0,489811  | 0,522993  | 1,361240 | 1,128350 | 1,428686 | -1,462361 | -1,177708 | -0,746726 | -0,575330 | -0,747619 | -0,411333 |
| ID139104        |                       |       | -0,241272 | 0,142022  | 0,398260  | 0,406216 | 0,790110 | 2,395130 | -0,394071 | -1,140715 | -0,464890 | -0,536957 | -0,445415 | -1,042658 |
| ID24119         |                       |       | -0,779854 | -0,396576 | -0,455329 | 1,197910 | 1,175604 | 2,335582 | -0,699375 | -0,320377 | -0,586699 | -0,523468 | -0,352811 | -0,725475 |
| ID2010414       | BCCIP                 | ACTG  | -0,641219 | 0,439088  | -0,614799 | 0,513112 | 1,237499 | 1,619187 | -0,510615 | -0,488588 | -0,415474 | -0,514190 | 0,163067  | -0,915618 |
| ID797           | HNRPK                 | HSP7C | -0,074571 | 0,531416  | 0,344178  | 0,834285 | 0,630825 | 1,605107 | 0,977650  | -0,968374 | -1,894782 | -0,508786 | -0,511189 | -1,092957 |
| ID1437          |                       |       | 0,198971  | 0,714319  | 0,229677  | 1,384490 | 1,072796 | 1,293964 | -1,048653 | -0,984796 | -0,507916 | -0,477719 | -0,396862 | -1,597700 |
| ID414           |                       |       | 0,362240  | 0,579685  | 0,403184  | 1,232664 | 1,048707 | 1,564172 | -0,552315 | -1,341614 | -1,425799 | -0,470755 | -0,886907 | -0,630950 |
| ID2555205       |                       |       | 0,082093  | 0,047732  | 0,665699  | 0,668810 | 1,466805 | 1,007514 | -0,392245 | -1,772659 | -0,515023 | -0,465754 | -0,255854 | -0,653556 |
| ID457100        |                       |       | -0,096013 | 0,191074  | 0,120297  | 1,349385 | 1,289746 | 1,731126 | -0,397403 | -1,445584 | -1,050725 | -0,462370 | -0,780668 | -0,564188 |
| ID527           |                       |       | 0,046955  | 0,156755  | -0,153676 | 0,655661 | 0,888673 | 2,233427 | -1,304383 | -0,405547 | -1,314935 | -0,430871 | -0,565713 | 0,085937  |
| ID315205        |                       |       | 0,227115  | -0,234485 | -0,124887 | 1,317685 | 1,718172 | 1,166425 | -0,446481 | -1,600932 | -1,076631 | -0,422909 | -0,256945 | -0,371853 |
| ID318           | GRP78                 |       | 0,391332  | 0,462790  | 0,340049  | 0,556680 | 1,008081 | 0,588954 | -0,206489 | -0,223605 | -1,988848 | -0,390767 | 0,084222  | -0,581464 |
| ID523           |                       |       | 0,450950  | 0,600392  | 0,146786  | 1,279210 | 0,753690 | 1,609864 | -0,703695 | -0,477704 | -1,246040 | -0,360836 | -1,121685 | -1,021140 |
| ID2064822       |                       |       | 0,286333  | 0,418424  | 0,277458  | 1,423711 | 1,199879 | 1,235126 | -0,815490 | -1,304527 | -1,095308 | -0,358456 | -0,804897 | -0,551867 |
| ID2057395       |                       |       | 0,223741  | 0,371501  | -0,038222 | 1,217900 | 0,990641 | 1,915281 | -0,973093 | -1,196061 | -1,292903 | -0,102936 | -0,597978 | -0,543606 |
| ID415           | HNRPU                 | PPCE  | 0,588493  | 0,883102  | 0,559196  | 0,929917 | 0,963427 | 1,288345 | -0,361477 | -1,124051 | -0,991696 | -0,048157 | -1,386411 | -1,312727 |
| ID2060826       |                       |       | 0,147502  | 0,364909  | -0,093586 | 1,217166 | 0,702410 | 2,028366 | -0,901495 | -1,102633 | -1,159534 | 0,142296  | -0,638233 | -0,671594 |
| ID3102815       | PR56A                 | TXND5 | 0,116802  | 0,851947  | 0,532020  | 0,993326 | 0,909546 | 1,446888 | -0,425384 | -0,904307 | -1,203067 | 0,305197  | -1,238640 | -1,308030 |
| ID393           | ITA3                  |       | 0,057761  | 0,390252  | 0,286114  | 0,817389 | 1,269717 | 1,715709 | -0,423703 | -1,205763 | -0,764021 | 0,489936  | -1,374622 | -1,136286 |

Table S-4: cluster 9

| Cluster 9       |                       | Z-score <sup>13</sup> |           |           |           |           |           |           |           |           |           |           |           |
|-----------------|-----------------------|-----------------------|-----------|-----------|-----------|-----------|-----------|-----------|-----------|-----------|-----------|-----------|-----------|
| ID <sup>1</sup> | Protein <sup>12</sup> | co_0 min              | co_30 min | co_60 min | co_24 h   | co_48 h   | co_72 h   | PI_0 min  | PI_30 min | PI_60 min | PI_24 h   | PI_48 h   | PI_72 h   |
| ID1814025       | PPT1                  | 0,203703              | 0,201255  | 0,204382  | 0,225913  | 0,210850  | 0,204686  | 0,334077  | 0,289999  | 0,263926  | 0,258387  | -4,356112 | 0,157513  |
| ID1085          |                       | 0,320688              | 0,357658  | 0,318090  | 0,356199  | 0,396200  | 0,354456  | 0,258678  | 0,303439  | 0,287416  | 0,222944  | -3,157672 | 0,207226  |
| ID319           |                       | 0,270639              | 0,270842  | 0,263794  | 0,296324  | 0,292839  | 0,286613  | 0,247041  | 0,240335  | 0,215910  | 0,246918  | -2,775427 | 0,205903  |
| ID2198480       |                       | 0,360100              | 0,363383  | 0,364629  | 0,376973  | 0,423782  | 0,376582  | 0,350954  | 0,344562  | 0,338607  | -1,764074 | -2,721816 | -1,231214 |
| ID2218268       |                       | 0,399885              | 0,405152  | 0,399872  | 0,373349  | 0,436887  | -0,379136 | 0,376898  | 0,381603  | 0,386514  | 0,187112  | -2,642773 | -1,254997 |
| ID2201032       |                       | 0,377422              | 0,380568  | 0,379068  | 0,396400  | 0,431073  | 0,463781  | 0,358485  | 0,340158  | 0,355667  | 0,303436  | -2,610218 | -2,610218 |
| ID2302886       |                       | 0,232420              | 0,397025  | 0,372845  | 0,775513  | 0,546006  | 0,390243  | -0,206518 | -0,173963 | -0,006784 | -0,170737 | -2,583712 | 0,384978  |
| ID2592168       |                       | 0,404942              | 0,241521  | 0,366601  | 0,392213  | 0,389410  | 0,442359  | #DIV/0!   | 0,465251  | 0,422266  | 0,359537  | -2,501038 | -1,622815 |
| ID1293          | ANXA3                 | 0,157072              | 0,708105  | 0,677622  | 0,742527  | 0,510471  | 0,688679  | 0,277921  | 0,234563  | 0,300150  | -0,198917 | -2,360006 | -1,787917 |
| ID2117397       | VINC                  | 0,545907              | 0,567223  | 0,534176  | 0,890964  | 0,631422  | 0,871009  | 0,017459  | -0,097992 | 0,163835  | -0,544833 | -2,333220 | -1,382159 |
| ID1763758       | SCMC1                 | 0,227886              | 0,227592  | 0,223820  | 0,263757  | 0,249396  | 0,243443  | 0,200201  | 0,165176  | 0,185911  | 0,195747  | -2,270912 | 0,136920  |
| ID2024619       |                       | 0,213453              | 0,493498  | 0,298398  | 1,013943  | 1,183497  | 0,442597  | -0,067734 | -0,419384 | 0,270675  | -0,212424 | -2,168991 | -1,100635 |
| ID3022983       |                       | 0,578075              | 0,739627  | 0,653142  | 0,154690  | 0,131099  | 0,192007  | 0,687525  | 0,644748  | 0,670350  | -0,436238 | -2,153046 | -1,971039 |
| ID418384        |                       | 0,382015              | 0,655522  | 0,974584  | -0,169563 | 0,672090  | 0,952335  | 0,352018  | -0,361498 | 0,770358  | -0,699598 | -2,133976 | -1,569187 |
| ID2296834       |                       | 0,469117              | 0,471661  | 0,465403  | 0,468825  | -0,175615 | 0,453402  | 0,470525  | 0,467018  | 0,469463  | -2,125250 | -2,125250 | -0,495897 |
| ID1315          |                       | 0,213619              | 0,614411  | 0,167339  | 0,715703  | 1,089796  | 1,337892  | 0,345891  | -0,173979 | 0,034796  | -1,118065 | -2,100416 | -1,406503 |
| ID1864541       |                       | 0,321260              | 0,434698  | 0,493967  | 0,599630  | 0,826608  | 0,749165  | -0,313292 | 0,381869  | 0,225017  | -0,523955 | -2,097170 | -1,228787 |
| ID981           |                       | -0,021957             | 0,579922  | 0,487048  | 1,907608  | 0,564946  | 0,103109  | 0,173850  | 0,109633  | -0,336750 | -0,203323 | -2,040128 | -1,374789 |
| ID1765003       |                       | 0,371465              | 0,368444  | 0,368460  | 0,352805  | 0,387690  | 0,348764  | 0,361676  | 0,340181  | 0,355279  | 0,326353  | -2,022814 | -2,759584 |
| ID447263        | HNRH1                 | 0,416786              | 0,719401  | 0,475497  | 0,115983  | 0,631498  | 0,190652  | 0,247273  | 0,993913  | 0,655786  | -1,505993 | -2,007593 | -1,309701 |
| ID1755          | MYL6                  | -0,034976             | 0,770527  | 0,132220  | 1,374092  | 0,849919  | 1,013838  | -0,323531 | -0,122346 | 0,367006  | -0,599545 | -1,980356 | -1,596734 |
| ID1248          | RLA0                  | 0,304413              | 0,905049  | 1,002414  | 1,375797  | 0,612803  | 0,580570  | -0,461269 | -0,660549 | -0,607786 | 0,079680  | -1,965655 | -1,145547 |
| ID1086          | K1C18                 | 0,310449              | 0,518882  | 0,172197  | 0,776749  | 0,364927  | 0,621085  | 0,964689  | 0,535806  | 0,473812  | -1,679779 | -1,964136 | -1,514626 |
| ID2214019       | ACTB                  | 0,467441              | 0,485346  | 0,476253  | 0,519090  | 0,514827  | 0,496820  | #DIV/0!   | 0,461129  | 0,610305  | -1,182066 | -1,963754 | -0,187194 |
| ID1036          |                       | 0,308763              | 0,435132  | 1,400554  | 0,358006  | 0,795714  | 0,546957  | -0,333726 | -0,491778 | 0,086678  | 0,637479  | -1,931930 | -1,652477 |
| ID2027812       |                       | 0,503391              | 0,538429  | 0,499223  | 0,569985  | 0,569736  | 0,536513  | -1,297984 | 0,487094  | -0,126852 | 0,491284  | -1,890288 | -0,102191 |
| ID2669          |                       | 0,058649              | 0,770543  | 0,445653  | 1,421361  | 0,849595  | 0,460689  | -0,575300 | 0,581670  | 0,030886  | -1,372878 | -1,866131 | -1,147957 |
| ID1847793       |                       | -0,203143             | 0,081082  | -0,243749 | 1,228021  | 1,498744  | 1,102139  | -0,336232 | 0,142269  | 0,192422  | -0,150952 | -1,864717 | -1,483620 |
| ID950           | SHLB2                 | 0,073890              | 0,794612  | 0,789380  | 1,411865  | 0,189308  | -0,425743 | 0,509815  | 0,628910  | 0,138867  | -1,642350 | -1,862904 | -1,016237 |
| ID295167        | COPE                  | 0,704084              | 0,986691  | 1,181319  | 0,399651  | -0,069735 | 0,240437  | 0,306874  | -0,128254 | 0,680650  | -0,783900 | -1,855716 | -1,858366 |
| ID1647          | MLRM                  | 0,258681              | 0,724780  | 0,671081  | 0,879422  | 0,406604  | 0,414916  | -0,020422 | 0,969524  | 0,335032  | -1,517155 | -1,850370 | -1,651382 |
| ID923           | HNRH1                 | 0,144614              | 0,595815  | 0,538385  | 0,725320  | 0,832722  | 1,332252  | 0,457147  | 0,066177  | -0,245261 | -1,620595 | -1,844333 | -1,387393 |
| ID1008          | ACTG                  | 0,522735              | 0,518253  | 1,204789  | 0,894275  | -0,220837 | 1,476111  | -0,323176 | -0,129466 | -0,058578 | -0,804896 | -1,829131 | -1,451303 |
| ID1080          | ACTG                  | 0,998326              | 1,182627  | 1,231544  | 0,782324  | 0,356936  | 0,397626  | -0,160554 | -0,097225 | -0,619992 | -1,195567 | -1,807075 | -1,367862 |
| ID206082        | GANAB                 | 0,592306              | 0,470851  | 0,964561  | 0,649564  | 0,504336  | 1,119343  | -0,001703 | -1,468293 | 0,390499  | -0,999668 | -1,773239 | -0,698475 |
| ID496           |                       | 0,534604              | 0,790292  | 0,788530  | 0,432712  | 0,622629  | 1,245481  | -0,123077 | -0,120685 | 0,261905  | -1,053465 | -1,765175 | -1,877117 |
| ID169541        |                       | 0,337529              | 0,639935  | 0,285000  | 1,151482  | 0,442730  | 0,168752  | 0,693300  | 0,055837  | -0,123207 | 0,518078  | -1,762614 | -2,277304 |
| ID210320        |                       | 1,142546              | 1,423348  | 1,371116  | 0,562134  | -0,096459 | 0,352109  | -0,214188 | -0,507166 | -0,710479 | -0,473367 | -1,755008 | -1,212928 |
| ID1982157       |                       | 0,925109              | 1,075947  | 0,924004  | 0,552258  | 0,310086  | 0,140928  | 0,073313  | 0,167662  | 0,366817  | -1,123902 | -1,743744 | -1,949453 |
| ID15367         |                       | 0,396009              | 0,695482  | 0,586388  | 0,556458  | -0,039118 | 0,488331  | 0,450651  | 0,529271  | 0,338422  | -1,145258 | -1,736899 | -1,406050 |
| ID1215          | SEC13                 | 0,550533              | 0,662426  | 0,769879  | 0,738737  | -0,146813 | 0,286555  | -0,024824 | 1,148507  | 0,564428  | -1,378954 | -1,733441 | -1,781769 |
| ID1325          | WDR61                 | 0,555475              | 1,067640  | 0,740250  | 0,676365  | 0,458307  | 0,371126  | 0,254749  | 0,367194  | 0,090537  | -1,075157 | -1,732255 | -2,043020 |
| ID422947        | GSTO1                 | 0,460646              | 0,901167  | 0,854948  | 0,783279  | 0,649984  | 0,369617  | -0,384245 | -0,818573 | -0,409659 | -0,443381 | -1,727792 | -1,346835 |
| ID1740          | MYL6                  | -0,165834             | 0,996262  | 0,078658  | 1,833408  | 0,743925  | 0,292474  | -0,134953 | -0,947789 | -0,109887 | 0,682999  | -1,727246 | -1,371268 |
| ID1953484       | MLRN                  | -0,132383             | -0,170514 | 0,274103  | 1,593232  | 0,722714  | 0,057266  | 0,020132  | 0,796781  | 0,423213  | -0,643913 | -1,704035 | -1,397574 |
| ID1327          | TPM1                  | 0,545657              | 0,605883  | -0,627684 | 0,593831  | 0,607890  | 0,584405  | 0,569710  | 0,546225  | 0,594006  | -0,219178 | -1,694063 | -1,694063 |
| ID3543802       |                       | 0,534197              | 1,325420  | 1,124974  | 1,447755  | 0,137631  | -0,490372 | -0,005396 | -0,212822 | -0,583515 | -0,301080 | -1,679382 | -1,372681 |
| ID2215889       |                       | 0,186164              | 0,590660  | 0,654421  | 0,907250  | 0,503834  | 1,098481  | 0,265393  | 0,023511  | -0,273337 | -1,288707 | -1,677939 | -1,311907 |
| ID55610         |                       | -0,046709             | 0,345425  | 0,027928  | 1,076473  | 1,498934  | 1,528462  | 0,108872  | -0,624707 | -0,265986 | -1,105091 | -1,667863 | -1,152010 |
| ID365           | HYOU1                 | 0,440023              | 1,212874  | 0,711141  | 0,845017  | 0,589278  | 0,168417  | -0,769710 | -0,176613 | -0,156520 | 0,955368  | -1,666250 | -1,914184 |
| ID993           | GDIB                  | 0,631078              | 0,991643  | 1,362553  | 1,053495  | 0,532904  | 0,692762  | -0,660338 | -0,613143 | -0,519434 | -1,158296 | -1,647293 | -0,955507 |
| ID1750          | 0,853277              | 0,804043              | 1,468983  | 0,113032  | 0,550155  | 0,616330  | -0,078063 | -0,650868 | -0,085459 | -0,374765 | -1,646415 | -1,663941 |           |
| ID3046761       | 0,334972              | 0,580667              | 0,949622  | 1,035667  | 0,647582  | -0,451947 | -0,244439 | 0,373123  | 0,448212  | -0,021257 | -1,645968 | -2,011547 |           |
| ID1758          | 0,504389              | 0,982339              | 1,169678  | 0,519105  | 0,081309  | -0,024331 | -0,229617 | 1,387491  | -0,361220 | -1,269977 | -1,644338 | -1,432320 |           |
| ID1164          | 0,487866              | 1,083450              | 0,774405  | 0,616093  | 0,888860  | -1,001534 | -0,246085 | -0,510281 | 0,609743  | -0,640757 | -1,615839 | -1,615839 |           |
| ID1260          | 0,323275              | 1,064115              | 1,329013  | 0,666802  | 0,387634  | 0,692308  | 0,355150  | -0,156107 | -0,649688 | -1,391370 | -1,626130 | -1,342845 |           |
| ID509           | GANAB                 | 0,119560              | 0,396455  | 0,275446  | 0,266747  | 0,509115  | 2,349272  | -0,108047 | -0,082827 | -0,145328 | -0,597948 | -1,617064 | -1,514868 |

Table S-4: cluster 9

| ID <sup>1</sup> | Protein <sup>12</sup> |                   | co_0 min  | co_30 min | co_60 min | co_24 h   | co_48 h   | co_72 h   | PI_0 min  | PI_30 min | PI_60 min | PI_24 h   | PI_48 h   | PI_72 h   |
|-----------------|-----------------------|-------------------|-----------|-----------|-----------|-----------|-----------|-----------|-----------|-----------|-----------|-----------|-----------|-----------|
| ID1603          | TBA1C                 | PTRF, TBA4A, TBB5 | 0,402124  | 0,404582  | 0,403205  | 0,426998  | 0,441804  | 0,422658  | 0,378472  | 0,369489  | 0,383158  | -0,596151 | -1,615053 | -2,484846 |
| ID906           |                       |                   | 0,523970  | 0,540462  | 1,057750  | 1,176802  | 0,520499  | 0,076129  | -0,095943 | 0,791726  | -0,571726 | -1,249741 | -1,578102 | -1,504261 |
| ID1538          |                       |                   | -0,133313 | 1,163237  | -0,100537 | 0,734959  | 0,310561  | 0,974473  | 0,757656  | -0,607327 | 0,636581  | -0,598008 | -1,560076 | -1,727707 |
| ID499           | GANAB                 | IMMT              | 0,677694  | 0,819925  | 1,141919  | 0,156665  | 0,513788  | 1,272129  | 0,119311  | -0,711659 | 0,160230  | -1,328805 | -1,554757 | -1,598641 |
| ID2021577       |                       |                   | 0,547581  | 0,971165  | 0,688553  | 0,782974  | 0,537959  | 0,757700  | -0,848743 | -0,613574 | 0,658393  | -1,533655 | -1,533655 | -1,586141 |
| ID1255          | ODPB                  | HNRPF             | 0,279179  | 0,986021  | 0,817413  | 1,121324  | 1,065541  | 0,960797  | -0,274518 | -0,577440 | -0,455887 | -1,187281 | -1,526673 | -1,505296 |
| ID364919        |                       |                   | 0,949040  | 1,362730  | 0,744586  | 0,277180  | 0,323844  | 0,533454  | -0,589722 | 0,757429  | -0,451066 | -0,798031 | -1,506078 | -1,802874 |
| ID13616         | DNJC9                 | PSME3             | 0,080016  | 0,401470  | 0,540250  | 1,460397  | 0,736452  | 0,976543  | 0,459487  | -0,363705 | -0,609881 | -0,409118 | -1,504492 | -1,869699 |
| ID435879        |                       |                   | 1,065305  | 1,504905  | 1,634960  | 0,426011  | -0,313280 | -0,818843 | -0,312029 | -0,080784 | 0,032818  | -0,392457 | -1,502014 | -1,342707 |
| ID1301          | HSB11                 | ARP3, QCR1, PDIA3 | 0,394203  | 0,451800  | 0,476191  | 0,531355  | 0,671515  | 0,652293  | 0,329971  | 0,267098  | 0,316574  | -0,498969 | -1,498351 | -2,218423 |
| ID1672          |                       |                   | -0,050644 | 0,678060  | 0,304098  | 1,459077  | 0,814983  | 0,082099  | 0,146735  | -0,780040 | 0,816470  | -0,184648 | -1,495729 | -1,836624 |
| ID964           |                       |                   | 0,640717  | 0,805065  | 0,463229  | 0,593003  | 0,873003  | 0,763183  | 0,595183  | -0,169567 | -0,042305 | -1,950038 | -1,495110 | -1,563872 |
| ID900           | K2C8                  |                   | 0,690293  | 0,534133  | 1,051506  | 0,420811  | -0,101614 | -0,161829 | 1,343080  | -0,099138 | 0,587431  | -1,367408 | -1,489283 | -1,749835 |
| ID16755         |                       |                   | 0,889803  | 1,005758  | 0,678060  | 0,420811  | -0,101614 | -0,161829 | 1,343080  | -0,099138 | 0,587431  | -1,367408 | -1,489283 | -1,749835 |
| ID2087348       | SNAAP                 | SFRS1             | 0,597112  | 0,866543  | 0,408678  | 0,999736  | 0,983557  | 0,265448  | 0,053356  | 0,106669  | -0,213883 | -2,217834 | -1,485779 | -0,918062 |
| ID2990527       |                       |                   | 0,339455  | 0,349394  | 0,328915  | 0,360301  | 0,345651  | 0,315922  | 0,347485  | 0,360297  | 0,340899  | 0,136734  | -1,485090 | -2,044608 |
| ID1305          |                       |                   | 0,575356  | 0,777261  | 0,764633  | 1,089565  | 1,312789  | 0,729657  | -0,627072 | -0,564585 | -0,105030 | -1,233630 | -1,480920 | -2,546431 |
| ID1186          | PP1B                  | NAGK              | 0,319213  | 1,354673  | 0,978391  | 1,662245  | 0,102191  | -0,219074 | -0,299579 | 0,030600  | -1,013504 | -1,009815 | -1,469297 | -0,688498 |
| ID3352574       |                       |                   | 1,095244  | 1,543132  | 0,943683  | 0,335787  | 0,105228  | 0,405011  | 0,084626  | -0,412646 | -0,663428 | -1,291725 | -1,464235 | -1,003608 |
| ID1762          | TADBP                 |                   | -0,039426 | 1,048137  | 0,300496  | 1,068117  | 0,459611  | 0,250170  | 0,795348  | 0,252742  | 0,039782  | -1,418778 | -1,462296 | -1,648598 |
| ID29100         |                       |                   | 0,594689  | 0,920987  | 1,040451  | 0,744019  | 1,053472  | 0,987125  | -0,942840 | -0,310152 | -0,568324 | -1,451313 | -1,462036 | -0,968905 |
| ID1720          |                       |                   | 0,062005  | 0,133322  | 0,211002  | 0,258889  | 0,772270  | 1,279819  | -0,461246 | 0,688331  | 0,220619  | -0,606147 | -1,458073 | -1,252327 |
| ID1763803       | RSSA                  | SET               | 0,525635  | 0,567735  | 0,544341  | 0,778798  | 0,687394  | 0,007836  | -0,629727 | 0,107162  | -1,750644 | -1,455047 | -0,592890 | -0,592890 |
| ID2292906       |                       |                   | 0,426583  | 0,655943  | 0,413271  | 1,687879  | 0,579427  | -0,011192 | -0,565815 | -0,256637 | -0,425491 | 0,701637  | -1,455025 | -1,575172 |
| ID1156          |                       |                   | 0,771280  | 1,357380  | 0,458837  | 0,366789  | 0,431851  | 1,275980  | -0,395708 | -0,643242 | -0,050374 | -0,344372 | -1,443710 | -1,870804 |
| ID631           | IMMT                  | PLOD3, THOP1      | 0,100986  | 0,270395  | 0,457641  | 0,434122  | 0,819040  | 0,836758  | 1,077243  | -0,544888 | 0,922860  | -1,729779 | -1,440198 | -1,636623 |
| ID510           |                       |                   | 0,768848  | 1,047871  | 1,027292  | 0,387616  | 0,396892  | 1,018476  | -0,223002 | -0,048367 | -0,128408 | -2,124918 | -1,439443 | -1,214086 |
| ID3760549       | SF3A3                 | ENOG              | 0,506288  | 0,840578  | 0,852445  | 0,730968  | 0,789118  | 0,814732  | 0,591889  | -0,033930 | -1,285415 | -1,211107 | -1,428432 | -1,469912 |
| ID93790         |                       |                   | 0,065545  | 0,415404  | -0,022165 | 1,836706  | 1,320652  | 0,838954  | -0,176352 | -0,403937 | -0,333925 | -0,901239 | -1,426887 | -1,438065 |
| ID1295          | APMAP                 | SNX6              | 0,100777  | 0,784129  | -0,363283 | 0,858967  | 0,632591  | 0,922519  | 0,170717  | -0,143142 | -0,001705 | -0,220779 | -1,422830 | -1,373156 |
| ID978           |                       |                   | -0,337115 | -0,136660 | 0,889902  | 0,727952  | 0,881764  | 0,393184  | 0,745091  | -0,853591 | 1,156787  | -0,517940 | -1,420820 | -1,658038 |
| ID1589          |                       |                   | 0,002757  | 0,683856  | 0,109926  | 1,231825  | 0,790864  | 0,847236  | 0,531499  | 0,360864  | -0,116944 | -2,127903 | -1,419545 | -1,426412 |
| ID3499167       | SORCN                 |                   | 0,494639  | 0,495709  | 0,498620  | 0,516702  | 0,510425  | 0,532390  | 0,502493  | 0,505150  | 0,504001  | -1,975798 | -1,407710 | -1,404376 |
| ID1303          |                       |                   | 0,805777  | 1,370975  | 1,353720  | 0,918640  | 0,296386  | 0,022984  | -1,162680 | -0,402028 | -0,535175 | -0,915664 | -1,403020 | -0,578831 |
| ID1358          |                       |                   | 0,503595  | 0,780528  | 0,911156  | 0,796509  | 1,183279  | 1,033505  | -0,675076 | -0,445783 | -0,064064 | -1,538115 | -1,388692 | -1,481371 |
| ID112515        | RSSA                  | 3HIDH             | 0,327748  | 0,627397  | 0,326851  | 1,303470  | 0,682131  | 0,095673  | 0,406068  | 0,557750  | 0,006300  | -1,734693 | -1,381498 | -1,650870 |
| ID1098          |                       |                   | 0,705869  | 1,151122  | 1,543160  | 0,859525  | 0,015413  | -0,941148 | 0,002917  | -0,265809 | -0,526946 | 0,570663  | -1,378655 | -1,593443 |
| ID99319         | PDIA1                 |                   | 0,330368  | 1,082891  | 0,457787  | 0,455375  | 0,219198  | -0,157043 | 0,110367  | 0,770677  | 0,445265  | -0,201063 | -1,364501 | -2,199586 |
| ID2287478       |                       |                   | 0,517251  | 0,849496  | 0,710980  | 1,058419  | 0,665566  | 0,463994  | -0,231659 | -0,125310 | 0,113258  | -2,164863 | -1,360927 | -1,578636 |
| ID1665          | KCRB                  |                   | 1,172847  | 1,021581  | 2,090236  | -0,347214 | -0,396532 | -0,753586 | 0,024748  | 0,007293  | -0,025817 | -0,335267 | -1,355559 | -1,186546 |
| ID207376        |                       |                   | 0,378800  | 0,888570  | 1,104791  | 0,665975  | 0,169896  | 0,603721  | 0,440726  | 0,179414  | -0,423051 | -0,424205 | -1,345524 | -2,345163 |
| ID3763691       |                       |                   | 0,653061  | 1,005094  | 0,620382  | 0,664319  | 1,156113  | -0,232541 | -0,054019 | -0,516519 | -0,301897 | -0,266454 | -1,342439 | -1,451712 |
| ID1282          | ODPB                  | CSN6, GBB2, GBB1  | 0,106345  | 0,441550  | 0,237916  | 0,990436  | 1,245931  | 1,181816  | -0,029730 | 0,187670  | -0,116526 | -2,194984 | -1,340672 | -1,258500 |
| ID1553          |                       |                   | 0,935391  | 1,423655  | 1,897757  | -0,010578 | -0,037746 | -0,019569 | -0,500708 | -0,500708 | -0,356960 | -0,706307 | -1,338805 | -1,312381 |
| ID904           | TBA1B                 | TBB5              | 0,610056  | 0,541858  | 1,321549  | 0,417665  | -0,007252 | -0,505975 | 0,145263  | 1,384522  | -1,182790 | -0,894717 | -1,336551 | -0,717306 |
| ID659           |                       |                   | -0,047979 | 0,321174  | -0,122100 | 0,477592  | 0,951521  | 1,103180  | 0,556569  | 0,617144  | 0,650986  | -1,675225 | -1,335883 | -1,915786 |
| ID709           | LMNB1                 |                   | 0,195715  | -0,509975 | 0,637984  | 0,049838  | 0,462621  | 0,993493  | 0,764015  | 0,096787  | 0,411212  | -0,611874 | -1,335321 | -2,307464 |
| ID8700          |                       |                   | 1,408630  | 1,188732  | 1,234259  | -0,476571 | -0,718109 | 0,287540  | 0,137322  | 0,489422  | -0,099263 | -1,993768 | -1,325472 | -0,631165 |
| ID461679        | ACTN4                 | MVP               | 0,666837  | 0,642322  | 1,282839  | 0,359737  | 0,637753  | 1,482310  | -0,202423 | -1,291579 | -0,456035 | -0,622768 | -1,322035 | -1,332649 |
| ID568037        |                       |                   | 0,396007  | 0,628180  | 0,408782  | 0,969900  | 1,310265  | -0,573730 | 0,413596  | 0,234598  | -1,256387 | -1,320595 | -1,288893 | -1,288893 |
| ID191574        |                       |                   | 0,888769  | 1,301301  | 1,158426  | -0,021813 | 0,580403  | 0,789844  | -0,429138 | -1,348559 | -0,060703 | -1,296515 | -1,306820 | -0,579322 |
| ID99730         | RD23B                 | PDIA1             | 0,305605  | 0,333149  | 0,411375  | 0,159896  | 0,716521  | 0,196582  | 0,765430  | 0,429427  | 0,234547  | 0,442098  | -1,303487 | -2,580619 |
| ID1026          |                       |                   | -0,381788 | 0,273174  | -0,247437 | 0,947049  | 0,967410  | 0,771192  | 0,342687  | 0,750932  | 0,689744  | -1,074157 | -1,292613 | -2,014731 |
| ID1980598       | #DIV/0!               | #DIV/0!           | #DIV/0!   | #DIV/0!   | #DIV/0!   | 0,467425  | 0,472021  | 0,481242  | 0,447806  | 0,479672  | 0,466637  | -0,440260 | -1,291162 | -1,516236 |
| ID83942         |                       |                   | 0,990476  | 1,500950  | 1,179582  | 0,697699  | 0,328366  | 1,130716  | -0,694862 | -0,366539 | -0,017199 | -1,476496 | -1,289594 | -1,352225 |
| ID1717          |                       |                   | 0,448004  | 1,058169  | 0,731411  | 0,836310  | 0,461475  | -0,015994 | -0,304318 | 0,597679  | 0,103609  | -1,969962 | -1,288583 | -1,150291 |
| ID791           | CPNE1                 | EF1D              | 0,135793  | 0,366669  | 0,282795  | 1,104294  | 0,839845  | 1,159380  | 0,170657  | 0,355926  | 0,036094  | -2,252913 | -1,286003 | -1,475764 |
| ID1277          |                       |                   | 0,915158  | 1,659125  | 0,933593  | 0,438775  | 0,221938  | 0,477341  | 0,073692  | -1,087137 | -0,847201 | -0,172648 | -1,278133 | -1,377664 |
| ID1432          | NNMT                  |                   | 0,983396  | 1,026689  | 1,338016  | 0,728121  | 0,917160  | 0,413151  | -1,021699 | -0,533896 | -0,318732 | -1,050031 | -1,272858 | -1,471825 |

Table S-4: cluster 9

| ID <sup>1</sup> | Protein <sup>12</sup> |              | co_0 min  | co_30 min | co_60 min | co_24 h   | co_48 h   | co_72 h   | PI_0 min  | PI_30 min | PI_60 min | PI_24 h   | PI_48 h   | PI_72 h   |
|-----------------|-----------------------|--------------|-----------|-----------|-----------|-----------|-----------|-----------|-----------|-----------|-----------|-----------|-----------|-----------|
| ID990           | IF4A1                 | HNRPF, ACTG  | 0,722227  | 1,225113  | 1,249401  | 0,901437  | 0,720870  | 0,254010  | 0,027360  | -0,933506 | -0,596831 | -0,784233 | -1,253737 | -1,728170 |
| ID516           |                       |              | 0,298704  | 0,585066  | -0,311377 | 0,0906483 | 0,522988  | 1,667125  | -0,488245 | -0,009743 | 0,050926  | -1,238284 | -1,082801 |           |
| ID1383          |                       |              | 0,784441  | 1,403496  | 1,173225  | 1,161162  | 0,297692  | 0,128789  | -0,888752 | -0,672309 | 0,087284  | -1,163108 | -1,225159 | -1,377536 |
| ID1533          |                       |              | 0,827484  | 0,972094  | 1,268743  | 0,218134  | 0,710040  | 0,479521  | -0,896268 | -0,852181 | 0,187798  | -1,046609 | -1,217943 | -0,912465 |
| ID2290995       |                       |              | 0,522878  | 0,538463  | 0,368101  | 0,619171  | 0,390537  | 0,656429  | 0,120967  | 0,099659  | 0,065720  | -0,016873 | -1,208773 | -2,160497 |
| ID1286          |                       |              | -0,110960 | 0,532119  | 0,369239  | 1,095144  | 0,659068  | 0,996136  | 1,158700  | -0,457715 | -1,104074 | -0,007283 | -1,208650 | -1,923545 |
| ID218682        |                       |              | 1,038052  | 1,185134  | 1,262611  | 0,437297  | 0,231632  | 0,490707  | -0,494730 | -0,963984 | 0,316662  | -1,338406 | -1,205592 | -1,293985 |
| ID436           | DDB1                  | OXP          | 0,325466  | 0,239047  | 0,791924  | 1,426127  | 1,354908  | 0,697229  | -0,065010 | -0,367078 | -0,577516 | -1,486253 | -1,202722 | -1,507686 |
| ID62715         |                       |              | -0,103120 | 0,662704  | -0,411101 | 0,445848  | 0,527279  | 1,621932  | 0,582355  | 0,307142  | 0,181390  | -2,292954 | -1,201331 | -0,893383 |
| ID1617          |                       |              | 0,757593  | 0,939155  | 1,038620  | 0,148886  | 0,238291  | 0,184192  | -0,317906 | 0,262834  | 0,449361  | -2,021547 | -1,200417 | -0,984448 |
| ID932           | RBBP4                 |              | -0,244932 | 0,410281  | -0,185123 | 1,302256  | 1,018093  | 0,949854  | 0,721727  | 0,165127  | 0,158405  | -1,828748 | -1,194641 | -1,729486 |
| ID1569          | APT                   |              | 0,986210  | 1,434757  | 1,542104  | 0,789044  | 0,162945  | -0,001793 | -1,146245 | -0,586393 | -0,352411 | -0,725155 | -1,165951 | -1,118401 |
| ID16882         |                       |              | -0,635608 | 0,164642  | 0,025102  | 0,614326  | 0,591339  | 1,783025  | -0,314696 | -0,106433 | 1,227172  | -0,578160 | -1,164241 | -1,751116 |
| ID1205          | NAGK                  |              | -0,104182 | 0,659793  | 0,171036  | 0,827735  | -0,027635 | 0,692969  | -0,344062 | -0,954170 | -0,57516  | -1,495484 | -1,160629 | -0,801822 |
| ID1628          | SKP1                  |              | 0,013364  | 0,876158  | 0,806324  | 0,448849  | 0,886685  | 1,118112  | -0,549045 | -0,684269 | 0,130326  | 0,060195  | -1,145707 | -1,945942 |
| ID3763676       |                       |              | 0,028741  | 0,456070  | -0,095680 | 1,089680  | 0,600458  | 0,169662  | 0,254154  | 0,528838  | 0,850162  | -0,743348 | -1,145244 | -2,179328 |
| ID1201          |                       |              | -0,418857 | 0,698341  | 0,299122  | 1,666613  | -0,055977 | -0,219632 | 1,124736  | -0,314969 | -1,350784 | -0,300827 | -1,137780 | -0,565193 |
| ID1278          | EF1D                  |              | 0,685437  | 1,475483  | 0,651813  | 0,814635  | 0,484690  | -0,331415 | 0,027838  | -1,643800 | -0,269304 | 0,989340  | -1,134877 | -1,502505 |
| ID577           | IMMT                  | PLOD3, HS90B | 0,374205  | 1,168922  | 0,943155  | 0,520386  | 0,846137  | 0,738637  | 0,035196  | -0,907544 | 0,190111  | -2,086568 | -1,118208 | -1,226072 |
| ID504850        |                       |              | 0,582918  | 1,118519  | 0,821622  | 0,502231  | 1,097991  | 0,653662  | -1,051918 | -0,450580 | -0,634133 | -0,225648 | -1,105674 | -1,403401 |
| ID1434          |                       |              | -0,596345 | 0,190391  | -0,027333 | -0,233597 | 0,521596  | 2,448240  | -0,690201 | 0,816085  | 0,164367  | -1,041014 | -1,105205 | -0,707237 |
| ID1115          | THOC3                 |              | 0,565644  | 1,426208  | 0,799617  | 0,641368  | 0,081739  | 1,197143  | -0,639008 | -0,279715 | -0,177047 | -2,048025 | -1,102867 | -0,977064 |
| ID1565          | SFRS3                 |              | 0,304614  | 0,538818  | 0,557653  | 0,687955  | 1,385823  | 0,833143  | 0,439102  | -0,188363 | -0,694976 | -1,451825 | -1,102696 | -1,672205 |
| ID1189          |                       |              | -0,221219 | 0,918269  | 0,093021  | 1,740484  | 0,399402  | -0,854460 | 1,132675  | 0,027048  | -1,581053 | -0,249904 | -1,093432 | -0,373305 |
| ID1576          | TCTP                  |              | 0,367330  | 1,013096  | 0,590196  | 1,448955  | 0,937849  | 0,600620  | -0,059493 | -0,735229 | -0,470267 | -1,502532 | -1,093243 | -1,472916 |
| ID1435          | ECHM                  |              | 0,112954  | 0,544296  | 0,361106  | 0,824944  | 1,028705  | 1,122480  | -0,307343 | 0,020474  | 0,519456  | -2,298023 | -1,070340 | -1,433214 |
| ID3058865       | PSB6                  |              | 0,797445  | 1,135269  | 0,839379  | -0,030867 | 0,246659  | 0,889819  | 0,462419  | -0,076403 | -0,111896 | -2,045283 | -1,067545 | -1,550317 |
| ID347052        |                       |              | 0,115150  | 0,404319  | 0,684568  | 0,194313  | 0,311578  | 2,007740  | -1,940156 | 0,115611  | 0,169664  | -0,037433 | -1,061352 | -0,973361 |
| ID163898        | CBX1                  |              | -0,299275 | 0,330837  | -0,396816 | 1,744608  | 0,938052  | 1,065988  | 1,054388  | -0,992144 | -0,722957 | -0,304773 | -1,035592 | -1,458509 |
| ID3275754       |                       |              | 0,221515  | 0,426128  | 0,404637  | 0,463537  | 0,308786  | 0,756654  | 0,823187  | 0,589692  | 0,310218  | -2,147798 | -1,012586 | -1,680858 |
| ID1318          | CLIC4                 | PPIE         | -0,888078 | 0,360356  | -0,626176 | 1,365408  | 0,869439  | 1,104330  | 0,569203  | 0,005988  | 0,318323  | -1,334095 | -1,003472 | -1,074744 |
| ID1746          | PFD5                  |              | 0,631061  | 0,835949  | 0,807494  | 1,189296  | 0,790154  | 0,409774  | -0,720842 | -0,779488 | -0,687151 | -0,269659 | -0,997355 | -1,276647 |
| ID1379          |                       |              | 0,467678  | 0,614640  | 0,728846  | 0,870007  | 1,240174  | 1,203522  | -0,600888 | -0,440764 | -0,207448 | -1,573429 | -0,994659 | -1,701036 |
| ID564           | P3H2                  | KU86, HS90A  | 0,091835  | 1,143014  | 0,379518  | 1,079489  | 0,800649  | 0,748208  | -0,154683 | -1,107227 | 0,464369  | -0,593559 | -0,983846 | -1,016157 |
| ID1331          | PP1A                  | DHC3         | 0,737412  | 1,319128  | 1,413684  | 0,051639  | 0,313029  | 0,400976  | -1,188796 | 0,482333  | -0,248744 | -1,806391 | -0,978791 | -0,947077 |
| ID607           | THOP1                 |              | 0,088406  | 0,388576  | 0,618796  | 0,396655  | 1,098866  | 1,466493  | 0,421328  | -1,322509 | 0,386711  | -1,525771 | -0,978177 | -1,420817 |
| ID75950         |                       |              | 0,208817  | 0,376611  | 0,157652  | 1,114270  | 0,593113  | 1,137179  | -0,584288 | -0,299050 | 0,168259  | -1,354779 | -0,961179 | -0,895298 |
| ID2214          |                       |              | -0,713926 | -0,607805 | -0,459380 | 1,947623  | 0,285170  | 1,018889  | -0,281739 | 0,455383  | 0,532292  | -0,471923 | -0,948668 | -0,873895 |
| ID943           | GSHB                  | K2C8, DDX39  | 0,829103  | 1,113689  | 1,430881  | 0,505105  | 0,651620  | 0,496188  | 0,210453  | -0,925921 | -0,799851 | -1,780082 | -0,943958 | -1,232248 |
| ID156308        |                       |              | 0,108996  | 0,276763  | 0,647812  | 2,005320  | 0,936946  | 0,277047  | -0,323226 | -0,432924 | 0,055232  | -1,981947 | -0,943543 | -1,121963 |
| ID319168        | OXP                   |              | 0,566579  | 1,200630  | 0,642806  | 1,268103  | 0,489378  | 0,070593  | -0,672604 | -0,893659 | -0,247379 | 0,612610  | -0,943231 | -1,940673 |
| ID2115505       |                       |              | 0,214269  | 0,160426  | 0,702190  | 0,117438  | -0,140075 | 2,268698  | 0,138404  | -0,141886 | 0,011513  | -1,704473 | -0,925327 | -1,127295 |
| ID586           |                       |              | 0,591024  | 0,687241  | 0,768981  | 0,078119  | -1,557171 | 1,671751  | -0,462963 | -0,140923 | 0,137120  | -0,022780 | -0,893310 | -0,862785 |
| ID1100          |                       |              | 0,329355  | 0,397339  | 0,476458  | 0,769246  | 0,559108  | 0,622537  | 1,241061  | -0,389572 | -0,835502 | -2,066660 | -0,866144 | -0,753891 |
| ID320752        |                       |              | -0,020733 | 0,063873  | 0,173332  | 1,445284  | 0,966598  | 0,534400  | 0,983176  | -0,328052 | -0,645662 | -1,676870 | -0,858111 | -1,056453 |
| ID1470          |                       |              | 0,285600  | 0,029802  | 0,639564  | 0,490664  | 0,558469  | 0,227828  | 0,254761  | 0,579605  | 0,609243  | -0,913236 | -0,833614 | -2,156995 |
| ID543746        |                       |              | 0,164444  | 0,090732  | 0,510754  | 1,212462  | 0,993346  | 0,592792  | 1,165949  | -0,552305 | -0,898455 | -1,672482 | -0,824790 | -1,200568 |
| ID1593          |                       |              | 1,060567  | 1,718480  | 0,847065  | -0,401312 | -0,133705 | 1,053549  | -0,134122 | -0,862378 | 0,048855  | -1,101501 | -0,799371 | -1,571502 |
| ID1580          |                       |              | 0,435058  | 1,393208  | 1,142566  | 0,577199  | 0,318366  | -0,598879 | -0,532335 | -0,668645 | 0,465286  | -0,237283 | -0,780783 | -1,573079 |
| ID30544         |                       |              | 0,022740  | -0,835441 | 0,715173  | 0,865988  | -0,224293 | 1,707015  | 0,431554  | -0,320639 | 0,644536  | -1,488772 | -0,734927 | -1,155127 |
| ID1604          | RBM8A                 |              | 0,835600  | 1,072341  | 0,741295  | 0,647843  | 0,465958  | 0,413252  | 0,305503  | -0,305106 | -0,263363 | -1,203886 | -0,722818 | -2,287589 |
| ID1219          |                       |              | 0,821260  | 0,973001  | 1,083799  | 1,468664  | 0,572071  | -0,944486 | -0,952913 | -0,161098 | -0,507445 | 0,017098  | -0,680962 | -1,684716 |
| ID109442        |                       |              | 0,551996  | 1,171522  | 0,499095  | 1,533532  | -0,223247 | -0,267053 | -0,178787 | -1,384734 | -0,155796 | 0,472249  | -0,653073 | -1,247642 |
| ID1420          | HSPB1                 |              | -0,046062 | 1,069898  | 0,964007  | 0,596484  | -0,142203 | 0,534524  | -0,714877 | 0,226657  | 1,043778  | -2,203517 | -0,602628 | -1,276942 |
| ID1451          |                       |              | -0,016425 | 0,063066  | 0,236653  | 0,677229  | 0,636979  | 0,739215  | -0,007295 | 0,575532  | 0,388133  | -1,036735 | -0,235066 | -2,280468 |
| ID1648          |                       |              | 0,014123  | 0,205347  | 0,814770  | 0,609452  | 0,812918  | 0,641903  | -0,361359 | -0,140386 | -0,155674 | 0,015694  | 0,214248  | -2,167112 |
| ID3369954       | TADBP                 |              | 0,153528  | 0,164627  | 0,166272  | 0,190939  | 0,297248  | 0,210832  | 0,129403  | 0,129355  | 0,157714  | 0,105904  | #DIV/0!   | -5,912055 |

Table S-4: cluster 10

| Cluster 10      |                       | Z-score <sup>13</sup> |           |           |           |           |           |           |           |           |           |           |           |
|-----------------|-----------------------|-----------------------|-----------|-----------|-----------|-----------|-----------|-----------|-----------|-----------|-----------|-----------|-----------|
| ID <sup>1</sup> | Protein <sup>12</sup> | co_0 min              | co_30 min | co_60 min | co_24 h   | co_48 h   | co_72 h   | PI_0 min  | PI_30 min | PI_60 min | PI_24 h   | PI_48 h   | PI_72 h   |
| ID1702          | CALM                  | 0,157510              | 0,134613  | 0,828075  | -0,582884 | -0,577647 | -0,521979 | -0,425319 | 2,715986  | 0,534607  | -0,552765 | -0,971456 | -0,876932 |
| ID1236          |                       | 1,287332              | #DIV/0!   | 2,083228  | -0,454255 | -0,131170 | -0,558200 | 1,383504  | 2,685806  | #DIV/0!   | -0,355789 | -0,671831 | -0,298477 |
| ID1455          |                       | -0,056111             | 0,016933  | 1,091443  | -0,163013 | -0,411623 | -1,237110 | -0,478496 | 2,329246  | 0,847265  | -1,218861 | -0,597816 | -0,426571 |
| ID3403522       | HSPB1                 | -0,501480             | -0,449666 | -0,360383 | 0,904721  | -0,630644 | -0,667678 | 0,476129  | 2,051322  | 0,624310  | -0,406046 | -0,605729 | -0,536369 |
| ID1439          |                       | -0,839344             | -0,260922 | -0,042003 | -0,375647 | 0,000641  | 0,240868  | 0,017585  | 2,023112  | 0,372989  | 1,535803  | -1,108576 | -1,180554 |
| ID17374         |                       | -0,131525             | -1,189889 | -0,160990 | -0,589669 | -0,421263 | -0,391990 | 1,115207  | 1,990347  | 1,235387  | 0,349005  | -0,565333 | -1,152037 |
| ID1719          | PDIA3                 | -0,803240             | -0,558279 | -0,372213 | -0,149699 | -0,361309 | 0,224960  | 0,480551  | 1,987482  | 1,016044  | -0,582106 | -0,304139 | -0,723580 |
| ID1623          |                       | 1,103758              | 0,955359  | -0,188075 | -0,140478 | 0,265321  | -0,384722 | 0,939240  | 1,970704  | 0,440036  | -1,544431 | -0,659690 | -0,686364 |
| ID135817        |                       | -0,330522             | -0,487159 | -0,001990 | 0,375441  | -0,128048 | -1,118895 | 0,513415  | 1,968149  | 0,799182  | -0,379454 | -0,408303 | -0,896680 |
| ID1460          | PSB7                  | -0,321373             | 0,254481  | 0,513092  | -0,359390 | -0,344612 | 0,268417  | 0,434099  | 1,866997  | 1,202938  | -0,437831 | -1,425303 | -1,760973 |
| ID185509        |                       | -0,849319             | -0,394283 | -0,812409 | 0,189385  | 0,110257  | 0,539914  | 0,995117  | 1,864715  | 1,174663  | -0,583661 | -1,093468 | -1,286826 |
| ID2997219       |                       | 0,168616              | 0,168792  | 0,122328  | 0,400079  | -0,830108 | -0,700139 | 0,630094  | 1,834932  | 0,988950  | -0,596633 | -0,862125 | -1,473944 |
| ID2158110       | RD23B                 | -0,810138             | 0,096711  | -0,946290 | -0,423407 | -0,363088 | -0,533158 | 0,816843  | 1,815975  | 1,933672  | -0,411309 | -0,445949 | -0,832690 |
| ID94683         |                       | -0,780754             | -0,591743 | -0,473386 | -0,469345 | -0,196469 | 0,608091  | 0,850242  | 1,809573  | 0,959411  | 1,022461  | -0,830957 | -1,651510 |
| ID1739          |                       | -0,111792             | 0,175973  | -0,115037 | 0,338399  | -0,156004 | -0,092056 | 0,328864  | 1,788495  | 0,764063  | -1,799511 | -0,544678 | -1,026595 |
| ID3761682       | RCN2                  | 0,074064              | -0,923854 | -0,483250 | -0,752221 | -1,075355 | 0,320029  | 0,881458  | 1,728635  | 1,487507  | -0,426447 | -0,024662 | -0,912515 |
| ID1825144       |                       | 0,002110              | 0,055334  | 0,173631  | 0,049639  | 0,068357  | -0,739305 | 0,662931  | 1,659312  | 0,736350  | -0,718536 | -0,867446 | -1,712011 |
| ID732           |                       | -0,505650             | -0,794966 | -0,644169 | -0,253238 | -0,159054 | -0,013710 | 0,519134  | 1,630947  | 0,933816  | 0,421975  | 0,510643  | -1,540234 |
| ID469498        | PRS4                  | -0,218102             | -0,450420 | -0,162238 | -0,597034 | -0,690707 | -0,363816 | 1,261165  | 1,625976  | 1,636697  | -0,259927 | -1,135849 | -1,035202 |
| ID1600          |                       | 0,297361              | 0,482734  | 0,874434  | -0,244433 | -0,348696 | -0,905416 | 0,376053  | 1,616168  | 1,066310  | -1,161007 | -1,650019 | -1,182608 |
| ID217409        |                       | -0,190395             | 0,381494  | 0,219892  | -0,360722 | -0,041282 | 0,384302  | 0,891387  | 1,592361  | 1,090250  | -0,784352 | -1,728947 | -1,650076 |
| ID1188          | DDAH1                 | -0,251258             | -0,166544 | -0,090931 | 0,453060  | -0,465150 | -0,457839 | 1,585366  | 1,586118  | 0,860628  | -1,420237 | -1,534045 | -0,454229 |
| ID731           |                       | -0,281342             | -0,809714 | -0,572809 | -0,212602 | 0,175085  | -0,214430 | 0,686841  | 1,558166  | 0,733407  | 0,522631  | 0,397865  | -1,852440 |
| ID343050        |                       | 0,273198              | 0,980871  | 0,446363  | -0,559415 | -0,611522 | -0,801807 | 1,380355  | 1,535608  | 1,394132  | -0,945109 | -0,650162 | -0,658983 |
| ID1520          | ID706                 | -0,918371             | -0,471383 | -0,673027 | -0,515882 | -0,577184 | -0,122283 | 1,033488  | 1,511483  | 2,225812  | -0,245346 | -0,630189 | -0,678453 |
| ID706           |                       | 0,040060              | 0,060635  | 0,361502  | 0,338630  | -0,134500 | -1,870986 | 0,684932  | 1,505623  | 0,934934  | -0,393668 | -0,385737 | -1,239843 |
| ID1721          |                       | 0,792207              | 1,036431  | 0,375224  | -0,567175 | -0,776211 | -1,158314 | 0,567929  | 1,501014  | 0,448470  | -0,757366 | -0,463863 | -0,636724 |
| ID2209869       | ID1410                | -0,203041             | -0,119799 | -0,163852 | -0,218282 | -0,126322 | -1,178350 | 1,486998  | 1,494456  | 1,210223  | 0,140670  | -0,735767 | -1,551765 |
| ID1410          |                       | 0,478204              | 0,651591  | 1,049038  | -0,097683 | -0,121956 | -0,052124 | 0,365868  | 1,480805  | 0,515614  | -1,012210 | -1,635300 | -1,874901 |
| ID996           |                       | -1,435769             | 1,289590  | -0,804186 | 0,315181  | 1,046001  | -0,640167 | -0,081746 | 1,473314  | 0,571089  | -0,061137 | -0,464151 | -1,223305 |
| ID975           | VIME                  | -1,312529             | 1,022692  | -0,613990 | 0,253015  | 0,012957  | -2,009505 | 0,757739  | 1,439540  | 0,770331  | 0,526402  | -0,008849 | -0,706200 |
| ID1341          |                       | 0,415496              | 0,331453  | 0,369127  | -0,250555 | -0,362088 | 0,038719  | 1,183418  | 1,430534  | 0,800325  | -1,046844 | -1,587389 | -1,583908 |
| ID1034          |                       | -0,251704             | -0,096446 | 0,178076  | -0,392606 | -0,499070 | 0,120770  | 1,621890  | 1,427121  | 1,332625  | -0,999873 | -1,187522 | -1,503230 |
| ID3762817       | ACTG                  | 0,055508              | 0,038298  | 0,553286  | -0,503915 | -0,652067 | -0,719014 | 0,430408  | 1,392615  | 1,084505  | -0,312649 | 0,149344  | -1,594482 |
| ID1343          |                       | 0,143288              | 0,495900  | 0,669357  | 0,015167  | -0,144738 | -0,606528 | 0,339999  | 1,367700  | 0,772337  | 0,924557  | -1,817322 | -1,928578 |
| ID3765751       |                       | 0,645731              | 0,122321  | 0,717628  | -0,025642 | -0,523762 | -0,014913 | 0,918394  | 1,352686  | 0,213112  | -0,742042 | -1,798209 | -1,050813 |
| ID3170569       | PRDX4                 | -1,117523             | -0,849618 | -0,585246 | -1,045266 | -0,040401 | 0,805559  | 1,518232  | 1,339932  | 1,244483  | -0,431118 | -0,930968 | -0,015845 |
| ID1471          |                       | -0,523321             | 0,489099  | -0,120045 | 0,535541  | -0,477110 | -0,949690 | -0,185880 | 1,322370  | 1,156007  | 1,890735  | -1,147580 | -1,517442 |
| ID1609          |                       | 0,084788              | 0,318874  | 0,427135  | -0,789457 | -0,287102 | -0,569919 | 1,253805  | 1,309367  | 1,453905  | -0,292360 | -1,375027 | -1,607100 |
| ID1468          | PHB                   | -0,593959             | -0,433732 | -0,451607 | 0,617942  | 0,413374  | 0,873652  | 0,817668  | 1,291238  | 1,119093  | -0,555665 | -1,338510 | -1,898412 |
| ID1035          |                       | 0,539429              | 0,754342  | 0,833610  | 0,009434  | -0,431370 | -0,370919 | 1,057880  | 1,251298  | 0,533990  | -1,358846 | -1,536057 | -1,622503 |
| ID1477          |                       | -0,415022             | 0,304636  | -0,076204 | 0,465938  | -0,120679 | -0,141787 | 1,304542  | 1,244340  | 1,035775  | -0,938253 | -1,234212 | -1,663637 |
| ID327           | ID987                 | 0,037574              | -0,214188 | 0,019725  | 0,609199  | 0,088723  | -0,895421 | 0,836299  | 1,243185  | 0,572438  | -0,813946 | -0,060491 | -1,626583 |
| ID987           |                       | 0,400414              | 0,495411  | 0,777049  | 0,478799  | -0,374706 | -0,429899 | -1,161567 | 1,236964  | 1,124778  | -1,011724 | -0,695319 | -1,093132 |
| ID927           |                       | -0,475962             | 0,089898  | -0,268757 | -0,476994 | -0,722890 | -0,370121 | 1,246716  | 1,233793  | 1,832655  | 0,683077  | -1,128603 | -1,472043 |
| ID578           | K1C17                 | -0,604014             | -0,659341 | -0,375158 | -0,672411 | -0,212929 | -0,211972 | 1,361689  | 1,233681  | 1,900119  | -0,523555 | -0,512660 | -0,854337 |
| ID281947        |                       | 0,292510              | 0,601636  | 0,337968  | -0,587651 | -0,923398 | -0,757399 | 1,046095  | 1,233297  | 1,258964  | -0,103739 | -0,630727 | -0,888090 |
| ID2074209       |                       | -0,137824             | -0,364271 | 0,089750  | -0,233138 | -0,102454 | -0,734746 | 0,721040  | 1,196421  | 1,103732  | 0,110745  | 0,112457  | -1,734026 |
| ID1638          | SSRD                  | 0,093357              | 0,167527  | 0,269350  | 0,304223  | 0,223074  | -0,937635 | 0,331138  | 1,149448  | 1,922059  | -1,592053 | -1,424380 | -0,904121 |
| ID230824        |                       | -0,912280             | -0,702580 | 0,533004  | -0,860565 | 0,541610  | 0,516353  | 0,205129  | 1,128813  | 1,690719  | -0,400893 | -0,990260 | -0,849274 |
| ID2722863       |                       | -0,472185             | -1,214789 | -0,471351 | 0,598480  | -0,428096 | 0,566322  | 1,237645  | 1,072191  | 1,324372  | -1,417952 | -0,232033 | -0,917092 |
| ID986           | K1C18                 | 0,081056              | 0,226858  | 0,153469  | -0,072471 | 0,036247  | -0,234819 | 1,706640  | 1,067853  | 1,063904  | -1,590734 | -1,272994 | -1,562691 |
| ID3259231       |                       | -0,653458             | 0,002306  | 0,251427  | 0,700972  | -0,195330 | 0,130653  | 0,996740  | 1,062418  | 0,820086  | -2,333088 | -0,775866 | -0,590130 |
| ID2753          |                       | 0,845033              | 0,865028  | 0,963633  | -0,875525 | -0,856357 | -0,586757 | 1,024870  | 1,030821  | 0,622444  | -1,779611 | -1,028074 | -0,670406 |
| ID1530          | CBX5                  | 0,060731              | 0,171949  | 0,118529  | 0,329819  | 0,282466  | 0,552259  | 0,707122  | 1,025583  | 1,164186  | -1,891033 | -1,377992 | -1,616378 |
| ID12547         |                       | 0,303971              | -0,152900 | 0,967879  | 0,619315  | 0,182253  | -0,792720 | 1,446130  | 0,999456  | -0,070560 | -1,209002 | -0,999325 | -1,596747 |
| ID3557801       |                       | -0,490614             | 0,405221  | -0,343992 | 0,824876  | 1,060556  | -0,747677 | 0,572058  | 0,999249  | 0,704364  | -0,500364 | -0,836509 | -1,772259 |

Table S-4: cluster 10

| ID <sup>1</sup> | Protein <sup>12</sup> |                   | co_0 min  | co_30 min | co_60 min | co_24 h   | co_48 h   | co_72 h   | PI_0 min  | PI_30 min | PI_60 min | PI_24 h   | PI_48 h   | PI_72 h   |
|-----------------|-----------------------|-------------------|-----------|-----------|-----------|-----------|-----------|-----------|-----------|-----------|-----------|-----------|-----------|-----------|
| ID3668269       |                       |                   | 0,706499  | 0,800281  | 0,652664  | -0,632478 | -0,498297 | -0,146333 | 1,173449  | 0,981949  | 0,954024  | -1,344003 | -1,288072 | -1,695683 |
| ID2880272       |                       |                   | -1,036841 | -0,664549 | -0,988830 | -0,560556 | -0,053896 | 0,747383  | 1,534561  | 0,976970  | 1,312403  | 0,341002  | -0,429403 | -1,092994 |
| ID1532          |                       |                   | 0,325214  | 0,061471  | 0,683157  | -0,206406 | -0,295513 | 0,814498  | 0,399189  | 0,975676  | 0,591704  | -2,276522 | -0,982324 | -0,659274 |
| ID712           | LMNB1                 |                   | -0,479115 | 0,282523  | -0,400867 | -0,192916 | 0,280936  | 1,506102  | 1,112496  | 0,967887  | 0,677919  | -1,863307 | -0,744386 | -1,613098 |
| ID831           | CALR                  |                   | 0,086930  | 0,663377  | 0,291461  | -1,309118 | -0,816110 | -0,012308 | 0,951498  | 0,961302  | 1,393437  | 0,350379  | -0,834171 | -1,639081 |
| ID399832        | PAK2                  | PDIA3             | -0,173925 | -0,038464 | 0,246458  | -0,227103 | -0,541182 | -0,104586 | 0,488882  | 0,932503  | 2,053092  | -0,153376 | -0,601820 | -1,918823 |
| ID3497145       |                       |                   | 0,461893  | 0,526643  | 0,629586  | 0,021290  | 0,166807  | 0,025417  | 0,767047  | 0,911445  | 0,878776  | -0,958009 | -1,187063 | -2,483334 |
| ID977           | TXND5                 | HNRPF, TBAK       | -0,210851 | 0,410556  | 0,011337  | -0,083715 | -0,230310 | 0,137574  | 1,204845  | 0,902372  | 1,168211  | 0,598222  | -1,814227 | -1,944459 |
| ID10303         |                       |                   | 1,059583  | 0,771689  | 0,855203  | -0,309569 | -0,453540 | -0,717769 | 0,198997  | 0,888043  | 0,312228  | -0,729569 | -0,929206 | -1,128481 |
| ID2091139       |                       |                   | 0,259856  | 0,367000  | 0,152359  | 0,126043  | -0,113038 | -2,058319 | 0,607370  | 0,824484  | 1,182506  | -0,373298 | -0,180946 | -0,887341 |
| ID865           | PDIA3                 | TBA1B             | 0,521315  | 0,817726  | 0,626803  | -0,237747 | -0,173002 | 0,223940  | 0,666505  | 0,814613  | 0,861039  | -0,383361 | -1,990412 | -1,843259 |
| ID1096          |                       |                   | 0,751317  | 0,414983  | 1,225448  | -0,072669 | -0,603373 | -0,195367 | 0,633656  | 0,800985  | 0,900089  | -1,377086 | -1,182135 | -1,640119 |
| ID992           | TXND5                 | ACL6A             | 0,688591  | 0,733958  | 0,838559  | 0,140107  | 0,002850  | -0,726757 | 0,896924  | 0,799758  | 0,915035  | -1,187526 | -1,646185 | -1,752196 |
| ID1046          | ARP3                  | TADBP             | -1,128150 | -0,103282 | -0,386337 | 0,354964  | 0,513328  | 1,588774  | 1,214154  | 0,793572  | 0,479798  | -0,788560 | -1,389921 | -1,345482 |
| ID3763073       |                       |                   | -0,307942 | -0,434587 | -0,735759 | -0,023152 | 0,610436  | 0,390901  | 0,786651  | 0,783581  | 0,651649  | -0,937843 | 0,127334  | -1,145728 |
| ID708           | LMNB1                 |                   | -0,737554 | -0,015215 | -0,937724 | -0,374227 | 0,543716  | 1,283374  | 1,424599  | 0,778317  | 1,076935  | -0,964819 | -0,721278 | -1,597330 |
| ID1334          | ANXA5                 |                   | 0,294356  | 0,400788  | 1,050840  | -0,942836 | -0,652523 | -0,168895 | 1,148410  | 0,755010  | 1,378277  | -0,366134 | -1,416468 | -1,572357 |
| ID1524          | NDUV2                 |                   | 0,069704  | 0,838279  | 0,418526  | -0,355541 | 0,117333  | 0,125545  | 0,522903  | 0,754999  | 1,277657  | -0,536071 | -1,422201 | -1,945152 |
| ID268600        |                       |                   | -1,011274 | -0,551655 | -0,820201 | -0,333340 | -0,778166 | 0,761796  | 1,145377  | 0,754412  | 1,629075  | 0,582991  | -0,611319 | -0,621947 |
| ID198671        | ERO1A                 |                   | 0,568565  | 0,871376  | 1,232953  | -0,585815 | -0,335889 | -0,244540 | 0,512161  | 0,747597  | 0,819206  | -0,157738 | -1,621587 | -1,845724 |
| ID2150207       |                       |                   | -0,699980 | -0,677476 | -0,792493 | 0,367827  | -1,183086 | 1,048113  | 0,852492  | 0,734231  | 1,189392  | -0,192900 | 0,039362  | -0,733706 |
| ID733           |                       |                   | -0,140594 | 0,201393  | -1,035011 | 0,851607  | -0,465825 | 0,520072  | 0,685972  | 0,706751  | 0,799967  | -1,518572 | -0,238463 | -0,746939 |
| ID1013          | UQCR1                 |                   | -0,080704 | 0,379075  | 0,396924  | 0,576865  | 0,269940  | -0,239930 | 1,023026  | 0,650953  | 1,338859  | -1,983653 | -1,765739 | -1,061530 |
| ID1537          |                       |                   | 0,692963  | 0,641482  | 0,159562  | -0,131591 | -0,196642 | 0,307261  | 0,796205  | 0,639299  | 0,692234  | -1,764804 | -0,595022 | -1,642256 |
| ID1484          |                       |                   | -1,162699 | -0,038839 | -0,302237 | 1,265053  | 0,431830  | 0,203627  | 0,932840  | 0,627242  | 0,730555  | 0,426245  | -1,035908 | -1,971147 |
| ID451640        | PDIA3                 |                   | 0,419326  | -1,389954 | 0,219401  | -0,777408 | -0,614237 | 0,355686  | 1,505771  | 0,615331  | 0,607421  | 0,943100  | -0,625896 | -1,022766 |
| ID2152149       |                       |                   | -0,881169 | -0,106615 | -0,842636 | 0,318123  | 0,116427  | 0,303747  | 0,855123  | 0,596437  | 1,364973  | -0,408019 | -0,242529 | -1,175866 |
| ID1983973       |                       |                   | 0,104991  | 0,588575  | 0,294443  | -0,608067 | -0,125938 | 0,522040  | 0,490448  | 0,570414  | 0,939244  | -0,737543 | -0,778141 | -1,444852 |
| ID692           | FKBP9                 |                   | -0,540464 | -0,249069 | -0,724166 | 0,231583  | -0,410871 | 1,513742  | 0,749377  | 0,505934  | 0,937428  | 0,051925  | -0,741370 | -1,311070 |
| ID1059          |                       |                   | -0,308212 | 0,045138  | -0,019104 | -0,114349 | 0,848376  | 1,025457  | 0,287460  | 0,483424  | 0,899750  | 0,331570  | -1,475722 | -1,920896 |
| ID1289          |                       |                   | -0,115221 | 0,598629  | 0,456638  | 0,537440  | -0,185078 | 0,248783  | 1,113596  | 0,439352  | 0,097804  | 0,656756  | -1,602807 | -2,081703 |
| ID11611         |                       |                   | -0,506549 | 0,025162  | -0,996692 | -0,397709 | 0,634788  | 1,633315  | 0,983111  | 0,437852  | 1,227031  | -0,971220 | -0,829094 | -1,482800 |
| ID2089255       |                       |                   | 0,386295  | 0,696663  | 0,375032  | 0,448909  | 0,469865  | -1,626973 | 0,551001  | 0,435387  | 0,863386  | -0,542837 | -0,765251 | -1,427186 |
| ID884           | K2C8                  | UAP56, IF2B, GSHB | 0,363690  | 0,446195  | 0,167198  | 0,069237  | 0,509083  | -0,033124 | 1,776435  | 0,412810  | 0,478026  | -1,964778 | -1,086535 | -1,629432 |
| ID1985723       |                       |                   | -0,396047 | -0,130840 | 0,343119  | 0,870371  | 0,244978  | 0,330772  | 0,949247  | 0,372038  | 0,637428  | -1,718912 | -1,037312 | -0,894570 |
| ID324496        |                       |                   | 0,056714  | -0,421131 | 0,319501  | 0,601732  | 0,932837  | 0,001011  | 1,438393  | 0,299389  | 0,402035  | -1,616072 | -1,038723 | -1,379704 |
| ID1570          |                       |                   | 0,651226  | 0,056402  | 0,239706  | 0,259987  | -0,692456 | -0,455066 | 0,915368  | 0,296842  | 0,599808  | -1,347551 | 0,429664  | -1,290816 |
| ID13892         | ACL6A                 | IF4A1, HNRPF      | -0,352054 | 0,025964  | -0,280611 | 0,898001  | 0,720094  | 0,501374  | 1,382754  | 0,235367  | 0,939961  | -1,577699 | -1,151340 | -1,736236 |
| ID1560          | ATP5H                 | CBX5              | -0,716806 | 0,136294  | -0,410641 | -0,475421 | -0,542017 | -0,421009 | 1,567107  | 0,161192  | 1,844288  | 1,414903  | -0,991851 | -1,212314 |
| ID537545        | LMNB1                 | TKT               | -0,876789 | -0,275346 | -1,523173 | 0,048582  | 0,550050  | 1,640678  | 1,228052  | 0,053259  | 1,137451  | -0,487577 | -0,477052 | -1,140030 |
| ID366771        | GRP78                 |                   | -0,362374 | -0,046841 | -0,859911 | -0,151318 | 0,318794  | 1,942003  | 1,283304  | 0,022978  | 0,896262  | -1,264311 | -0,827054 | -1,267609 |
| ID1601          |                       |                   | 0,149155  | 0,255659  | 0,119875  | 0,459666  | 0,507155  | 0,392231  | #DIV/0!   | -0,066389 | 1,614028  | -0,210813 | -1,159845 | -1,433451 |
| ID2666660       | SPRC                  |                   | 0,320017  | 0,849330  | 0,297831  | -1,464509 | -0,567122 | 1,457197  | 0,412302  | -0,067052 | 1,267135  | -0,032689 | -1,496218 | -0,984394 |
| ID141431        |                       |                   | -0,403803 | -0,675833 | -0,318596 | 0,404100  | 0,384913  | 0,362108  | -0,014010 | -0,548777 | 2,321688  | -0,336386 | -0,511507 | -0,391420 |

**Table S-5: Summary results from network-analysis using Ingenuity Pathway Analysis (IPA) for each single cluster.**

Spot-lists of MALDI-TOF-MS identified proteins from statistical-analyses of each cluster were analysed.

Resulting networks, molecular and cellular functions, as well as “Top Tox Lists” and the respective scores are displayed.

The same categories of “Top Tox Lists” or “molecular and cellular functions” were coloured equally.

Table S-5

|                  | <b>rank</b> | <b>Associated Network Functions</b>                                                                    | <b>score</b> |
|------------------|-------------|--------------------------------------------------------------------------------------------------------|--------------|
| <b>cluster 1</b> | 1           | Post-translational modification, cancer, cell morphology                                               | 50           |
|                  | 2           | Post-translational modification, protein folding, inflammatory disease                                 | 36           |
|                  | 3           | Cell death, gene expression, DNA replication, recombination and repair                                 | 25           |
|                  | 4           | Genetic disorder, metabolic disease, cellular development                                              | 21           |
|                  | 5           | Endocrine system development and function, small molecule biochemistry, lipid metabolism               | 2            |
| <b>cluster 2</b> | 1           | Post-translational modification, protein folding, cell function and maintenance                        | 56           |
|                  | 2           | Cancer, cellular development, tumor morphology                                                         | 18           |
|                  | 3           | Cell cycle, cancer, cardiovascular disease                                                             | 18           |
|                  | 4           | Cell cycle, hair and skin development and function, embryonic development                              | 1            |
|                  | 5           | n.d.                                                                                                   | n.d.         |
| <b>cluster 3</b> | 1           | Post-translational modification, protein folding, cancer                                               | 61           |
|                  | 2           | Cellular compromise, inflammatory response, lipid metabolism                                           | 27           |
|                  | 3           | Dermatological disease and conditions, genetic disorder, cell-to-cell signalling and interaction       | 24           |
|                  | 4           | Development disorder, amino acid metabolism, small molecule biochemistry                               | 2            |
|                  | 5           | n.d.                                                                                                   | n.d.         |
| <b>cluster 4</b> | 1           | Cellular assembly and organization, post-translational modification, protein folding                   | 58           |
|                  | 2           | Cellular function and maintenance, cellular development, hematological system development and function | 27           |
|                  | 3           | Cancer, cellular development, cellular growth and proliferation                                        | 26           |
|                  | 4           | Cell morphology, cellular compromise, connective tissue development                                    | 22           |
|                  | 5           | Cellular assembly and organization, protein synthesis, DNA replication, recombination and repair       | 11           |
| <b>cluster 5</b> | 1           | Cancer, reproductive disease, cardiovascular disease                                                   | 63           |
|                  | 2           | Cellular assembly and organization, genetic disorder, neurological disease                             | 39           |
|                  | 3           | Post-translational modification, protein folding, cell morphology                                      | 31           |
|                  | 4           | Drug metabolism, endocrine system development and function, lipid metabolism                           | 22           |
|                  | 5           | Cellular assembly and organization, cellular movement, cellular development                            | 13           |

Table S-5

|                   | <b>rank</b> | <b>Associated Network Functions</b>                                                                                 | <b>score</b> |
|-------------------|-------------|---------------------------------------------------------------------------------------------------------------------|--------------|
| <b>cluster 6</b>  | 1           | Protein degradation, cell-to-cell signalling and interaction, hematological system development and function         | 37           |
|                   | 2           | Molecular transport, small molecule biochemistry, infectious disease                                                | 11           |
|                   | 3           | Reproductive system disease, genetic disorder, skeletal and muscular disorders                                      | 2            |
|                   | 4           | n.d.                                                                                                                | n.d.         |
|                   | 5           | n.d.                                                                                                                | n.d.         |
| <b>cluster 7</b>  | 1           | Post-translational modification, protein folding, cellular compromise                                               | 58           |
|                   | 2           | Cellular assembly and organization, genetic disorder, skeletal and muscular disorder                                | 47           |
|                   | 3           | Cancer, reproductive system disease, cardiovascular disease                                                         | 46           |
|                   | 4           | Cardiovascular system development and function, genetic disorder, metabolic disease                                 | 45           |
|                   | 5           | Molecular transport, nucleic acid metabolism, small molecule biochemistry                                           | 42           |
| <b>cluster 8</b>  | 1           | Genetic disorder, skeletal and muscular disorders, Cellular assembly and organization                               | 55           |
|                   | 2           | Cell death, RNA post-translational modification                                                                     | 54           |
|                   | 3           | Cellular function and maintainance, neurological disease, cell death                                                | 42           |
|                   | 4           | Cellular assembly and organization, cell death, cellular function and maintainance                                  | 24           |
|                   | 5           | Cell morphology, cellular compromise, drug metabolism                                                               | 21           |
| <b>cluster 9</b>  | 1           | Cancer, reproductive system disease, cardiovascular disease                                                         | 55           |
|                   | 2           | Cell death, genetic disorder, neurological disease                                                                  | 50           |
|                   | 3           | Lipid metabolism, post-translational modification, small molecule biochemistry                                      | 37           |
|                   | 4           | Cellular development, drug metabolism, lipid metabolism                                                             | 25           |
|                   | 5           | Cellular development, cellular growth and proliferation, cell death                                                 | 20           |
| <b>cluster 10</b> | 1           | Cellular assembly and organization, hair and skin development and function, hepatic system development and function | 68           |
|                   | 2           | Cell morphology, cellular movement, organ development                                                               | 32           |
|                   | 3           | Neurological disease, organismal injury and abnormalities, small molecule biochemistry                              | 26           |
|                   | 4           | Cellular assembly and organization, molecular transport, RNA trafficking                                            | 2            |
|                   | 5           | n.d.                                                                                                                | n.d.         |

Table S-5

|                  | rank | Top Tox lists                                                                                                                                                   | p-value / ratio          |
|------------------|------|-----------------------------------------------------------------------------------------------------------------------------------------------------------------|--------------------------|
| <b>cluster 1</b> | 1    |  Mechanism of gene regulation by peroxisome proliferators via PPAR alpha       | 4.31E-04 / 4/95 (0.042)  |
|                  | 2    | 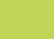 PPAR alpha/RXR alpha activation                                               | 3.32E-03 / 4/165 (0.024) |
|                  | 3    | 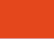 Nrf2 mediated oxidative stress response                                       | 7.14E-03 / 4/205 (0.02)  |
|                  | 4    | 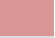 Liver necrosis / cell death                                                   | 1.84E-02 / 3/150 (0.02)  |
|                  | 5    | 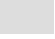 Decrease permeability transition of mitochondria and mitochondrial membrane   | 1.85E-02 / 1/5 (0.2)     |
| <b>cluster 2</b> | 1    | 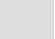 Decrease permeability transition of mitochondria and mitochondrial membrane   | 1.36E-02 / 1/5 (0.2)     |
|                  | 2    | 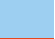 Hypoxia inducible factor signalling                                           | 1.56E-02 / 2/70 (0.029)  |
|                  | 3    | 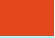 Nrf2 mediated oxidative stress response                                       | 1.83E-02 / 3/205 (0.015) |
|                  | 4    | 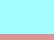 Increase Bradycardia                                                          | 2.17E-02 / 1/8 (0.125)   |
|                  | 5    | 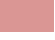 Liver necrosis / cell death                                                   | 6.32E-02 / 2/150 (0.013) |
| <b>cluster 3</b> | 1    | 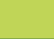 PPAR alpha/RXR alpha activation                                               | 1.88E-03 / 4/165 (0.024) |
|                  | 2    | 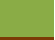 Mechanism of gene regulation by peroxisome proliferators via PPAR alpha       | 3.46E-03 / 3/95 (0.032)  |
|                  | 3    | 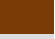 cell cycle: G2/M DNA damage checkpoint regulation                             | 5.57E-03 / 2/35 (0.057)  |
|                  | 4    | 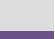 Decrease permeability transition of mitochondria and mitochondrial membrane   | 1.59E-02 / 1/5 (0.2)     |
|                  | 5    | 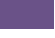 PXR/RXR activation                                                            | 2.00E-02 / 2/68 (0.029)  |
| <b>cluster 4</b> | 1    |  Nrf2 mediated oxidative stress response                                       | 6.33E-07 / 9/205 (0.044) |
|                  | 2    | 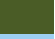 Aryl hydrocarbon receptor signalling                                         | 9.17E-05 / 6/151 (0.04)  |
|                  | 3    | 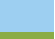 Hypoxia inducible factor signalling                                         | 4.79E-03 / 3/70 (0.043)  |
|                  | 4    | 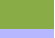 Mechanism of gene regulation by peroxisome proliferators via PPAR alpha     | 1.11E-02 / 3/95 (0.032)  |
|                  | 5    | 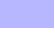 Fatty acid metabolism                                                       | 2.49E-02 / 3/129 (0.023) |
| <b>cluster 5</b> | 1    | 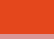 Nrf2 mediated oxidative stress response                                     | 2.66E-05 / 6/205 (0.039) |
|                  | 2    | 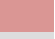 Liver necrosis / cell death                                                 | 1.17E-02 / 4/150 (0.027) |
|                  | 3    | 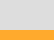 Decrease permeability transition of mitochondria and mitochondrial membrane | 2.90E-02 / 1/5 (0.2)     |
|                  | 4    | 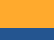 Increase transmembrane potential of mitochondria and mitochondrial membrane | 3.47E-02 / 2/50 (0.04)   |
|                  | 5    | 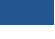 Oxidative stress                                                            | 4.41E-02 / 2/57 (0.035)  |

Table S-5

|                   | rank | Top Tox lists                                                                                                                                                   | p-value / ratio           |
|-------------------|------|-----------------------------------------------------------------------------------------------------------------------------------------------------------------|---------------------------|
| <b>cluster 6</b>  | 1    | 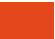 Nrf2 mediated oxidative stress response                                       | 2.07E-03 / 3/205 (0.015)  |
|                   | 2    |  Decrease permeability transition of mitochondria and mitochondrial membrane   | 6.31E-03 / 1/5 (0.2)      |
|                   | 3    |  Oxidative stress                                                              | 6.98E-02 / 1/57 (0.018)   |
|                   | 4    | 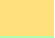 Mitochondrial dysfunction                                                     | 1.47E-01 / 1/125 (0.008)  |
|                   | 5    | 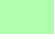 Cardiac hypertrophy                                                           | 2.70E-01 / 1/246 (0.004)  |
| <b>cluster 7</b>  | 1    | 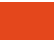 Nrf2 mediated oxidative stress response                                       | 1.55E-04 / 11/205 (0.054) |
|                   | 2    | 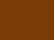 cell cycle: G2/M DNA damage checkpoint regulation                             | 1.41E-03 / 4/35 (0.114)   |
|                   | 3    | 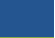 Oxidative stress                                                              | 8.39E-03 / 4/57 (0.07)    |
|                   | 4    | 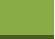 Mechanism of gene regulation by peroxisome proliferators via PPAR alpha       | 1.09E-02 / 5/95 (0.053)   |
|                   | 5    | 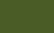 Aryl hydrocarbon receptor signalling                                          | 1.99E-02 / 6/151 (0.04)   |
| <b>cluster 8</b>  | 1    | 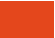 Nrf2 mediated oxidative stress response                                       | 4.95E-03 / 6/205 (0.029)  |
|                   | 2    | 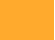 Increase transmembrane potential of mitochondria and mitochondrial membrane   | 6.61E-03 / 3/50 (0.06)    |
|                   | 3    | 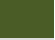 Aryl hydrocarbon receptor signalling                                          | 2.88E-02 / 4/151 (0.026)  |
|                   | 4    | 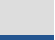 Decrease permeability transition of mitochondria and mitochondrial membrane   | 3.77E-02 / 1/5 (0.2)      |
|                   | 5    | 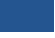 Oxidative stress                                                              | 7.07E-02 / 2/57 (0.035)   |
| <b>cluster 9</b>  | 1    | 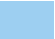 Hypoxia-inducible factor signalling                                           | 1.40E-03 / 4/70 (0.057)   |
|                   | 2    |  Nrf2 mediated oxidative stress response                                      | 3.02E-03 / 6/205 (0.029)  |
|                   | 3    | 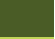 Aryl hydrocarbon receptor signalling                                        | 3.99E-03 / 5/151 (0.033)  |
|                   | 4    | 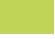 PPAR alpha/RXR alpha activation                                             | 1.07E-01 / 3/165 (0.018)  |
|                   | 5    | 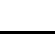 Glutathione depletion - phase II reactions                                  | 1.36E-01 / 1/21 (0.048)   |
| <b>cluster 10</b> | 1    | 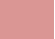 Liver necrosis / cell death                                                 | 1.67E-02 / 3/150 (0.02)   |
|                   | 2    | 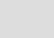 Decrease permeability transition of mitochondria and mitochondrial membrane | 1.79E-02 / 1/5 (0.2)      |
|                   | 3    | 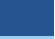 Oxidative stress                                                            | 1.79E-02 / 2/57 (0.035)   |
|                   | 4    | 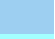 Hypoxia-inducible factor signalling                                         | 2.63E-02 / 2/70 (0.029)   |
|                   | 5    | 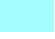 Increase Bradycardia                                                        | 2.84E-02 / 1/8 (0.125)    |

Table S-5

|           | rank | Molecular and cellular functions                                                    |                                         | p-value / molecules      |
|-----------|------|-------------------------------------------------------------------------------------|-----------------------------------------|--------------------------|
| cluster 1 | 1    | 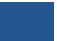   | cell death                              | 2.62E-06 - 4.74E-02 / 28 |
|           | 2    | 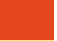   | post-translational modification         | 1.04E-05 - 2.94E-02 / 12 |
|           | 3    | 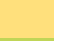   | protein folding                         | 1.04E-05 - 3.37E-03 / 5  |
|           | 4    | 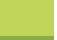   | cellular movement                       | 2.25E-04 - 4.74E-02 / 19 |
|           | 5    | 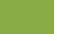   | cellular growth and proliferation       | 3.18E-04 - 4.74E-02      |
| cluster 2 | 1    | 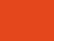   | post-translational modification         | 5.83E-08 - 1.53E-02 / 10 |
|           | 2    | 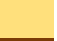   | protein folding                         | 5.83E-08 - 1.05E-06 / 6  |
|           | 3    | 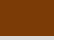   | cellular function and maintainance      | 5.91E-05 - 4.91E-02 / 6  |
|           | 4    | 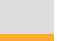   | protein degradation                     | 7.24E-05 - 7.24E-05 / 2  |
|           | 5    | 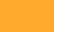   | protein synthesis                       | 1.88E-04 - 3.95E-02 / 8  |
| cluster 3 | 1    | 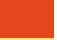   | post-translational modification         | 1.06E-10 - 5.00E-02 / 19 |
|           | 2    | 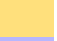   | protein folding                         | 1.06E-10 - 2.53E-02 / 8  |
|           | 3    | 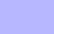   | amino acid metabolism                   | 3.06E-07 - 2.19E-02 / 6  |
|           | 4    | 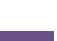   | small molecule biochemistry             | 3.06E-07 - 4.39E-02 / 17 |
|           | 5    | 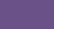   | cell to cell signalling and interaction | 4.16E-06 - 5.00E-02 / 16 |
| cluster 4 | 1    | 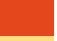   | post-translational modification         | 1.94E-06 - 3.83E-02 / 14 |
|           | 2    | 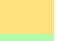  | protein folding                         | 1.94E-06 - 6.41E-04 / 6  |
|           | 3    | 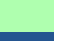 | cell morphology                         | 1.09E-04 - 4.78E-02 / 20 |
|           | 4    | 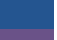 | cell death                              | 1.18E-04 - 4.91E-02 / 28 |
|           | 5    | 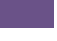 | cell to cell signalling and interaction | 2.31E-02 - 4.29E-02 / 6  |
| cluster 5 | 1    | 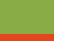 | cellular growth and proliferation       | 1.62E-10 - 3.47E-02 / 42 |
|           | 2    | 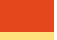 | post-translational modification         | 1.53E-08 - 3.47E-02 / 15 |
|           | 3    | 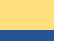 | protein folding                         | 1.53E-08 - 1.17E-02 / 9  |
|           | 4    | 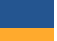 | cell death                              | 2.50E-06 - 3.47E-02 / 37 |
|           | 5    | 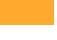 | protein synthesis                       | 1.17E-05 - 3.14E-02 / 15 |

Table S-5

|                   | rank | Molecular and cellular functions                                                                                       | p-value / molecules      |
|-------------------|------|------------------------------------------------------------------------------------------------------------------------|--------------------------|
| <b>cluster 6</b>  | 1    | 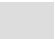 protein degradation                  | 1.51E-05 - 1.51E-05 / 2  |
|                   | 2    | 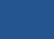 cell death                           | 1.25E-04 - 4.31E-02 / 6  |
|                   | 3    | 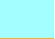 gene expression                      | 1.37E-04 - 4.71E-02 / 6  |
|                   | 4    | 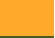 protein synthesis                    | 1.37E-04 - 2.68E-02 / 4  |
|                   | 5    | 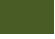 cellular development                 | 1.25E-03 - 4.22E-02 / 9  |
| <b>cluster 7</b>  | 1    | 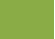 cellular growth and proliferation    | 1.02E-13 - 3.84E-02 / 73 |
|                   | 2    |  cell death                           | 1.04E-09 - 4.06E-02 / 88 |
|                   | 3    | 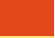 post-translational modification      | 9.69E-09 - 3.66E-02 / 38 |
|                   | 4    | 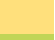 protein folding                      | 9.69E-09 - 1.41E-02 / 11 |
|                   | 5    | 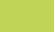 cellular movement                    | 2.08E-05 - 2.79E-02 / 34 |
| <b>cluster 8</b>  | 1    | 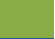 cellular growth and proliferation    | 3.62E-09 - 3.08E-02 / 55 |
|                   | 2    | 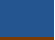 cell death                           | 3.42E-07 - 3.46E-02 / 44 |
|                   | 3    | 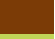 cellular function and maintainance   | 2.18E-06 - 3.77E-02 / 22 |
|                   | 4    | 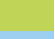 cellular movement                    | 1.07E-05 - 2.78E-02 / 28 |
|                   | 5    | 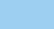 cellular assembly and organization   | 2.58E-05 - 3.77E-02 / 34 |
| <b>cluster 9</b>  | 1    | 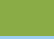 cellular growth and proliferation    | 2.82E-05 - 3.42E-02 / 30 |
|                   | 2    | 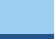 cellular assembly and organization  | 4.76E-05 - 4.75E-02 / 21 |
|                   | 3    | 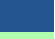 cell death                         | 7.01E-05 - 4.75E-02 / 38 |
|                   | 4    | 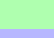 cell morphology                    | 1.42E-04 - 4.89E-02 / 15 |
|                   | 5    |  amino acid metabolism              | 4.69E-04 - 4.09E-02 / 4  |
| <b>cluster 10</b> | 1    | 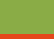 cellular growth and proliferation  | 2.44E-07 - 3.19E-02 / 22 |
|                   | 2    | 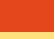 post-translational modification    | 3.18E-07 - 2.84E-02 / 11 |
|                   | 3    | 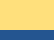 protein folding                    | 3.18E-07 - 2.84E-02 / 6  |
|                   | 4    | 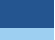 cell death                         | 6.99E-07 - 4.77E-02 / 25 |
|                   | 5    | 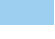 cellular assembly and organization | 1.27E-05 - 4.92E-02 / 17 |

Table S-6

**Table S-6:** Up-regulated proteins (fold-changes  $\geq 1.5$ ) in response to short-term and long-term cultivation after CAP treatment or both. Protein annotation name<sup>1</sup>, function<sup>2</sup>, highest fold-change<sup>3</sup> and a (presumed) functional description<sup>4</sup> is given. These proteins can serve as marker proteins.

Table S-6

## Short term induced

| Protein <sup>1</sup> | Function <sup>2</sup>                         | Fold changes <sup>3</sup> | Functional description <sup>4</sup>                                                                                                                                                                                                                                                                                                                                                                                                                                                              |
|----------------------|-----------------------------------------------|---------------------------|--------------------------------------------------------------------------------------------------------------------------------------------------------------------------------------------------------------------------------------------------------------------------------------------------------------------------------------------------------------------------------------------------------------------------------------------------------------------------------------------------|
| CALM                 | Calmodulin-1                                  | 3,171241                  | mediates the control of a large number of enzymes, ion channels, aquaporins and other proteins through calcium-binding                                                                                                                                                                                                                                                                                                                                                                           |
| NSAP                 | Heterogeneous nuclear ribonucleoprotein Q     | 2,667590                  | implicated in mRNA processing mechanisms. Component of the CRD-mediated complex that promotes MYC mRNA stability                                                                                                                                                                                                                                                                                                                                                                                 |
| TCPA                 | T-complex protein 1 subunit alpha             | 2,113189                  | molecular chaperone; assists the folding of proteins upon ATP hydrolysis; as part of the BBS/CCT complex may play a role in the assembly of BBSome, a complex involved in ciliogenesis regulating transports vesicles to the cilia                                                                                                                                                                                                                                                               |
| LMNB1                | Lamin-B1                                      | 2,107199                  | components of the nuclear lamina, a fibrous layer on the nucleoplasmic side of the inner nuclear membrane, which is thought to provide a framework for the nuclear envelope and may also interact with chromatin                                                                                                                                                                                                                                                                                 |
| VIME                 | Vimentin                                      | 2,020745                  | vimentins are class-III intermediate filaments found in various non-epithelial cells, especially mesenchymal cells; attached to the nucleus, endoplasmic reticulum, and mitochondria, either laterally or terminally; major cytoskeletal component of mesenchymal cells. Because of this, vimentin is often used as a marker of mesenchymally-derived cells or cells undergoing an epithelial-to-mesenchymal transition (EMT) during both normal development and metastatic progression.         |
| HSPB1                | Heat shock protein beta-1                     | 1,906802                  | small heat shock protein which functions as a molecular chaperone probably maintaining denatured proteins in a folding-competent state. Plays a role in stress resistance and actin organization                                                                                                                                                                                                                                                                                                 |
| IMA7                 | Importin subunit alpha-7                      | 1,800911                  | functions in nuclear protein import as an adapter protein for nuclear receptor KPNB1                                                                                                                                                                                                                                                                                                                                                                                                             |
| FSTL1                | Follistatin-related protein 1                 | 1,778680                  | may modulate the action of some growth factors on cell proliferation and differentiation                                                                                                                                                                                                                                                                                                                                                                                                         |
| KBP                  | KIF1-binding protein                          | 1,660694                  | required for organization of axonal microtubules, and axonal outgrowth and maintenance during peripheral and central nervous system development                                                                                                                                                                                                                                                                                                                                                  |
| K2C8                 | Keratin, type II cytoskeletal 8               | 1,660645                  | plays a role in keratin filament assembly                                                                                                                                                                                                                                                                                                                                                                                                                                                        |
| LMNA                 | Prelamin-A/C                                  | 1,623751                  | components of the nuclear lamina, a fibrous layer on the nucleoplasmic side of the inner nuclear membrane, which is thought to provide a framework for the nuclear envelope and may also interact with chromatin                                                                                                                                                                                                                                                                                 |
| PRS4                 | 26S proteasome regulatory subunit 4           | 1,596090                  | component of the 26S proteasome, a multiprotein complex involved in the ATP-dependent degradation of ubiquitinated proteins; this complex plays a key role in the maintenance of protein homeostasis by removing misfolded or damaged proteins, which could impair cellular functions, and by removing proteins whose functions are no longer required; therefore, the proteasome participates in numerous cellular processes, including cell cycle progression, apoptosis, or DNA damage repair |
| MX1                  | Interferon-induced GTP-binding protein Mx1    | 1,556947                  | interferon-induced dynamin-like GTPase with antiviral activity against a wide range of RNA viruses and some DNA viruses; enhances ER stress-mediated cell death after influenza virus infection. May regulate the calcium channel activity of TRPCs                                                                                                                                                                                                                                              |
| FKBP9                | Peptidyl-prolyl cis-trans isomerase FKBP9     | 1,555623                  | PPIases accelerate the folding of proteins during protein synthesis                                                                                                                                                                                                                                                                                                                                                                                                                              |
| MARCS                | Myristoylated alanine-rich C-kinase substrate | 1,536069                  | MARCKS is the most prominent cellular substrate for protein kinase C; binds calmodulin, actin, and synapsin; filamentous (F) actin cross-linking protein                                                                                                                                                                                                                                                                                                                                         |
| CH60                 | 60 kDa heat shock protein, mitochondrial      | 1,529091                  | chaperonin implicated in mitochondrial protein import and macromolecular assembly. Together with Hsp10, facilitates the correct folding of imported proteins; may also prevent misfolding and promote the refolding and proper assembly of unfolded polypeptides generated under stress conditions in the mitochondrial matrix                                                                                                                                                                   |
| P4HA1                | Prolyl 4-hydroxylase subunit alpha-1          | 1,525163                  | catalyzes the post-translational formation of 4-hydroxyproline in -Xaa-Pro-Gly- sequences in collagens and other proteins                                                                                                                                                                                                                                                                                                                                                                        |
| K1C17                | Keratin, type I cytoskeletal 17               | 1,502958                  | involved in tissue repair; acts as a promoter of epithelial proliferation by acting a regulator of immune response in skin; positive regulation of cell growth                                                                                                                                                                                                                                                                                                                                   |

Table S-6

## Long term induced

| Protein <sup>1</sup> | Function <sup>2</sup>                            | Fold changes <sup>3</sup> | Functional description <sup>4</sup>                                                                                                                                                                                                                                                                                                    |
|----------------------|--------------------------------------------------|---------------------------|----------------------------------------------------------------------------------------------------------------------------------------------------------------------------------------------------------------------------------------------------------------------------------------------------------------------------------------|
| QCR1                 | Cytochrome b-c1 complex subunit 1, mitochondrial | 11,943578                 | this is a component of the ubiquinol-cytochrome c reductase complex (complex III or cytochrome b-c1 complex), which is part of the mitochondrial respiratory chain.                                                                                                                                                                    |
| CALD1                | Caldesmon                                        | 6,007415                  | actin- and myosin-binding protein implicated in the regulation of actomyosin interactions in smooth muscle and nonmuscle cells (could act as a bridge between myosin and actin filaments)                                                                                                                                              |
| DP13B                | DCC-interacting protein 13-beta                  | 4,096890                  | required for the regulation of cell proliferation in response to extracellular signals mediated by an early endosomal compartment                                                                                                                                                                                                      |
| SCFD1                | Sec1 family domain-containing protein 1          | 3,165289                  | plays a role in SNARE-pin assembly and Golgi-to-ER retrograde transport via its interaction with COG4. Involved in vesicular transport between the endoplasmic reticulum and the Golgi                                                                                                                                                 |
| TXND5                | Thioredoxin domain-containing protein 5          | 2,695739                  | possesses thioredoxin activity. Has been shown to reduce insulin disulfide bonds; complements protein disulfide-isomerase deficiency in yeast                                                                                                                                                                                          |
| SYG                  | Glycine--tRNA ligase                             | 2,686072                  | catalyzes the ligation of glycine to the 3'-end of its cognate tRNA. Also produces diadenosine tetraphosphate (Ap4A), a universal pleiotropic signaling molecule needed for cell regulation pathways, by direct condensation of 2 ATPs                                                                                                 |
| COR1B                | Coronin-1B                                       | 2,381682                  | regulates leading edge dynamics and cell motility in fibroblasts; may be involved in cytokinesis and signal transduction                                                                                                                                                                                                               |
| ERP29                | Endoplasmic reticulum resident protein 29        | 2,181211                  | plays an important role in the processing of secretory proteins within the endoplasmic reticulum (ER), possibly by participating in the folding of proteins in the ER                                                                                                                                                                  |
| RCN1                 | Reticulocalbin-1                                 | 2,177496                  | may regulate calcium-dependent activities in the endoplasmic reticulum lumen or post-ER compartment                                                                                                                                                                                                                                    |
| PRDX4                |                                                  | 2,154153                  | thiol-specific peroxidase that catalyzes the reduction of hydrogen peroxide and organic hydroperoxides to water and alcohols, respectively; plays a role in cell protection against oxidative stress by detoxifying peroxides and as sensor of hydrogen peroxide-mediated signaling events                                             |
| EZRI                 | Ezrin                                            | 2,135899                  | probably involved in connections of major cytoskeletal structures to the plasma membrane. In epithelial cells, required for the formation of microvilli and membrane ruffles on the apical pole. Along with PLEKHG6, required for normal macropinocytosis                                                                              |
| TXNL5                | Thioredoxin domain-containing protein 17         | 2,130670                  | disulfide reductase. May participate in various redox reactions through the reversible oxidation of its active center dithiol to a disulfide and catalyze dithiol-disulfide exchange reactions. Has peroxidase activity and may contribute to the elimination of cellular hydrogen peroxide                                            |
| NPM                  | Nucleophosmin                                    | 2,098274                  | involved in diverse cellular processes such as ribosome biogenesis, centrosome duplication, protein chaperoning, histone assembly, cell proliferation, and regulation of tumor suppressors p53/TP53 and ARF                                                                                                                            |
| STML2                | Stomatin-like protein 2, mitochondrial           | 2,049966                  | mitochondrial protein that probably regulates the biogenesis and the activity of mitochondria; through regulation of the mitochondrial function may play a role into several biological processes including cell migration, cell proliferation, T-cell activation, calcium homeostasis and cellular response to stress                 |
| THIO                 | Thioredoxin                                      | 1,980648                  | participates in various redox reactions through the reversible oxidation of its active center dithiol to a disulfide and catalyzes dithiol-disulfide exchange reactions; plays a role in the reversible S-nitrosylation of cysteine residues in target proteins, and thereby contributes to the response to intracellular nitric oxide |
| MAOX                 | NADP-dependent malic enzyme                      | 1,970692                  | glycolytic enzyme ???                                                                                                                                                                                                                                                                                                                  |
| HYOU1                | Hypoxia up-regulated protein 1                   | 1,908457                  | has a pivotal role in cytoprotective cellular mechanisms triggered by oxygen deprivation; may play a role as a molecular chaperone and participate in protein folding                                                                                                                                                                  |
| SF3B2                | Splicing factor 3B subunit 2                     | 1,878931                  | involved in pre-mRNA splicing as a component of the splicing factor SF3B complex                                                                                                                                                                                                                                                       |
| PSME2                | Proteasome activator complex subunit 2           | 1,821719                  | implicated in immunoproteasome assembly and required for efficient antigen processing                                                                                                                                                                                                                                                  |
| GELS                 | Gelsolin                                         | 1,814354                  | calcium-regulated, actin-modulating protein that binds to the plus (or barbed) ends of actin monomers or filaments, preventing monomer exchange (end-blocking or capping); can promote the assembly of monomers into filaments (nucleation) as well as sever filaments already formed; plays a role in ciliogenesis                    |
| PHP14                | 14 kDa phosphohistidine phosphatase              | 1,771815                  | peptidyl-histidine dephosphorylation; positive regulation of cell motility; regulation of actin cytoskeleton reorganization                                                                                                                                                                                                            |
| LG3BP                | Galectin-3-binding protein                       | 1,715210                  | promotes integrin-mediated cell adhesion. May stimulate host defense against viruses and tumor cells                                                                                                                                                                                                                                   |
| CBX5                 | Chromobox protein homolog 5                      | 1,637215                  | component of heterochromatin that recognizes and binds histone H3 tails methylated at 'Lys-9' (H3K9me), leading to epigenetic repression                                                                                                                                                                                               |
| PDIA6                | Protein disulfide-isomerase A6                   | 1,624036                  | may function as a chaperone that inhibits aggregation of misfolded proteins                                                                                                                                                                                                                                                            |
| ATPB                 | ATP synthase subunit beta, mitochondrial         | 1,552042                  | mitochondrial membrane ATP synthase (F1F0 ATP synthase or Complex V) produces ATP from ADP in the presence of a proton gradient across the membrane                                                                                                                                                                                    |
| TSNAX                | Translin-associated protein X                    | 1,518427                  | acts in combination with TSN as an endonuclease involved in the activation of the RNA-induced silencing complex                                                                                                                                                                                                                        |
| PSME1                | Proteasome activator complex subunit 1           | 1,515996                  | implicated in immunoproteasome assembly and required for efficient antigen processing                                                                                                                                                                                                                                                  |

Table S-6

## Short &amp; Long term induced

| Protein <sup>1</sup> | Function <sup>2</sup>                                         | Fold changes <sup>3</sup> | Functional description <sup>4</sup>                                                                                                                                                                                                                                                                              |
|----------------------|---------------------------------------------------------------|---------------------------|------------------------------------------------------------------------------------------------------------------------------------------------------------------------------------------------------------------------------------------------------------------------------------------------------------------|
| ARP3                 | ARP3 actin-related protein 3                                  | 55,374106                 | regulation of actin polymerization; role in ciliogenesis                                                                                                                                                                                                                                                         |
| DCTN1                | dynactin 1                                                    | 7,157172                  | key role in dynein-mediated retrograde transport of vesicles and organelles along microtubules; regulation of microtubule stability by promoting microtubule formation                                                                                                                                           |
| GRP78 (BIP)          | heat shock 70kDa protein 5 (glucose-regulated protein, 78kDa) | 5,797061                  | endoplasmic reticulum chaperone that plays a key role in protein folding and quality control in the endoplasmic reticulum lumen                                                                                                                                                                                  |
| UBQL1                | ubiquilin 1                                                   | 4,268907                  | important role in the regulation of different protein degradation mechanisms and pathways including ubiquitin-proteasome system (UPS); attenuating the induction of UPR-inducible genes                                                                                                                          |
| 2AAB                 | protein phosphatase 2, regulatory subunit A, beta             | 4,190876                  | positive regulation of extrinsic apoptotic signaling pathway in absence of ligand                                                                                                                                                                                                                                |
| RD23B                | UV excision repair protein RAD23 homolog B                    | 3,880998                  | involved in global genome nucleotide excision repair (GG-NER) by acting as component of the XPC complex; the XPC complex recognizes a wide spectrum of damaged DNA characterized by distortions of the DNA helix such as single-stranded loops, mismatched bubbles or single-stranded overhangs                  |
| HNRPK                | heterogeneous nuclear ribonucleoprotein K                     | 3,874541                  | plays an important role in p53/TP53 response to DNA damage;                                                                                                                                                                                                                                                      |
| MCM6                 | DNA replication licensing factor MCM6                         | 3,850676                  | acts as component of the MCM2-7 complex (MCM complex) which is the putative replicative helicase essential for 'once per cell cycle' DNA replication initiation and elongation in eukaryotic cells                                                                                                               |
| TM1L2                | TOM1-like protein 2                                           | 3,834643                  | probable role in protein transport; may regulate growth factor-induced mitogenic signaling                                                                                                                                                                                                                       |
| DPYL2                | dihydropyrimidinase-related protein 2                         | 3,795573                  | plays a role in neuronal development and polarity, as well as in axon growth and guidance, neuronal growth cone collapse and cell migration; microtubule binding                                                                                                                                                 |
| HSP71                | Heat shock 70 kDa protein 1A                                  | 3,713209                  | plays a pivotal role in the protein quality control system, ensuring the correct folding of proteins, the re-folding of misfolded proteins and controlling the targeting of proteins for subsequent degradation                                                                                                  |
| CALR                 | calreticulin                                                  | 3,664755                  | Calcium-binding chaperone that promotes folding, oligomeric assembly and quality control in the endoplasmic reticulum (ER) via the calreticulin/calnexin cycle                                                                                                                                                   |
| ENOA                 | enolase 1, (alpha)                                            | 3,540622                  | multifunctional enzyme that, as well as its role in glycolysis, plays a part in various processes such as growth control, hypoxia tolerance and allergic responses                                                                                                                                               |
| TRXR1                | thioredoxin reductase 1                                       | 3,520093                  | isoform 1 may possess glutaredoxin activity as well as thioredoxin reductase activity and induces actin and tubulin polymerization, leading to formation of cell membrane protrusions                                                                                                                            |
| ALDOA                | Fructose-bisphosphate aldolase A                              | 3,495068                  | plays a key role in glycolysis and gluconeogenesis. In addition, may also function as scaffolding protein                                                                                                                                                                                                        |
| ANXA5                | annexin A5                                                    | 3,495068                  | ability to bind to phosphatidylserine, a marker of apoptosis when it is on the outer leaflet of the plasma membrane                                                                                                                                                                                              |
| K1C9                 | keratin, type I cytoskeletal 9                                | 3,191425                  | plays a role in keratin filament assembly                                                                                                                                                                                                                                                                        |
| STABP                | STAM binding protein                                          | 3,182033                  | Zinc metalloprotease that specifically cleaves 'Lys-63'-linked polyubiquitin chains; plays a role in signal transduction for cell growth and MYC induction mediated by IL-2 and GM-CSF; endosomal localization of STAMPB is required for efficient EGFR degradation but not for its internalization              |
| NP1L4                | nucleosome assembly protein 1-like 4                          | 3,145248                  | acts as histone chaperone in nucleosome assembly                                                                                                                                                                                                                                                                 |
| PDIA1                | prolyl 4-hydroxylase, beta polypeptide                        | 3,065948                  | multifunctional protein catalyzes the formation, breakage and rearrangement of disulfide bonds; at the cell surface, seems to act as a reductase that cleaves disulfide bonds of proteins attached to the cell; at high concentrations, functions as a chaperone that inhibits aggregation of misfolded proteins |
| TBA3                 | tubulin alpha-1A chain                                        | 3,051881                  | major constituent of microtubules                                                                                                                                                                                                                                                                                |
| PDIA4                | protein disulfide isomerase family A, member 4                | 2,982396                  | peptide disulfide oxidoreductase activity; response to endoplasmic reticulum stress                                                                                                                                                                                                                              |
| GDIA                 | GDP dissociation inhibitor 1                                  | 2,928630                  | controls Rho proteins homeostasis                                                                                                                                                                                                                                                                                |
| NP1L1                | nicotinamide N-methyltransferase                              | 2,811353                  | may be involved in modulating chromatin formation and contribute to regulation of cell proliferation                                                                                                                                                                                                             |
| ACTG                 | actin, gamma 1                                                | 2,790079                  | component of the cytoskeleton and as mediators of internal cell motility                                                                                                                                                                                                                                         |
| RANB3                | RAN binding protein 3                                         | 2,757964                  | G1/S transition of mitotic cell cycle; acts as a cofactor for XPO1/CRM1-mediated nuclear export; negative regulator of TGF-beta signaling through interaction with the R-SMAD proteins, SMAD2 and SMAD3, and mediating their nuclear export                                                                      |
| SYK                  | lysyl-tRNA ligase                                             | 2,642445                  | when secreted, acts as a signaling molecule that induces immune response through the activation of monocyte/macrophages                                                                                                                                                                                          |
| HS90A                | heat shock protein 90kDa alpha (cytosolic), class A member 1  | 2,620103                  | molecular chaperone that promotes the maturation, structural maintenance and proper regulation of specific target proteins involved for instance in cell cycle control and signal transduction                                                                                                                   |
| SDC10                | peptidyl-prolyl cis-trans isomerase CWC27 homolog             | 2,571389                  | as part of the spliceosome, plays a role in pre-mRNA splicing; probable inactive PPIase with no peptidyl-prolyl cis-trans isomerase activity                                                                                                                                                                     |
| RHG01                | Rho GTPase activating protein 1                               | 2,569763                  | GTPase activator for the Rho, Rac and Cdc42 proteins, converting them to the putatively inactive GDP-bound state                                                                                                                                                                                                 |
| TRFL                 | lactotransferrin                                              | 2,540804                  | iron binding transport proteins which can bind two Fe3+ ions in association with the binding of an anion, usually bicarbonate; has antimicrobial activity, which depends on the extracellular cation concentration                                                                                               |
| NUCB1                | nucleobindin 1                                                | 2,123962                  | major calcium-binding protein of the Golgi; may have a role in calcium homeostasis                                                                                                                                                                                                                               |

Table S-6

| Protein <sup>1</sup> | Function <sup>2</sup>                       | Fold changes <sup>3</sup> | Functional description <sup>4</sup>                                                                                                                                                                                                                                                              |
|----------------------|---------------------------------------------|---------------------------|--------------------------------------------------------------------------------------------------------------------------------------------------------------------------------------------------------------------------------------------------------------------------------------------------|
| PDIA3                | protein disulfide-isomerase A3              | 2,106542                  | catalyzes the rearrangement of -S-S- bonds in proteins; positive regulation of extrinsic apoptotic signaling pathway; protein folding in endoplasmic reticulum; response to endoplasmic reticulum stress                                                                                         |
| ENPL                 | endoplasmin                                 | 2,025110                  | molecular chaperone that functions in the processing and transport of secreted proteins; actin rod assembly; negative regulation of apoptotic process; protein folding in endoplasmic reticulum; response to endoplasmic reticulum stress; response to hypoxia; ubiquitin-dependent ERAD pathway |
| CATB                 | cathepsin B                                 | 1,924969                  | thiol protease which is believed to participate in intracellular degradation and turnover of proteins; epithelial cell differentiation; regulation of apoptotic process                                                                                                                          |
| ACTB                 | actin, beta                                 | 1,897699                  | component of the cytoskeleton and as mediators of internal cell motility                                                                                                                                                                                                                         |
| CRK                  | adapter molecule crk                        | 1,871735                  | isoform Crk-II: Regulates cell adhesion, spreading and migration; involved in phagocytosis of apoptotic cells and cell motility via its interaction with DOCK1 and DOCK4                                                                                                                         |
| SSRD                 | translocon-associated protein subunit delta | 1,742402                  | TRAP proteins are part of a complex whose function is to bind calcium to the ER membrane and thereby regulate the retention of ER resident proteins                                                                                                                                              |
